# Supplementary material for: Photochromic dinuclear iridium(iii) complexes having phenoxyl-imidazolyl radical complex derivatives
Source: Royal Society of Chemistry journal article supplement (doi:10.1039/d3cc02208k), 2023-01-01
Supplement: d3cc02208k1.pdf [file d3cc02208k1.pdf]

**Electronic Supplementary Information for:**

**Photochromic dinuclear iridium(III) complexes having  
phenoxy-imidazolyl complexes derivatives**

*Yoshinori Okayasu,<sup>a</sup> Takuya Miyahara,<sup>a</sup> Rintaro Shimada,<sup>b</sup> Yuki Nagai,<sup>a</sup> Akira Sakamoto,<sup>b</sup> Jiro Abe,<sup>b\*</sup> and Yoichi Kobayashi<sup>a\*</sup>*

<sup>a</sup> *Department of Applied Chemistry, College of Life Sciences, Ritsumeikan University, 1-1-1 Nojihigashi, Kusatsu, Shiga 525-8577, Japan.*

<sup>b</sup> *Department of Chemistry and Biological Science, College of Science and Engineering, Aoyama Gakuin University, 5-10-1 Fuchinobe, Chuo-ku, Sagami-hara, Kanagawa 252-5258, Japan.*

E-mail: [ykobayas@fc.ritsumeikan.ac.jp](mailto:ykobayas@fc.ritsumeikan.ac.jp), [jiro\\_abe@chem.aoyama.ac.jp](mailto:jiro_abe@chem.aoyama.ac.jp)

**CONTENTS**

|                                                                       |             |
|-----------------------------------------------------------------------|-------------|
| <b>1. Syntheses</b>                                                   | <b>S2</b>   |
| <b>2. Experimental Setups</b>                                         | <b>S3</b>   |
| <b>3. <sup>1</sup>H NMR Spectra</b>                                   | <b>S6</b>   |
| <b>4. HR-ESI-TOF-MS Spectra</b>                                       | <b>S7</b>   |
| <b>5. X-ray Crystallographic Analyses</b>                             | <b>S8</b>   |
| <b>6. Nanosecond to Microsecond Transient Absorption Measurements</b> | <b>S10</b>  |
| <b>7. Kinetics for the Ring-Closing Reaction</b>                      | <b>S13</b>  |
| <b>8. Femtosecond to Nanosecond Transient Absorption Measurements</b> | <b>S14</b>  |
| <b>9. Time-resolved IR Spectra</b>                                    | <b>S16</b>  |
| <b>10. Detailed Discussion of the Decay of the Open-Ring Form</b>     | <b>S17</b>  |
| <b>11. DFT Calculations</b>                                           | <b>S19</b>  |
| <b>12. References</b>                                                 | <b>S639</b> |

## 1. Syntheses

All reactions were monitored by thin-layer chromatography carried out on 0.2 mm E. Merck silica gel plates (60F-254). Column chromatography was performed on silica gel (silica gel 60N, Kanto Chemical Co., Inc.). Proton nuclear magnetic resonance ( $^1\text{H}$  NMR) spectra were recorded at 400 MHz by JNM-ECS 400 MHz (JEOL). High resolution (HR) ESI-TOF-MS spectra were recorded on a Bruker micrOTOF II-AGA1 (Bruker). All reagents were purchased from Tokyo Chemical Industry Co. (TCI), FUJIFILM Wako Pure Chemical Co and Kanto Chemical Co. and were used without further purification. Phenoxy-imidazolyl radical complexes, **PIC** and **tBu-PIC**, were synthesized according to the literature.<sup>S1</sup>  $[\text{Ir}(\mu\text{-Cl})(2\text{-phenylpyridine})_2]_2$  was synthesized according to the literature.<sup>S2</sup>

**Scheme S1.** Synthesis of  $[\text{Ir}(\mu\text{-Cl})(\text{PIC})_2]_2$ .

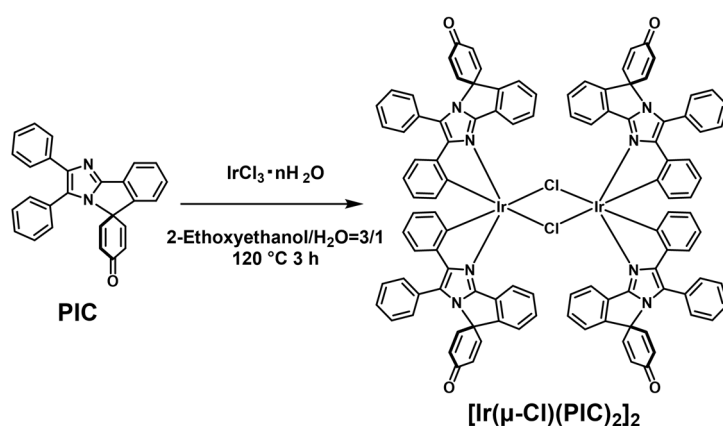

### $[\text{Ir}(\mu\text{-Cl})(\text{PIC})_2]_2$

A Schlenk flask was charged with **PIC** (120 mg, 0.31 mmol) and iridium(III) chloride hydrate (44 mg, 0.15 mmol) in the solvent pair (6 mL of 2-ethoxyethanol / 2 mL of  $\text{H}_2\text{O}$ ). The solution was stirred at 120 °C for 3 h. After cooling to room temperature, the reaction mixture was filtered, washed with hexane and  $\text{H}_2\text{O}$ . The crude product was purified by recrystallization from  $\text{CH}_2\text{Cl}_2$ /hexane to give desired product as pale yellow crystals (84.0 mg, 57%).  $^1\text{H}$ -NMR (400 MHz,  $\text{CD}_2\text{Cl}_2$ ):  $\delta$  9.75 (dd,  $J = 7.7, 0.9$  Hz, 4H), 7.56–7.40 (m, 18H), 7.31–7.22 (m, 16H), 6.71 (d,  $J = 7.7$  Hz, 4H), 6.51–6.40 (m, 8H), 6.24 (dt,  $J = 9.8, 2.6$  Hz, 4H), 6.15 (dd,  $J = 9.7, 2.0$  Hz, 4H), 6.04 (dd,  $J = 10.0, 1.8$  Hz, 4H), 5.91 (d,  $J = 7.7$  Hz, 4H). HRMS (ESI-TOF): calcd. for  $[\text{C}_{54}\text{H}_{34}\text{IrN}_4\text{O}_2]^+$ , 963.2260; found, 963.2309.

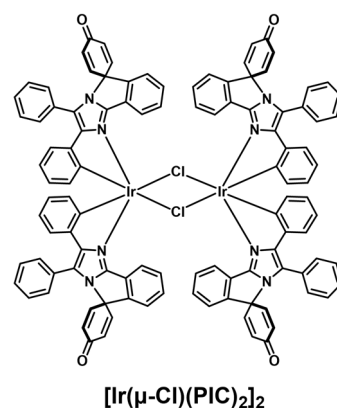

**Scheme S2.** Synthesis of  $[\text{Ir}(\mu\text{-Cl})(\text{tBu-PIC})_2]_2$ .

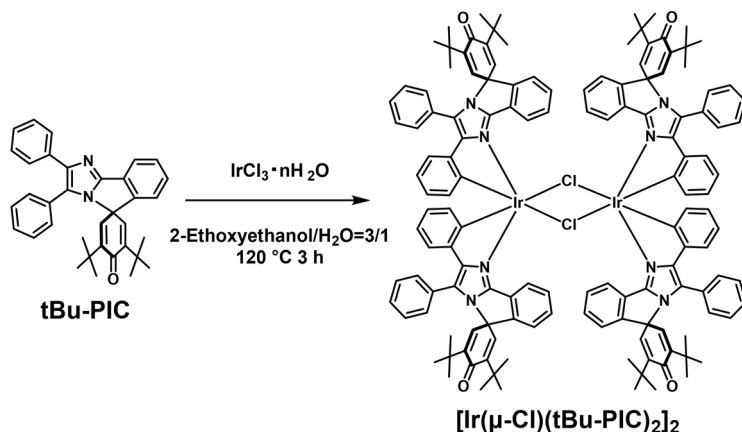

### $[\text{Ir}(\mu\text{-Cl})(\text{tBu-PIC})_2]_2$

A Schlenk flask was charged with **tBu-PIC** (250 mg, 0.50 mmol) and iridium(III) chloride hydrate (71 mg, 0.24 mmol) in the solvent pair (6 mL of 2-ethoxyethanol/2 mL of  $\text{H}_2\text{O}$ ). The solution was stirred at 120 °C for 3 h. After cooling to room temperature, the reaction mixture was filtered, washed with hexane and  $\text{H}_2\text{O}$ . The crude product was purified by recrystallization from 1,2-dichloroethane/hexane to give desired product as pale-yellow crystals (188 mg, 64%).  $^1\text{H-NMR}$  (400 MHz,  $\text{CDCl}_3$ ):  $\delta$  9.74 (dd,  $J = 6.8, 1.8$  Hz, 4H), 7.44–7.37 (m, 20H), 7.23 (d,  $J = 4.1$  Hz, 8H), 6.99 (dd,  $J = 6.6, 2.0$  Hz, 4H), 6.61 (dd,  $J = 7.2, 1.4$  Hz, 4H), 6.39 (td,  $J = 7.4, 1.1$  Hz, 4H), 6.30 (td,  $J = 7.6, 1.5$  Hz, 4H), 6.09 (d,  $J = 7.2$  Hz, 4H), 5.79 (d,  $J = 2.7$  Hz, 4H), 5.52 (d,  $J = 2.7$  Hz, 4H), 1.20–1.14 (m, 36H), 0.96 (s, 36H). HRMS (ESI-TOF): calcd. for  $[\text{C}_{70}\text{H}_{66}\text{Ir}_4\text{O}_2]^+$ , 1187.4763; found, 1187.4816.

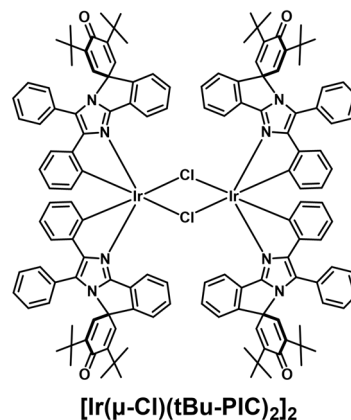

## 2. Experimental Setups

### X-ray crystallography

Details of the crystal data and a summary of the intensity data collection parameters for  $[\text{Ir}(\mu\text{-Cl})(\text{PIC})_2]_2$  and  $[\text{Ir}(\mu\text{-Cl})(\text{tBu-PIC})_2]_2$  are listed in Table S1. A single crystal of  $[\text{Ir}(\mu\text{-Cl})(\text{PIC})_2]_2$  was obtained by vapor diffusion of *n*-hexane into a dichloromethane solution. The data crystal was a yellow prism of approximate dimensions 0.328 mm × 0.258 mm × 0.095 mm. A single crystal of  $[\text{Ir}(\mu\text{-Cl})(\text{tBu-PIC})_2]_2$  was obtained by vapor diffusion of *n*-hexane into a 1,2-dichloroethane solution. The data crystal was a yellow prism of approximate dimensions 0.863 mm × 0.476 mm × 0.222 mm. The data of  $[\text{Ir}(\mu\text{-Cl})(\text{PIC})_2]_2$  and  $[\text{Ir}(\mu\text{-Cl})(\text{tBu-PIC})_2]_2$  were collected at 90 K on a

Bruker D8 Venture diffractometer with Mo-K $\alpha$  radiation ( $\lambda = 0.71073 \text{ \AA}$ ) focused by multilayer confocal mirror. All the structures were solved by dual-space method. The structures were refined by a full-matrix least-squares method by using a SHELXL 2014.<sup>S3</sup> In each structure, the non-hydrogen atoms were refined anisotropically. The contribution to the scattering arising from the presence of disordered solvents in the crystal of **[Ir( $\mu$ -Cl)(tBu-PIC) $_2$ ] $_2$  were removed by use of the utility SQUEEZE in the PLATON software package.<sup>S4</sup> CIF files (CCDC2245412–2245413) can be obtained free of charge from the Cambridge Crystallographic Data Centre via [www.ccdc.cam.ac.uk/data\\_request/cif](http://www.ccdc.cam.ac.uk/data_request/cif).**

### **Steady-State Spectroscopic Measurements**

Absorption spectra were measured on a UV3600 spectrophotometer (Shimadzu). The measurements were performed in dichloromethane solutions placed in a 10-mm quartz cell at room temperature after bubbling nitrogen gas to the solution for 10 min.

### **Nanosecond-to-Microsecond Transient Absorption Measurements**

Submicrosecond-to-millisecond transient absorption measurements were conducted using a TSP–2000 time resolved spectrophotometer (Unisoku). The second or third harmonics (532 and 355 nm) of a 10 Hz Q-switched Nd:YAG laser (Continuum Minilite II) (ca. 1–2 mJ per 5 ns pulse) were used as the excitation light. Nanosecond transient absorption measurements were conducted by the randomly interleaved-pulse-train (RIPT) method. A picosecond laser, PL2210A (EKSPLA, 1 kHz, 25 ps, 3.4 mJ pulse<sup>-1</sup> for 355 nm), and a supercontinuum (SC) radiation source (SC-450, Fianium, 20 MHz, pulse width = 50–100 ps depending on the wavelength, 450–2000 nm) were employed as the pump pulse and probe sources, respectively. The wavelength of the excitation pulse was altered 355 nm. The measurements were performed in a dichloromethane solution placed in a 2 mm quartz cell under nitrogen atmosphere while it was stirred at room temperature.

### **Femtosecond to Nanosecond Transient Absorption Measurements**

Transient absorption measurements on the femtosecond to nanosecond time scale were conducted by a homemade pump-probe system. An amplified femtosecond laser, Spirit One 1040-8 (Spectra-Physics, 1040 nm, the pulse width:  $\sim$ 270 fs), was split into two beams with a ratio of 1:9. The stronger beam was directed a  $\beta$ -barium borate (BBO) crystal (Type I, cutting angle = 23.2 $^\circ$ ) to generate the second harmonic (520 nm) pulse. The fundamental and second harmonic pulses were separated by a dichroic mirror, and the 1040-nm beam passed through a half-wave plate to

align the polarization to parallel to the second harmonic pulse. After passing through a one-directional translational stage, the 1040-nm beam is directed to the BBO crystal (Type I, cutting angle = 32.1°). Alternatively, the 520-nm beam is also directed to the BBO crystal with appropriate time delay and phase matching angle to generate a third harmonic pulse (347 nm), which was used as a pump beam. The pump beam was chopped prior to the sample at 500 Hz for signal differencing. The other weaker beam was focused to a deuterated water placed in a 10-mm quartz cuvette to generate the white light continuum for the probe beam. Both pump and probe beams were focused to the sample solution placed in the 2-mm quartz cuvette. The polarization between the pump and probe pulses was set to the magic angle. The transmitted probe beam was detected with multichannel detection system, PK120-C-RK (UNISOKU), composed of a CMOS linear image sensor and a polychromator. The obtained spectra were calibrated for group velocity dispersion using the data obtained by the optical Kerr signal of CH<sub>2</sub>Cl<sub>2</sub> between the pump pulse and the white-light continuum. The instrumental response function was shorter than approximately 300 fs. The sample solutions were stirred with a stirrer during the experiments. The measurements were performed at room temperature.

### **Picosecond Time-Resolved IR Absorption Measurements**

The fundamental output from a Ti:sapphire regenerative amplifier (Solstice Ace, Spectra Physics, wavelength = 800 nm, repetition rate = 1 kHz, pulse duration = 150 fs) was used to excite two optical parametric amplifiers (TOPAS-C and TOPAS-prime, Light Conversion) and generate a pump UV pulse (wavelength = 355 nm, energy at the sample point = 1 μJ pulse<sup>-1</sup>) and probe IR pulse (spectral coverage = 1360–1700 cm<sup>-1</sup>, <0.4 μJ pulse<sup>-1</sup>). The pump UV pulse was modulated at half of the repetition rate by a mechanical chopper and focused onto the sample noncollinearly against the probe pulse. The probe IR pulse was passed through the photoexcited sample and detected with a 19 cm spectrograph (TRIAX190, HORIBA JOBIN YVON), a multichannel liquid-nitrogen-cooled HgCdTe detector array, and box-car integrators (IR-12-128, InfraRed Associates). The cross-correlation between the pump and probe pulses was estimated to be ~0.5 ps. To remove the artificial signal that appears in transient IR spectra for all time delays, the spectrum at -400 ps, when the probe pulse comes before the pump pulse, was subtracted from all transient IR spectra. [Ir(μ-Cl)(PIC)<sub>2</sub>]<sub>2</sub> and [Ir(μ-Cl)(tBu-PIC)<sub>2</sub>]<sub>2</sub>, in a CD<sub>2</sub>Cl<sub>2</sub> solution, was filled into a CaF<sub>2</sub> cell (optical path length = 200 μm) and was measured. The accumulation time was 1 h for each time delay and, in total, 18 h for all time delays. Because the sample stage was moved right and left (velocity = 1 mm s<sup>-1</sup>) during the measurement, the transient and steady-state IR spectra of the sample were not changed, even after the experiment was run for 18 h.



#### 4. HR-ESI-TOF-MS Spectra

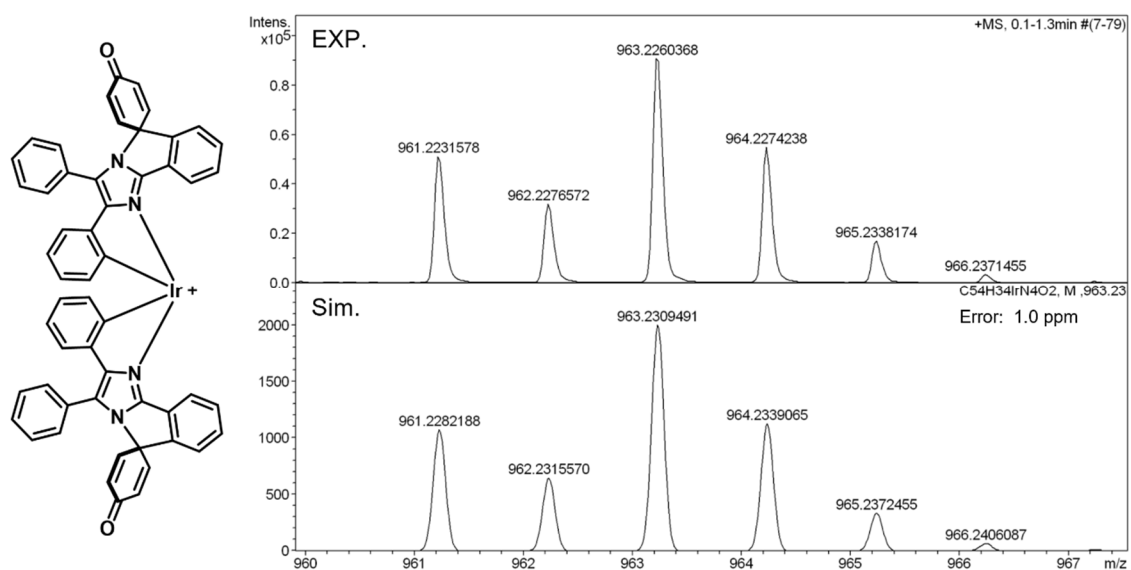

Fig. S3 HR-ESI-TOF-MS of  $[\text{Ir}(\mu\text{-Cl})(\text{PIC})_2]_2$ .

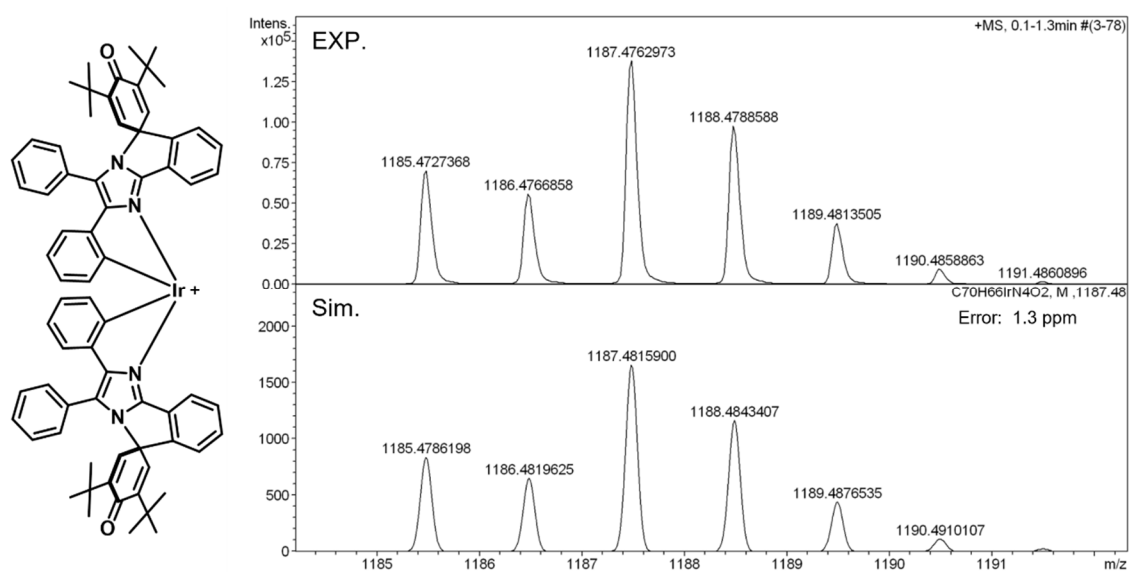

Fig. S4 HR-ESI-TOF-MS of  $[\text{Ir}(\mu\text{-Cl})(\text{tBu-PIC})_2]_2$ .

## 5. X-ray crystallographic Analyses

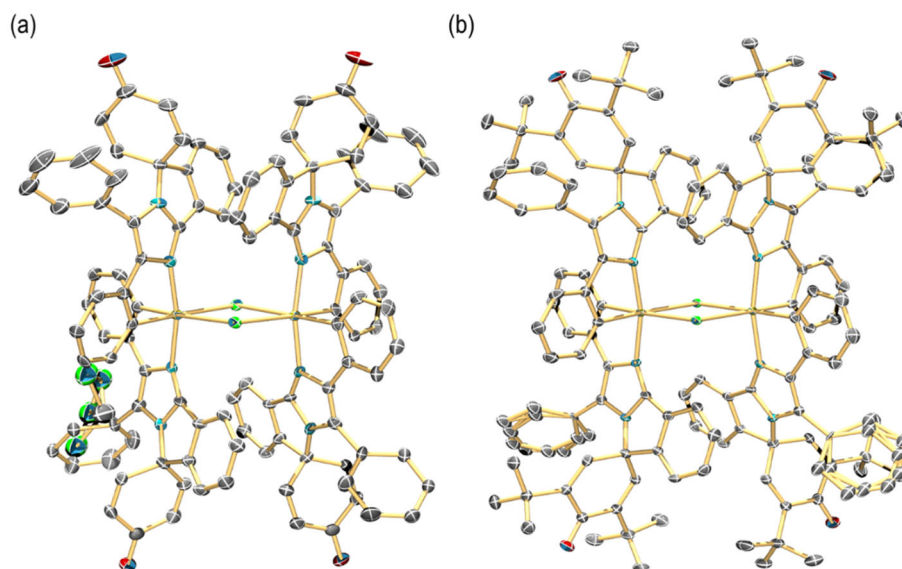

**Fig. S5** X-ray crystal structure (ORTEP view, 50% probability) of (a)  $[\text{Ir}(\mu\text{-Cl})(\text{PIC})_2]_2$  and (b)  $[\text{Ir}(\mu\text{-Cl})(\text{tBu-PIC})_2]_2$ , where nitrogen, oxygen, iridium and chlorine atoms are highlighted in blue, red, yellow and green respectively. Hydrogen atoms are omitted for clarity.

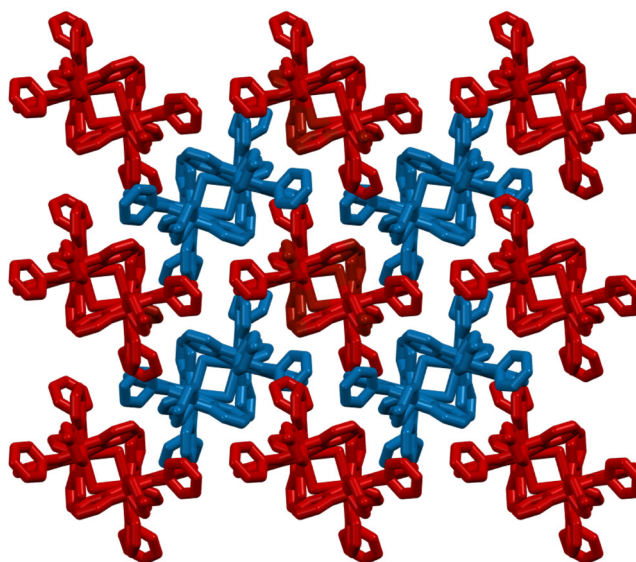

**Fig. S6** Crystal packing diagrams of the crystal structures of  $\Delta\Delta\text{-}[\text{Ir}(\mu\text{-Cl})(\text{PIC})_2]_2$  (red) and  $\Lambda\Lambda\text{-}[\text{Ir}(\mu\text{-Cl})(\text{PIC})_2]_2$  (blue). Hydrogen atoms are omitted for clarity.



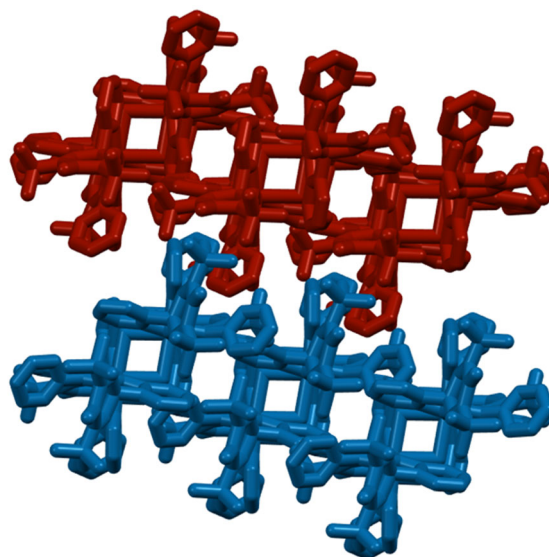

**Fig. S7** Crystal packing diagrams of the crystal structures of  $\Delta\Delta$ - $[\text{Ir}(\mu\text{-Cl})(\text{tBu-PIC})_2]_2$  (red) and  $\Lambda\Lambda$ - $[\text{Ir}(\mu\text{-Cl})(\text{tBu-PIC})_2]_2$  (blue). Hydrogen atoms are omitted for clarity. One of the disordered structures was shown for clarity.

**Table S1.** Crystallographic Parameters of  $[\text{Ir}(\mu\text{-Cl})(\text{PIC})_2]_2$  and  $[\text{Ir}(\mu\text{-Cl})(\text{tBu-PIC})_2]_2$ .

|                                             | $[\text{Ir}(\mu\text{-Cl})(\text{PIC})_2]_2$                            | $[\text{Ir}(\mu\text{-Cl})(\text{tBu-PIC})_2]_2$                         |
|---------------------------------------------|-------------------------------------------------------------------------|--------------------------------------------------------------------------|
| Formula sum                                 | $\text{C}_{108}\text{H}_{68}\text{Cl}_2\text{Ir}_2\text{N}_8\text{O}_4$ | $\text{C}_{140}\text{H}_{132}\text{Cl}_2\text{Ir}_2\text{N}_8\text{O}_4$ |
| Formula weight                              | 1997.4                                                                  | 2445.9                                                                   |
| Crystal system                              | Orthorhombic                                                            | Orthorhombic                                                             |
| Space group                                 | Fdd2                                                                    | C2/c                                                                     |
| $a$ (Å)                                     | 26.0785(8)                                                              | 15.7423(3)                                                               |
| $b$ (Å)                                     | 31.5718(8)                                                              | 38.0032(8)                                                               |
| $c$ (Å)                                     | 22.0025(7)                                                              | 24.3288(5)                                                               |
| $\alpha$ (deg)                              | 90                                                                      | 90                                                                       |
| $\beta$ (deg)                               | 90                                                                      | 106.201                                                                  |
| $\gamma$ (deg)                              | 90                                                                      | 90                                                                       |
| $V$ (Å <sup>3</sup> )                       | 18115.7(9)                                                              | 13976.9(5)                                                               |
| $T$ (K)                                     | 90                                                                      | 90                                                                       |
| $Z$                                         | 8                                                                       | 4                                                                        |
| $F_{000}$                                   | 8576.2                                                                  | 4992.0                                                                   |
| $\rho_{\text{calcd}}$ (g cm <sup>-3</sup> ) | 1.586                                                                   | 1.162                                                                    |
| $R_1$ [ $I > 2s(I)$ ]                       | 0.0243                                                                  | 0.0209                                                                   |
| w $R_2$ [ $I > 2s(I)$ ]                     | 0.0806                                                                  | 0.0876                                                                   |

## 6. Nanosecond to Microsecond Transient Absorption Measurements

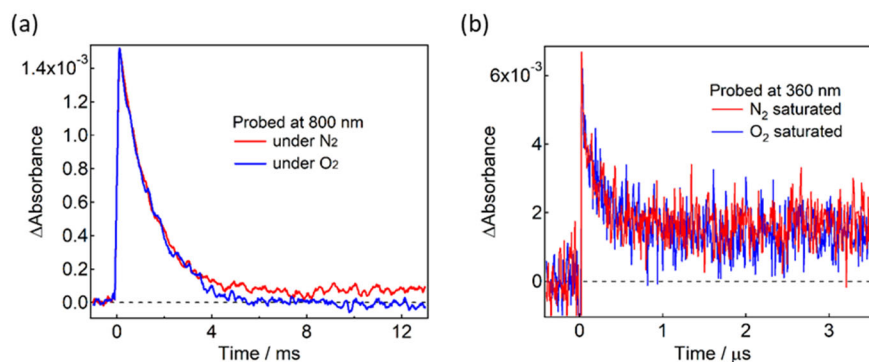

**Fig. S8** Transient absorption dynamics of  $[\text{Ir}(\mu\text{-Cl})(\text{PIC})_2]_2$  in dichloromethane ( $2.4 \times 10^{-5}$  M) at room temperature on (a) millisecond and (b) microsecond timescales excited with a 355-nm nanosecond laser pulse ( $1.0 \text{ mJ pulse}^{-1}$ ) under nitrogen and oxygen atmosphere.

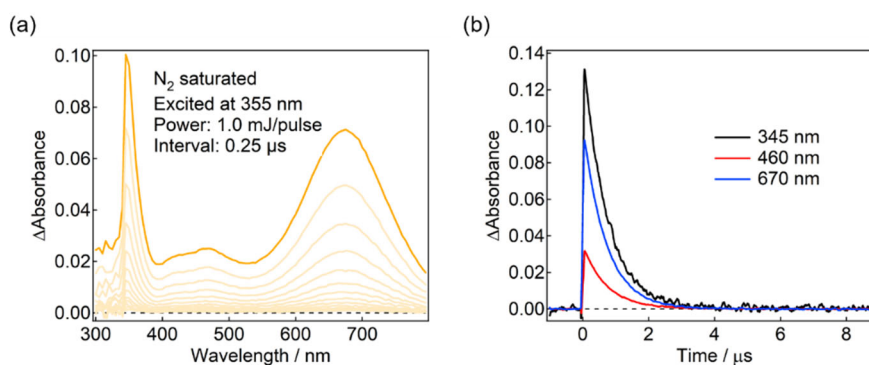

**Fig. S9** (a) Nanosecond to microsecond transient absorption spectra and (b) dynamics of **PIC** in dichloromethane ( $7.1 \times 10^{-4}$  M) excited with a 355-nm nanosecond laser pulse ( $1.0 \text{ mJ pulse}^{-1}$ ) under nitrogen atmosphere at room temperature.

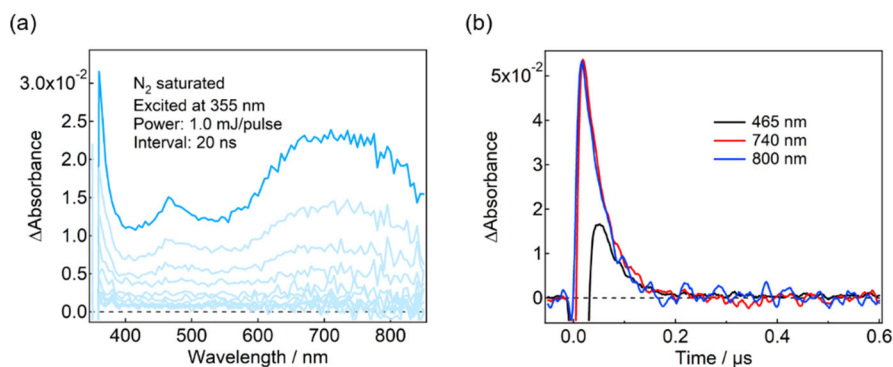

**Fig. S10** (a) Nanosecond to microsecond transient absorption spectra and (b) dynamics of **tBu-PIC** in dichloromethane ( $1.1 \times 10^{-3}$  M) excited with a 355-nm nanosecond laser pulse ( $1.0 \text{ mJ pulse}^{-1}$ ) under nitrogen atmosphere at room temperature.

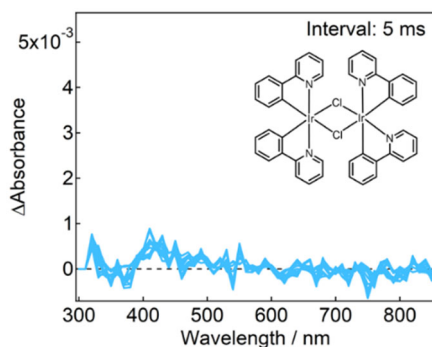

**Fig. S11** Transient absorption spectra of **[Ir( $\mu$ -Cl)(2-phenylpyridine) $_2$ ] $_2$**  in dichloromethane ( $4.5 \times 10^{-5}$  M) at millisecond time scales excited with a 355-nm nanosecond laser pulse ( $1.0 \text{ mJ pulse}^{-1}$ ) under nitrogen atmosphere at room temperature.

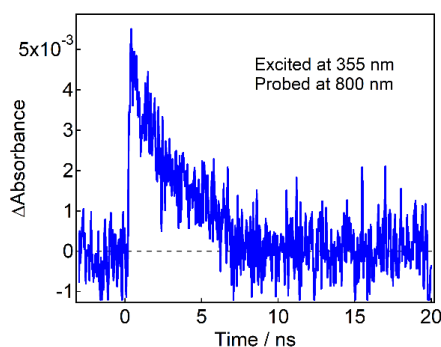

**Fig. S12** Transient absorption dynamics of **[Ir( $\mu$ -Cl)(tBu-PIC) $_2$ ] $_2$**  in dichloromethane ( $1.2 \times 10^{-4}$  M) excited at 355-nm picosecond laser pulse ( $3.4 \text{ mJ pulse}^{-1}$ ) under nitrogen atmosphere at room temperature.

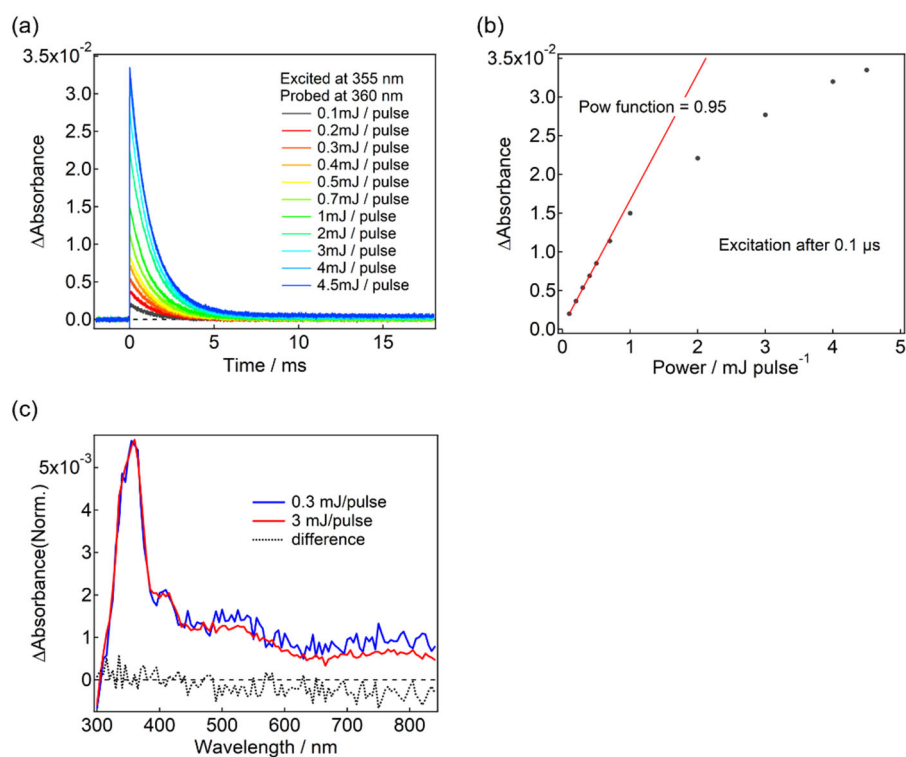

**Fig. S13** (a) Transient absorption dynamics of  $[\text{Ir}(\mu\text{-Cl})(\text{PIC})_2]_2$  in dichloromethane ( $2.6 \times 10^{-5} \text{ M}$ ) excited with a 355-nm nanosecond laser pulse with different power under nitrogen atmosphere at room temperature. (b) Plots of excitation light intensity vs.  $\Delta\text{Absorbance}$  of  $[\text{Ir}(\mu\text{-Cl})(\text{PIC})_2]_2$  after 1  $\mu\text{s}$  of excitation. (c) Normalized transient absorption spectra of  $[\text{Ir}(\mu\text{-Cl})(\text{PIC})_2]_2$  in dichloromethane ( $1.0 \times 10^{-5} \text{ M}$ ) excited with a 355-nm nanosecond laser pulse (0.3 mJ pulse $^{-1}$  (blue) and 3.0 mJ pulse $^{-1}$  (red)) under nitrogen atmosphere at room temperature.

## 7. Kinetics for the Ring-Closing Reaction

**Table S2.** First-order rate constants for the ring-closing reaction of  $[\text{Ir}(\mu\text{-Cl})(\text{PIC})_2]_2$ .

| T / K | k / s <sup>-1</sup> |
|-------|---------------------|
| 273   | $1.4 \times 10^2$   |
| 283   | $2.6 \times 10^2$   |
| 293   | $6.2 \times 10^2$   |
| 298   | $8.2 \times 10^2$   |
| 303   | $14 \times 10^3$    |

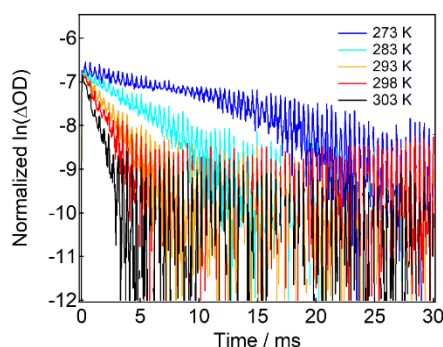

**Fig. S14** First-order kinetic plots of  $[\text{Ir}(\mu\text{-Cl})(\text{PIC})_2]_2$  monitored at 350 nm in dichloromethane ( $3.1 \times 10^{-5}$  M).

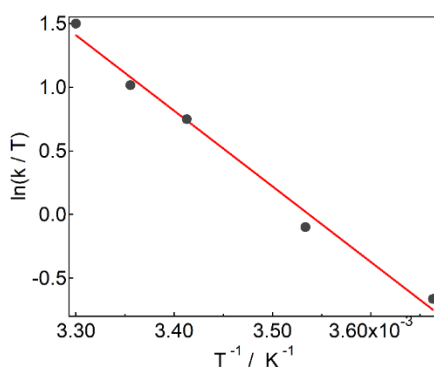

**Fig. S15** Eyring plots for the ring-closing reaction of  $[\text{Ir}(\mu\text{-Cl})(\text{PIC})_2]_2$  in dichloromethane ( $3.1 \times 10^{-5}$  M).

**Table S3.** Activation parameters for the open-ring isomers of **PIC** in benzene and  $[\text{Ir}(\mu\text{-Cl})(\text{PIC})_2]_2$  in dichloromethane at 298 K.<sup>S1</sup> Activation enthalpy reflects the change in the thermodynamic stability of the molecule and chemical bonds between the open-ring isomer and the transition state, while activation entropy reflects the change in the molecular structure and environments. The differences in the thermodynamic parameters of  $[\text{Ir}(\mu\text{-Cl})(\text{PIC})_2]_2$  and **PIC** are most probably derived from the coordination bonds between **PIC** and the  $\text{Ir}^{3+}$  ion. The larger magnitude of the activation entropy may

indicate the steric hindrance by the coordination bonds, *i.e.*, the larger change in the nuclear coordination is necessary for the thermal back reaction. The increase in the activation enthalpy may indicate the interaction between the open-ring isomer and the Ir<sup>3+</sup> ion.

|                                                  | $\Delta G^\ddagger$<br>kJ mol <sup>-1</sup> | $\Delta H^\ddagger$<br>kJ mol <sup>-1</sup> | $\Delta S^\ddagger$<br>J mol <sup>-1</sup> K <sup>-1</sup> |
|--------------------------------------------------|---------------------------------------------|---------------------------------------------|------------------------------------------------------------|
| PIC                                              | 36.2                                        | 31.7                                        | -14.9                                                      |
| [Ir( $\mu$ -Cl)(PIC) <sub>2</sub> ] <sub>2</sub> | 56.2                                        | 49.4                                        | -22.7                                                      |

## 8. Subpicosecond-to-nanosecond transient absorption spectra

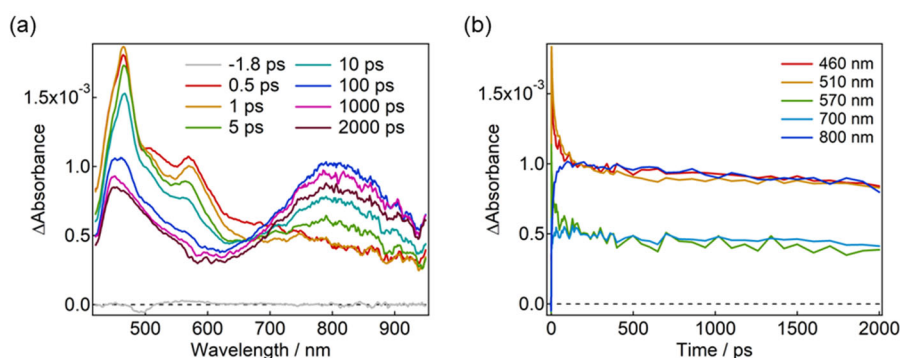

**Fig. S16** Femtosecond to nanosecond transient absorption (a) spectra and (b) dynamics of [Ir( $\mu$ -Cl)(PIC)<sub>2</sub>]<sub>2</sub> in dichloromethane ( $1.2 \times 10^{-4}$  M) excited at 347 nm ( $300 \text{ nJ pulse}^{-1}$ ) at room temperature.

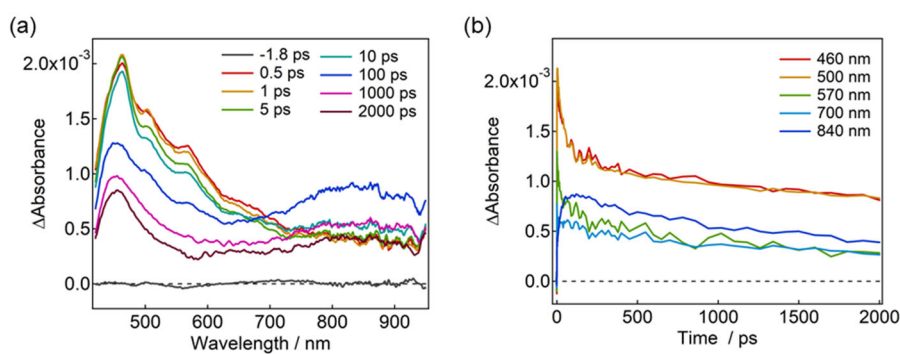

**Fig. S17** Femtosecond to nanosecond transient absorption (a) spectra and (b) dynamics of [Ir( $\mu$ -Cl)(tBu-PIC)<sub>2</sub>]<sub>2</sub> in dichloromethane ( $1.5 \times 10^{-4}$  M) excited at 347 nm ( $300 \text{ nJ pulse}^{-1}$ ) at room temperature.

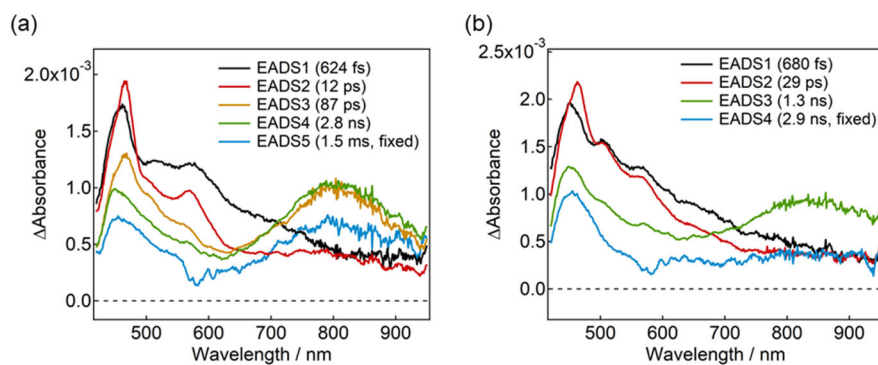

**Fig. S18** EADS of the transient absorption spectra of (a)  $[\text{Ir}(\mu\text{-Cl})(\text{PIC})_2]_2$  and (b)  $[\text{Ir}(\mu\text{-Cl})(\text{tBu-PIC})_2]_2$  in dichloromethane, respectively.

Global analyses with singular value decomposition (SVD) were performed to elucidate the excited state relaxation pathways.<sup>S5</sup> For  $[\text{Ir}(\mu\text{-Cl})(\text{PIC})_2]_2$  and  $[\text{Ir}(\mu\text{-Cl})(\text{tBu-PIC})_2]_2$ , the five-state and four-state sequential kinetic model was assumed to obtain the evolution-associated difference spectra (EADS), and the obtained EADS lifetimes of  $[\text{Ir}(\mu\text{-Cl})(\text{PIC})_2]_2$  and  $[\text{Ir}(\mu\text{-Cl})(\text{tBu-PIC})_2]_2$  were 624 fs, 12 ps, 87 ps, 2.8 ns and 1.5 ms (fixed) and 680 fs, 29 ps, 1.3 ns and 2.9 ns respectively. The first and second EADS of  $[\text{Ir}(\mu\text{-Cl})(\text{PIC})_2]_2$  (624 fs and 12 ps) reflect bond dissociation to the open-ring isomer. The third EADS (87 ps) is assigned to the structurally unrelaxed open-ring isomer, and the time constant reflects the geometrical relaxation of the open-ring isomer. The time constant of the fourth EADS (2.8 ns) may reflect the thermal back reaction from the open-ring isomer to the initial closed-ring isomer. The time constant concluded that EADS (1.5 ms, fixed) was assigned to the thermal back reaction of the open-ring isomer by flash photolysis. It is noted that it was difficult to obtain the exact time of the fourth EADS (2.8 ns) because of the limitation of the time delay of the experimental setup (up to 2 ns).

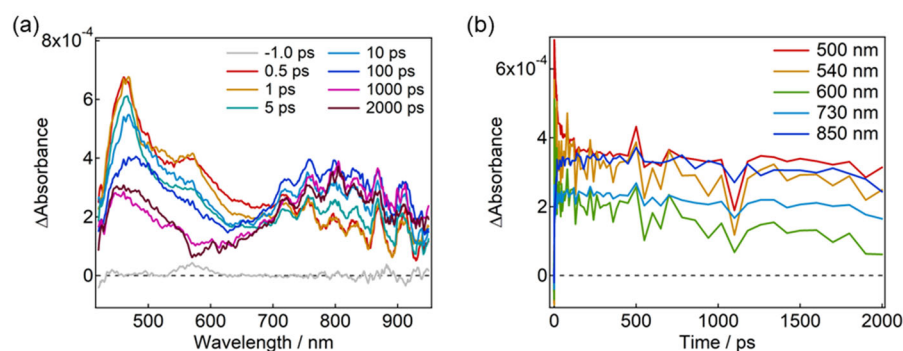

**Fig. S19** Femtosecond to nanosecond transient absorption (a) spectra and (b) dynamics of  $[\text{Ir}(\mu\text{-Cl})(\text{PIC})_2]_2$  in dichloromethane ( $4.5 \times 10^{-4}$  M) excited at 410 nm ( $34 \text{ nJ pulse}^{-1}$ ) at room temperature.

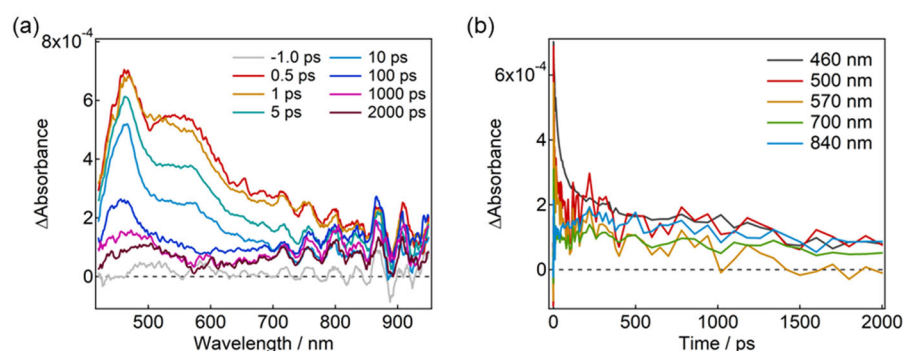

**Fig. S20** Femtosecond to nanosecond transient absorption (a) spectra and (b) dynamics of  $[\text{Ir}(\mu\text{-Cl})(\text{PIC})_2]_2$  in dichloromethane ( $3.8 \times 10^{-4}$  M) excited at 410 nm ( $34 \text{ nJ pulse}^{-1}$ ) at room temperature.



## 9. Time-resolved IR Spectra

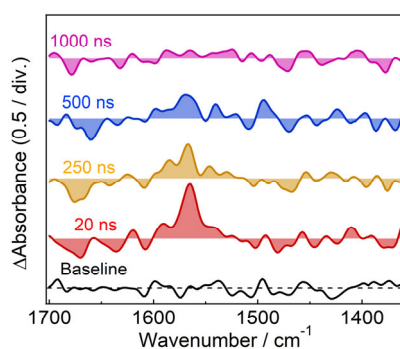

**Fig. S21** Nanosecond time-resolved IR spectra of PIC in CD<sub>2</sub>Cl<sub>2</sub> ( $\sim 5 \times 10^{-3}$  M) excited with a 355-nm nanosecond laser pulse at room temperature.

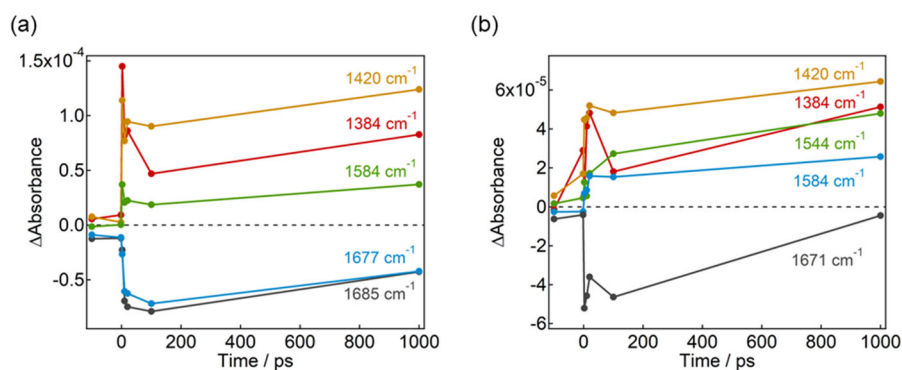

**Fig. S22** Picosecond time-resolved IR dynamics of (a) [Ir(μ-Cl)(PIC)<sub>2</sub>]<sub>2</sub> and (b) [Ir(μ-Cl)(tBu-PIC)<sub>2</sub>]<sub>2</sub> in CD<sub>2</sub>Cl<sub>2</sub> ( $\sim 5 \times 10^{-3}$  M) excited with a 355-nm femtosecond laser pulse at room temperature.

## 10. Detailed Discussion of the Decay of the Open-Ring Form

The transient absorption dynamics of  $[\text{Ir}(\mu\text{-Cl})(\text{PIC})_2]_2$  have three decay components consisting of nanoseconds, hundreds of nanoseconds, and millisecond timescales after the formation of the open-ring isomer (<100 ps). The origin of the decay is discussed based on the previous reports and simple calculations.

In **PIC** and **PIC** derivatives, the ultrafast bond dissociation processes have been revealed in detail by time-resolved visible and IR spectroscopies and advanced quantum chemical calculations.<sup>S6,S7</sup> After the C–N bond dissociation, a radical pair is generated at the imidazole and phenol moieties, and the spin-spin interaction between them gradually increases with the decrease in the dihedral angle between the two moieties by the reorganization. The generated open-ring isomer has two structural isomers whose biradical characters are different; these are called the biradical and quinoidal forms. The biradical form has two spin states, singlet and triplet biradicals. Transient species generated just after bond dissociation is weighted towards the singlet biradical form. The thermal equilibrium between the two forms (three species including the triplet biradical form) takes hundreds of picoseconds to nanoseconds. The energy gap between the singlet and triplet biradicals is usually very small, and these should exist as the thermal equilibrium. Temperature dependence of electron spin resonance spectroscopy of a **PIC** derivative (**PABI**) shows that the singlet biradical is the ground state in the biradical form.<sup>S8</sup> After the thermal equilibrium, the open-ring isomer decays single-exponentially on timescales of tens of nanoseconds to seconds depending on the molecular structures. The single exponential decay also suggests that the energy gap between singlet and triplet biradicals is small. On the other hand, in a **PIC** derivative whose spin-spin interaction between the imidazolyl and phenoxy radicals is relatively weak,<sup>S9</sup> the thermal equilibrium between the biradical and quinoidal forms are substantially decelerated and is observed in hundreds of nanoseconds, whereas the thermal back reaction occurs on millisecond timescales. Considering these previous results, the **PIC**-coordinated  $\text{Ir}^{3+}$  complex also exhibits similar dynamic properties after the bond breaking. Namely, at least the two decay components, the thermal equilibrium between biradical and quinoidal forms and the thermal back reactions to the close-ring isomer, are expected to be observed in the **PIC**-coordinated  $\text{Ir}^{3+}$  complexes.

The transient absorption dynamics of  $[\text{Ir}(\mu\text{-Cl})(\text{PIC})_2]_2$  have three decay components consisting of nanoseconds, hundreds of nanoseconds, and millisecond timescales after the formation of the open-ring isomer (<100 ps). The decay on millisecond timescales can be assigned to the thermal back reaction from the open-ring isomer (the thermal equilibrium between the biradical and quinoidal forms) to the close-ring isomer. The triplet biradical form would not be the origin of the millisecond transient species because the S-T gap of biradicals should be very small and cannot account for the millisecond decay. Time-resolved IR measurements show that the IR band at  $\sim 1550\text{ cm}^{-1}$  gradually increases on a timescale of hundreds of picoseconds to nanoseconds despite the gradual decrease in

the visible transient absorption signals associated with the open-ring isomer. This may indicate that the thermal equilibrium between the biradical and quinoidal forms occurs on hundreds of picoseconds to nanosecond timescales. However, it was difficult to dictate the origin of the decay on hundreds of nanosecond timescales. It may be originated from the fast thermal back reaction to the close-ring isomer due to the steric hindrance or electronic interaction by the Ir<sup>3+</sup> ion because the signal associated with the open-ring isomer of **[Ir( $\mu$ -Cl)(PIC)<sub>2</sub>]<sub>2</sub>** is substantially smaller than that of **PIC**.

The triplet excited state of the close-ring isomer can be excluded from the origin of these decays because the decay process from nanosecond to millisecond did not depend on the molecular oxygen at all (Fig. S8).

Moreover, the multiphoton process can be also excluded from our experiments by the following calculations. The characteristics of the excitation pulse are as below: wavelength = 347 nm, pulse duration = ~300 fs, intensity = 300 nJ/pulse, FWHM of the beam spot = 300  $\mu$ m (measured by the knife-edge method). Using these parameters, the number of photons per pulse can be calculated as  $5.2 \times 10^{11}$  photons pulse<sup>-1</sup>. The molar absorption coefficient of **[Ir( $\mu$ -Cl)(PIC)<sub>2</sub>]<sub>2</sub>** at the excitation wavelength (347 nm) is  $7.4 \times 10^4$  M<sup>-1</sup> cm<sup>-1</sup>. The molar absorption coefficient can be converted to the absorption cross section ( $1.2 \times 10^{-16}$  cm<sup>2</sup>). By multiplying the number of photons per pulse by the absorption cross section, we can estimate the number of photons supplied to one molecule under the excitation condition. The value is 0.08 photons/molecule, indicating that no nonlinear optical processes occur under the excitation condition. Therefore, we can safely exclude the effect of the multiphoton processes on the transient absorption dynamics.

## 10. DFT calculations

All calculations were carried out using the Gaussian 09 program (Revision D.01).<sup>S10</sup> The molecular structure was fully optimized at the B3LYP/6-31G[C H N O Cl]/LANL2DZ[Ir] level of theory, and the analytical second derivative was computed using vibrational analysis to confirm each stationary point to be a minimum. TDDFT calculations were performed at the B3LYP/6-31G[C H N O Cl]/LANL2DZ[Ir] level of the theory for the optimized structures.

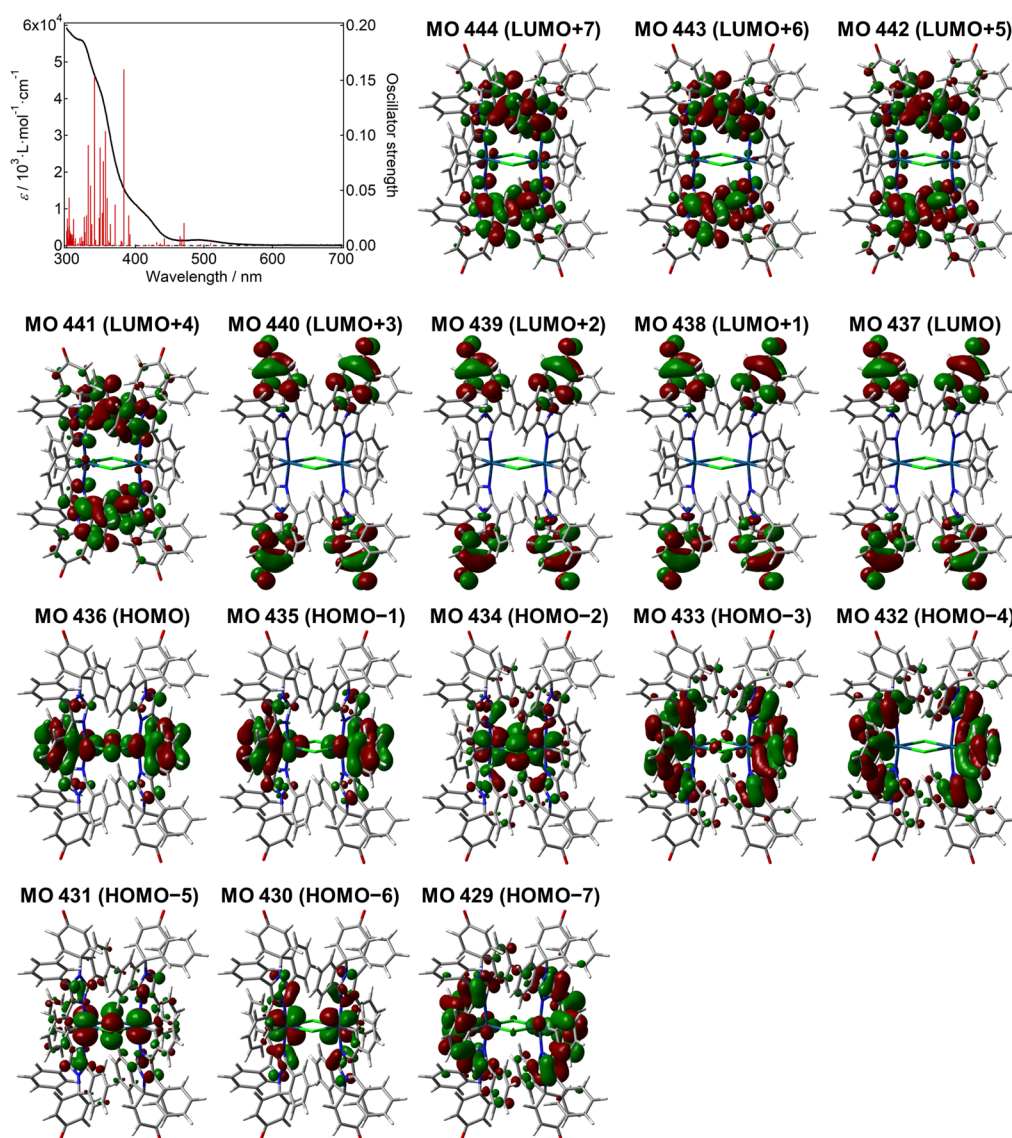

**Fig. S23** UV-vis absorption spectrum of  $[\text{Ir}(\mu\text{-Cl})(\text{PIC})_2]_2$  in dichloromethane at room temperature. The calculated absorption spectrum B3LYP/6-31G[C H N O Cl]/LANL2DZ[Ir]/ B3LYP/6-31G[C H N O Cl]/LANL2DZ[Ir] level of the theory is shown by the red vertical lines. The relevant molecular orbitals of the  $[\text{Ir}(\mu\text{-Cl})(\text{PIC})_2]_2$  calculated at the B3LYP/6-31G[C H N O Cl]/LANL2DZ[Ir] level of the theory.

**Table S4.** Selected calculated electronic transition of  $[[\text{Ir}(\mu\text{-Cl})(\text{PIC})_2]_2$  at the B3LYP/6-31G[C H N O Cl]/LANL2DZ[Ir] level.

| No. | Wavelength (nm) | Coefficients | Electronic Transition |   | $f$         |        |
|-----|-----------------|--------------|-----------------------|---|-------------|--------|
| 1   | 509.73          | 0.10020      | 429 HOMO-7            | → | 438 LUMO+1  | 0.0015 |
|     |                 | 0.11913      | 432 HOMO-4            | → | 439 LUMO+2  |        |
|     |                 | 0.12710      | 433 HOMO-3            | → | 437 LUMO    |        |
|     |                 | 0.66854      | 434 HOMO-2            | → | 437 LUMO    |        |
| 2   | 470.92          | -0.24741     | 435 HOMO-1            | → | 444 LUMO+7  | 0.0202 |
|     |                 | 0.65216      | 436 HOMO              | → | 442 LUMO+5  |        |
| 3   | 383.35          | -0.27963     | 434 HOMO-2            | → | 441 LUMO+4  | 0.1597 |
|     |                 | 0.11279      | 435 HOMO-2            | → | 444 LUMO+7  |        |
|     |                 | -0.37277     | 435 HOMO-1            | → | 445 LUMO+8  |        |
|     |                 | 0.44604      | 436 HOMO              | → | 446 LUMO+9  |        |
| 4   | 340.53          | -0.16327     | 436 HOMO              | → | 449 LUMO+12 | 0.1542 |
|     |                 | 0.63832      | 430 HOMO-6            | → | 443 LUMO+6  |        |
|     |                 | 0.15598      | 431 HOMO-5            | → | 444 LUMO+7  |        |
|     |                 | -0.10510     | 433 HOMO-3            | → | 441 LUMO+4  |        |

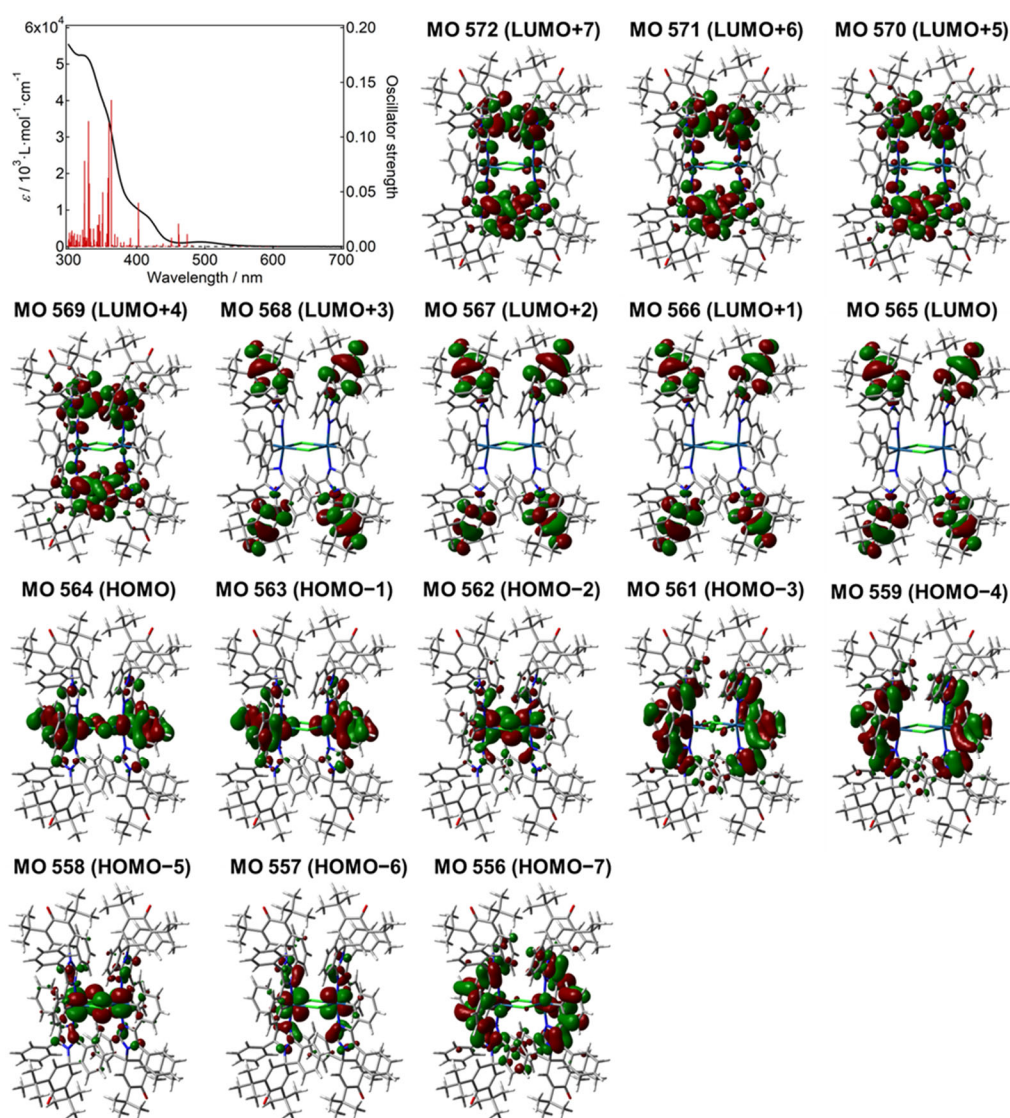

**Fig. S24** UV-vis absorption spectrum of  $[\text{Ir}(\mu\text{-Cl})(\text{tBu-PIC})_2]_2$  in dichloromethane at room temperature. The calculated absorption spectrum B3LYP/6-31G[C H N O Cl]/LANL2DZ[Ir]//B3LYP/6-31G[C H N O Cl]/LANL2DZ[Ir] level of the theory is shown by the red vertical lines. The relevant molecular orbitals of the  $[\text{Ir}(\mu\text{-Cl})(\text{tBu-PIC})_2]_2$  calculated at the B3LYP/6-31G[C H N O Cl]/LANL2DZ[Ir] level of the theory.

**Table S5.** Selected calculated electronic transition of  $[\text{Ir}(\mu\text{-Cl})(\text{tBu-PIC})_2]_2$  at the B3LYP/6-31G[C H N O Cl]/LANL2DZ[Ir] level.

| No. | Wavelength (nm) | Coefficients | Electronic Transition |   | $f$        |        |
|-----|-----------------|--------------|-----------------------|---|------------|--------|
| 1   | 580.23          | -0.23547     | 563 HOMO-1            | → | 566 LUMO+1 | 0.0001 |
|     |                 | -0.19623     | 563 HOMO-1            | → | 568 LUMO+3 |        |
|     |                 | 0.62616      | 564 HOMO              | → | 568 LUMO+3 |        |
| 2   | 474.01          | -0.10224     | 562 HOMO-2            | → | 566 LUMO+1 | 0.0111 |
|     |                 | 0.16194      | 563 HOMO-1            | → | 571 LUMO+6 |        |

|   |        |          |            |   |             |        |
|---|--------|----------|------------|---|-------------|--------|
|   |        | 0.67169  | 564 HOMO   | → | 569 LUMO+4  |        |
| 3 | 461.30 | -0.11730 | 562 HOMO-2 | → | 568 LUMO+3  | 0.0206 |
|   |        | -0.17249 | 563 HOMO-1 | → | 572 LUMO+7  |        |
|   |        | 0.66454  | 564 HOMO   | → | 570 LUMO+5  |        |
|   |        | 0.15791  | 557 HOMO-7 | → | 565 LUMO    |        |
| 4 | 402.58 | -0.30972 | 558 HOMO-6 | → | 567 LUMO+2  | 0.0398 |
|   |        | 0.57230  | 562 HOMO-2 | → | 569 LUMO+4  |        |
|   |        | 0.45082  | 560 HOMO-4 | → | 571 LUMO+6  |        |
| 5 | 362.96 | 0.18492  | 560 HOMO-4 | → | 572 LUMO+7  | 0.1337 |
|   |        | -0.14183 | 561 HOMO-3 | → | 569 LUMO+4  |        |
|   |        | 0.11243  | 561 HOMO-3 | → | 570 LUMO+5  |        |
|   |        | -0.27002 | 563 HOMO-1 | → | 573 LUMO+8  |        |
|   |        | -0.26009 | 564 HOMO   | → | 574 LUMO+9  |        |
|   |        | -0.13465 | 564 HOMO   | → | 578 LUMO+13 |        |
|   |        | -0.25936 | 555 HOMO-9 | → | 569 LUMO+4  |        |
| 6 | 329.55 | -0.10067 | 555 HOMO-9 | → | 570 LUMO+5  | 0.1143 |
|   |        | -0.11312 | 556 HOMO-8 | → | 569 LUMO+4  |        |
|   |        | 0.47990  | 557 HOMO-7 | → | 571 LUMO+6  |        |
|   |        | -0.11945 | 558 HOMO-6 | → | 570 LUMO+5  |        |
|   |        | -0.10637 | 559 HOMO-5 | → | 572 LUMO+7  |        |
|   |        | 0.13643  | 563 HOMO-1 | → | 577 LUMO+12 |        |
|   |        | 0.11132  | 563 HOMO-1 | → | 581 LUMO+16 |        |
|   |        | 0.17347  | 564 HOMO   | → | 582 LUMO+17 |        |
|   |        | -0.15252 | 564 HOMO   | → | 583 LUMO+18 |        |

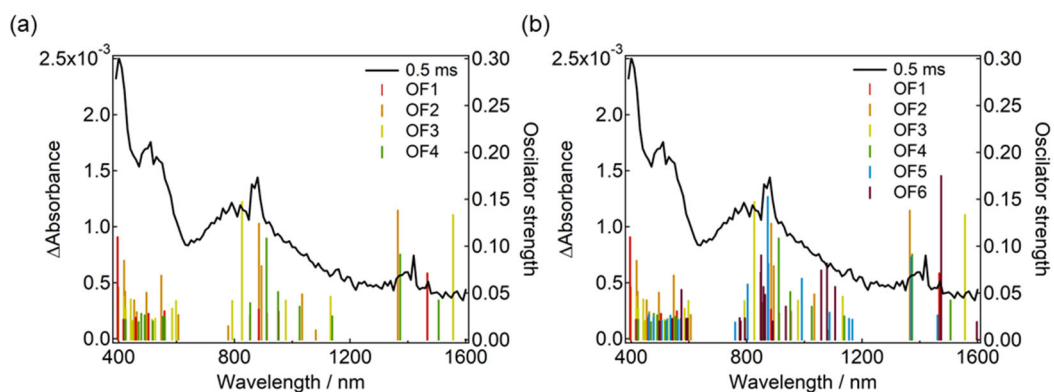

**Fig. S25** Transient absorption spectra of  $[\text{Ir}(\mu\text{-Cl})(\text{tBu-PIC})_2]_2$  at 0.5 ms (black line) after excitation in dichloromethane at room temperature. Vertical lines indicate the theoretical spectra of (a) open-ring isomers (OF1–OF4) and (b) open-ring isomers (OF1–OF6) (UB3LYP/6-31G[C H N O Cl]/LANL2DZ[Ir]/ UB3LYP/6-31G[C H N O Cl]/LANL2DZ[Ir] level of the theory).

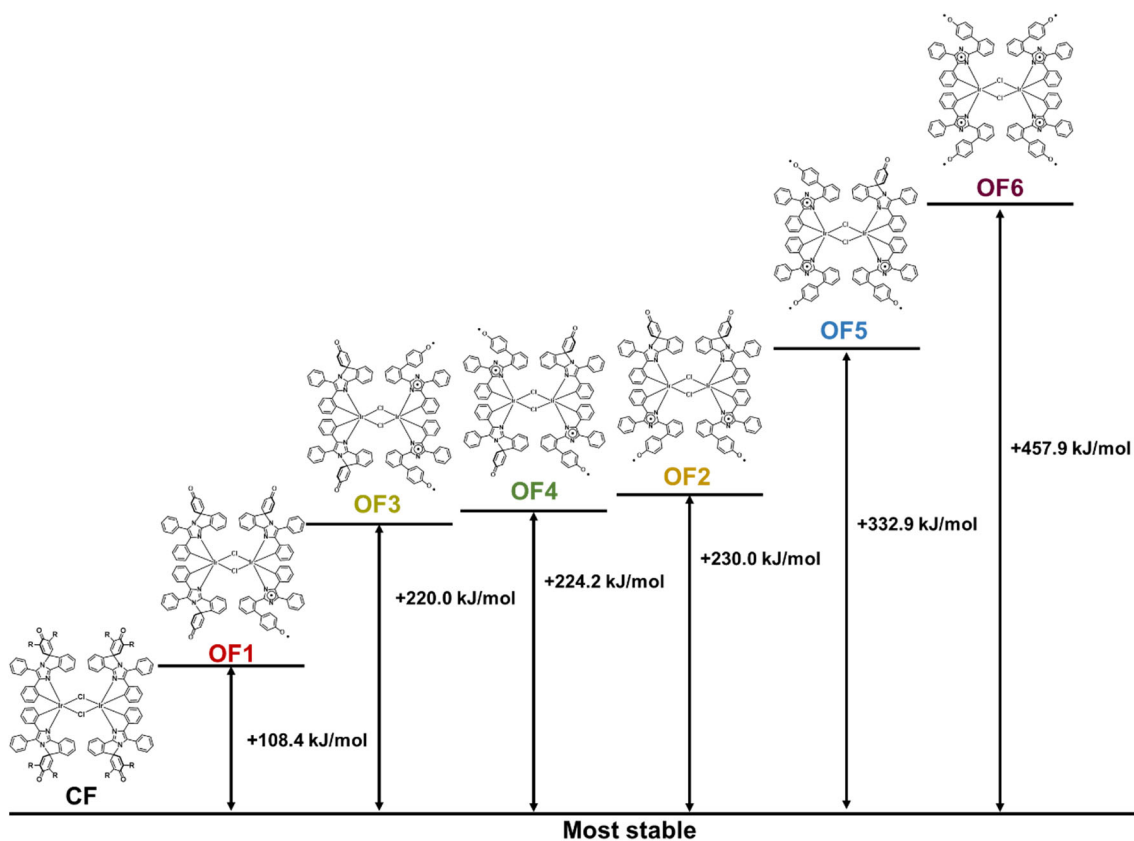

**Fig. S26** Relative energy of closed-ring isomer and the possible open-ring isomers of  $[\text{Ir}(\mu\text{-Cl})(\text{PIC})_2]_2$  calculated at the UB3LYP/6-31G[C H N O Cl]/LANL2DZ[Ir] level of the theory.



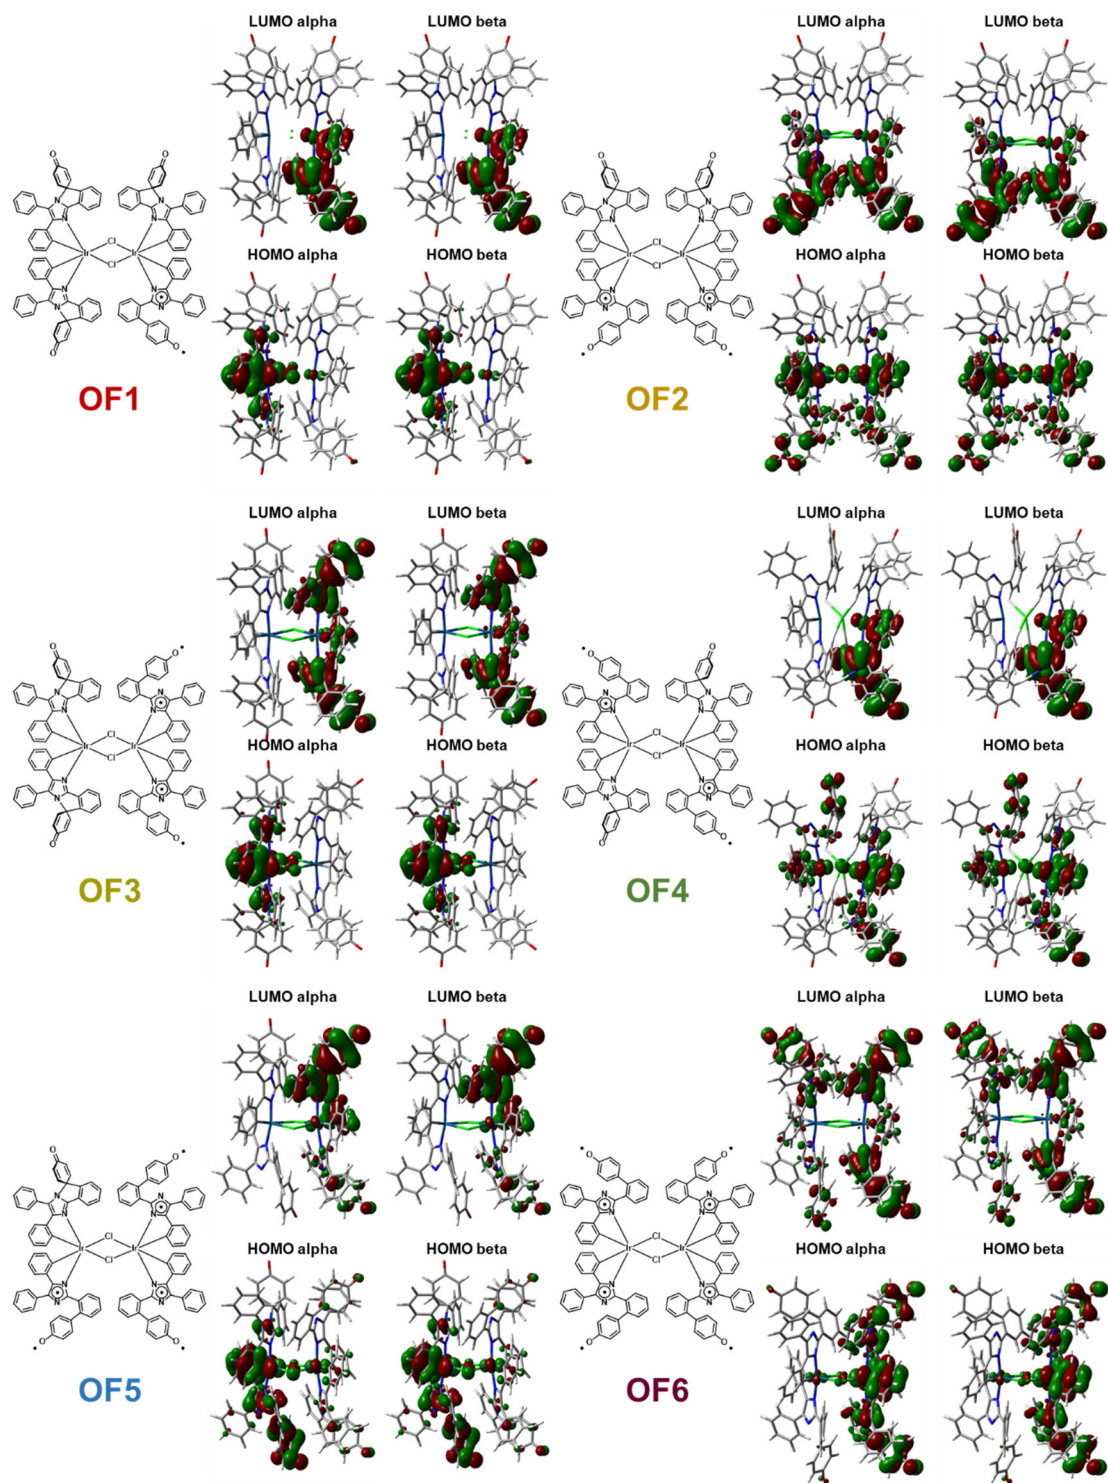

**Fig. S27** The relevant molecular orbitals of the possible open-ring isomers of  $[\text{Ir}(\mu\text{-Cl})(\text{PIC})_2]_2$  calculated at UB3LYP/6-31G[C H N O Cl]/LANL2DZ[Ir] level of the theory.

**Table S6.** Standard orientation of the optimized geometry for the closed-ring isomer of **[Ir( $\mu$ -Cl)(PIC)<sub>2</sub>]<sub>2</sub>.**

| Symbol | Coordinates |          |          | Symbol | X        | Y        | Z        |
|--------|-------------|----------|----------|--------|----------|----------|----------|
|        | X           | Y        | Z        |        |          |          |          |
| Ir     | 0.002235    | 2.10252  | 0.001335 | C      | 6.859687 | 4.853046 | -0.97381 |
| C      | 0.068166    | 3.458041 | -1.50045 | C      | 8.059962 | 4.238091 | -0.32831 |
| C      | 6.71318     | 2.338744 | 0.45859  | C      | -4.47858 | 4.400378 | -2.31691 |
| C      | -6.70784    | 2.344271 | -0.46047 | C      | 5.450308 | 0.5477   | -3.51354 |
| N      | -4.23999    | 2.745517 | -0.4116  | C      | 4.48556  | 4.398668 | 2.315913 |
| Cl     | 0.00065     | -1.3E-05 | 1.68163  | C      | -0.10085 | 5.108673 | -3.81717 |
| C      | -3.80899    | 1.411108 | 1.415913 | C      | -1.12442 | 4.862126 | 3.208662 |
| N      | -2.05671    | 2.325491 | -0.35133 | C      | 0.109187 | 5.102725 | 3.824272 |
| N      | 2.061597    | 2.323194 | 0.353796 | C      | -5.44915 | 0.550245 | 3.51292  |
| N      | 4.24527     | 2.741599 | 0.413029 | C      | -8.05406 | 4.244458 | 0.325748 |
| O      | 9.187823    | 4.781184 | -0.44007 | C      | -1.25921 | 4.559541 | -3.26638 |
| O      | -9.18119    | 4.789727 | 0.434397 | C      | 1.267023 | 4.554407 | 3.271606 |
| C      | -3.23445    | 2.049572 | 0.2368   | C      | 8.753344 | 1.21242  | 2.106287 |
| C      | -5.16768    | 1.809333 | 1.489033 | C      | 10.28619 | 2.098297 | 0.328288 |
| C      | -2.33145    | 3.227218 | -1.40758 | C      | 4.349638 | 5.79554  | 2.19636  |
| C      | 1.188529    | 3.761046 | 2.113816 | C      | 5.360843 | 3.881287 | 3.288719 |
| C      | 3.238842    | 2.04656  | -0.23502 | C      | -6.98626 | 6.238726 | 1.650612 |
| C      | -5.52499    | 2.798581 | 0.349017 | C      | -5.34395 | 3.880218 | -3.2971  |
| C      | 2.337512    | 3.224766 | 1.409842 | C      | 9.584617 | 3.568476 | 2.278588 |
| C      | 1.211506    | 4.056147 | -2.06173 | C      | -10.2805 | 2.104679 | -0.33768 |
| C      | -1.18172    | 3.763925 | -2.11007 | C      | -7.50235 | 7.284991 | 0.62254  |
| C      | 5.170846    | 1.806231 | -1.48903 | C      | 5.950797 | 6.128284 | 3.98738  |
| C      | 3.812032    | 1.40865  | -1.41506 | C      | 5.077269 | 6.653158 | 3.026729 |
| C      | 5.529585    | 2.794813 | -0.34894 | C      | -9.108   | 2.478372 | -1.28902 |
| C      | 3.274533    | 0.574966 | -2.40025 | C      | 6.992107 | 6.235228 | -1.64848 |
| C      | -1.20472    | 4.053642 | 2.06791  | C      | 6.088569 | 4.741456 | 4.118136 |
| C      | 5.993208    | 1.385859 | -2.52526 | C      | 5.628779 | 6.735043 | -2.18311 |
| C      | -3.27255    | 0.57684  | 2.401203 | C      | -4.35111 | 5.797609 | -2.19348 |
| C      | -4.1061     | 0.153657 | 3.446047 | C      | -7.97037 | 6.149135 | 2.851893 |
| C      | -5.69229    | 4.174775 | 0.947937 | C      | -8.74426 | 1.223254 | -2.11469 |
| C      | -0.0619     | 3.456287 | 1.504728 | C      | -9.57553 | 3.579971 | -2.2834  |
| C      | 5.696942    | 4.171519 | -0.94642 | C      | -5.62325 | 6.735614 | 2.18832  |
| C      | 7.904434    | 2.976937 | 0.469232 | C      | 7.974064 | 6.145905 | -2.8515  |
| C      | 1.132246    | 4.86665  | -3.20112 | C      | 7.512048 | 7.279052 | -0.61957 |
| C      | -3.69221    | 3.501761 | -1.44548 | C      | -5.07734 | 6.653045 | -3.02738 |
| C      | -5.99091    | 1.389169 | 2.524646 | C      | -6.07022 | 4.738164 | -4.13012 |
| C      | 3.698549    | 3.49833  | 1.447121 | C      | -5.94087 | 6.125477 | -3.9955  |
| C      | 9.115255    | 2.46938  | 1.282588 | Ir     | -0.00245 | -2.10149 | 0.000216 |
| C      | -7.89826    | 2.983955 | -0.47287 | C      | 0.061418 | -3.45588 | 1.503049 |
| C      | 4.107103    | 0.151792 | -3.44586 | C      | 6.70686  | -2.34606 | -0.46124 |
| C      | -6.85439    | 4.857349 | 0.974293 | C      | -6.7135  | -2.33959 | 0.458231 |
|        |             |          |          | N      | -4.24557 | -2.74054 | 0.411569 |
|        |             |          |          | Cl     | 0.000423 | 0.000928 | -1.68069 |

|   |          |          |          |   |          |          |          |
|---|----------|----------|----------|---|----------|----------|----------|
| C | -3.81288 | -1.40769 | -1.41658 | C | 1.259846 | -4.56021 | -3.2662  |
| N | -2.06197 | -2.32156 | 0.352482 | C | 8.741908 | -1.23154 | -2.12314 |
| N | 2.056535 | -2.32508 | -0.35186 | C | 10.28096 | -2.11046 | -0.34703 |
| N | 4.239448 | -2.74679 | -0.41012 | C | 4.352832 | -5.79936 | -2.18866 |
| O | 9.180833 | -4.78869 | 0.438725 | C | 5.342521 | -3.88293 | -3.29678 |
| O | -9.18628 | -4.78426 | -0.44027 | C | -6.9898  | -6.23564 | -1.64992 |
| C | -3.23927 | -2.0454  | -0.23656 | C | -5.35282 | -3.87553 | 3.295746 |
| C | -5.17159 | -1.80578 | -1.49046 | C | 9.5686   | -3.59023 | -2.28639 |
| C | -2.3379  | -3.22302 | 1.408705 | C | -10.2873 | -2.10245 | 0.334252 |
| C | 1.181901 | -3.764   | -2.11033 | C | -7.5074  | -7.28017 | -0.62056 |
| C | 3.234015 | -2.04971 | 0.237029 | C | 5.941546 | -6.12879 | -3.99132 |
| C | -5.52992 | -2.79415 | -0.35022 | C | 5.079397 | -6.65554 | -3.02154 |
| C | 2.331447 | -3.22756 | -1.40737 | C | -9.11432 | -2.47444 | 1.285638 |
| C | 1.204018 | -4.05419 | 2.065627 | C | 6.9866   | -6.23618 | 1.657758 |
| C | -1.18905 | -3.76036 | 2.112094 | C | 6.069208 | -4.74158 | -4.12869 |
| C | 5.167466 | -1.80677 | 1.488252 | C | 5.624525 | -6.73167 | 2.199308 |
| C | 3.808565 | -1.4092  | 1.414976 | C | -4.358   | -5.79248 | 2.19311  |
| C | 5.524587 | -2.79835 | 0.350317 | C | -7.9726  | -6.14775 | -2.85238 |
| C | 3.272182 | -0.57319 | 2.39879  | C | -8.7521  | -1.21875 | 2.111176 |
| C | -1.21155 | -4.05443 | -2.06389 | C | -9.58076 | -3.57618 | 2.280334 |
| C | 5.990955 | -1.38405 | 2.522608 | C | -5.6262  | -6.73348 | -2.18537 |
| C | -3.27563 | -0.57434 | -2.4022  | C | 7.973204 | -6.14426 | 2.856797 |
| C | -4.10834 | -0.15187 | -3.44799 | C | 7.500554 | -7.28484 | 0.630921 |
| C | -5.6964  | -4.17092 | -0.948   | C | -5.08521 | -6.64825 | 3.025787 |
| C | -0.06826 | -3.45697 | -1.50177 | C | -6.0799  | -4.73383 | 4.127692 |
| C | 5.692023 | -4.17343 | 0.951853 | C | -5.95007 | -6.12108 | 3.992945 |
| C | 7.896877 | -2.98644 | -0.47395 | H | 6.837316 | 7.343219 | 0.242495 |
| C | 1.123457 | -4.86365 | 3.205665 | H | 8.511325 | 7.021098 | -0.26544 |
| C | -3.69886 | -3.49655 | 1.446078 | H | 7.554754 | 8.267352 | -1.09297 |
| C | -5.99404 | -1.38621 | -2.52695 | H | 8.970682 | 5.846546 | -2.52397 |
| C | 3.692131 | -3.5028  | -1.4443  | H | 7.61174  | 5.425018 | -3.59476 |
| C | 9.105384 | -2.48476 | -1.29438 | H | 8.044613 | 7.12599  | -3.33895 |
| C | -7.90395 | -2.97924 | 0.469719 | H | 5.763615 | 7.723875 | -2.63411 |
| C | 4.106026 | -0.14743 | 3.44235  | H | 5.222341 | 6.07321  | -2.95719 |
| C | -6.85858 | -4.85337 | -0.97535 | H | 4.886065 | 6.833507 | -1.38259 |
| C | 6.854032 | -4.85625 | 0.978575 | H | 7.945635 | 1.410758 | 2.820198 |
| C | 8.053269 | -4.24481 | 0.327865 | H | 8.44996  | 0.374951 | 1.467773 |
| C | -4.486   | -4.39527 | 2.316623 | H | 9.633068 | 0.89379  | 2.675975 |
| C | 5.449265 | -0.54332 | 3.509411 | H | 10.40651 | 3.176625 | 2.889968 |
| C | 4.478555 | -4.40224 | -2.3149  | H | 9.938916 | 4.455075 | 1.750911 |
| C | -0.11022 | -5.10433 | 3.82108  | H | 8.768112 | 3.859593 | 2.949559 |
| C | -1.13189 | -4.86543 | -3.2029  | H | 11.12782 | 1.712991 | 0.91684  |
| C | 0.101553 | -5.1087  | -3.81775 | H | 9.982455 | 1.314749 | -0.37601 |
| C | -5.45144 | -0.54819 | -3.5155  | H | 10.62369 | 2.968991 | -0.23513 |
| C | -8.05919 | -4.23936 | -0.32972 | H | 9.982426 | -1.32064 | 0.352421 |
| C | -1.26784 | -4.55489 | 3.269053 | H | 10.61757 | -2.97815 | 0.221483 |

|   |          |          |          |   |          |          |          |
|---|----------|----------|----------|---|----------|----------|----------|
| H | 11.12186 | -1.73251 | -0.9414  | H | -2.22756 | -4.74296 | 3.736715 |
| H | 8.439616 | -0.3912  | -1.48787 | H | 5.221486 | -6.06534 | 2.9713   |
| H | 9.620606 | -0.91536 | -2.69573 | H | 4.879032 | -6.83348 | 1.401789 |
| H | 7.932893 | -1.43323 | -2.83462 | H | 5.759844 | -7.71832 | 2.654959 |
| H | 9.926081 | -4.47337 | -1.75504 | H | 7.613798 | -5.42162 | 3.599771 |
| H | 8.748025 | -3.88619 | -2.95027 | H | 8.045384 | -7.12327 | 3.346125 |
| H | 10.38638 | -3.20225 | -2.90569 | H | 8.968682 | -5.84596 | 2.524839 |
| H | -10.4013 | -3.18634 | 2.894848 | H | 7.543233 | -8.27144 | 1.107906 |
| H | -9.9356  | -4.46171 | 1.751235 | H | 6.822433 | -7.35087 | -0.22833 |
| H | -8.76258 | -3.86874 | 2.948652 | H | 8.49907  | -7.03031 | 0.272183 |
| H | -9.98681 | -1.31466 | -0.36665 | H | -6.5519  | -1.42566 | 1.017411 |
| H | -10.6225 | -2.97149 | -0.23304 | H | -4.79795 | -4.56205 | -1.41014 |
| H | -11.1296 | -1.7225  | 0.925429 | H | -4.79451 | 4.565304 | 1.411929 |
| H | -7.94238 | -1.41758 | 2.822666 | H | -6.54589 | 1.430312 | -1.01953 |
| H | -8.45126 | -0.37957 | 1.473659 | H | 6.550869 | 1.424798 | 1.017541 |
| H | -9.6308  | -0.90239 | 2.683629 | H | 4.798817 | 4.56338  | -1.40853 |
| H | -8.43937 | 0.385334 | -1.47745 | H | 5.451976 | 2.806023 | 3.401151 |
| H | -9.62362 | 0.904039 | -2.68458 | H | 6.753591 | 4.329918 | 4.87081  |
| H | -7.93696 | 1.424015 | -2.82841 | H | 6.514276 | 6.794514 | 4.632615 |
| H | -10.6166 | 2.973073 | 0.230053 | H | 4.960307 | 7.727403 | 2.926493 |
| H | -11.1225 | 1.724466 | -0.92903 | H | 3.663381 | 6.199812 | 1.459655 |
| H | -9.97901 | 1.316596 | 0.36251  | H | 2.226702 | 4.742412 | 3.73939  |
| H | -9.93292 | 4.464326 | -1.75405 | H | 0.169151 | 5.712911 | 4.719976 |
| H | -8.75715 | 3.874948 | -2.9504  | H | -2.03044 | 5.298063 | 3.621794 |
| H | -10.3944 | 3.188866 | -2.89931 | H | -2.1777  | 3.882543 | 1.626555 |
| H | -8.04034 | 7.128598 | 3.340719 | H | 2.235111 | -0.26766 | 2.355356 |
| H | -8.96685 | 5.851756 | 2.522172 | H | 3.693159 | 0.492507 | 4.215112 |
| H | -7.61034 | 5.426583 | 3.59465  | H | 6.072462 | -0.21466 | 4.334903 |
| H | -7.54479 | 8.272444 | 1.09775  | H | 7.024366 | -1.71001 | 2.578614 |
| H | -6.82542 | 7.349686 | -0.23777 | H | 2.237557 | 0.269269 | -2.35634 |
| H | -8.50114 | 7.028986 | 0.265742 | H | 3.693209 | -0.48607 | -4.21981 |
| H | -5.75756 | 7.723798 | 2.640962 | H | 6.072533 | 0.220975 | -4.34052 |
| H | -5.21857 | 6.071954 | 2.961675 | H | 7.026647 | 1.711699 | -2.5815  |
| H | -4.87933 | 6.834423 | 1.388907 | H | -2.18445 | -3.8816  | -1.62302 |
| H | -8.50693 | -7.02378 | -0.26597 | H | -2.03829 | -5.30139 | -3.61518 |
| H | -7.54882 | -8.26865 | -1.09373 | H | 0.161059 | -5.72114 | -4.71195 |
| H | -6.83218 | -7.34307 | 0.241215 | H | 2.219408 | -4.75039 | -3.73334 |
| H | -4.88372 | -6.83388 | -1.38486 | H | 3.675062 | -6.20522 | -1.445   |
| H | -5.76065 | -7.72113 | -2.63913 | H | 4.970288 | -7.73012 | -2.9162  |
| H | -5.21982 | -6.06936 | -2.95751 | H | 6.504111 | -6.7939  | -4.63851 |
| H | -7.61109 | -5.42736 | -3.59651 | H | 6.725443 | -4.32873 | -4.88832 |
| H | -8.04297 | -7.12835 | -3.33884 | H | 5.425782 | -2.8075  | -3.41383 |
| H | -8.96927 | -5.84893 | -2.52452 | H | -5.42842 | 2.804678 | -3.4122  |
| H | 2.177053 | -3.88316 | 1.624336 | H | -3.67219 | 6.204078 | -1.45122 |
| H | 2.029314 | -5.30037 | 3.618334 | H | -4.96689 | 7.727696 | -2.92417 |
| H | -0.17041 | -5.71543 | 4.716144 | H | -6.50316 | 6.79001  | -4.64353 |

|   |          |          |          |   |          |          |          |
|---|----------|----------|----------|---|----------|----------|----------|
| H | -6.72746 | 4.324645 | -4.88851 | H | -2.23571 | 0.270599 | 2.357832 |
| H | -2.2185  | 4.74873  | -3.73446 | H | -3.69315 | -0.48478 | 4.220015 |
| H | -0.16003 | 5.720629 | -4.71171 | H | -6.07215 | 0.223412 | 4.339288 |
| H | 2.038677 | 5.303124 | -3.61279 | H | -7.02419 | 1.715589 | 2.580329 |
| H | 2.184147 | 3.884129 | -1.61994 | H | -7.02732 | -1.71255 | -2.58318 |
| H | -3.67815 | -6.19862 | 1.451516 | H | -2.23874 | -0.26835 | -2.35843 |
| H | -4.97447 | -7.72286 | 2.922389 | H | -3.69466 | 0.485774 | -4.22223 |
| H | -6.51302 | -6.78587 | 4.640136 | H | -6.07375 | -0.22202 | -4.34265 |
| H | -6.73821 | -4.3206  | 4.885323 | H | 4.794514 | -4.56273 | 1.417341 |
| H | -5.43772 | -2.80005 | 3.411002 | H | 6.544485 | -1.43351 | -1.02244 |

---

### The Result for the TDDFT calculation

Excited State 1: Singlet-A 1.8052 eV 686.81 nm f=0.0000  $\langle S^{*2} \rangle = 0.000$

435 -> 439 -0.17972

436 -> 437 0.68098

This state for optimization and/or second-order correction.

Total Energy, E(TD-HF/TD-DFT) = -6023.98991014

Copying the excited state density for this state as the 1-particle RhoCI density.

Excited State 2: Singlet-A 1.8171 eV 682.32 nm f=0.0000  $\langle S^{*2} \rangle = 0.000$

435 -> 440 -0.17970

436 -> 438 0.68095

Excited State 3: Singlet-A 1.8487 eV 670.64 nm f=0.0000  $\langle S^{*2} \rangle = 0.000$

435 -> 437 -0.34810

436 -> 439 0.61138

Excited State 4: Singlet-A 1.8588 eV 667.01 nm f=0.0001  $\langle S^{*2} \rangle = 0.000$

435 -> 438 -0.33909

436 -> 440 0.61637

Excited State 5: Singlet-A 1.9672 eV 630.25 nm f=0.0002  $\langle S^{*2} \rangle = 0.000$

435 -> 437 0.61235

436 -> 439 0.35139

Excited State 6: Singlet-A 1.9772 eV 627.06 nm f=0.0000  $\langle S^{*2} \rangle = 0.000$

435 -> 438 0.61730

436 -> 440 0.34246

Excited State 7: Singlet-A 2.0105 eV 616.68 nm f=0.0000 <S\*\*2>=0.000  
435 -> 439 0.68077  
436 -> 437 0.18335

Excited State 8: Singlet-A 2.0188 eV 614.15 nm f=0.0002 <S\*\*2>=0.000  
435 -> 440 0.68063  
436 -> 438 0.18347

Excited State 9: Singlet-A 2.4324 eV 509.73 nm f=0.0015 <S\*\*2>=0.000  
429 -> 438 0.10020  
432 -> 439 0.11913  
433 -> 437 0.12710  
434 -> 437 0.66854

Excited State 10: Singlet-A 2.4447 eV 507.16 nm f=0.0000 <S\*\*2>=0.000  
429 -> 437 0.11336  
432 -> 440 0.13104  
433 -> 438 0.14918  
434 -> 438 0.65926

Excited State 11: Singlet-A 2.4791 eV 500.13 nm f=0.0003 <S\*\*2>=0.000  
429 -> 440 0.13024  
432 -> 437 0.30387  
433 -> 439 0.22296  
434 -> 439 0.55828

Excited State 12: Singlet-A 2.4873 eV 498.47 nm f=0.0001 <S\*\*2>=0.000  
429 -> 439 0.14078  
431 -> 437 -0.10546  
432 -> 438 0.31182  
433 -> 440 0.23765  
434 -> 440 0.54295

Excited State 13: Singlet-A 2.5031 eV 495.33 nm f=0.0008 <S\*\*2>=0.000

|                                                                       |          |
|-----------------------------------------------------------------------|----------|
| 429 -> 438                                                            | 0.16052  |
| 432 -> 439                                                            | 0.28254  |
| 433 -> 437                                                            | 0.58065  |
| 434 -> 437                                                            | -0.19515 |
| Excited State 14: Singlet-A 2.5125 eV 493.46 nm f=0.0000 <S**2>=0.000 |          |
| 429 -> 437                                                            | 0.16694  |
| 432 -> 440                                                            | 0.28022  |
| 433 -> 438                                                            | 0.56816  |
| 434 -> 438                                                            | -0.22618 |
| Excited State 15: Singlet-A 2.5288 eV 490.29 nm f=0.0001 <S**2>=0.000 |          |
| 432 -> 437                                                            | -0.38714 |
| 433 -> 439                                                            | -0.38520 |
| 434 -> 439                                                            | 0.40972  |
| Excited State 16: Singlet-A 2.5378 eV 488.55 nm f=0.0000 <S**2>=0.000 |          |
| 432 -> 438                                                            | -0.37147 |
| 433 -> 440                                                            | -0.37568 |
| 434 -> 440                                                            | 0.43206  |
| Excited State 17: Singlet-A 2.5966 eV 477.48 nm f=0.0000 <S**2>=0.000 |          |
| 435 -> 443                                                            | -0.20187 |
| 436 -> 441                                                            | 0.67153  |
| Excited State 18: Singlet-A 2.6328 eV 470.92 nm f=0.0202 <S**2>=0.000 |          |
| 435 -> 444                                                            | -0.24741 |
| 436 -> 442                                                            | 0.65216  |
| Excited State 19: Singlet-A 2.6516 eV 467.59 nm f=0.0058 <S**2>=0.000 |          |
| 435 -> 441                                                            | -0.44921 |
| 436 -> 443                                                            | 0.53270  |
| Excited State 20: Singlet-A 2.6592 eV 466.24 nm f=0.0001 <S**2>=0.000 |          |
| 431 -> 438                                                            | 0.11012  |
| 432 -> 437                                                            | -0.45073 |

433 -> 439    0.51111

Excited State 21:    Singlet-A    2.6652 eV 465.20 nm f=0.0083 <S\*\*2>=0.000  
435 -> 442    -0.39540  
436 -> 444    0.56337

Excited State 22:    Singlet-A    2.6674 eV 464.80 nm f=0.0006 <S\*\*2>=0.000  
431 -> 437    0.14240  
432 -> 438    -0.44442  
433 -> 440    0.50783

Excited State 23:    Singlet-A    2.6733 eV 463.78 nm f=0.0002 <S\*\*2>=0.000  
428 -> 440    -0.10049  
431 -> 440    -0.14895  
432 -> 439    0.58244  
433 -> 437    -0.34261

Excited State 24:    Singlet-A    2.6805 eV 462.54 nm f=0.0000 <S\*\*2>=0.000  
428 -> 439    -0.10331  
431 -> 439    -0.16863  
432 -> 440    0.57133  
433 -> 438    -0.35091

Excited State 25:    Singlet-A    2.7282 eV 454.45 nm f=0.0001 <S\*\*2>=0.000  
430 -> 438    0.15889  
431 -> 437    0.63959  
432 -> 438    0.20209

Excited State 26:    Singlet-A    2.7377 eV 452.87 nm f=0.0000 <S\*\*2>=0.000  
430 -> 437    0.25071  
431 -> 438    0.61892  
432 -> 437    0.17629

Excited State 27:    Singlet-A    2.7757 eV 446.68 nm f=0.0000 <S\*\*2>=0.000  
429 -> 437    -0.36184  
430 -> 440    0.13698



|                   |           |           |           |          |              |
|-------------------|-----------|-----------|-----------|----------|--------------|
| 431 -> 439        | 0.52288   |           |           |          |              |
| 432 -> 440        | 0.23717   |           |           |          |              |
| Excited State 28: | Singlet-A | 2.7833 eV | 445.46 nm | f=0.0001 | <S**2>=0.000 |
| 429 -> 438        | -0.35933  |           |           |          |              |
| 430 -> 439        | 0.18485   |           |           |          |              |
| 431 -> 440        | 0.52049   |           |           |          |              |
| 432 -> 439        | 0.21631   |           |           |          |              |
| Excited State 29: | Singlet-A | 2.7847 eV | 445.24 nm | f=0.0000 | <S**2>=0.000 |
| 430 -> 437        | 0.64271   |           |           |          |              |
| 431 -> 438        | -0.26348  |           |           |          |              |
| Excited State 30: | Singlet-A | 2.7957 eV | 443.49 nm | f=0.0000 | <S**2>=0.000 |
| 430 -> 438        | 0.67318   |           |           |          |              |
| 431 -> 437        | -0.17788  |           |           |          |              |
| Excited State 31: | Singlet-A | 2.8030 eV | 442.32 nm | f=0.0062 | <S**2>=0.000 |
| 435 -> 441        | 0.53844   |           |           |          |              |
| 436 -> 443        | 0.45434   |           |           |          |              |
| Excited State 32: | Singlet-A | 2.8113 eV | 441.02 nm | f=0.0000 | <S**2>=0.000 |
| 428 -> 439        | -0.20930  |           |           |          |              |
| 429 -> 437        | 0.52770   |           |           |          |              |
| 430 -> 440        | 0.14424   |           |           |          |              |
| 431 -> 439        | 0.35242   |           |           |          |              |
| 433 -> 438        | -0.14983  |           |           |          |              |
| Excited State 33: | Singlet-A | 2.8192 eV | 439.79 nm | f=0.0004 | <S**2>=0.000 |
| 428 -> 440        | -0.19949  |           |           |          |              |
| 429 -> 438        | 0.52489   |           |           |          |              |
| 430 -> 439        | 0.25147   |           |           |          |              |
| 431 -> 440        | 0.30293   |           |           |          |              |
| 433 -> 437        | -0.14571  |           |           |          |              |
| Excited State 34: | Singlet-A | 2.8349 eV | 437.35 nm | f=0.0000 | <S**2>=0.000 |

|                                                                       |          |
|-----------------------------------------------------------------------|----------|
| 428 -> 437                                                            | -0.45149 |
| 429 -> 439                                                            | 0.49157  |
| 432 -> 438                                                            | -0.12424 |
| 433 -> 440                                                            | -0.17021 |
| Excited State 35: Singlet-A 2.8424 eV 436.20 nm f=0.0016 <S**2>=0.000 |          |
| 428 -> 438                                                            | -0.35342 |
| 429 -> 440                                                            | 0.39515  |
| 433 -> 439                                                            | -0.13030 |
| 435 -> 442                                                            | -0.35194 |
| 436 -> 444                                                            | -0.24494 |
| Excited State 36: Singlet-A 2.8432 eV 436.07 nm f=0.0004 <S**2>=0.000 |          |
| 430 -> 439                                                            | 0.62407  |
| 431 -> 440                                                            | -0.29543 |
| Excited State 37: Singlet-A 2.8440 eV 435.96 nm f=0.0006 <S**2>=0.000 |          |
| 428 -> 438                                                            | -0.27098 |
| 429 -> 440                                                            | 0.30787  |
| 435 -> 442                                                            | 0.45918  |
| 436 -> 444                                                            | 0.31459  |
| Excited State 38: Singlet-A 2.8500 eV 435.03 nm f=0.0000 <S**2>=0.000 |          |
| 430 -> 440                                                            | 0.66906  |
| 431 -> 439                                                            | -0.20276 |
| Excited State 39: Singlet-A 2.8592 eV 433.64 nm f=0.0000 <S**2>=0.000 |          |
| 435 -> 443                                                            | 0.67025  |
| 436 -> 441                                                            | 0.20746  |
| Excited State 40: Singlet-A 2.8743 eV 431.36 nm f=0.0027 <S**2>=0.000 |          |
| 435 -> 444                                                            | 0.63979  |
| 436 -> 442                                                            | 0.26181  |
| Excited State 41: Singlet-A 2.9206 eV 424.52 nm f=0.0005 <S**2>=0.000 |          |
| 428 -> 437                                                            | 0.50873  |

|                                                                       |          |
|-----------------------------------------------------------------------|----------|
| 429 -> 439                                                            | 0.45571  |
| 431 -> 437                                                            | 0.10475  |
| Excited State 42: Singlet-A 2.9297 eV 423.20 nm f=0.0001 <S**2>=0.000 |          |
| 428 -> 438                                                            | 0.51896  |
| 429 -> 440                                                            | 0.44744  |
| Excited State 43: Singlet-A 2.9477 eV 420.61 nm f=0.0000 <S**2>=0.000 |          |
| 427 -> 437                                                            | -0.28883 |
| 428 -> 439                                                            | 0.58613  |
| 429 -> 437                                                            | 0.19677  |
| 431 -> 439                                                            | 0.13124  |
| 432 -> 440                                                            | 0.12287  |
| Excited State 44: Singlet-A 2.9568 eV 419.33 nm f=0.0006 <S**2>=0.000 |          |
| 427 -> 438                                                            | -0.26473 |
| 428 -> 440                                                            | 0.59954  |
| 429 -> 438                                                            | 0.20273  |
| 431 -> 440                                                            | 0.11925  |
| 432 -> 439                                                            | 0.11617  |
| Excited State 45: Singlet-A 3.0009 eV 413.15 nm f=0.0000 <S**2>=0.000 |          |
| 427 -> 437                                                            | 0.62850  |
| 428 -> 439                                                            | 0.29586  |
| Excited State 46: Singlet-A 3.0124 eV 411.58 nm f=0.0002 <S**2>=0.000 |          |
| 427 -> 438                                                            | 0.64106  |
| 428 -> 440                                                            | 0.27024  |
| Excited State 47: Singlet-A 3.0495 eV 406.57 nm f=0.0000 <S**2>=0.000 |          |
| 413 -> 439                                                            | 0.18161  |
| 414 -> 440                                                            | -0.18127 |
| 415 -> 437                                                            | 0.18715  |
| 416 -> 438                                                            | -0.18896 |
| 427 -> 439                                                            | 0.58344  |

Excited State 48: Singlet-A 3.0533 eV 406.07 nm f=0.0000 <S\*\*2>=0.000

413 -> 440 -0.30875

414 -> 439 0.30888

415 -> 438 -0.31734

416 -> 437 0.32418

427 -> 440 -0.27513

Excited State 49: Singlet-A 3.0558 eV 405.73 nm f=0.0000 <S\*\*2>=0.000

413 -> 437 0.35594

414 -> 438 -0.35183

415 -> 439 0.33042

416 -> 440 -0.33419

Excited State 50: Singlet-A 3.0559 eV 405.73 nm f=0.0000 <S\*\*2>=0.000

413 -> 438 0.35371

414 -> 437 -0.35335

415 -> 440 0.32854

416 -> 439 -0.33523

Excited State 51: Singlet-A 3.0570 eV 405.58 nm f=0.0000 <S\*\*2>=0.000

413 -> 439 -0.28553

414 -> 440 0.28164

415 -> 437 -0.29365

416 -> 438 0.29671

427 -> 439 0.37491

Excited State 52: Singlet-A 3.0627 eV 404.81 nm f=0.0000 <S\*\*2>=0.000

413 -> 440 -0.13491

414 -> 439 0.13299

415 -> 438 -0.13835

416 -> 437 0.14144

427 -> 440 0.63793

Excited State 53: Singlet-A 3.1610 eV 392.23 nm f=0.0099 <S\*\*2>=0.000

435 -> 446 -0.17677

435 -> 449 0.13249

|                   |           |           |           |          |              |
|-------------------|-----------|-----------|-----------|----------|--------------|
| 436 -> 444        | -0.13102  |           |           |          |              |
| 436 -> 445        | 0.60342   |           |           |          |              |
| 436 -> 450        | -0.15029  |           |           |          |              |
| 436 -> 457        | -0.11693  |           |           |          |              |
| Excited State 54: | Singlet-A | 3.1751 eV | 390.49 nm | f=0.0271 | <S**2>=0.000 |
| 430 -> 443        | -0.11857  |           |           |          |              |
| 433 -> 441        | -0.14027  |           |           |          |              |
| 434 -> 441        | 0.60401   |           |           |          |              |
| 435 -> 445        | -0.17040  |           |           |          |              |
| 436 -> 446        | 0.18445   |           |           |          |              |
| Excited State 55: | Singlet-A | 3.1964 eV | 387.89 nm | f=0.0000 | <S**2>=0.000 |
| 425 -> 439        | -0.17693  |           |           |          |              |
| 426 -> 437        | 0.68261   |           |           |          |              |
| Excited State 56: | Singlet-A | 3.2073 eV | 386.56 nm | f=0.0000 | <S**2>=0.000 |
| 425 -> 440        | -0.17813  |           |           |          |              |
| 426 -> 438        | 0.68250   |           |           |          |              |
| Excited State 57: | Singlet-A | 3.2342 eV | 383.35 nm | f=0.1597 | <S**2>=0.000 |
| 434 -> 441        | -0.27963  |           |           |          |              |
| 435 -> 444        | 0.11279   |           |           |          |              |
| 435 -> 445        | -0.37277  |           |           |          |              |
| 436 -> 446        | 0.44604   |           |           |          |              |
| 436 -> 449        | -0.16327  |           |           |          |              |
| Excited State 58: | Singlet-A | 3.2397 eV | 382.70 nm | f=0.0001 | <S**2>=0.000 |
| 425 -> 437        | -0.35471  |           |           |          |              |
| 426 -> 439        | 0.60954   |           |           |          |              |
| Excited State 59: | Singlet-A | 3.2456 eV | 382.01 nm | f=0.0000 | <S**2>=0.000 |
| 434 -> 442        | 0.53694   |           |           |          |              |
| 435 -> 448        | 0.16355   |           |           |          |              |
| 436 -> 447        | -0.34592  |           |           |          |              |
| 436 -> 451        | -0.13745  |           |           |          |              |

Excited State 60: Singlet-A 3.2488 eV 381.63 nm f=0.0002 <S\*\*2>=0.000  
425 -> 438 -0.34642  
426 -> 440 0.61398

Excited State 61: Singlet-A 3.2560 eV 380.78 nm f=0.0030 <S\*\*2>=0.000  
430 -> 441 -0.21659  
433 -> 443 -0.13931  
434 -> 443 0.63235

Excited State 62: Singlet-A 3.2685 eV 379.33 nm f=0.0040 <S\*\*2>=0.000  
434 -> 444 -0.32222  
435 -> 447 -0.21945  
435 -> 451 -0.12963  
436 -> 448 0.51952  
436 -> 452 0.15263

Excited State 63: Singlet-A 3.2996 eV 375.76 nm f=0.0000 <S\*\*2>=0.000  
433 -> 442 -0.12676  
434 -> 442 0.36590  
435 -> 448 -0.14282  
436 -> 447 0.55393

Excited State 64: Singlet-A 3.3269 eV 372.67 nm f=0.0004 <S\*\*2>=0.000  
431 -> 441 0.15932  
433 -> 444 -0.13894  
434 -> 444 0.52782  
434 -> 445 0.10187  
435 -> 447 -0.10186  
436 -> 448 0.35488

Excited State 65: Singlet-A 3.3454 eV 370.62 nm f=0.0368 <S\*\*2>=0.000  
433 -> 441 0.15553  
435 -> 445 0.35467  
435 -> 450 -0.15106  
436 -> 446 0.48907

436 -> 449 0.21835

Excited State 66: Singlet-A 3.3494 eV 370.17 nm f=0.0000 <S\*\*2>=0.000  
425 -> 437 0.61024  
426 -> 439 0.35443

Excited State 67: Singlet-A 3.3594 eV 369.07 nm f=0.0001 <S\*\*2>=0.000  
425 -> 438 0.61513  
426 -> 440 0.34593

Excited State 68: Singlet-A 3.3929 eV 365.42 nm f=0.0001 <S\*\*2>=0.000  
425 -> 439 0.68257  
426 -> 437 0.17660

Excited State 69: Singlet-A 3.4010 eV 364.55 nm f=0.0000 <S\*\*2>=0.000  
425 -> 440 0.68248  
426 -> 438 0.17798

Excited State 70: Singlet-A 3.4084 eV 363.76 nm f=0.0086 <S\*\*2>=0.000  
432 -> 441 0.30214  
433 -> 443 0.14932  
435 -> 446 -0.12914  
435 -> 449 -0.24702  
436 -> 445 0.19551  
436 -> 450 0.49033

Excited State 71: Singlet-A 3.4090 eV 363.70 nm f=0.0193 <S\*\*2>=0.000  
432 -> 443 0.12170  
433 -> 441 0.60797  
434 -> 441 0.14967  
435 -> 445 -0.21929  
436 -> 446 -0.12628

Excited State 72: Singlet-A 3.4195 eV 362.58 nm f=0.0000 <S\*\*2>=0.000  
431 -> 443 0.13561  
433 -> 442 0.12446

|                   |           |           |           |          |              |
|-------------------|-----------|-----------|-----------|----------|--------------|
| 434 -> 442        | 0.16665   |           |           |          |              |
| 435 -> 448        | -0.34759  |           |           |          |              |
| 435 -> 452        | -0.24736  |           |           |          |              |
| 436 -> 447        | -0.20175  |           |           |          |              |
| 436 -> 451        | 0.42388   |           |           |          |              |
|                   |           |           |           |          |              |
| Excited State 73: | Singlet-A | 3.4213 eV | 362.39 nm | f=0.0019 | <S**2>=0.000 |
| 435 -> 446        | 0.63722   |           |           |          |              |
| 436 -> 445        | 0.22121   |           |           |          |              |
| 436 -> 450        | 0.10336   |           |           |          |              |
|                   |           |           |           |          |              |
| Excited State 74: | Singlet-A | 3.4321 eV | 361.25 nm | f=0.0039 | <S**2>=0.000 |
| 431 -> 441        | 0.28154   |           |           |          |              |
| 435 -> 447        | -0.34531  |           |           |          |              |
| 435 -> 451        | -0.22116  |           |           |          |              |
| 436 -> 448        | -0.28190  |           |           |          |              |
| 436 -> 452        | 0.36044   |           |           |          |              |
|                   |           |           |           |          |              |
| Excited State 75: | Singlet-A | 3.4390 eV | 360.53 nm | f=0.0001 | <S**2>=0.000 |
| 432 -> 442        | 0.17995   |           |           |          |              |
| 433 -> 444        | 0.11731   |           |           |          |              |
| 434 -> 444        | 0.10563   |           |           |          |              |
| 435 -> 447        | 0.50597   |           |           |          |              |
| 435 -> 451        | -0.18610  |           |           |          |              |
| 436 -> 448        | 0.10323   |           |           |          |              |
| 436 -> 452        | 0.34969   |           |           |          |              |
|                   |           |           |           |          |              |
| Excited State 76: | Singlet-A | 3.4499 eV | 359.39 nm | f=0.0000 | <S**2>=0.000 |
| 429 -> 441        | 0.11497   |           |           |          |              |
| 432 -> 444        | 0.14766   |           |           |          |              |
| 433 -> 442        | 0.56969   |           |           |          |              |
| 434 -> 442        | 0.12903   |           |           |          |              |
| 435 -> 448        | 0.29797   |           |           |          |              |
| 436 -> 447        | 0.14326   |           |           |          |              |
|                   |           |           |           |          |              |
| Excited State 77: | Singlet-A | 3.4530 eV | 359.07 nm | f=0.0429 | <S**2>=0.000 |



|                                                                       |          |
|-----------------------------------------------------------------------|----------|
| 433 -> 441                                                            | -0.20809 |
| 435 -> 445                                                            | -0.31775 |
| 435 -> 450                                                            | -0.25293 |
| 436 -> 449                                                            | 0.53128  |
| Excited State 78: Singlet-A 3.4783 eV 356.45 nm f=0.1036 <S**2>=0.000 |          |
| 432 -> 441                                                            | 0.59127  |
| 433 -> 443                                                            | 0.12537  |
| 435 -> 446                                                            | 0.14558  |
| 435 -> 449                                                            | 0.12128  |
| 436 -> 450                                                            | -0.28930 |
| Excited State 79: Singlet-A 3.4794 eV 356.34 nm f=0.0000 <S**2>=0.000 |          |
| 433 -> 442                                                            | -0.28322 |
| 435 -> 448                                                            | 0.47308  |
| 435 -> 452                                                            | -0.19924 |
| 436 -> 451                                                            | 0.37168  |
| Excited State 80: Singlet-A 3.4802 eV 356.25 nm f=0.0009 <S**2>=0.000 |          |
| 427 -> 443                                                            | 0.12120  |
| 428 -> 441                                                            | -0.14073 |
| 431 -> 441                                                            | 0.55547  |
| 433 -> 444                                                            | 0.10466  |
| 434 -> 444                                                            | -0.17047 |
| 435 -> 447                                                            | 0.16042  |
| 436 -> 452                                                            | -0.22724 |
| Excited State 81: Singlet-A 3.5018 eV 354.05 nm f=0.0000 <S**2>=0.000 |          |
| 427 -> 444                                                            | 0.14179  |
| 428 -> 442                                                            | -0.10548 |
| 430 -> 441                                                            | 0.17286  |
| 431 -> 442                                                            | 0.55562  |
| 433 -> 443                                                            | 0.31511  |
| Excited State 82: Singlet-A 3.5081 eV 353.43 nm f=0.0763 <S**2>=0.000 |          |
| 432 -> 442                                                            | 0.56171  |

433 -> 444 0.30325  
434 -> 444 0.11148  
435 -> 447 -0.16751  
436 -> 452 -0.15290

Excited State 83: Singlet-A 3.5228 eV 351.95 nm f=0.0295 <S\*\*2>=0.000

427 -> 444 -0.11669  
428 -> 442 0.14592  
430 -> 441 0.38454  
431 -> 442 -0.30297  
433 -> 443 0.35326  
434 -> 443 0.25510

Excited State 84: Singlet-A 3.5529 eV 348.97 nm f=0.0000 <S\*\*2>=0.000

427 -> 441 0.25431  
428 -> 443 -0.15866  
429 -> 441 -0.11939  
430 -> 444 -0.13607  
431 -> 443 0.56102  
434 -> 442 -0.13415  
436 -> 451 -0.11149

Excited State 85: Singlet-A 3.5543 eV 348.83 nm f=0.0006 <S\*\*2>=0.000

428 -> 441 0.12940  
429 -> 443 0.14260  
430 -> 442 0.20977  
432 -> 442 -0.33708  
433 -> 444 0.52185  
434 -> 444 0.14801

Excited State 86: Singlet-A 3.5562 eV 348.64 nm f=0.0887 <S\*\*2>=0.000

427 -> 442 0.24619  
428 -> 444 -0.17519  
430 -> 443 -0.14759  
431 -> 444 0.57489  
431 -> 445 0.10299

Excited State 87: Singlet-A 3.5655 eV 347.74 nm f=0.0217 <S\*\*2>=0.000  
430 -> 441 0.50224  
432 -> 441 0.13459  
433 -> 443 -0.44535

Excited State 88: Singlet-A 3.5691 eV 347.38 nm f=0.0247 <S\*\*2>=0.000  
429 -> 442 -0.10938  
431 -> 444 -0.11456  
432 -> 443 0.67042  
433 -> 441 -0.10225

Excited State 89: Singlet-A 3.5927 eV 345.10 nm f=0.0000 <S\*\*2>=0.000  
429 -> 441 -0.19593  
431 -> 443 -0.13040  
432 -> 444 0.64477  
433 -> 442 -0.11494

Excited State 90: Singlet-A 3.6055 eV 343.88 nm f=0.0000 <S\*\*2>=0.000  
424 -> 437 0.70380

Excited State 91: Singlet-A 3.6173 eV 342.76 nm f=0.0001 <S\*\*2>=0.000  
424 -> 438 0.70465

Excited State 92: Singlet-A 3.6245 eV 342.07 nm f=0.0001 <S\*\*2>=0.000  
435 -> 445 0.10317  
435 -> 450 0.55026  
435 -> 457 0.14458  
435 -> 460 -0.13607  
436 -> 449 0.33181

Excited State 93: Singlet-A 3.6250 eV 342.03 nm f=0.0050 <S\*\*2>=0.000  
435 -> 449 0.56634  
436 -> 450 0.21243  
436 -> 457 0.19841  
436 -> 460 -0.20180

436 -> 465 -0.12256

Excited State 94: Singlet-A 3.6300 eV 341.55 nm f=0.0040 <S\*\*2>=0.000  
430 -> 442 0.62600  
433 -> 444 -0.24081  
436 -> 452 -0.11729

Excited State 95: Singlet-A 3.6410 eV 340.53 nm f=0.1542 <S\*\*2>=0.000  
430 -> 443 0.63832  
431 -> 444 0.15598  
433 -> 441 -0.10510

Excited State 96: Singlet-A 3.6605 eV 338.71 nm f=0.0000 <S\*\*2>=0.000  
428 -> 443 -0.22518  
429 -> 441 0.60344  
432 -> 444 0.13561  
433 -> 442 -0.16027  
436 -> 451 -0.10953

Excited State 97: Singlet-A 3.6648 eV 338.31 nm f=0.0006 <S\*\*2>=0.000  
424 -> 439 0.70417

Excited State 98: Singlet-A 3.6671 eV 338.10 nm f=0.0000 <S\*\*2>=0.000  
429 -> 441 -0.15250  
430 -> 444 0.50887  
430 -> 445 0.11184  
431 -> 443 0.10067  
435 -> 452 -0.27665  
436 -> 451 -0.25388

Excited State 99: Singlet-A 3.6735 eV 337.51 nm f=0.0000 <S\*\*2>=0.000  
424 -> 440 0.70367

Excited State 100: Singlet-A 3.6841 eV 336.54 nm f=0.0032 <S\*\*2>=0.000  
430 -> 442 0.10839  
435 -> 451 0.58142

436 -> 452    0.33390

Excited State 101:    Singlet-A    3.6847 eV 336.49 nm f=0.0191 <S\*\*2>=0.000

435 -> 449    0.24674

435 -> 468    -0.12037

436 -> 445    -0.14303

436 -> 450    0.28636

436 -> 453    0.10687

436 -> 457    -0.31536

436 -> 460    0.32567

436 -> 465    0.20919

Excited State 102:    Singlet-A    3.6909 eV 335.92 nm f=0.0000 <S\*\*2>=0.000

430 -> 444    0.33412

431 -> 443    0.13467

435 -> 452    0.52883

436 -> 451    0.22937

Excited State 103:    Singlet-A    3.7020 eV 334.92 nm f=0.0135 <S\*\*2>=0.000

428 -> 444    -0.22924

429 -> 442    0.64406

Excited State 104:    Singlet-A    3.7030 eV 334.82 nm f=0.0541 <S\*\*2>=0.000

428 -> 441    0.57010

429 -> 443    -0.33709

431 -> 441    0.14577

435 -> 451    -0.10535

Excited State 105:    Singlet-A    3.7414 eV 331.39 nm f=0.0910 <S\*\*2>=0.000

428 -> 442    0.53983

429 -> 444    -0.39752

431 -> 442    0.13899

Excited State 106:    Singlet-A    3.7610 eV 329.65 nm f=0.0007 <S\*\*2>=0.000

434 -> 444    -0.15192

434 -> 445    0.59232

434 -> 450 -0.15321  
434 -> 457 -0.15660  
434 -> 460 0.10196

Excited State 107: Singlet-A 3.7681 eV 329.04 nm f=0.0000 <S\*\*2>=0.000

427 -> 441 0.58883  
428 -> 443 -0.11230  
430 -> 444 0.13116  
431 -> 443 -0.29294  
432 -> 444 -0.10253

Excited State 108: Singlet-A 3.7704 eV 328.84 nm f=0.0272 <S\*\*2>=0.000

435 -> 445 -0.15623  
435 -> 450 0.26563  
435 -> 453 0.13864  
435 -> 457 -0.30771  
435 -> 460 0.32021  
435 -> 465 0.20728  
436 -> 454 0.17440  
436 -> 468 -0.16257  
436 -> 470 -0.13187

Excited State 109: Singlet-A 3.7916 eV 327.00 nm f=0.0000 <S\*\*2>=0.000

418 -> 438 -0.12252  
420 -> 439 -0.11502  
422 -> 440 -0.11366  
423 -> 437 0.66915

Excited State 110: Singlet-A 3.7958 eV 326.63 nm f=0.0118 <S\*\*2>=0.000

427 -> 443 -0.22122  
428 -> 441 0.24679  
429 -> 443 0.55903  
431 -> 441 0.14371  
432 -> 442 0.12198  
433 -> 444 -0.12074

Excited State 111: Singlet-A 3.8012 eV 326.17 nm f=0.0007 <S\*\*2>=0.000  
418 -> 437 -0.13458  
420 -> 440 -0.12117  
422 -> 439 -0.13035  
423 -> 438 0.66078

Excited State 112: Singlet-A 3.8086 eV 325.54 nm f=0.0257 <S\*\*2>=0.000  
427 -> 442 0.58520  
428 -> 444 -0.17191  
431 -> 444 -0.29005

Excited State 113: Singlet-A 3.8164 eV 324.87 nm f=0.0040 <S\*\*2>=0.000  
427 -> 444 -0.34574  
428 -> 442 0.24264  
429 -> 444 0.48174  
431 -> 442 0.21139

Excited State 114: Singlet-A 3.8339 eV 323.39 nm f=0.0000 <S\*\*2>=0.000  
418 -> 440 -0.14362  
420 -> 437 -0.24447  
422 -> 438 -0.31028  
423 -> 439 0.54836

Excited State 115: Singlet-A 3.8370 eV 323.13 nm f=0.0036 <S\*\*2>=0.000  
418 -> 439 -0.15125  
420 -> 438 -0.24694  
422 -> 437 -0.35979  
423 -> 440 0.50182

Excited State 116: Singlet-A 3.8434 eV 322.59 nm f=0.0022 <S\*\*2>=0.000  
434 -> 448 0.11933  
435 -> 454 0.27851  
436 -> 453 0.59042  
436 -> 457 0.12605

Excited State 117: Singlet-A 3.8486 eV 322.16 nm f=0.0000 <S\*\*2>=0.000

|                                                                        |          |
|------------------------------------------------------------------------|----------|
| 427 -> 441                                                             | 0.20535  |
| 428 -> 443                                                             | 0.61374  |
| 429 -> 441                                                             | 0.17093  |
| 432 -> 444                                                             | 0.13136  |
| Excited State 118: Singlet-A 3.8521 eV 321.86 nm f=0.0077 <S**2>=0.000 |          |
| 435 -> 453                                                             | 0.26677  |
| 435 -> 457                                                             | 0.15046  |
| 435 -> 460                                                             | -0.10984 |
| 436 -> 454                                                             | 0.57034  |
| Excited State 119: Singlet-A 3.8554 eV 321.58 nm f=0.0004 <S**2>=0.000 |          |
| 427 -> 443                                                             | 0.60916  |
| 428 -> 441                                                             | 0.21899  |
| 429 -> 443                                                             | 0.18568  |
| Excited State 120: Singlet-A 3.8633 eV 320.93 nm f=0.0000 <S**2>=0.000 |          |
| 430 -> 444                                                             | 0.15353  |
| 430 -> 445                                                             | -0.17632 |
| 434 -> 446                                                             | 0.60469  |
| 434 -> 449                                                             | -0.18086 |
| Excited State 121: Singlet-A 3.8689 eV 320.47 nm f=0.0008 <S**2>=0.000 |          |
| 435 -> 456                                                             | -0.28494 |
| 436 -> 455                                                             | 0.62158  |
| Excited State 122: Singlet-A 3.8710 eV 320.29 nm f=0.0002 <S**2>=0.000 |          |
| 427 -> 444                                                             | 0.49840  |
| 427 -> 445                                                             | 0.11106  |
| 428 -> 442                                                             | 0.29033  |
| 429 -> 444                                                             | 0.26964  |
| 434 -> 448                                                             | 0.19027  |
| Excited State 123: Singlet-A 3.8727 eV 320.15 nm f=0.0000 <S**2>=0.000 |          |
| 435 -> 455                                                             | -0.29858 |
| 436 -> 456                                                             | 0.61704  |



Excited State 124: Singlet-A 3.8733 eV 320.10 nm f=0.0014 <S\*\*2>=0.000

427 -> 444 -0.17976

428 -> 442 -0.10334

430 -> 447 -0.10732

430 -> 451 -0.10173

434 -> 448 0.56360

434 -> 452 0.17342

436 -> 453 -0.13427

Excited State 125: Singlet-A 3.8746 eV 319.99 nm f=0.0002 <S\*\*2>=0.000

427 -> 442 -0.13818

428 -> 444 -0.34966

429 -> 442 -0.11843

430 -> 443 -0.10846

434 -> 447 0.49649

434 -> 451 0.14472

Excited State 126: Singlet-A 3.8834 eV 319.27 nm f=0.0068 <S\*\*2>=0.000

427 -> 442 0.23341

428 -> 444 0.47402

429 -> 442 0.14380

434 -> 447 0.35631

434 -> 451 0.10441

Excited State 127: Singlet-A 3.9049 eV 317.51 nm f=0.0012 <S\*\*2>=0.000

420 -> 438 0.18582

422 -> 437 0.48378

423 -> 440 0.46323

Excited State 128: Singlet-A 3.9058 eV 317.44 nm f=0.0000 <S\*\*2>=0.000

420 -> 437 0.23777

422 -> 438 0.49390

423 -> 439 0.42022

Excited State 129: Singlet-A 3.9289 eV 315.57 nm f=0.0016 <S\*\*2>=0.000

417 -> 437 -0.10283  
417 -> 438 -0.12168  
418 -> 437 0.15623  
418 -> 438 0.12487  
420 -> 439 0.17907  
420 -> 440 0.21251  
421 -> 437 -0.16306  
421 -> 438 -0.15377  
422 -> 439 0.39518  
422 -> 440 0.29117  
423 -> 437 0.12726  
423 -> 438 0.17450

Excited State 130: Singlet-A 3.9290 eV 315.56 nm f=0.0013 <S\*\*2>=0.000

417 -> 437 -0.12800  
418 -> 437 -0.12434  
418 -> 438 0.15728  
420 -> 439 0.22225  
420 -> 440 -0.17157  
421 -> 437 -0.20343  
421 -> 438 0.12376  
422 -> 439 -0.31294  
422 -> 440 0.36776  
423 -> 437 0.15826  
423 -> 438 -0.14005

Excited State 131: Singlet-A 3.9661 eV 312.61 nm f=0.0061 <S\*\*2>=0.000

429 -> 448 -0.11801  
432 -> 446 0.23275  
433 -> 445 0.58131  
436 -> 455 -0.12672

Excited State 132: Singlet-A 3.9713 eV 312.20 nm f=0.0038 <S\*\*2>=0.000

420 -> 439 0.11528  
421 -> 437 0.64127  
422 -> 440 0.23070

Excited State 133: Singlet-A 3.9809 eV 311.45 nm f=0.0001 <S\*\*2>=0.000

421 -> 438 0.65851

422 -> 439 0.21004

Excited State 134: Singlet-A 3.9899 eV 310.75 nm f=0.0000 <S\*\*2>=0.000

426 -> 442 0.10259

429 -> 447 -0.10638

432 -> 445 0.41386

433 -> 446 0.44414

436 -> 456 -0.13370

Excited State 135: Singlet-A 3.9991 eV 310.03 nm f=0.0237 <S\*\*2>=0.000

425 -> 443 -0.14468

426 -> 441 0.45574

431 -> 445 -0.10196

432 -> 448 -0.16961

433 -> 447 -0.32525

435 -> 453 0.16677

436 -> 454 -0.16253

Excited State 136: Singlet-A 4.0076 eV 309.37 nm f=0.0071 <S\*\*2>=0.000

426 -> 441 0.22488

430 -> 452 -0.12713

431 -> 445 0.28292

434 -> 447 -0.23170

434 -> 451 0.34345

436 -> 454 0.10781

436 -> 458 -0.11003

436 -> 462 0.10615

Excited State 137: Singlet-A 4.0081 eV 309.33 nm f=0.0000 <S\*\*2>=0.000

408 -> 438 -0.13550

409 -> 440 -0.13660

410 -> 437 -0.17302

411 -> 439 0.13952

412 -> 438 0.11104  
430 -> 444 -0.10890  
430 -> 445 0.22481  
430 -> 450 -0.13296  
434 -> 446 0.26676  
434 -> 449 0.38895

Excited State 138: Singlet-A 4.0117 eV 309.06 nm f=0.0005 <S\*\*2>=0.000

408 -> 437 0.23147  
409 -> 439 0.24900  
410 -> 438 0.31025  
411 -> 440 -0.24048  
412 -> 437 -0.22834  
419 -> 438 -0.13184  
421 -> 440 -0.11000  
426 -> 441 0.20882  
436 -> 458 0.10703

Excited State 139: Singlet-A 4.0125 eV 308.99 nm f=0.0097 <S\*\*2>=0.000

403 -> 437 -0.10409  
404 -> 438 0.11919  
408 -> 439 0.17849  
409 -> 437 0.28775  
410 -> 440 0.24247  
411 -> 438 -0.27750  
412 -> 439 -0.17214  
415 -> 438 0.10237  
432 -> 447 0.10746  
433 -> 448 0.19981  
435 -> 454 0.15441  
436 -> 453 -0.12264

Excited State 140: Singlet-A 4.0128 eV 308.97 nm f=0.0003 <S\*\*2>=0.000

408 -> 438 0.17436  
409 -> 440 0.20556  
410 -> 437 0.26874

411 -> 439 -0.20099  
412 -> 438 -0.20934  
419 -> 437 -0.11648  
421 -> 439 -0.20271  
430 -> 445 0.12386  
433 -> 446 0.13708  
434 -> 446 0.14028  
434 -> 449 0.20580

Excited State 141: Singlet-A 4.0133 eV 308.93 nm f=0.0006 <S\*\*2>=0.000

403 -> 438 0.11661  
404 -> 437 -0.13961  
408 -> 440 -0.20500  
409 -> 438 -0.32503  
410 -> 439 -0.28695  
411 -> 437 0.32800  
412 -> 440 0.19528  
415 -> 437 -0.12210  
416 -> 438 0.10147

Excited State 142: Singlet-A 4.0160 eV 308.72 nm f=0.0064 <S\*\*2>=0.000

408 -> 439 -0.10184  
409 -> 437 -0.15461  
410 -> 440 -0.13484  
411 -> 438 0.14933  
429 -> 445 -0.12507  
432 -> 447 0.19244  
433 -> 448 0.36239  
435 -> 454 0.30848  
435 -> 458 0.10703  
436 -> 453 -0.22038

Excited State 143: Singlet-A 4.0181 eV 308.56 nm f=0.0000 <S\*\*2>=0.000

421 -> 440 -0.10954  
426 -> 441 -0.27118  
433 -> 447 -0.18373

434 -> 451 0.11161  
435 -> 453 0.44837  
436 -> 454 -0.21374  
436 -> 458 -0.20126

Excited State 144: Singlet-A 4.0248 eV 308.05 nm f=0.0000 <S\*\*2>=0.000

408 -> 438 0.11846  
410 -> 437 0.12631  
411 -> 439 -0.10451  
420 -> 437 -0.12276  
421 -> 439 0.59482  
422 -> 438 0.18917

Excited State 145: Singlet-A 4.0306 eV 307.60 nm f=0.0038 <S\*\*2>=0.000

418 -> 439 -0.10911  
420 -> 438 -0.23067  
421 -> 440 0.52918  
422 -> 437 0.22763

Excited State 146: Singlet-A 4.0359 eV 307.20 nm f=0.0000 <S\*\*2>=0.000

420 -> 437 -0.14975  
422 -> 438 0.10108  
432 -> 445 0.12357  
435 -> 455 0.49414  
436 -> 456 0.19184  
436 -> 459 0.35373

Excited State 147: Singlet-A 4.0363 eV 307.17 nm f=0.0094 <S\*\*2>=0.000

430 -> 451 -0.12419  
432 -> 447 -0.13398  
433 -> 448 -0.19385  
434 -> 448 -0.22624  
434 -> 452 0.37234  
435 -> 454 0.20809  
435 -> 458 0.15868  
436 -> 453 -0.11704

436 -> 457 0.18568  
436 -> 460 0.12735  
436 -> 465 0.11489

Excited State 148: Singlet-A 4.0380 eV 307.04 nm f=0.0000 <S\*\*2>=0.000

417 -> 439 -0.17614  
420 -> 437 0.46236  
421 -> 439 0.25953  
422 -> 438 -0.30129  
435 -> 455 0.16303  
436 -> 459 0.10942

Excited State 149: Singlet-A 4.0405 eV 306.85 nm f=0.0098 <S\*\*2>=0.000

426 -> 441 0.23701  
431 -> 445 0.15839  
432 -> 448 0.20038  
433 -> 447 0.35303  
434 -> 447 0.10637  
434 -> 451 -0.20444  
435 -> 453 0.30716  
436 -> 458 -0.15793

Excited State 150: Singlet-A 4.0437 eV 306.61 nm f=0.0061 <S\*\*2>=0.000

425 -> 441 -0.12518  
426 -> 443 0.13676  
432 -> 447 -0.19572  
433 -> 448 -0.18942  
434 -> 448 0.11508  
434 -> 450 0.13033  
434 -> 452 -0.18289  
435 -> 454 0.45609  
436 -> 453 -0.13398  
436 -> 457 -0.12980  
436 -> 460 -0.12875

Excited State 151: Singlet-A 4.0438 eV 306.60 nm f=0.0071 <S\*\*2>=0.000

417 -> 440 -0.10798  
420 -> 438 0.27454  
421 -> 440 0.24432  
422 -> 437 -0.14820  
434 -> 445 0.19645  
434 -> 450 0.41405

Excited State 152: Singlet-A 4.0438 eV 306.60 nm f=0.0043 <S\*\*2>=0.000

417 -> 440 -0.13974  
420 -> 438 0.35544  
421 -> 440 0.31805  
422 -> 437 -0.19163  
434 -> 445 -0.15285  
434 -> 450 -0.32225

Excited State 153: Singlet-A 4.0530 eV 305.91 nm f=0.0008 <S\*\*2>=0.000

428 -> 445 -0.10424  
430 -> 452 0.11297  
431 -> 445 0.35337  
431 -> 450 -0.11668  
431 -> 457 -0.10114  
432 -> 448 -0.12498  
433 -> 447 -0.30241  
434 -> 447 0.10693  
434 -> 451 -0.31925  
435 -> 453 -0.11235

Excited State 154: Singlet-A 4.0536 eV 305.86 nm f=0.0007 <S\*\*2>=0.000

417 -> 437 -0.12439  
422 -> 440 -0.12489  
432 -> 446 0.11529  
435 -> 456 0.57216  
435 -> 459 0.12688  
436 -> 455 0.25011

Excited State 155: Singlet-A 4.0561 eV 305.67 nm f=0.0008 <S\*\*2>=0.000



401 -> 438 -0.11503  
403 -> 437 -0.15225  
417 -> 438 0.35336  
418 -> 437 -0.29373  
419 -> 440 0.11022  
420 -> 440 -0.16119  
422 -> 439 0.35584  
436 -> 457 0.10192

Excited State 156: Singlet-A 4.0571 eV 305.60 nm f=0.0003 <S\*\*2>=0.000

401 -> 437 -0.10602  
403 -> 438 -0.13789  
417 -> 437 0.34477  
418 -> 438 -0.24236  
419 -> 439 0.11757  
420 -> 439 -0.15099  
422 -> 440 0.35810  
434 -> 450 0.12541  
435 -> 456 0.21202

Excited State 157: Singlet-A 4.0601 eV 305.38 nm f=0.0111 <S\*\*2>=0.000

431 -> 445 0.27205  
432 -> 452 -0.12163  
433 -> 451 -0.14766  
435 -> 457 0.19087  
435 -> 460 0.14351  
436 -> 458 0.44140  
436 -> 462 -0.19362

Excited State 158: Singlet-A 4.0642 eV 305.06 nm f=0.0000 <S\*\*2>=0.000

425 -> 441 -0.18881  
426 -> 443 0.19681  
430 -> 451 -0.11230  
432 -> 447 0.19188  
433 -> 448 0.15493  
433 -> 452 -0.15024

434 -> 448 -0.15428  
434 -> 452 0.29533  
435 -> 458 -0.17941  
435 -> 462 0.10035  
436 -> 457 -0.27046  
436 -> 460 -0.19351  
436 -> 465 -0.11787

Excited State 159: Singlet-A 4.0646 eV 305.03 nm f=0.0000 <S\*\*2>=0.000

419 -> 437 -0.11292  
425 -> 444 -0.19312  
426 -> 442 0.61120  
432 -> 445 -0.12245

Excited State 160: Singlet-A 4.0739 eV 304.34 nm f=0.0134 <S\*\*2>=0.000

404 -> 438 0.14356  
406 -> 437 -0.15300  
407 -> 440 0.12463  
408 -> 439 -0.10475  
425 -> 441 0.37290  
426 -> 443 -0.36479  
433 -> 448 -0.11419  
434 -> 452 0.10750  
436 -> 457 -0.15962  
436 -> 460 -0.12288

Excited State 161: Singlet-A 4.0760 eV 304.18 nm f=0.0000 <S\*\*2>=0.000

400 -> 437 0.10755  
402 -> 438 0.10405  
404 -> 439 0.22043  
405 -> 438 0.15292  
406 -> 440 -0.21263  
407 -> 437 0.23117  
408 -> 438 -0.16342  
412 -> 438 -0.11189  
419 -> 437 0.39547

420 -> 437 0.12799  
426 -> 442 0.19866

Excited State 162: Singlet-A 4.0790 eV 303.96 nm f=0.0175 <S\*\*2>=0.000

400 -> 438 0.10707  
402 -> 437 0.11200  
404 -> 440 0.24338  
405 -> 437 0.18207  
406 -> 439 -0.24648  
407 -> 438 0.26696  
408 -> 437 -0.20207  
411 -> 440 0.10410  
412 -> 437 -0.12539  
419 -> 438 0.35403  
420 -> 438 0.11444

Excited State 163: Singlet-A 4.0803 eV 303.86 nm f=0.0000 <S\*\*2>=0.000

429 -> 447 -0.10728  
432 -> 445 -0.21044  
432 -> 450 0.16585  
433 -> 446 0.35740  
433 -> 449 0.22958  
435 -> 455 0.12312  
435 -> 461 -0.14100  
435 -> 464 0.18062  
436 -> 463 0.32910

Excited State 164: Singlet-A 4.0807 eV 303.83 nm f=0.0009 <S\*\*2>=0.000

404 -> 437 -0.29350  
405 -> 440 -0.14872  
406 -> 438 0.29499  
407 -> 439 -0.24298  
408 -> 440 0.18715  
409 -> 438 0.10658  
411 -> 437 -0.15059  
412 -> 440 0.10103

419 -> 439 -0.16759  
432 -> 446 -0.14745  
433 -> 450 -0.10966

Excited State 165: Singlet-A 4.0849 eV 303.52 nm f=0.0432 <S\*\*2>=0.000

404 -> 438 -0.27543  
405 -> 439 -0.14194  
406 -> 437 0.28974  
407 -> 440 -0.22710  
408 -> 439 0.18572  
409 -> 437 0.10730  
411 -> 438 -0.14172  
418 -> 437 -0.10450  
419 -> 440 -0.14961  
425 -> 441 0.19752  
426 -> 443 -0.18199  
434 -> 452 0.10786

Excited State 166: Singlet-A 4.0882 eV 303.28 nm f=0.0071 <S\*\*2>=0.000

404 -> 437 0.11023  
406 -> 438 -0.11124  
432 -> 446 -0.21742  
432 -> 449 -0.17433  
433 -> 450 -0.22142  
435 -> 463 0.24409  
436 -> 461 -0.30737  
436 -> 464 0.31202

Excited State 167: Singlet-A 4.0959 eV 302.70 nm f=0.0000 <S\*\*2>=0.000

432 -> 445 -0.29383  
433 -> 446 0.19228  
434 -> 449 -0.12515  
435 -> 455 -0.19683  
435 -> 461 0.17588  
436 -> 456 -0.14145  
436 -> 459 0.46936

Excited State 168: Singlet-A 4.1038 eV 302.12 nm f=0.0032  $\langle S^2 \rangle = 0.000$

425 -> 442 -0.31081

426 -> 444 0.35497

431 -> 447 0.12464

432 -> 446 0.32688

433 -> 445 -0.25942

436 -> 461 -0.15147

Excited State 169: Singlet-A 4.1073 eV 301.87 nm f=0.0000  $\langle S^2 \rangle = 0.000$

400 -> 437 -0.10357

401 -> 439 0.11440

403 -> 440 0.11730

404 -> 439 0.10226

405 -> 438 0.17775

406 -> 440 -0.12277

407 -> 437 0.25550

408 -> 438 -0.13733

417 -> 439 -0.24295

418 -> 440 0.25192

419 -> 437 -0.24993

420 -> 437 -0.25274

Excited State 170: Singlet-A 4.1099 eV 301.67 nm f=0.0000  $\langle S^2 \rangle = 0.000$

430 -> 445 -0.16609

431 -> 448 0.18189

432 -> 445 0.22029

432 -> 450 0.15213

433 -> 446 -0.20910

433 -> 449 0.12620

434 -> 449 0.22613

435 -> 455 -0.23817

435 -> 464 0.14014

436 -> 456 -0.13000

436 -> 459 0.25457

436 -> 463 0.23526

Excited State 171: Singlet-A 4.1100 eV 301.66 nm f=0.0152 <S\*\*2>=0.000

|            |          |
|------------|----------|
| 400 -> 438 | 0.11766  |
| 401 -> 440 | -0.12414 |
| 403 -> 439 | -0.13302 |
| 405 -> 437 | -0.16444 |
| 407 -> 438 | -0.21595 |
| 408 -> 437 | 0.10870  |
| 416 -> 439 | -0.10756 |
| 417 -> 440 | 0.24289  |
| 418 -> 439 | -0.27837 |
| 419 -> 438 | 0.24100  |
| 420 -> 438 | 0.29306  |

Excited State 172: Singlet-A 4.1174 eV 301.12 nm f=0.0171 <S\*\*2>=0.000

|            |          |
|------------|----------|
| 418 -> 438 | -0.29005 |
| 420 -> 439 | 0.40396  |
| 422 -> 440 | -0.11809 |
| 425 -> 442 | 0.23559  |
| 426 -> 444 | -0.27592 |
| 432 -> 446 | 0.22996  |

Excited State 173: Singlet-A 4.1176 eV 301.11 nm f=0.0035 <S\*\*2>=0.000

|            |          |
|------------|----------|
| 418 -> 437 | -0.29854 |
| 420 -> 440 | 0.40867  |
| 422 -> 439 | -0.11389 |
| 431 -> 446 | -0.18860 |
| 432 -> 447 | -0.29126 |
| 433 -> 448 | 0.23141  |
| 434 -> 452 | 0.12168  |

Excited State 174: Singlet-A 4.1193 eV 300.98 nm f=0.0243 <S\*\*2>=0.000

|            |          |
|------------|----------|
| 418 -> 438 | -0.18689 |
| 420 -> 439 | 0.38000  |
| 422 -> 440 | -0.11052 |
| 425 -> 442 | -0.21536 |

426 -> 444 0.24569  
431 -> 447 -0.12042  
432 -> 446 -0.30234  
433 -> 445 0.12393  
436 -> 461 0.12500

Excited State 175: Singlet-A 4.1232 eV 300.70 nm f=0.0014 <S\*\*2>=0.000

418 -> 437 -0.23411  
420 -> 440 0.37800  
427 -> 445 0.10735  
431 -> 446 0.28856  
432 -> 447 0.28123  
433 -> 448 -0.25906

Excited State 176: Singlet-A 4.1322 eV 300.04 nm f=0.0130 <S\*\*2>=0.000

419 -> 438 0.13311  
428 -> 445 0.14663  
432 -> 448 0.56062  
433 -> 447 -0.28500

Excited State 177: Singlet-A 4.1324 eV 300.03 nm f=0.0005 <S\*\*2>=0.000

417 -> 439 -0.12917  
418 -> 440 0.14020  
419 -> 437 0.25685  
420 -> 437 -0.11604  
430 -> 445 0.16612  
431 -> 448 -0.19779  
431 -> 452 -0.10133  
432 -> 445 0.21314  
432 -> 448 -0.11503  
434 -> 449 -0.22014  
436 -> 463 0.17016

Excited State 178: Singlet-A 4.1360 eV 299.77 nm f=0.0000 <S\*\*2>=0.000

408 -> 438 0.10436  
410 -> 437 0.10830

417 -> 439 -0.12830  
418 -> 440 0.15402  
419 -> 437 0.37763  
430 -> 445 -0.18062  
431 -> 448 0.17867  
432 -> 445 -0.12708  
434 -> 449 0.21815  
436 -> 463 -0.11172

Excited State 179: Singlet-A 4.1402 eV 299.47 nm f=0.0016 <S\*\*2>=0.000

401 -> 438 0.10335  
403 -> 437 0.10527  
420 -> 440 -0.10568  
427 -> 444 -0.12302  
427 -> 445 0.19784  
428 -> 446 -0.11898  
429 -> 445 -0.15616  
431 -> 446 0.34765  
431 -> 449 -0.17128  
432 -> 447 -0.31117

Excited State 180: Singlet-A 4.1404 eV 299.45 nm f=0.0105 <S\*\*2>=0.000

406 -> 439 0.10213  
408 -> 437 0.11026  
410 -> 438 0.11549  
417 -> 440 -0.12729  
418 -> 439 0.17994  
419 -> 438 0.43792  
433 -> 451 -0.10705  
435 -> 465 0.10057  
436 -> 458 -0.17821  
436 -> 462 -0.20899

Excited State 181: Singlet-A 4.1412 eV 299.39 nm f=0.0001 <S\*\*2>=0.000

433 -> 450 -0.12679  
435 -> 456 -0.10950



435 -> 459 0.36021  
435 -> 463 0.12125  
436 -> 461 0.36359  
436 -> 464 0.28496  
436 -> 467 0.11074

Excited State 182: Singlet-A 4.1424 eV 299.30 nm f=0.0106 <S\*\*2>=0.000

400 -> 440 0.11431  
401 -> 438 -0.20193  
403 -> 437 -0.20807  
404 -> 438 -0.12240  
405 -> 439 -0.16862  
406 -> 437 0.17259  
407 -> 440 -0.12778  
413 -> 440 -0.12983  
414 -> 439 0.13653  
415 -> 438 0.15108  
416 -> 437 -0.17823  
418 -> 437 0.25768  
431 -> 446 0.13130  
432 -> 447 -0.19707

Excited State 183: Singlet-A 4.1430 eV 299.26 nm f=0.0113 <S\*\*2>=0.000

418 -> 439 0.10408  
419 -> 438 0.24749  
432 -> 452 0.14529  
433 -> 451 0.17867  
435 -> 453 0.16032  
435 -> 465 -0.17152  
436 -> 458 0.29896  
436 -> 462 0.39340

Excited State 184: Singlet-A 4.1447 eV 299.14 nm f=0.0003 <S\*\*2>=0.000

400 -> 439 0.11509  
401 -> 437 -0.20516  
403 -> 438 -0.19936

|            |          |
|------------|----------|
| 404 -> 437 | -0.12806 |
| 405 -> 440 | -0.15911 |
| 406 -> 438 | 0.17062  |
| 407 -> 439 | -0.12224 |
| 413 -> 439 | -0.13818 |
| 414 -> 440 | 0.13991  |
| 415 -> 437 | 0.17072  |
| 416 -> 438 | -0.17700 |
| 418 -> 438 | 0.30241  |
| 419 -> 439 | 0.13165  |
| 432 -> 446 | 0.10261  |
| 435 -> 459 | 0.12670  |
| 436 -> 461 | 0.11932  |

Excited State 185: Singlet-A 4.1563 eV 298.31 nm f=0.0016 <S\*\*2>=0.000

|            |          |
|------------|----------|
| 419 -> 439 | -0.12158 |
| 427 -> 443 | 0.10636  |
| 427 -> 448 | 0.12960  |
| 428 -> 447 | -0.10971 |
| 429 -> 448 | -0.11033 |
| 431 -> 447 | 0.44403  |
| 431 -> 451 | 0.16250  |
| 432 -> 446 | -0.20256 |
| 434 -> 450 | 0.18744  |
| 434 -> 460 | 0.10867  |

Excited State 186: Singlet-A 4.1641 eV 297.75 nm f=0.0022 <S\*\*2>=0.000

|            |          |
|------------|----------|
| 399 -> 437 | -0.10917 |
| 400 -> 438 | 0.13903  |
| 401 -> 440 | -0.13817 |
| 403 -> 439 | -0.13313 |
| 405 -> 437 | -0.18163 |
| 406 -> 439 | 0.11357  |
| 409 -> 439 | -0.10143 |
| 413 -> 438 | -0.16957 |
| 414 -> 437 | 0.15698  |

415 -> 440 0.20588  
416 -> 439 -0.20662  
417 -> 440 -0.10766  
418 -> 439 0.40642

Excited State 187: Singlet-A 4.1666 eV 297.57 nm f=0.0000 <S\*\*2>=0.000

399 -> 438 -0.10136  
400 -> 437 0.13401  
401 -> 439 -0.13323  
403 -> 440 -0.11967  
405 -> 438 -0.16970  
406 -> 440 0.11461  
413 -> 437 -0.18305  
414 -> 438 0.15851  
415 -> 439 0.22402  
416 -> 440 -0.20830  
417 -> 439 -0.14216  
418 -> 440 0.40088

Excited State 188: Singlet-A 4.1738 eV 297.05 nm f=0.0014 <S\*\*2>=0.000

419 -> 440 -0.23423  
429 -> 450 0.11719  
432 -> 451 0.26904  
433 -> 452 0.33727  
435 -> 458 -0.16986  
435 -> 462 -0.20304  
436 -> 457 -0.14742  
436 -> 460 -0.22902  
436 -> 465 0.20564

Excited State 189: Singlet-A 4.1744 eV 297.01 nm f=0.0001 <S\*\*2>=0.000

410 -> 439 0.11412  
413 -> 439 0.10055  
419 -> 439 0.61248  
431 -> 447 0.12491

Excited State 190: Singlet-A 4.1831 eV 296.39 nm f=0.0004 <S\*\*2>=0.000

410 -> 440 0.10320

419 -> 440 0.59613

432 -> 451 0.10514

433 -> 452 0.13324

436 -> 460 -0.10017

Excited State 191: Singlet-A 4.1898 eV 295.92 nm f=0.0000 <S\*\*2>=0.000

430 -> 445 0.39055

431 -> 448 0.46274

431 -> 452 0.11902

434 -> 449 -0.19184

Excited State 192: Singlet-A 4.1937 eV 295.64 nm f=0.0226 <S\*\*2>=0.000

429 -> 448 -0.10969

430 -> 446 -0.27266

430 -> 449 0.10544

432 -> 449 0.24279

433 -> 450 0.36315

434 -> 460 -0.11383

434 -> 465 -0.10052

436 -> 461 -0.10211

436 -> 464 0.23222

Excited State 193: Singlet-A 4.2023 eV 295.04 nm f=0.0042 <S\*\*2>=0.000

403 -> 438 -0.11611

413 -> 439 0.22233

414 -> 440 -0.23287

415 -> 437 -0.25775

416 -> 438 0.18872

417 -> 437 0.34542

418 -> 438 0.28118

420 -> 439 0.11329

Excited State 194: Singlet-A 4.2032 eV 294.98 nm f=0.0000 <S\*\*2>=0.000

401 -> 438 -0.10051

|            |          |
|------------|----------|
| 403 -> 437 | -0.14484 |
| 413 -> 440 | 0.24307  |
| 414 -> 439 | -0.26858 |
| 415 -> 438 | -0.26460 |
| 416 -> 437 | 0.22612  |
| 417 -> 438 | 0.31819  |
| 418 -> 437 | 0.22511  |
| 419 -> 440 | -0.11172 |
| 420 -> 440 | 0.12630  |

Excited State 195: Singlet-A 4.2043 eV 294.90 nm f=0.0155 <S\*\*2>=0.000

|            |          |
|------------|----------|
| 399 -> 437 | 0.17126  |
| 400 -> 438 | -0.23378 |
| 401 -> 440 | 0.13697  |
| 402 -> 437 | -0.15321 |
| 403 -> 439 | 0.15420  |
| 405 -> 437 | 0.13625  |
| 412 -> 437 | 0.10071  |
| 413 -> 438 | -0.23763 |
| 414 -> 437 | 0.28795  |
| 415 -> 440 | 0.25933  |
| 416 -> 439 | -0.25162 |
| 418 -> 439 | -0.11445 |

Excited State 196: Singlet-A 4.2056 eV 294.81 nm f=0.0000 <S\*\*2>=0.000

|            |          |
|------------|----------|
| 399 -> 438 | 0.17386  |
| 400 -> 437 | -0.24779 |
| 401 -> 439 | 0.14529  |
| 402 -> 438 | -0.15280 |
| 403 -> 440 | 0.15656  |
| 405 -> 438 | 0.13098  |
| 413 -> 437 | -0.24774 |
| 414 -> 438 | 0.26835  |
| 415 -> 439 | 0.26027  |
| 416 -> 440 | -0.23850 |
| 418 -> 440 | -0.14293 |

Excited State 197: Singlet-A 4.2057 eV 294.80 nm f=0.0016 <S\*\*2>=0.000

424 -> 441 0.13504

425 -> 441 0.47830

426 -> 443 0.48368

Excited State 198: Singlet-A 4.2136 eV 294.25 nm f=0.2458 <S\*\*2>=0.000

428 -> 445 -0.10440

430 -> 448 0.20834

432 -> 452 0.28827

433 -> 451 0.36598

434 -> 451 0.15343

436 -> 462 -0.32765

Excited State 199: Singlet-A 4.2139 eV 294.23 nm f=0.0004 <S\*\*2>=0.000

432 -> 450 0.27452

433 -> 449 0.41205

435 -> 464 -0.10898

436 -> 463 -0.34656

Excited State 200: Singlet-A 4.2242 eV 293.51 nm f=0.0031 <S\*\*2>=0.000

417 -> 438 -0.11047

428 -> 446 0.10584

429 -> 445 -0.17658

430 -> 447 -0.19846

431 -> 446 -0.15806

432 -> 451 -0.18912

433 -> 452 -0.25668

434 -> 452 -0.11422

435 -> 458 -0.20036

435 -> 462 -0.22666

436 -> 457 0.10243

436 -> 465 0.31947

**Table S7.** Standard orientation of the optimized geometry for the closed-ring isomer of [Ir( $\mu$ -Cl)(tBu-PIC)<sub>2</sub>]<sub>2</sub>.

| Symbol | Coordinates |           |           |    |           |           |           |
|--------|-------------|-----------|-----------|----|-----------|-----------|-----------|
|        | X           | Y         | Z         |    |           |           |           |
| Ir     | 0.002235    | 2.10252   | 0.001335  | C  | 6.859687  | 4.853046  | -0.973812 |
| C      | 0.068166    | 3.458041  | -1.500446 | C  | 8.059962  | 4.238091  | -0.328309 |
| C      | 6.71318     | 2.338744  | 0.45859   | C  | -4.478583 | 4.400378  | -2.31691  |
| C      | -6.707839   | 2.344271  | -0.460467 | C  | 5.450308  | 0.5477    | -3.513536 |
| N      | -4.239989   | 2.745517  | -0.411599 | C  | 4.48556   | 4.398668  | 2.315913  |
| Cl     | 0.00065     | -0.000013 | 1.68163   | C  | -0.100846 | 5.108673  | -3.817165 |
| C      | -3.808985   | 1.411108  | 1.415913  | C  | -1.124418 | 4.862126  | 3.208662  |
| N      | -2.056705   | 2.325491  | -0.351333 | C  | 0.109187  | 5.102725  | 3.824272  |
| N      | 2.061597    | 2.323194  | 0.353796  | C  | -5.449147 | 0.550245  | 3.51292   |
| N      | 4.24527     | 2.741599  | 0.413029  | C  | -8.054061 | 4.244458  | 0.325748  |
| O      | 9.187823    | 4.781184  | -0.440068 | C  | -1.259213 | 4.559541  | -3.266379 |
| O      | -9.181191   | 4.789727  | 0.434397  | C  | 1.267023  | 4.554407  | 3.271606  |
| C      | -3.234452   | 2.049572  | 0.2368    | C  | 8.753344  | 1.21242   | 2.106287  |
| C      | -5.167683   | 1.809333  | 1.489033  | C  | 10.286185 | 2.098297  | 0.328288  |
| C      | -2.33145    | 3.227218  | -1.407577 | C  | 4.349638  | 5.79554   | 2.19636   |
| C      | 1.188529    | 3.761046  | 2.113816  | C  | 5.360843  | 3.881287  | 3.288719  |
| C      | 3.238842    | 2.04656   | -0.235019 | C  | -6.986255 | 6.238726  | 1.650612  |
| C      | -5.524988   | 2.798581  | 0.349017  | C  | -5.343952 | 3.880218  | -3.297101 |
| C      | 2.337512    | 3.224766  | 1.409842  | C  | 9.584617  | 3.568476  | 2.278588  |
| C      | 1.211506    | 4.056147  | -2.061732 | C  | -10.28048 | 2.104679  | -0.337679 |
| C      | -1.181721   | 3.763925  | -2.110068 | C  | -7.502352 | 7.284991  | 0.62254   |
| C      | 5.170846    | 1.806231  | -1.489034 | C  | 5.950797  | 6.128284  | 3.98738   |
| C      | 3.812032    | 1.40865   | -1.415062 | C  | 5.077269  | 6.653158  | 3.026729  |
| C      | 5.529585    | 2.794813  | -0.348942 | C  | -9.107997 | 2.478372  | -1.28902  |
| C      | 3.274533    | 0.574966  | -2.400251 | C  | 6.992107  | 6.235228  | -1.648478 |
| C      | -1.204715   | 4.053642  | 2.06791   | C  | 6.088569  | 4.741456  | 4.118136  |
| C      | 5.993208    | 1.385859  | -2.52526  | C  | 5.628779  | 6.735043  | -2.183111 |
| C      | -3.272553   | 0.57684   | 2.401203  | C  | -4.35111  | 5.797609  | -2.193482 |
| C      | -4.106098   | 0.153657  | 3.446047  | C  | -7.97037  | 6.149135  | 2.851893  |
| C      | -5.692291   | 4.174775  | 0.947937  | C  | -8.744257 | 1.223254  | -2.114686 |
| C      | -0.061904   | 3.456287  | 1.504728  | C  | -9.575529 | 3.579971  | -2.283401 |
| C      | 5.696942    | 4.171519  | -0.946418 | C  | -5.62325  | 6.735614  | 2.18832   |
| C      | 7.904434    | 2.976937  | 0.469232  | C  | 7.974064  | 6.145905  | -2.8515   |
| C      | 1.132246    | 4.86665   | -3.201124 | C  | 7.512048  | 7.279052  | -0.619569 |
| C      | -3.692214   | 3.501761  | -1.445479 | C  | -5.077336 | 6.653045  | -3.027383 |
| C      | -5.990909   | 1.389169  | 2.524646  | C  | -6.070216 | 4.738164  | -4.130118 |
| C      | 3.698549    | 3.49833   | 1.447121  | C  | -5.940871 | 6.125477  | -3.995503 |
| C      | 9.115255    | 2.46938   | 1.282588  | Ir | -0.002447 | -2.101488 | 0.000216  |
| C      | -7.898259   | 2.983955  | -0.472869 | C  | 0.061418  | -3.45588  | 1.503049  |
| C      | 4.107103    | 0.151792  | -3.445862 | C  | 6.70686   | -2.34606  | -0.461239 |
| C      | -6.854389   | 4.857349  | 0.974293  | C  | -6.713502 | -2.339591 | 0.458231  |
|        |             |           |           | N  | -4.245568 | -2.740541 | 0.411569  |
|        |             |           |           | Cl | 0.000423  | 0.000928  | -1.680688 |

|   |           |           |           |   |           |           |           |
|---|-----------|-----------|-----------|---|-----------|-----------|-----------|
| C | -3.812875 | -1.407691 | -1.416578 | C | 1.259846  | -4.560214 | -3.2662   |
| N | -2.061974 | -2.321556 | 0.352482  | C | 8.741908  | -1.231542 | -2.123135 |
| N | 2.056535  | -2.325082 | -0.351861 | C | 10.280955 | -2.110455 | -0.347029 |
| N | 4.239448  | -2.746794 | -0.410117 | C | 4.352832  | -5.799361 | -2.188659 |
| O | 9.180833  | -4.788689 | 0.438725  | C | 5.342521  | -3.882926 | -3.296777 |
| O | -9.186277 | -4.784259 | -0.440274 | C | -6.989798 | -6.235635 | -1.649921 |
| C | -3.239269 | -2.045402 | -0.236562 | C | -5.352821 | -3.875533 | 3.295746  |
| C | -5.171592 | -1.805781 | -1.490461 | C | 9.5686    | -3.590228 | -2.286386 |
| C | -2.337904 | -3.223018 | 1.408705  | C | -10.28734 | -2.102453 | 0.334252  |
| C | 1.181901  | -3.763995 | -2.110334 | C | -7.507398 | -7.280168 | -0.620563 |
| C | 3.234015  | -2.049706 | 0.237029  | C | 5.941546  | -6.12879  | -3.991321 |
| C | -5.529922 | -2.794153 | -0.350217 | C | 5.079397  | -6.655543 | -3.021539 |
| C | 2.331447  | -3.227564 | -1.407367 | C | -9.114319 | -2.474444 | 1.285638  |
| C | 1.204018  | -4.054193 | 2.065627  | C | 6.9866    | -6.236179 | 1.657758  |
| C | -1.189051 | -3.760356 | 2.112094  | C | 6.069208  | -4.741576 | -4.128687 |
| C | 5.167466  | -1.806768 | 1.488252  | C | 5.624525  | -6.73167  | 2.199308  |
| C | 3.808565  | -1.409199 | 1.414976  | C | -4.358003 | -5.792475 | 2.19311   |
| C | 5.524587  | -2.798345 | 0.350317  | C | -7.972597 | -6.147753 | -2.852382 |
| C | 3.272182  | -0.573189 | 2.39879   | C | -8.752104 | -1.218753 | 2.111176  |
| C | -1.211551 | -4.054429 | -2.063889 | C | -9.580755 | -3.576184 | 2.280334  |
| C | 5.990955  | -1.384054 | 2.522608  | C | -5.626201 | -6.733484 | -2.185366 |
| C | -3.275633 | -0.574342 | -2.402201 | C | 7.973204  | -6.144262 | 2.856797  |
| C | -4.108337 | -0.151869 | -3.447993 | C | 7.500554  | -7.284835 | 0.630921  |
| C | -5.696397 | -4.170922 | -0.948003 | C | -5.085209 | -6.648253 | 3.025787  |
| C | -0.068261 | -3.456967 | -1.501768 | C | -6.079896 | -4.733826 | 4.127692  |
| C | 5.692023  | -4.173427 | 0.951853  | C | -5.950074 | -6.121081 | 3.992945  |
| C | 7.896877  | -2.986438 | -0.473947 | H | 6.837316  | 7.343219  | 0.242495  |
| C | 1.123457  | -4.863653 | 3.205665  | H | 8.511325  | 7.021098  | -0.265438 |
| C | -3.698864 | -3.496552 | 1.446078  | H | 7.554754  | 8.267352  | -1.092973 |
| C | -5.994042 | -1.386209 | -2.52695  | H | 8.970682  | 5.846546  | -2.523971 |
| C | 3.692131  | -3.502802 | -1.444298 | H | 7.61174   | 5.425018  | -3.594764 |
| C | 9.105384  | -2.484764 | -1.294383 | H | 8.044613  | 7.12599   | -3.338954 |
| C | -7.903954 | -2.979243 | 0.469719  | H | 5.763615  | 7.723875  | -2.634111 |
| C | 4.106026  | -0.147432 | 3.44235   | H | 5.222341  | 6.07321   | -2.957192 |
| C | -6.858577 | -4.853368 | -0.975345 | H | 4.886065  | 6.833507  | -1.382589 |
| C | 6.854032  | -4.856254 | 0.978575  | H | 7.945635  | 1.410758  | 2.820198  |
| C | 8.053269  | -4.244812 | 0.327865  | H | 8.44996   | 0.374951  | 1.467773  |
| C | -4.485999 | -4.395274 | 2.316623  | H | 9.633068  | 0.89379   | 2.675975  |
| C | 5.449265  | -0.543321 | 3.509411  | H | 10.406514 | 3.176625  | 2.889968  |
| C | 4.478555  | -4.402242 | -2.314895 | H | 9.938916  | 4.455075  | 1.750911  |
| C | -0.110218 | -5.104326 | 3.82108   | H | 8.768112  | 3.859593  | 2.949559  |
| C | -1.131891 | -4.865433 | -3.202896 | H | 11.127822 | 1.712991  | 0.91684   |
| C | 0.101553  | -5.108701 | -3.817748 | H | 9.982455  | 1.314749  | -0.376009 |
| C | -5.451435 | -0.548189 | -3.515497 | H | 10.623685 | 2.968991  | -0.235125 |
| C | -8.059187 | -4.239356 | -0.329716 | H | 9.982426  | -1.320644 | 0.352421  |
| C | -1.267839 | -4.554893 | 3.269053  | H | 10.617569 | -2.978154 | 0.221483  |



|   |           |           |           |   |           |           |           |
|---|-----------|-----------|-----------|---|-----------|-----------|-----------|
| H | 11.121862 | -1.732508 | -0.9414   | H | -2.227557 | -4.742962 | 3.736715  |
| H | 8.439616  | -0.391197 | -1.487874 | H | 5.221486  | -6.06534  | 2.9713    |
| H | 9.620606  | -0.915361 | -2.69573  | H | 4.879032  | -6.833484 | 1.401789  |
| H | 7.932893  | -1.433231 | -2.834618 | H | 5.759844  | -7.718324 | 2.654959  |
| H | 9.926081  | -4.473372 | -1.755039 | H | 7.613798  | -5.421618 | 3.599771  |
| H | 8.748025  | -3.886193 | -2.95027  | H | 8.045384  | -7.123273 | 3.346125  |
| H | 10.38638  | -3.202247 | -2.905687 | H | 8.968682  | -5.845963 | 2.524839  |
| H | -10.40128 | -3.186339 | 2.894848  | H | 7.543233  | -8.271439 | 1.107906  |
| H | -9.935596 | -4.461709 | 1.751235  | H | 6.822433  | -7.350867 | -0.228334 |
| H | -8.762583 | -3.86874  | 2.948652  | H | 8.49907   | -7.03031  | 0.272183  |
| H | -9.986808 | -1.314655 | -0.366654 | H | -6.551898 | -1.425655 | 1.017411  |
| H | -10.6225  | -2.971491 | -0.233039 | H | -4.797946 | -4.562047 | -1.410142 |
| H | -11.12956 | -1.722498 | 0.925429  | H | -4.794508 | 4.565304  | 1.411929  |
| H | -7.942384 | -1.417577 | 2.822666  | H | -6.545891 | 1.430312  | -1.019526 |
| H | -8.451261 | -0.379566 | 1.473659  | H | 6.550869  | 1.424798  | 1.017541  |
| H | -9.6308   | -0.902392 | 2.683629  | H | 4.798817  | 4.56338   | -1.408526 |
| H | -8.439373 | 0.385334  | -1.477452 | H | 5.451976  | 2.806023  | 3.401151  |
| H | -9.623618 | 0.904039  | -2.684583 | H | 6.753591  | 4.329918  | 4.87081   |
| H | -7.936959 | 1.424015  | -2.828407 | H | 6.514276  | 6.794514  | 4.632615  |
| H | -10.61658 | 2.973073  | 0.230053  | H | 4.960307  | 7.727403  | 2.926493  |
| H | -11.12248 | 1.724466  | -0.929028 | H | 3.663381  | 6.199812  | 1.459655  |
| H | -9.97901  | 1.316596  | 0.36251   | H | 2.226702  | 4.742412  | 3.73939   |
| H | -9.932921 | 4.464326  | -1.754047 | H | 0.169151  | 5.712911  | 4.719976  |
| H | -8.757145 | 3.874948  | -2.950401 | H | -2.03044  | 5.298063  | 3.621794  |
| H | -10.39439 | 3.188866  | -2.899308 | H | -2.177698 | 3.882543  | 1.626555  |
| H | -8.040337 | 7.128598  | 3.340719  | H | 2.235111  | -0.267662 | 2.355356  |
| H | -8.966853 | 5.851756  | 2.522172  | H | 3.693159  | 0.492507  | 4.215112  |
| H | -7.610337 | 5.426583  | 3.59465   | H | 6.072462  | -0.214661 | 4.334903  |
| H | -7.544789 | 8.272444  | 1.09775   | H | 7.024366  | -1.710014 | 2.578614  |
| H | -6.825421 | 7.349686  | -0.237773 | H | 2.237557  | 0.269269  | -2.356338 |
| H | -8.501142 | 7.028986  | 0.265742  | H | 3.693209  | -0.486065 | -4.21981  |
| H | -5.75756  | 7.723798  | 2.640962  | H | 6.072533  | 0.220975  | -4.340517 |
| H | -5.218571 | 6.071954  | 2.961675  | H | 7.026647  | 1.711699  | -2.5815   |
| H | -4.879334 | 6.834423  | 1.388907  | H | -2.184447 | -3.881601 | -1.623024 |
| H | -8.50693  | -7.023783 | -0.265968 | H | -2.038291 | -5.301392 | -3.61518  |
| H | -7.548822 | -8.268653 | -1.093725 | H | 0.161059  | -5.721139 | -4.711945 |
| H | -6.83218  | -7.343074 | 0.241215  | H | 2.219408  | -4.750387 | -3.733336 |
| H | -4.883717 | -6.833884 | -1.384863 | H | 3.675062  | -6.205219 | -1.445002 |
| H | -5.760654 | -7.721125 | -2.639132 | H | 4.970288  | -7.730123 | -2.916197 |
| H | -5.219822 | -6.06936  | -2.957511 | H | 6.504111  | -6.793896 | -4.638514 |
| H | -7.611086 | -5.427359 | -3.596506 | H | 6.725443  | -4.328727 | -4.888322 |
| H | -8.042973 | -7.128345 | -3.338835 | H | 5.425782  | -2.807497 | -3.413832 |
| H | -8.969271 | -5.848932 | -2.524517 | H | -5.428421 | 2.804678  | -3.412202 |
| H | 2.177053  | -3.883157 | 1.624336  | H | -3.67219  | 6.204078  | -1.451215 |
| H | 2.029314  | -5.300372 | 3.618334  | H | -4.96689  | 7.727696  | -2.924165 |
| H | -0.170414 | -5.71543  | 4.716144  | H | -6.503157 | 6.79001   | -4.64353  |

|   |           |           |           |   |           |           |           |
|---|-----------|-----------|-----------|---|-----------|-----------|-----------|
| H | -6.727464 | 4.324645  | -4.888509 | H | -2.235705 | 0.270599  | 2.357832  |
| H | -2.218499 | 4.74873   | -3.734462 | H | -3.693149 | -0.484779 | 4.220015  |
| H | -0.160026 | 5.720629  | -4.711714 | H | -6.072147 | 0.223412  | 4.339288  |
| H | 2.038677  | 5.303124  | -3.612793 | H | -7.024192 | 1.715589  | 2.580329  |
| H | 2.184147  | 3.884129  | -1.619937 | H | -7.027321 | -1.712547 | -2.583178 |
| H | -3.678149 | -6.19862  | 1.451516  | H | -2.238742 | -0.268354 | -2.358434 |
| H | -4.974471 | -7.722856 | 2.922389  | H | -3.694656 | 0.485774  | -4.222228 |
| H | -6.513015 | -6.785874 | 4.640136  | H | -6.073745 | -0.222018 | -4.342645 |
| H | -6.738206 | -4.320604 | 4.885323  | H | 4.794514  | -4.562725 | 1.417341  |
| H | -5.437715 | -2.800049 | 3.411002  | H | 6.544485  | -1.433506 | -1.02244  |

The Result for the TDDFT calculation

Excited State 1: Singlet-A 2.0448 eV 606.35 nm f=0.0000  $\langle S^2 \rangle = 0.000$

563 -> 565 -0.20285

563 -> 567 -0.11191

564 -> 565 0.66142

This state for optimization and/or second-order correction.

Total Energy, E(TD-HF/TD-DFT) = -7281.48422413

Copying the excited state density for this state as the 1-particle RhoCI density.

Excited State 2: Singlet-A 2.0912 eV 592.90 nm f=0.0000  $\langle S^2 \rangle = 0.000$

563 -> 565 -0.14423

563 -> 566 0.20914

563 -> 568 -0.10496

564 -> 566 0.63132

564 -> 567 0.13299

Excited State 3: Singlet-A 2.1032 eV 589.50 nm f=0.0000  $\langle S^2 \rangle = 0.000$

563 -> 565 -0.24107

563 -> 567 0.19379

564 -> 566 -0.16953

564 -> 567 0.59633

Excited State 4: Singlet-A 2.1368 eV 580.23 nm f=0.0001  $\langle S^2 \rangle = 0.000$

563 -> 566 -0.23547

563 -> 568 -0.19623

564 -> 568 0.62616

Excited State 5: Singlet-A 2.1950 eV 564.86 nm f=0.0003 <S\*\*2>=0.000  
563 -> 565 0.61290  
564 -> 565 0.18461  
564 -> 567 0.27380

Excited State 6: Singlet-A 2.2391 eV 553.72 nm f=0.0002 <S\*\*2>=0.000  
563 -> 566 0.60760  
563 -> 567 0.17271  
564 -> 566 -0.20483  
564 -> 568 0.20974

Excited State 7: Singlet-A 2.2490 eV 551.28 nm f=0.0002 <S\*\*2>=0.000  
563 -> 566 -0.14715  
563 -> 567 0.63563  
564 -> 565 0.10401  
564 -> 567 -0.20618  
564 -> 568 -0.11740

Excited State 8: Singlet-A 2.2885 eV 541.77 nm f=0.0003 <S\*\*2>=0.000  
563 -> 568 0.65987  
564 -> 566 0.11453  
564 -> 568 0.21424

Excited State 9: Singlet-A 2.5766 eV 481.18 nm f=0.0012 <S\*\*2>=0.000  
562 -> 565 0.69974

Excited State 10: Singlet-A 2.6156 eV 474.01 nm f=0.0111 <S\*\*2>=0.000  
562 -> 566 -0.10224  
563 -> 571 0.16194  
564 -> 569 0.67169

Excited State 11: Singlet-A 2.6251 eV 472.31 nm f=0.0003 <S\*\*2>=0.000  
562 -> 566 0.69005

Excited State 12: Singlet-A 2.6427 eV 469.16 nm f=0.0002 <S\*\*2>=0.000

562 -> 567 0.69734

Excited State 13: Singlet-A 2.6747 eV 463.55 nm f=0.0017 <S\*\*2>=0.000

558 -> 565 -0.16041

559 -> 565 0.25025

559 -> 567 0.10331

560 -> 565 0.16913

561 -> 565 0.50383

562 -> 568 -0.18204

563 -> 569 -0.18517

564 -> 571 -0.11986

Excited State 14: Singlet-A 2.6777 eV 463.02 nm f=0.0003 <S\*\*2>=0.000

561 -> 565 0.18806

562 -> 568 0.64728

Excited State 15: Singlet-A 2.6835 eV 462.02 nm f=0.0108 <S\*\*2>=0.000

561 -> 565 0.16532

562 -> 568 -0.14905

563 -> 569 0.54223

564 -> 571 0.35952

Excited State 16: Singlet-A 2.6877 eV 461.30 nm f=0.0206 <S\*\*2>=0.000

562 -> 568 -0.11730

563 -> 572 -0.17249

564 -> 570 0.66454

Excited State 17: Singlet-A 2.7229 eV 455.33 nm f=0.0001 <S\*\*2>=0.000

558 -> 567 -0.15167

559 -> 565 0.20005

559 -> 567 -0.22632

560 -> 565 0.33905

560 -> 567 -0.12757

561 -> 565 -0.19980

561 -> 566 0.17061

561 -> 567 0.39043

Excited State 18: Singlet-A 2.7364 eV 453.10 nm f=0.0007 <S\*\*2>=0.000

|            |          |
|------------|----------|
| 558 -> 566 | 0.16504  |
| 559 -> 566 | -0.25311 |
| 559 -> 568 | 0.11071  |
| 560 -> 565 | -0.14111 |
| 560 -> 566 | 0.18674  |
| 561 -> 566 | 0.50946  |
| 561 -> 567 | -0.10698 |
| 563 -> 570 | -0.14065 |
| 564 -> 572 | 0.10490  |

Excited State 19: Singlet-A 2.7493 eV 450.97 nm f=0.0078 <S\*\*2>=0.000

|            |          |
|------------|----------|
| 560 -> 565 | 0.25424  |
| 561 -> 566 | 0.15351  |
| 561 -> 567 | -0.22733 |
| 563 -> 570 | 0.43765  |
| 564 -> 572 | -0.32469 |

Excited State 20: Singlet-A 2.7508 eV 450.71 nm f=0.0026 <S\*\*2>=0.000

|            |          |
|------------|----------|
| 559 -> 565 | -0.13398 |
| 560 -> 565 | 0.50482  |
| 561 -> 567 | -0.23745 |
| 563 -> 570 | -0.29213 |
| 564 -> 572 | 0.21985  |

Excited State 21: Singlet-A 2.7742 eV 446.92 nm f=0.0007 <S\*\*2>=0.000

|            |          |
|------------|----------|
| 558 -> 568 | 0.15751  |
| 559 -> 566 | 0.16994  |
| 559 -> 568 | 0.21692  |
| 560 -> 566 | -0.30782 |
| 560 -> 568 | -0.14336 |
| 561 -> 566 | 0.15788  |
| 561 -> 568 | 0.45985  |
| 563 -> 570 | -0.10004 |

Excited State 22: Singlet-A 2.7978 eV 443.14 nm f=0.0002 <S\*\*2>=0.000  
559 -> 566 0.12816  
560 -> 566 0.58485  
560 -> 567 0.14875  
561 -> 568 0.27199

Excited State 23: Singlet-A 2.8081 eV 441.52 nm f=0.0001 <S\*\*2>=0.000  
560 -> 566 -0.11939  
560 -> 567 0.65634  
561 -> 565 -0.10235  
561 -> 567 0.12949  
561 -> 568 -0.10451

Excited State 24: Singlet-A 2.8260 eV 438.73 nm f=0.0025 <S\*\*2>=0.000  
563 -> 569 -0.38186  
564 -> 571 0.58602

Excited State 25: Singlet-A 2.8452 eV 435.77 nm f=0.0003 <S\*\*2>=0.000  
560 -> 568 0.67205  
561 -> 566 0.10131  
561 -> 568 0.15885

Excited State 26: Singlet-A 2.8688 eV 432.18 nm f=0.0005 <S\*\*2>=0.000  
559 -> 565 0.56929  
559 -> 567 0.11632  
561 -> 565 -0.24482  
561 -> 567 -0.27198

Excited State 27: Singlet-A 2.8867 eV 429.50 nm f=0.0015 <S\*\*2>=0.000  
563 -> 570 0.41807  
564 -> 572 0.56025

Excited State 28: Singlet-A 2.8927 eV 428.61 nm f=0.0005 <S\*\*2>=0.000  
563 -> 571 0.67365  
564 -> 569 -0.16544

Excited State 29: Singlet-A 2.9143 eV 425.44 nm f=0.0006 <S\*\*2>=0.000

|            |          |
|------------|----------|
| 556 -> 567 | 0.10065  |
| 559 -> 566 | 0.33723  |
| 559 -> 567 | 0.49927  |
| 561 -> 565 | -0.15843 |
| 561 -> 566 | 0.14706  |
| 561 -> 567 | 0.23667  |

Excited State 30: Singlet-A 2.9243 eV 423.98 nm f=0.0003 <S\*\*2>=0.000

|            |          |
|------------|----------|
| 559 -> 566 | 0.47937  |
| 559 -> 567 | -0.33759 |
| 559 -> 568 | -0.10345 |
| 561 -> 566 | 0.21887  |
| 561 -> 567 | -0.16045 |
| 561 -> 568 | -0.22452 |

Excited State 31: Singlet-A 2.9495 eV 420.36 nm f=0.0003 <S\*\*2>=0.000

|            |         |
|------------|---------|
| 563 -> 572 | 0.67212 |
| 564 -> 570 | 0.17804 |

Excited State 32: Singlet-A 2.9685 eV 417.67 nm f=0.0006 <S\*\*2>=0.000

|            |          |
|------------|----------|
| 556 -> 568 | -0.10721 |
| 559 -> 568 | 0.62017  |
| 561 -> 566 | -0.13861 |
| 561 -> 568 | -0.25831 |

Excited State 33: Singlet-A 3.0123 eV 411.59 nm f=0.0000 <S\*\*2>=0.000

|            |          |
|------------|----------|
| 556 -> 565 | -0.14764 |
| 557 -> 565 | 0.17304  |
| 558 -> 565 | 0.62116  |
| 561 -> 565 | 0.16795  |

Excited State 34: Singlet-A 3.0499 eV 406.52 nm f=0.0001 <S\*\*2>=0.000

|            |          |
|------------|----------|
| 557 -> 565 | 0.59054  |
| 558 -> 565 | -0.19118 |
| 558 -> 566 | 0.16406  |

558 -> 567 0.19919

Excited State 35: Singlet-A 3.0579 eV 405.46 nm f=0.0002 <S\*\*2>=0.000  
556 -> 566 0.19211  
557 -> 565 -0.15467  
558 -> 566 0.60129  
561 -> 566 -0.16779

Excited State 36: Singlet-A 3.0761 eV 403.05 nm f=0.0154 <S\*\*2>=0.000  
556 -> 565 -0.15728  
557 -> 565 -0.22910  
557 -> 567 -0.13180  
558 -> 567 0.46850  
561 -> 567 0.11665  
562 -> 569 0.37187

Excited State 37: Singlet-A 3.0797 eV 402.58 nm f=0.0398 <S\*\*2>=0.000  
557 -> 565 0.15791  
558 -> 567 -0.30972  
562 -> 569 0.57230

Excited State 38: Singlet-A 3.0991 eV 400.06 nm f=0.0001 <S\*\*2>=0.000  
556 -> 566 -0.22861  
556 -> 568 -0.15843  
557 -> 566 -0.31875  
558 -> 566 0.10972  
558 -> 568 0.50395  
561 -> 568 -0.16796

Excited State 39: Singlet-A 3.1123 eV 398.37 nm f=0.0004 <S\*\*2>=0.000  
557 -> 566 0.56442  
557 -> 567 0.21915  
558 -> 568 0.30902

Excited State 40: Singlet-A 3.1213 eV 397.22 nm f=0.0002 <S\*\*2>=0.000  
557 -> 566 -0.20187



|                                                                       |          |
|-----------------------------------------------------------------------|----------|
| 557 -> 567                                                            | 0.63597  |
| 558 -> 567                                                            | 0.13012  |
| 558 -> 568                                                            | -0.11912 |
| Excited State 41: Singlet-A 3.1434 eV 394.43 nm f=0.0010 <S**2>=0.000 |          |
| 555 -> 565                                                            | 0.45136  |
| 556 -> 565                                                            | 0.45166  |
| 556 -> 567                                                            | 0.11811  |
| 558 -> 567                                                            | 0.15610  |
| Excited State 42: Singlet-A 3.1626 eV 392.04 nm f=0.0004 <S**2>=0.000 |          |
| 556 -> 568                                                            | 0.11844  |
| 557 -> 568                                                            | 0.64220  |
| 562 -> 570                                                            | -0.22249 |
| Excited State 43: Singlet-A 3.1718 eV 390.90 nm f=0.0077 <S**2>=0.000 |          |
| 555 -> 565                                                            | -0.10907 |
| 555 -> 566                                                            | 0.17659  |
| 556 -> 565                                                            | 0.14544  |
| 556 -> 566                                                            | -0.15295 |
| 557 -> 568                                                            | 0.18346  |
| 562 -> 570                                                            | 0.56161  |
| Excited State 44: Singlet-A 3.1782 eV 390.10 nm f=0.0019 <S**2>=0.000 |          |
| 555 -> 565                                                            | 0.32323  |
| 555 -> 566                                                            | -0.21615 |
| 555 -> 567                                                            | -0.16573 |
| 556 -> 565                                                            | -0.26878 |
| 556 -> 566                                                            | 0.24171  |
| 556 -> 567                                                            | 0.16134  |
| 558 -> 566                                                            | -0.10087 |
| 558 -> 567                                                            | -0.10804 |
| 562 -> 570                                                            | 0.29913  |
| Excited State 45: Singlet-A 3.1869 eV 389.04 nm f=0.0012 <S**2>=0.000 |          |
| 555 -> 565                                                            | -0.22155 |

|                   |                                                     |
|-------------------|-----------------------------------------------------|
| 555 -> 566        | -0.29386                                            |
| 555 -> 567        | 0.21177                                             |
| 556 -> 565        | 0.19557                                             |
| 556 -> 566        | 0.35669                                             |
| 556 -> 567        | -0.22295                                            |
| 558 -> 566        | -0.10772                                            |
| 558 -> 567        | 0.12354                                             |
| 558 -> 568        | 0.14221                                             |
|                   |                                                     |
| Excited State 46: | Singlet-A 3.2024 eV 387.16 nm f=0.0006 <S**2>=0.000 |
| 557 -> 569        | -0.10967                                            |
| 560 -> 569        | -0.37344                                            |
| 562 -> 571        | 0.56360                                             |
|                   |                                                     |
| Excited State 47: | Singlet-A 3.2071 eV 386.60 nm f=0.0001 <S**2>=0.000 |
| 545 -> 565        | 0.39845                                             |
| 545 -> 567        | 0.16787                                             |
| 547 -> 565        | -0.39104                                            |
| 547 -> 567        | -0.13142                                            |
| 548 -> 565        | -0.25272                                            |
|                   |                                                     |
| Excited State 48: | Singlet-A 3.2181 eV 385.27 nm f=0.0010 <S**2>=0.000 |
| 555 -> 566        | 0.35037                                             |
| 555 -> 568        | 0.28236                                             |
| 556 -> 566        | 0.27743                                             |
| 556 -> 568        | 0.36231                                             |
| 558 -> 568        | 0.20513                                             |
|                   |                                                     |
| Excited State 49: | Singlet-A 3.2254 eV 384.40 nm f=0.0001 <S**2>=0.000 |
| 555 -> 565        | -0.33097                                            |
| 555 -> 567        | -0.31912                                            |
| 556 -> 565        | 0.22950                                             |
| 556 -> 567        | 0.40720                                             |
| 558 -> 565        | 0.11385                                             |
|                   |                                                     |
| Excited State 50: | Singlet-A 3.2454 eV 382.02 nm f=0.0002 <S**2>=0.000 |

544 -> 566 -0.16537  
546 -> 566 0.27896  
546 -> 568 -0.10774  
547 -> 566 -0.34410  
547 -> 568 0.12760  
548 -> 566 0.38253  
548 -> 568 -0.13644  
556 -> 566 0.10267

Excited State 51: Singlet-A 3.2477 eV 381.76 nm f=0.0003 <S\*\*2>=0.000

544 -> 567 0.12723  
545 -> 565 -0.17712  
545 -> 567 0.37439  
546 -> 567 0.22782  
547 -> 565 -0.10040  
547 -> 567 0.23905  
548 -> 567 0.18966  
556 -> 567 0.22931  
560 -> 569 0.12110

Excited State 52: Singlet-A 3.2509 eV 381.38 nm f=0.0039 <S\*\*2>=0.000

545 -> 567 -0.12062  
560 -> 569 0.46825  
562 -> 571 0.25072  
562 -> 572 0.36194

Excited State 53: Singlet-A 3.2556 eV 380.83 nm f=0.0002 <S\*\*2>=0.000

555 -> 566 0.39822  
555 -> 567 0.22863  
555 -> 568 -0.20087  
556 -> 566 0.23136  
556 -> 567 0.14944  
556 -> 568 -0.29470  
558 -> 566 -0.11152

Excited State 54: Singlet-A 3.2640 eV 379.85 nm f=0.0002 <S\*\*2>=0.000

|                                                                       |          |
|-----------------------------------------------------------------------|----------|
| 555 -> 566                                                            | -0.16633 |
| 555 -> 567                                                            | 0.47822  |
| 555 -> 568                                                            | 0.14032  |
| 556 -> 567                                                            | 0.31979  |
| 556 -> 568                                                            | 0.22325  |
| 558 -> 567                                                            | -0.10999 |
| Excited State 55: Singlet-A 3.2911 eV 376.73 nm f=0.0036 <S**2>=0.000 |          |
| 555 -> 568                                                            | 0.14885  |
| 556 -> 568                                                            | -0.12082 |
| 560 -> 569                                                            | 0.24601  |
| 560 -> 570                                                            | 0.40851  |
| 562 -> 571                                                            | 0.22638  |
| 562 -> 572                                                            | -0.37202 |
| Excited State 56: Singlet-A 3.2930 eV 376.51 nm f=0.0001 <S**2>=0.000 |          |
| 543 -> 568                                                            | 0.20756  |
| 544 -> 566                                                            | 0.16923  |
| 544 -> 568                                                            | 0.44033  |
| 546 -> 568                                                            | -0.14093 |
| 547 -> 568                                                            | -0.12743 |
| 548 -> 568                                                            | 0.17796  |
| 555 -> 568                                                            | -0.16137 |
| 556 -> 568                                                            | 0.18917  |
| 560 -> 570                                                            | 0.10192  |
| 562 -> 572                                                            | -0.10870 |
| Excited State 57: Singlet-A 3.2982 eV 375.91 nm f=0.0002 <S**2>=0.000 |          |
| 543 -> 568                                                            | 0.10297  |
| 544 -> 568                                                            | 0.21090  |
| 555 -> 568                                                            | 0.53741  |
| 556 -> 568                                                            | -0.26857 |
| Excited State 58: Singlet-A 3.3355 eV 371.71 nm f=0.0086 <S**2>=0.000 |          |
| 560 -> 569                                                            | -0.15662 |
| 560 -> 570                                                            | 0.51615  |

|                   |           |           |           |          |              |
|-------------------|-----------|-----------|-----------|----------|--------------|
| 562 -> 572        | 0.37217   |           |           |          |              |
| 564 -> 573        | 0.13502   |           |           |          |              |
| Excited State 59: | Singlet-A | 3.3544 eV | 369.62 nm | f=0.0001 | <S**2>=0.000 |
| 559 -> 569        | -0.10621  |           |           |          |              |
| 560 -> 570        | -0.12908  |           |           |          |              |
| 563 -> 574        | 0.13636   |           |           |          |              |
| 563 -> 575        | -0.16900  |           |           |          |              |
| 563 -> 578        | 0.10496   |           |           |          |              |
| 564 -> 573        | 0.58904   |           |           |          |              |
| Excited State 60: | Singlet-A | 3.3629 eV | 368.69 nm | f=0.0006 | <S**2>=0.000 |
| 553 -> 565        | 0.17638   |           |           |          |              |
| 553 -> 567        | 0.10535   |           |           |          |              |
| 554 -> 565        | 0.66221   |           |           |          |              |
| Excited State 61: | Singlet-A | 3.3691 eV | 368.00 nm | f=0.0111 | <S**2>=0.000 |
| 560 -> 571        | 0.40849   |           |           |          |              |
| 560 -> 572        | -0.13885  |           |           |          |              |
| 561 -> 569        | 0.43327   |           |           |          |              |
| 563 -> 573        | 0.19182   |           |           |          |              |
| 564 -> 574        | 0.10805   |           |           |          |              |
| 564 -> 575        | -0.15153  |           |           |          |              |
| Excited State 62: | Singlet-A | 3.3980 eV | 364.88 nm | f=0.0015 | <S**2>=0.000 |
| 560 -> 571        | -0.19523  |           |           |          |              |
| 560 -> 572        | 0.13378   |           |           |          |              |
| 561 -> 569        | 0.50780   |           |           |          |              |
| 563 -> 573        | -0.24008  |           |           |          |              |
| 564 -> 574        | -0.18653  |           |           |          |              |
| 564 -> 575        | 0.21056   |           |           |          |              |
| Excited State 63: | Singlet-A | 3.4094 eV | 363.66 nm | f=0.0010 | <S**2>=0.000 |
| 553 -> 566        | -0.19101  |           |           |          |              |
| 553 -> 568        | 0.10795   |           |           |          |              |
| 554 -> 566        | 0.64880   |           |           |          |              |

Excited State 64: Singlet-A 3.4160 eV 362.96 nm f=0.1337 <S\*\*2>=0.000

560 -> 571 0.45082

560 -> 572 0.18492

561 -> 569 -0.14183

561 -> 570 0.11243

563 -> 573 -0.27002

564 -> 574 -0.26009

564 -> 578 -0.13465

Excited State 65: Singlet-A 3.4226 eV 362.25 nm f=0.0001 <S\*\*2>=0.000

553 -> 565 0.21836

553 -> 567 -0.17839

554 -> 567 0.63162

Excited State 66: Singlet-A 3.4499 eV 359.39 nm f=0.1131 <S\*\*2>=0.000

555 -> 570 -0.10254

560 -> 572 0.49900

561 -> 570 0.33239

563 -> 573 0.15364

564 -> 574 0.13911

564 -> 575 -0.19251

Excited State 67: Singlet-A 3.4549 eV 358.86 nm f=0.0081 <S\*\*2>=0.000

553 -> 566 0.20245

553 -> 568 0.17611

554 -> 568 0.62422

Excited State 68: Singlet-A 3.4603 eV 358.31 nm f=0.0625 <S\*\*2>=0.000

558 -> 570 0.11654

559 -> 569 0.10891

560 -> 572 -0.21815

561 -> 570 0.52416

563 -> 576 0.13669

564 -> 574 0.16393

564 -> 575 0.24443

Excited State 69: Singlet-A 3.4653 eV 357.78 nm f=0.0489 <S\*\*2>=0.000

554 -> 568 -0.10569

559 -> 569 0.61026

561 -> 570 -0.11975

564 -> 573 0.12480

564 -> 576 0.16326

Excited State 70: Singlet-A 3.4780 eV 356.48 nm f=0.0115 <S\*\*2>=0.000

559 -> 569 -0.24390

563 -> 575 0.21480

563 -> 579 -0.11262

564 -> 574 0.12303

564 -> 575 0.17678

564 -> 576 0.49682

564 -> 577 0.17009

Excited State 71: Singlet-A 3.4974 eV 354.51 nm f=0.0037 <S\*\*2>=0.000

560 -> 571 0.14282

560 -> 572 0.22415

561 -> 570 -0.22734

563 -> 576 0.19636

564 -> 574 0.40867

564 -> 575 0.27727

564 -> 576 -0.22824

Excited State 72: Singlet-A 3.5340 eV 350.83 nm f=0.0002 <S\*\*2>=0.000

553 -> 565 0.63490

554 -> 565 -0.16403

554 -> 567 -0.23234

Excited State 73: Singlet-A 3.5380 eV 350.43 nm f=0.0494 <S\*\*2>=0.000

557 -> 570 0.11151

559 -> 570 0.62222

561 -> 572 0.13638

563 -> 574 -0.10359

564 -> 577 0.12464

Excited State 74: Singlet-A 3.5403 eV 350.21 nm f=0.0296 <S\*\*2>=0.000

560 -> 572 0.12920

563 -> 573 0.32905

563 -> 576 0.10992

563 -> 577 0.23682

564 -> 574 -0.32722

564 -> 575 0.23023

564 -> 577 -0.10369

564 -> 578 0.25129

564 -> 579 -0.15156

Excited State 75: Singlet-A 3.5451 eV 349.73 nm f=0.0211 <S\*\*2>=0.000

557 -> 569 -0.23354

558 -> 571 -0.12008

561 -> 571 0.62698

Excited State 76: Singlet-A 3.5746 eV 346.84 nm f=0.0140 <S\*\*2>=0.000

557 -> 569 0.18847

559 -> 570 -0.20726

563 -> 574 -0.36516

563 -> 578 0.16494

563 -> 579 -0.12772

564 -> 576 -0.12043

564 -> 577 0.40334

564 -> 578 0.15457

Excited State 77: Singlet-A 3.5785 eV 346.47 nm f=0.0002 <S\*\*2>=0.000

553 -> 566 0.62756

553 -> 567 0.11366

554 -> 566 0.18621

554 -> 568 -0.18772

Excited State 78: Singlet-A 3.5860 eV 345.75 nm f=0.0045 <S\*\*2>=0.000

553 -> 567 -0.11236



559 -> 571 -0.10219  
563 -> 573 0.31403  
563 -> 577 -0.19868  
564 -> 575 0.28432  
564 -> 578 -0.13063  
564 -> 579 0.40568

Excited State 79: Singlet-A 3.5896 eV 345.40 nm f=0.0015 <S\*\*2>=0.000

553 -> 566 -0.10363  
553 -> 567 0.63667  
554 -> 565 -0.10001  
554 -> 567 0.17706  
557 -> 569 -0.11383

Excited State 80: Singlet-A 3.5912 eV 345.24 nm f=0.0290 <S\*\*2>=0.000

553 -> 567 0.12429  
557 -> 569 0.57225  
561 -> 571 0.22210  
562 -> 571 0.10045  
563 -> 574 0.16407  
564 -> 577 -0.10025

Excited State 81: Singlet-A 3.5981 eV 344.58 nm f=0.0003 <S\*\*2>=0.000

555 -> 569 -0.10847  
558 -> 569 -0.34681  
559 -> 571 0.54213  
564 -> 578 -0.10996

Excited State 82: Singlet-A 3.6008 eV 344.32 nm f=0.0012 <S\*\*2>=0.000

558 -> 569 0.10823  
559 -> 571 -0.10817  
563 -> 574 0.41282  
563 -> 575 -0.22060  
563 -> 578 0.18453  
563 -> 579 -0.11690  
564 -> 573 -0.23575

|                                                                       |          |
|-----------------------------------------------------------------------|----------|
| 564 -> 577                                                            | 0.18716  |
| 564 -> 580                                                            | -0.12500 |
| 564 -> 581                                                            | -0.18284 |
| Excited State 83: Singlet-A 3.6078 eV 343.65 nm f=0.0195 <S**2>=0.000 |          |
| 556 -> 570                                                            | 0.11843  |
| 557 -> 570                                                            | 0.12416  |
| 558 -> 572                                                            | 0.14061  |
| 559 -> 570                                                            | -0.10881 |
| 561 -> 572                                                            | 0.63492  |
| Excited State 84: Singlet-A 3.6173 eV 342.75 nm f=0.0196 <S**2>=0.000 |          |
| 555 -> 569                                                            | -0.11622 |
| 558 -> 569                                                            | -0.29443 |
| 563 -> 573                                                            | -0.20547 |
| 563 -> 575                                                            | -0.15898 |
| 563 -> 576                                                            | -0.17297 |
| 563 -> 580                                                            | -0.13220 |
| 564 -> 577                                                            | -0.10520 |
| 564 -> 578                                                            | 0.40383  |
| 564 -> 579                                                            | 0.20884  |
| Excited State 85: Singlet-A 3.6286 eV 341.68 nm f=0.0001 <S**2>=0.000 |          |
| 553 -> 568                                                            | 0.66687  |
| 554 -> 566                                                            | -0.10928 |
| 554 -> 568                                                            | -0.19250 |
| Excited State 86: Singlet-A 3.6314 eV 341.42 nm f=0.0021 <S**2>=0.000 |          |
| 555 -> 569                                                            | 0.17713  |
| 557 -> 571                                                            | 0.11896  |
| 558 -> 569                                                            | 0.30187  |
| 559 -> 571                                                            | 0.28099  |
| 563 -> 574                                                            | -0.12472 |
| 563 -> 575                                                            | -0.30088 |
| 564 -> 575                                                            | 0.12527  |
| 564 -> 576                                                            | 0.14828  |

564 -> 578 0.12093  
564 -> 580 -0.24964

Excited State 87: Singlet-A 3.6358 eV 341.01 nm f=0.0043 <S\*\*2>=0.000

555 -> 569 0.14152  
558 -> 569 0.21178  
559 -> 571 0.22603  
563 -> 574 0.14943  
563 -> 575 0.23099  
563 -> 576 -0.19456  
563 -> 579 -0.12311  
564 -> 576 -0.20276  
564 -> 578 0.22150  
564 -> 579 0.11688  
564 -> 580 0.30071  
564 -> 581 -0.11012

Excited State 88: Singlet-A 3.6621 eV 338.56 nm f=0.0016 <S\*\*2>=0.000

563 -> 575 0.32544  
563 -> 576 0.28311  
563 -> 578 0.15298  
563 -> 579 0.19694  
563 -> 580 -0.15200  
564 -> 575 -0.13440  
564 -> 579 0.24519  
564 -> 580 -0.31535

Excited State 89: Singlet-A 3.6649 eV 338.30 nm f=0.0012 <S\*\*2>=0.000

557 -> 570 -0.11923  
563 -> 575 -0.17417  
563 -> 576 0.42809  
563 -> 578 -0.17748  
563 -> 579 -0.14252  
563 -> 580 -0.15238  
564 -> 576 0.12683  
564 -> 579 0.21663

564 -> 580 0.28589

Excited State 90: Singlet-A 3.6702 eV 337.82 nm f=0.0059 <S\*\*2>=0.000  
555 -> 570 -0.10525  
558 -> 570 -0.37310  
559 -> 572 0.56223

Excited State 91: Singlet-A 3.6807 eV 336.85 nm f=0.0162 <S\*\*2>=0.000  
557 -> 570 0.59940  
558 -> 571 0.11661  
561 -> 572 -0.18699  
563 -> 575 -0.11218

Excited State 92: Singlet-A 3.6952 eV 335.53 nm f=0.0001 <S\*\*2>=0.000  
555 -> 570 0.24653  
557 -> 571 0.14586  
557 -> 572 0.22188  
558 -> 570 0.44455  
559 -> 572 0.33216  
560 -> 572 0.13835  
561 -> 570 -0.11461

Excited State 93: Singlet-A 3.7232 eV 333.01 nm f=0.0040 <S\*\*2>=0.000  
563 -> 574 0.17722  
563 -> 582 0.19480  
563 -> 583 -0.11054  
564 -> 577 0.20758  
564 -> 581 0.56526

Excited State 94: Singlet-A 3.7297 eV 332.42 nm f=0.0162 <S\*\*2>=0.000  
555 -> 569 0.52572  
556 -> 571 -0.13527  
557 -> 571 0.24382  
558 -> 569 -0.32203

Excited State 95: Singlet-A 3.7499 eV 330.63 nm f=0.0573 <S\*\*2>=0.000

555 -> 569 0.10647  
557 -> 571 -0.27197  
563 -> 577 0.22625  
563 -> 578 0.12477  
563 -> 581 0.26315  
564 -> 582 0.42737  
564 -> 583 -0.21044

Excited State 96: Singlet-A 3.7601 eV 329.74 nm f=0.0034 <S\*\*2>=0.000

556 -> 569 -0.10711  
563 -> 575 -0.10990  
563 -> 577 -0.10175  
563 -> 578 0.33322  
563 -> 579 0.23022  
563 -> 584 0.11832  
564 -> 576 0.12006  
564 -> 580 0.26614  
564 -> 582 0.15810  
564 -> 583 0.36406

Excited State 97: Singlet-A 3.7622 eV 329.55 nm f=0.1143 <S\*\*2>=0.000

555 -> 569 -0.25936  
555 -> 570 -0.10067  
556 -> 569 -0.11312  
557 -> 571 0.47990  
558 -> 570 -0.11945  
559 -> 572 -0.10637  
563 -> 577 0.13643  
563 -> 581 0.11132  
564 -> 582 0.17347  
564 -> 583 -0.15252

Excited State 98: Singlet-A 3.7646 eV 329.35 nm f=0.0769 <S\*\*2>=0.000

556 -> 569 0.59015  
557 -> 571 0.10653  
558 -> 571 0.28924

Excited State 99: Singlet-A 3.7860 eV 327.48 nm f=0.0077 <S\*\*2>=0.000

|            |          |
|------------|----------|
| 555 -> 571 | 0.33359  |
| 556 -> 569 | -0.23971 |
| 558 -> 571 | 0.40291  |
| 558 -> 572 | -0.12872 |
| 563 -> 578 | -0.20761 |
| 564 -> 577 | 0.12523  |
| 564 -> 581 | -0.13806 |

Excited State 100: Singlet-A 3.7956 eV 326.66 nm f=0.0052 <S\*\*2>=0.000

|            |          |
|------------|----------|
| 555 -> 570 | 0.20299  |
| 558 -> 571 | 0.13768  |
| 563 -> 577 | 0.15067  |
| 563 -> 578 | 0.29050  |
| 563 -> 579 | -0.11378 |
| 563 -> 580 | -0.29016 |
| 563 -> 581 | -0.13040 |
| 563 -> 583 | -0.12162 |
| 563 -> 584 | -0.10905 |
| 564 -> 578 | -0.22075 |
| 564 -> 582 | -0.18813 |
| 564 -> 583 | -0.14207 |

Excited State 101: Singlet-A 3.7985 eV 326.40 nm f=0.0048 <S\*\*2>=0.000

|            |          |
|------------|----------|
| 555 -> 570 | 0.22924  |
| 558 -> 570 | -0.10347 |
| 558 -> 571 | -0.13479 |
| 558 -> 572 | 0.10070  |
| 563 -> 577 | 0.29940  |
| 563 -> 578 | -0.21822 |
| 563 -> 579 | 0.17053  |
| 563 -> 580 | -0.23323 |
| 563 -> 584 | 0.11292  |
| 564 -> 577 | 0.23977  |
| 564 -> 581 | -0.13594 |

564 -> 583 0.18120

Excited State 102: Singlet-A 3.8006 eV 326.22 nm f=0.0040 <S\*\*2>=0.000

555 -> 570 0.41355

556 -> 572 0.14286

557 -> 572 0.18216

558 -> 570 -0.26314

563 -> 580 0.20250

563 -> 583 0.16990

564 -> 584 0.24127

Excited State 103: Singlet-A 3.8068 eV 325.69 nm f=0.0017 <S\*\*2>=0.000

555 -> 570 -0.15916

557 -> 572 -0.11365

558 -> 570 0.11368

563 -> 577 0.25296

563 -> 579 -0.10767

563 -> 581 -0.15324

563 -> 582 0.15202

563 -> 583 0.21994

564 -> 578 -0.12005

564 -> 579 0.12406

564 -> 583 0.12220

564 -> 584 0.42357

Excited State 104: Singlet-A 3.8107 eV 325.36 nm f=0.0084 <S\*\*2>=0.000

557 -> 572 -0.10515

563 -> 577 0.22585

563 -> 579 -0.14265

563 -> 580 0.42142

563 -> 583 -0.10309

564 -> 579 0.25753

564 -> 583 0.13290

564 -> 584 -0.30489

Excited State 105: Singlet-A 3.8145 eV 325.04 nm f=0.0031 <S\*\*2>=0.000

558 -> 572 0.11147  
563 -> 579 0.41062  
563 -> 580 0.21378  
563 -> 584 -0.21908  
564 -> 577 0.11110  
564 -> 580 0.20687  
564 -> 582 -0.18914  
564 -> 583 -0.26532

Excited State 106: Singlet-A 3.8296 eV 323.75 nm f=0.0781 <S\*\*2>=0.000

556 -> 570 0.60514  
558 -> 572 -0.22572  
563 -> 579 0.12244  
564 -> 581 -0.11533

Excited State 107: Singlet-A 3.8329 eV 323.48 nm f=0.0396 <S\*\*2>=0.000

555 -> 569 0.10811  
555 -> 570 -0.27378  
557 -> 572 0.55243  
563 -> 577 0.15648

Excited State 108: Singlet-A 3.8437 eV 322.56 nm f=0.0082 <S\*\*2>=0.000

555 -> 572 0.34824  
556 -> 570 0.19859  
557 -> 570 -0.16605  
558 -> 571 0.14059  
558 -> 572 0.43739  
561 -> 572 -0.10098  
562 -> 573 -0.17937  
563 -> 579 -0.11068

Excited State 109: Singlet-A 3.8632 eV 320.94 nm f=0.0152 <S\*\*2>=0.000

558 -> 572 0.16446  
562 -> 573 0.61019  
562 -> 577 0.10935



Excited State 110: Singlet-A 3.8744 eV 320.00 nm f=0.0008 <S\*\*2>=0.000

563 -> 576 -0.10679

563 -> 581 0.56182

564 -> 582 -0.30537

564 -> 583 0.18153

Excited State 111: Singlet-A 3.9069 eV 317.34 nm f=0.0105 <S\*\*2>=0.000

555 -> 571 0.54941

556 -> 569 0.16144

558 -> 571 -0.34634

563 -> 582 0.10078

Excited State 112: Singlet-A 3.9126 eV 316.88 nm f=0.0016 <S\*\*2>=0.000

555 -> 571 -0.10279

563 -> 582 0.54839

563 -> 583 -0.32615

564 -> 581 -0.17007

Excited State 113: Singlet-A 3.9332 eV 315.22 nm f=0.0042 <S\*\*2>=0.000

554 -> 569 0.29475

556 -> 571 0.60314

559 -> 571 -0.11888

Excited State 114: Singlet-A 3.9553 eV 313.46 nm f=0.0004 <S\*\*2>=0.000

557 -> 572 0.11264

557 -> 573 -0.11419

562 -> 574 0.50755

562 -> 575 -0.36058

562 -> 576 0.12568

562 -> 578 0.16225

Excited State 115: Singlet-A 3.9591 eV 313.16 nm f=0.0109 <S\*\*2>=0.000

555 -> 572 0.54891

556 -> 570 -0.15067

558 -> 572 -0.35158

Excited State 116: Singlet-A 3.9685 eV 312.42 nm f=0.0002 <S\*\*2>=0.000  
552 -> 565 0.48068  
554 -> 569 -0.38705  
556 -> 571 0.18854  
556 -> 572 0.18763

Excited State 117: Singlet-A 3.9692 eV 312.36 nm f=0.0009 <S\*\*2>=0.000  
552 -> 565 0.48705  
554 -> 569 0.36927  
556 -> 571 -0.17319  
556 -> 572 -0.19814

Excited State 118: Singlet-A 3.9729 eV 312.08 nm f=0.0001 <S\*\*2>=0.000  
554 -> 569 -0.14335  
563 -> 582 0.27826  
563 -> 583 0.47129  
564 -> 584 -0.35110

Excited State 119: Singlet-A 3.9751 eV 311.91 nm f=0.0055 <S\*\*2>=0.000  
562 -> 575 0.28579  
562 -> 576 0.52101  
562 -> 577 0.23196

Excited State 120: Singlet-A 3.9847 eV 311.15 nm f=0.0057 <S\*\*2>=0.000  
554 -> 569 0.27240  
554 -> 570 0.15012  
556 -> 571 -0.11830  
556 -> 572 0.57308  
559 -> 572 0.11107

Excited State 121: Singlet-A 3.9906 eV 310.69 nm f=0.0009 <S\*\*2>=0.000  
563 -> 584 0.60463  
564 -> 582 -0.14462  
564 -> 583 -0.24932

Excited State 122: Singlet-A 3.9976 eV 310.15 nm f=0.0009 <S\*\*2>=0.000

|                    |                                                     |
|--------------------|-----------------------------------------------------|
| 560 -> 573         | -0.11750                                            |
| 562 -> 574         | 0.33103                                             |
| 562 -> 575         | 0.44614                                             |
| 562 -> 576         | -0.25525                                            |
| 562 -> 578         | 0.11243                                             |
| 562 -> 579         | -0.15005                                            |
|                    |                                                     |
| Excited State 123: | Singlet-A 4.0142 eV 308.86 nm f=0.0118 <S**2>=0.000 |
| 560 -> 573         | 0.58424                                             |
| 560 -> 577         | 0.11224                                             |
| 562 -> 574         | 0.10148                                             |
| 562 -> 575         | 0.11106                                             |
| 563 -> 585         | 0.10731                                             |
|                    |                                                     |
| Excited State 124: | Singlet-A 4.0163 eV 308.70 nm f=0.0002 <S**2>=0.000 |
| 552 -> 566         | 0.68305                                             |
|                    |                                                     |
| Excited State 125: | Singlet-A 4.0317 eV 307.52 nm f=0.0004 <S**2>=0.000 |
| 549 -> 565         | -0.12665                                            |
| 550 -> 565         | -0.11313                                            |
| 552 -> 567         | 0.66043                                             |
|                    |                                                     |
| Excited State 126: | Singlet-A 4.0399 eV 306.90 nm f=0.0096 <S**2>=0.000 |
| 553 -> 569         | 0.21618                                             |
| 554 -> 571         | -0.17764                                            |
| 561 -> 573         | -0.11686                                            |
| 563 -> 585         | -0.14484                                            |
| 563 -> 586         | 0.16110                                             |
| 564 -> 585         | 0.39814                                             |
| 564 -> 586         | 0.21631                                             |
| 564 -> 591         | 0.12586                                             |
| 564 -> 593         | -0.11939                                            |
|                    |                                                     |
| Excited State 127: | Singlet-A 4.0447 eV 306.54 nm f=0.0004 <S**2>=0.000 |
| 553 -> 572         | 0.14289                                             |
| 554 -> 570         | 0.65624                                             |

556 -> 572 -0.15918

Excited State 128: Singlet-A 4.0630 eV 305.15 nm f=0.0144 <S\*\*2>=0.000

539 -> 565 0.10404

549 -> 565 0.10413

550 -> 565 0.10746

551 -> 565 0.12741

552 -> 568 -0.12272

553 -> 569 0.46052

554 -> 571 -0.32235

564 -> 585 -0.15155

Excited State 129: Singlet-A 4.0658 eV 304.94 nm f=0.0010 <S\*\*2>=0.000

541 -> 566 -0.12443

542 -> 566 0.21701

543 -> 566 0.15176

546 -> 566 0.12896

549 -> 566 -0.12007

551 -> 565 -0.11073

552 -> 568 0.49686

553 -> 569 0.12194

Excited State 130: Singlet-A 4.0697 eV 304.65 nm f=0.0016 <S\*\*2>=0.000

541 -> 566 0.16826

542 -> 566 -0.23481

542 -> 568 0.12030

543 -> 566 -0.19974

546 -> 566 -0.13947

548 -> 566 0.11262

549 -> 565 0.10244

551 -> 565 0.14126

552 -> 568 0.42544

Excited State 131: Singlet-A 4.0706 eV 304.58 nm f=0.0128 <S\*\*2>=0.000

539 -> 565 0.13897

540 -> 565 0.11099

|            |          |
|------------|----------|
| 541 -> 566 | -0.13848 |
| 542 -> 566 | 0.20431  |
| 543 -> 565 | -0.13469 |
| 543 -> 566 | 0.12598  |
| 546 -> 566 | 0.12687  |
| 549 -> 565 | 0.19839  |
| 550 -> 565 | 0.21293  |
| 551 -> 565 | 0.24639  |
| 552 -> 567 | 0.10108  |
| 553 -> 569 | -0.20236 |
| 554 -> 571 | 0.13749  |
| 564 -> 585 | 0.10484  |

Excited State 132: Singlet-A 4.0767 eV 304.13 nm f=0.0103 <S\*\*2>=0.000

|            |          |
|------------|----------|
| 551 -> 565 | -0.26897 |
| 559 -> 573 | 0.13919  |
| 560 -> 573 | -0.17890 |
| 561 -> 575 | 0.15252  |
| 563 -> 585 | 0.21141  |
| 563 -> 586 | 0.18945  |
| 564 -> 585 | -0.16701 |
| 564 -> 586 | 0.35010  |

Excited State 133: Singlet-A 4.0790 eV 303.96 nm f=0.0026 <S\*\*2>=0.000

|            |          |
|------------|----------|
| 539 -> 565 | -0.25186 |
| 540 -> 565 | -0.17205 |
| 549 -> 565 | -0.10206 |
| 551 -> 565 | 0.50927  |
| 564 -> 586 | 0.13327  |

Excited State 134: Singlet-A 4.0903 eV 303.12 nm f=0.0040 <S\*\*2>=0.000

|            |          |
|------------|----------|
| 557 -> 577 | -0.10329 |
| 561 -> 573 | -0.10739 |
| 562 -> 574 | -0.24926 |
| 562 -> 577 | -0.11889 |
| 562 -> 578 | 0.47074  |

562 -> 579 -0.28032  
562 -> 582 -0.12968

Excited State 135: Singlet-A 4.0916 eV 303.02 nm f=0.0019 <S\*\*2>=0.000

558 -> 576 0.10339  
559 -> 574 -0.15846  
559 -> 575 0.13469  
561 -> 573 0.51540  
564 -> 589 -0.13211

Excited State 136: Singlet-A 4.0991 eV 302.47 nm f=0.0010 <S\*\*2>=0.000

541 -> 568 0.18795  
542 -> 566 0.19744  
542 -> 568 0.34147  
543 -> 566 -0.11621  
543 -> 568 -0.31236  
546 -> 568 -0.17037  
547 -> 568 -0.11826  
548 -> 568 0.20753  
552 -> 568 -0.10216  
561 -> 573 0.13373

Excited State 137: Singlet-A 4.1097 eV 301.68 nm f=0.0006 <S\*\*2>=0.000

538 -> 567 -0.17868  
539 -> 565 -0.20984  
549 -> 565 0.19560  
549 -> 567 -0.15029  
550 -> 565 0.32641  
550 -> 567 -0.14266  
551 -> 565 -0.12019  
551 -> 567 0.13457  
552 -> 567 0.15678  
560 -> 574 -0.18742  
560 -> 575 0.13239

Excited State 138: Singlet-A 4.1111 eV 301.58 nm f=0.0125 <S\*\*2>=0.000

550 -> 565 0.13417  
558 -> 573 0.10898  
560 -> 574 0.40202  
560 -> 575 -0.29886  
560 -> 578 0.12740  
564 -> 585 -0.13052  
564 -> 593 0.11078

Excited State 139: Singlet-A 4.1254 eV 300.54 nm f=0.0003 <S\*\*2>=0.000

550 -> 566 0.12213  
551 -> 566 -0.23469  
559 -> 573 0.14831  
560 -> 575 -0.13319  
560 -> 576 -0.24041  
560 -> 577 -0.10678  
561 -> 574 -0.22754  
562 -> 578 0.13116  
562 -> 579 0.35628

Excited State 140: Singlet-A 4.1266 eV 300.45 nm f=0.0020 <S\*\*2>=0.000

550 -> 566 -0.15630  
551 -> 566 0.49470  
562 -> 578 0.16476  
562 -> 579 0.29011

Excited State 141: Singlet-A 4.1269 eV 300.43 nm f=0.0066 <S\*\*2>=0.000

538 -> 565 0.12782  
538 -> 567 -0.14022  
539 -> 567 0.10091  
551 -> 566 -0.15175  
559 -> 573 -0.20228  
561 -> 574 0.24160  
561 -> 575 -0.10810  
562 -> 578 0.22665  
562 -> 579 0.28246  
564 -> 586 0.10032

Excited State 142: Singlet-A 4.1313 eV 300.11 nm f=0.0054 <S\*\*2>=0.000

|            |          |
|------------|----------|
| 538 -> 565 | 0.10105  |
| 538 -> 567 | -0.10860 |
| 553 -> 570 | 0.39242  |
| 554 -> 572 | 0.31260  |
| 562 -> 576 | 0.12729  |
| 562 -> 577 | -0.26394 |
| 562 -> 581 | 0.14057  |

Excited State 143: Singlet-A 4.1332 eV 299.97 nm f=0.0033 <S\*\*2>=0.000

|            |          |
|------------|----------|
| 538 -> 565 | 0.19865  |
| 538 -> 567 | -0.19237 |
| 539 -> 565 | 0.12288  |
| 539 -> 567 | 0.16185  |
| 540 -> 565 | 0.11010  |
| 549 -> 567 | -0.13453 |
| 550 -> 565 | -0.20459 |
| 550 -> 566 | -0.10871 |
| 550 -> 567 | -0.10599 |
| 551 -> 565 | 0.11003  |
| 551 -> 566 | 0.23847  |
| 551 -> 567 | -0.18190 |
| 561 -> 574 | -0.12050 |
| 562 -> 577 | 0.14143  |

Excited State 144: Singlet-A 4.1370 eV 299.70 nm f=0.0198 <S\*\*2>=0.000

|            |          |
|------------|----------|
| 553 -> 570 | 0.31692  |
| 554 -> 572 | 0.23252  |
| 562 -> 573 | -0.11365 |
| 562 -> 576 | -0.19255 |
| 562 -> 577 | 0.42143  |
| 562 -> 578 | 0.11369  |
| 562 -> 581 | -0.21912 |

Excited State 145: Singlet-A 4.1451 eV 299.11 nm f=0.0007 <S\*\*2>=0.000



539 -> 565 0.14044  
550 -> 565 -0.16571  
550 -> 567 -0.17680  
551 -> 567 0.59543

Excited State 146: Singlet-A 4.1496 eV 298.78 nm f=0.0031 <S\*\*2>=0.000

550 -> 566 0.11223  
559 -> 575 0.12357  
560 -> 574 0.17817  
560 -> 576 0.29822  
560 -> 577 0.11963  
561 -> 573 -0.15016  
561 -> 574 -0.22633  
561 -> 575 -0.10102  
561 -> 576 -0.19116  
562 -> 578 0.10798  
564 -> 591 0.10663  
564 -> 592 0.12574  
564 -> 593 -0.17235

Excited State 147: Singlet-A 4.1527 eV 298.57 nm f=0.0102 <S\*\*2>=0.000

549 -> 566 0.13428  
550 -> 566 -0.24000  
551 -> 566 -0.14484  
559 -> 573 0.13830  
560 -> 575 0.26582  
560 -> 576 0.24634  
560 -> 577 0.10077  
561 -> 575 0.24193  
562 -> 578 0.13079  
562 -> 579 0.10092

Excited State 148: Singlet-A 4.1534 eV 298.51 nm f=0.0002 <S\*\*2>=0.000

549 -> 566 -0.19943  
550 -> 566 0.37312  
551 -> 566 0.19058

551 -> 568 0.13709  
552 -> 568 -0.11533  
560 -> 575 0.22211  
561 -> 576 0.17845  
562 -> 580 0.11210  
564 -> 593 0.11447

Excited State 149: Singlet-A 4.1581 eV 298.17 nm f=0.0380 <S\*\*2>=0.000

550 -> 566 0.11693  
558 -> 574 0.13930  
559 -> 576 -0.20336  
560 -> 575 -0.12673  
561 -> 574 0.29187  
561 -> 575 0.28885  
561 -> 576 -0.21381  
563 -> 586 -0.12589  
563 -> 591 -0.10556  
563 -> 592 -0.11811  
563 -> 593 0.14737

Excited State 150: Singlet-A 4.1611 eV 297.96 nm f=0.0052 <S\*\*2>=0.000

560 -> 574 -0.29559  
560 -> 575 -0.28122  
560 -> 576 0.30126  
560 -> 577 0.12399  
560 -> 579 0.10906  
561 -> 573 0.13652  
561 -> 574 -0.14573  
562 -> 577 -0.11199  
562 -> 580 -0.18873  
563 -> 586 0.10596  
564 -> 593 0.13112

Excited State 151: Singlet-A 4.1748 eV 296.98 nm f=0.0012 <S\*\*2>=0.000

560 -> 574 -0.10127  
560 -> 575 -0.19937

562 -> 580 0.61102

Excited State 152: Singlet-A 4.1801 eV 296.61 nm f=0.0028 <S\*\*2>=0.000

538 -> 567 0.17245

549 -> 567 -0.12449

549 -> 568 -0.14341

550 -> 566 -0.11928

550 -> 567 -0.24349

550 -> 568 0.22743

551 -> 566 -0.10265

551 -> 567 -0.10481

551 -> 568 0.42803

Excited State 153: Singlet-A 4.1822 eV 296.46 nm f=0.0093 <S\*\*2>=0.000

538 -> 567 -0.13144

550 -> 567 0.17914

550 -> 568 0.15924

551 -> 567 0.12652

551 -> 568 0.28595

553 -> 569 0.10454

554 -> 571 0.12057

559 -> 575 0.10164

561 -> 576 -0.28599

562 -> 580 0.12322

563 -> 586 0.13017

564 -> 593 0.13077

Excited State 154: Singlet-A 4.1829 eV 296.41 nm f=0.0027 <S\*\*2>=0.000

538 -> 565 0.10063

538 -> 567 -0.21514

549 -> 567 0.15055

550 -> 567 0.30082

551 -> 567 0.17263

551 -> 568 0.14735

553 -> 569 -0.10628

554 -> 571 -0.14432

561 -> 576 0.24386  
563 -> 586 -0.11662  
564 -> 593 -0.12450

Excited State 155: Singlet-A 4.1856 eV 296.21 nm f=0.0003 <S\*\*2>=0.000

559 -> 577 -0.12734  
561 -> 574 -0.17008  
561 -> 578 0.13407  
563 -> 585 -0.15125  
563 -> 591 -0.21794  
563 -> 592 -0.19156  
563 -> 593 0.28329  
564 -> 585 -0.12817  
564 -> 586 0.22042  
564 -> 588 -0.22263

Excited State 156: Singlet-A 4.1934 eV 295.66 nm f=0.0060 <S\*\*2>=0.000

553 -> 569 0.31230  
554 -> 571 0.44542  
559 -> 574 -0.10351  
561 -> 576 0.10081  
561 -> 577 -0.13284  
563 -> 588 0.14841  
564 -> 589 0.18305  
564 -> 593 -0.10862

Excited State 157: Singlet-A 4.1983 eV 295.32 nm f=0.0187 <S\*\*2>=0.000

553 -> 569 0.18614  
554 -> 571 0.27275  
561 -> 573 -0.10063  
561 -> 575 -0.14249  
561 -> 576 0.11171  
561 -> 577 0.15738  
563 -> 588 -0.19977  
564 -> 585 -0.10237  
564 -> 587 0.15960

|                                                                        |          |
|------------------------------------------------------------------------|----------|
| 564 -> 588                                                             | 0.22715  |
| 564 -> 589                                                             | -0.22735 |
| Excited State 158: Singlet-A 4.2021 eV 295.05 nm f=0.0021 <S**2>=0.000 |          |
| 541 -> 566                                                             | -0.11791 |
| 541 -> 568                                                             | -0.11290 |
| 542 -> 568                                                             | -0.13667 |
| 549 -> 568                                                             | -0.24807 |
| 550 -> 568                                                             | 0.41100  |
| 551 -> 568                                                             | -0.39449 |
| Excited State 159: Singlet-A 4.2045 eV 294.89 nm f=0.0338 <S**2>=0.000 |          |
| 559 -> 578                                                             | 0.10263  |
| 561 -> 575                                                             | -0.25311 |
| 561 -> 578                                                             | -0.18549 |
| 563 -> 588                                                             | 0.11239  |
| 563 -> 589                                                             | 0.24214  |
| 564 -> 586                                                             | 0.14426  |
| 564 -> 587                                                             | 0.11292  |
| 564 -> 588                                                             | 0.18870  |
| 564 -> 589                                                             | 0.32144  |
| Excited State 160: Singlet-A 4.2394 eV 292.45 nm f=0.0008 <S**2>=0.000 |          |
| 559 -> 574                                                             | 0.11325  |
| 560 -> 578                                                             | -0.10429 |
| 562 -> 577                                                             | 0.22181  |
| 562 -> 581                                                             | 0.59582  |
| Excited State 161: Singlet-A 4.2471 eV 291.93 nm f=0.0046 <S**2>=0.000 |          |
| 537 -> 565                                                             | -0.10573 |
| 539 -> 565                                                             | 0.19932  |
| 540 -> 565                                                             | 0.15189  |
| 543 -> 565                                                             | 0.12510  |
| 544 -> 565                                                             | -0.16908 |
| 545 -> 565                                                             | 0.11149  |
| 546 -> 565                                                             | -0.18232 |

548 -> 565 0.17495  
549 -> 565 -0.32745  
550 -> 565 0.34899  
550 -> 567 0.12177

Excited State 162: Singlet-A 4.2485 eV 291.83 nm f=0.0038 <S\*\*2>=0.000

553 -> 570 0.11409  
554 -> 572 -0.15692  
559 -> 573 0.17556  
559 -> 574 0.25707  
560 -> 578 0.23693  
560 -> 579 -0.12758  
561 -> 573 0.10634  
561 -> 577 0.26272  
561 -> 581 0.11748  
563 -> 588 0.12573  
564 -> 588 -0.10527  
564 -> 589 0.16779

Excited State 163: Singlet-A 4.2559 eV 291.33 nm f=0.0015 <S\*\*2>=0.000

553 -> 570 -0.31336  
554 -> 572 0.36675  
560 -> 574 -0.19147  
560 -> 578 0.32616  
560 -> 579 -0.16115  
561 -> 577 -0.10492

Excited State 164: Singlet-A 4.2597 eV 291.06 nm f=0.0097 <S\*\*2>=0.000

553 -> 570 -0.25660  
554 -> 572 0.34029  
559 -> 573 0.25624  
559 -> 574 0.12818  
560 -> 574 0.15505  
560 -> 578 -0.22272  
560 -> 579 0.10910  
561 -> 577 0.13816

562 -> 581 -0.12376

Excited State 165: Singlet-A 4.2631 eV 290.83 nm f=0.0050 <S\*\*2>=0.000

538 -> 567 0.14095

539 -> 565 0.12660

543 -> 565 0.19396

545 -> 565 0.17820

546 -> 565 -0.15369

547 -> 565 0.12780

548 -> 565 0.18192

549 -> 565 0.42674

550 -> 565 -0.17723

550 -> 567 0.12367

Excited State 166: Singlet-A 4.2655 eV 290.67 nm f=0.0014 <S\*\*2>=0.000

554 -> 572 -0.12161

559 -> 573 0.41022

559 -> 574 -0.19745

561 -> 574 0.17007

561 -> 575 -0.16473

561 -> 577 -0.14378

561 -> 578 -0.15658

561 -> 579 -0.10242

564 -> 588 -0.15161

Excited State 167: Singlet-A 4.2734 eV 290.13 nm f=0.0012 <S\*\*2>=0.000

561 -> 578 0.10032

561 -> 579 0.11104

563 -> 592 0.10745

564 -> 587 0.54505

564 -> 588 -0.19858

Excited State 168: Singlet-A 4.2740 eV 290.09 nm f=0.0044 <S\*\*2>=0.000

534 -> 566 -0.21016

535 -> 566 0.10811

541 -> 566 0.26404

542 -> 566 -0.21205  
546 -> 566 0.26236  
548 -> 566 -0.23038  
550 -> 566 -0.25545  
550 -> 568 0.15475

Excited State 169: Singlet-A 4.2831 eV 289.47 nm f=0.1091 <S\*\*2>=0.000

553 -> 571 -0.25940  
559 -> 576 0.13164  
559 -> 577 0.14397  
559 -> 580 0.13461  
560 -> 577 -0.10702  
560 -> 578 -0.10221  
560 -> 579 -0.11183  
561 -> 579 0.35879  
562 -> 582 0.20613  
562 -> 583 -0.13188  
564 -> 586 0.15458

Excited State 170: Singlet-A 4.2837 eV 289.44 nm f=0.0142 <S\*\*2>=0.000

553 -> 571 -0.30262  
558 -> 580 -0.10214  
559 -> 578 0.10550  
560 -> 578 0.23204  
560 -> 579 0.40431  
561 -> 580 0.22576  
564 -> 589 -0.10431

Excited State 171: Singlet-A 4.2847 eV 289.36 nm f=0.0045 <S\*\*2>=0.000

553 -> 571 0.46457  
560 -> 577 -0.21917  
560 -> 579 0.18253  
562 -> 582 0.25126  
562 -> 583 -0.14825

Excited State 172: Singlet-A 4.2883 eV 289.12 nm f=0.0018 <S\*\*2>=0.000



|            |          |
|------------|----------|
| 538 -> 565 | 0.13514  |
| 543 -> 565 | -0.11900 |
| 544 -> 565 | 0.19390  |
| 545 -> 565 | 0.34394  |
| 545 -> 567 | 0.14606  |
| 546 -> 565 | 0.30433  |
| 547 -> 565 | 0.18331  |
| 547 -> 567 | 0.15721  |
| 548 -> 565 | 0.10326  |
| 548 -> 567 | 0.15526  |
| 550 -> 567 | -0.13208 |

Excited State 173: Singlet-A 4.2902 eV 288.99 nm f=0.0762 <S\*\*2>=0.000

|            |          |
|------------|----------|
| 553 -> 571 | -0.24754 |
| 559 -> 576 | -0.12330 |
| 559 -> 577 | -0.12302 |
| 560 -> 577 | -0.14977 |
| 561 -> 579 | -0.26966 |
| 562 -> 582 | 0.34057  |
| 562 -> 583 | -0.19622 |
| 564 -> 586 | -0.10145 |
| 564 -> 587 | 0.14821  |

Excited State 174: Singlet-A 4.2928 eV 288.82 nm f=0.0136 <S\*\*2>=0.000

|            |          |
|------------|----------|
| 553 -> 571 | 0.12098  |
| 559 -> 576 | 0.10135  |
| 559 -> 577 | -0.16368 |
| 560 -> 577 | 0.22181  |
| 561 -> 574 | 0.12893  |
| 561 -> 577 | -0.13712 |
| 561 -> 578 | 0.33487  |
| 562 -> 582 | 0.21495  |
| 562 -> 583 | -0.13082 |
| 564 -> 588 | 0.21735  |

Excited State 175: Singlet-A 4.2980 eV 288.47 nm f=0.0028 <S\*\*2>=0.000

559 -> 574 0.11656  
559 -> 575 -0.31952  
560 -> 578 -0.12743  
560 -> 579 -0.28780  
561 -> 577 -0.14748  
561 -> 580 0.32872

Excited State 176: Singlet-A 4.3024 eV 288.18 nm f=0.0026 <S\*\*2>=0.000

541 -> 568 0.12158  
542 -> 568 0.16731  
543 -> 566 0.10638  
546 -> 566 0.10221  
548 -> 566 -0.10452  
549 -> 566 0.48962  
550 -> 566 0.26502  
550 -> 568 0.14155

Excited State 177: Singlet-A 4.3041 eV 288.06 nm f=0.0056 <S\*\*2>=0.000

538 -> 565 -0.12847  
538 -> 567 0.16358  
543 -> 567 -0.15565  
544 -> 567 0.16073  
546 -> 567 0.22422  
547 -> 565 0.10429  
547 -> 567 -0.11488  
548 -> 567 -0.16910  
550 -> 567 0.16789  
560 -> 576 0.10979  
560 -> 577 -0.20831  
560 -> 581 0.11913  
561 -> 578 0.14205  
562 -> 582 -0.10642

Excited State 178: Singlet-A 4.3061 eV 287.93 nm f=0.0015 <S\*\*2>=0.000

538 -> 567 0.12363  
543 -> 567 -0.11449

|            |          |
|------------|----------|
| 544 -> 567 | 0.11936  |
| 546 -> 567 | 0.16853  |
| 548 -> 567 | -0.12746 |
| 550 -> 567 | 0.14025  |
| 559 -> 573 | -0.13971 |
| 559 -> 577 | 0.11208  |
| 560 -> 576 | -0.14595 |
| 560 -> 577 | 0.28840  |
| 560 -> 581 | -0.16172 |
| 561 -> 577 | 0.11928  |
| 561 -> 578 | -0.19367 |
| 562 -> 582 | 0.13593  |

Excited State 179: Singlet-A 4.3134 eV 287.44 nm f=0.0054 <S\*\*2>=0.000

|            |          |
|------------|----------|
| 536 -> 568 | -0.10687 |
| 542 -> 566 | 0.10125  |
| 548 -> 568 | -0.10978 |
| 549 -> 566 | -0.11599 |
| 550 -> 568 | 0.11557  |
| 559 -> 574 | 0.33026  |
| 559 -> 578 | 0.13573  |
| 559 -> 579 | -0.19731 |
| 561 -> 577 | -0.19394 |
| 561 -> 578 | -0.15165 |
| 561 -> 580 | -0.13658 |
| 561 -> 581 | 0.16691  |

Excited State 180: Singlet-A 4.3147 eV 287.35 nm f=0.0011 <S\*\*2>=0.000

|            |          |
|------------|----------|
| 536 -> 568 | -0.20752 |
| 541 -> 568 | 0.15114  |
| 542 -> 566 | 0.17813  |
| 542 -> 568 | 0.16920  |
| 543 -> 568 | 0.11075  |
| 544 -> 566 | 0.11438  |
| 546 -> 568 | 0.16726  |
| 548 -> 568 | -0.22187 |

549 -> 566 -0.21200  
550 -> 568 0.22616  
559 -> 574 -0.18165  
559 -> 579 0.10002

Excited State 181: Singlet-A 4.3171 eV 287.19 nm f=0.0001 <S\*\*2>=0.000

545 -> 567 0.15915  
547 -> 567 -0.16715  
548 -> 567 -0.14206  
549 -> 567 0.50818  
550 -> 567 -0.27888

Excited State 182: Singlet-A 4.3243 eV 286.72 nm f=0.0037 <S\*\*2>=0.000

559 -> 575 0.32257  
559 -> 578 0.19783  
559 -> 579 0.21545  
560 -> 580 -0.16774  
561 -> 576 0.12913  
561 -> 580 0.19819  
561 -> 583 -0.13017  
562 -> 582 -0.17119  
562 -> 583 -0.24738

Excited State 183: Singlet-A 4.3285 eV 286.43 nm f=0.0012 <S\*\*2>=0.000

559 -> 576 -0.31970  
559 -> 578 0.10886  
560 -> 580 0.44907  
561 -> 578 -0.10570  
562 -> 583 -0.14196

Excited State 184: Singlet-A 4.3345 eV 286.04 nm f=0.0018 <S\*\*2>=0.000

537 -> 565 -0.13212  
543 -> 567 0.20493  
544 -> 567 -0.13106  
545 -> 565 -0.16860  
545 -> 567 0.38876

546 -> 567 -0.17619  
547 -> 565 0.10173  
547 -> 567 -0.27398  
548 -> 567 -0.10176  
549 -> 567 -0.21613

Excited State 185: Singlet-A 4.3367 eV 285.90 nm f=0.0033 <S\*\*2>=0.000

559 -> 575 0.11731  
560 -> 580 0.12123  
563 -> 585 -0.34248  
563 -> 586 0.35124  
563 -> 587 -0.10945  
564 -> 585 -0.28096  
564 -> 586 -0.17409  
564 -> 591 0.11260

Excited State 186: Singlet-A 4.3423 eV 285.53 nm f=0.0046 <S\*\*2>=0.000

537 -> 565 -0.10638  
553 -> 572 0.10630  
559 -> 575 -0.13177  
562 -> 582 -0.13203  
562 -> 583 -0.20449  
563 -> 585 -0.18950  
563 -> 587 0.37231  
564 -> 590 0.15253  
564 -> 591 -0.15409  
564 -> 592 0.15089  
564 -> 594 0.10921

Excited State 187: Singlet-A 4.3443 eV 285.39 nm f=0.0006 <S\*\*2>=0.000

537 -> 565 -0.11296  
553 -> 572 0.12426  
559 -> 575 0.14093  
559 -> 576 0.27114  
559 -> 580 -0.15573  
560 -> 580 0.29848

|            |          |
|------------|----------|
| 561 -> 575 | 0.15947  |
| 561 -> 579 | -0.18434 |
| 562 -> 582 | 0.11488  |
| 562 -> 583 | 0.23401  |
| 562 -> 584 | -0.10801 |
| 563 -> 586 | -0.10264 |

Excited State 188: Singlet-A 4.3456 eV 285.31 nm f=0.0003 <S\*\*2>=0.000

|            |          |
|------------|----------|
| 553 -> 572 | 0.64621  |
| 554 -> 570 | -0.13591 |

Excited State 189: Singlet-A 4.3472 eV 285.21 nm f=0.0030 <S\*\*2>=0.000

|            |          |
|------------|----------|
| 559 -> 576 | -0.18946 |
| 560 -> 580 | -0.15251 |
| 561 -> 580 | 0.11807  |
| 562 -> 582 | 0.24639  |
| 562 -> 583 | 0.39055  |
| 563 -> 587 | 0.24470  |
| 564 -> 591 | -0.10473 |

Excited State 190: Singlet-A 4.3497 eV 285.04 nm f=0.0129 <S\*\*2>=0.000

|            |          |
|------------|----------|
| 535 -> 565 | -0.28207 |
| 536 -> 565 | -0.14540 |
| 537 -> 565 | 0.38351  |
| 537 -> 567 | 0.11427  |
| 538 -> 565 | 0.14102  |
| 539 -> 565 | -0.10300 |
| 540 -> 565 | 0.11486  |
| 560 -> 580 | 0.16118  |
| 563 -> 587 | 0.13590  |

Excited State 191: Singlet-A 4.3526 eV 284.85 nm f=0.0016 <S\*\*2>=0.000

|            |          |
|------------|----------|
| 541 -> 566 | 0.12774  |
| 542 -> 568 | -0.22623 |
| 543 -> 568 | -0.12511 |
| 544 -> 566 | 0.17932  |

|                                                                        |          |
|------------------------------------------------------------------------|----------|
| 548 -> 568                                                             | 0.11013  |
| 549 -> 566                                                             | 0.12821  |
| 549 -> 568                                                             | 0.44161  |
| 550 -> 568                                                             | 0.21875  |
| Excited State 192: Singlet-A 4.3585 eV 284.47 nm f=0.0183 <S**2>=0.000 |          |
| 559 -> 576                                                             | 0.14375  |
| 563 -> 585                                                             | 0.25685  |
| 563 -> 586                                                             | 0.31698  |
| 563 -> 587                                                             | 0.14606  |
| 563 -> 592                                                             | -0.15551 |
| 563 -> 593                                                             | 0.10378  |
| 564 -> 586                                                             | -0.18211 |
| 564 -> 590                                                             | -0.28930 |
| Excited State 193: Singlet-A 4.3602 eV 284.35 nm f=0.0022 <S**2>=0.000 |          |
| 534 -> 566                                                             | -0.14258 |
| 541 -> 566                                                             | 0.17584  |
| 541 -> 568                                                             | -0.12730 |
| 542 -> 566                                                             | 0.21295  |
| 543 -> 566                                                             | 0.14572  |
| 544 -> 566                                                             | 0.33077  |
| 544 -> 568                                                             | -0.15803 |
| 549 -> 566                                                             | 0.14053  |
| 549 -> 568                                                             | -0.32064 |
| 550 -> 568                                                             | -0.13696 |
| Excited State 194: Singlet-A 4.3672 eV 283.90 nm f=0.0044 <S**2>=0.000 |          |
| 557 -> 573                                                             | -0.31122 |
| 562 -> 575                                                             | 0.13883  |
| 562 -> 584                                                             | 0.55700  |
| Excited State 195: Singlet-A 4.3700 eV 283.71 nm f=0.0025 <S**2>=0.000 |          |
| 534 -> 566                                                             | 0.29186  |
| 541 -> 566                                                             | -0.11304 |
| 541 -> 568                                                             | 0.10674  |

542 -> 566 -0.17797  
543 -> 566 0.28741  
543 -> 568 -0.13036  
544 -> 566 0.30836  
544 -> 568 -0.14148  
562 -> 584 -0.12520

Excited State 196: Singlet-A 4.3739 eV 283.46 nm f=0.0018 <S\*\*2>=0.000

557 -> 573 0.48829  
560 -> 580 0.11312  
562 -> 578 0.12653  
562 -> 584 0.31216

Excited State 197: Singlet-A 4.3754 eV 283.36 nm f=0.0024 <S\*\*2>=0.000

559 -> 581 0.11522  
560 -> 581 -0.15471  
561 -> 582 -0.11772  
563 -> 585 0.16268  
563 -> 586 0.11451  
563 -> 593 0.21865  
564 -> 586 -0.15530  
564 -> 588 0.11293  
564 -> 590 0.43848

Excited State 198: Singlet-A 4.3805 eV 283.04 nm f=0.0000 <S\*\*2>=0.000

543 -> 568 0.17127  
544 -> 566 -0.13521  
544 -> 568 -0.10875  
545 -> 568 -0.10268  
546 -> 566 0.14284  
546 -> 568 0.40146  
547 -> 568 -0.32899  
548 -> 568 0.28257  
549 -> 568 -0.10409

Excited State 199: Singlet-A 4.3889 eV 282.49 nm f=0.0125 <S\*\*2>=0.000





|    |          |          |          |   |          |          |          |
|----|----------|----------|----------|---|----------|----------|----------|
| C  | 0.753347 | -5.42082 | 2.52689  | C | 5.972867 | -3.92338 | 0.300919 |
| C  | 0.885903 | -4.47753 | 1.500448 | C | 7.285289 | -4.12063 | 0.090191 |
| C  | -0.20379 | -3.69481 | 1.075824 | C | 8.20734  | -3.00445 | -0.20033 |
| C  | -5.65377 | -3.69254 | 2.972049 | C | 7.616381 | -1.65444 | -0.26242 |
| C  | -6.48546 | -4.50437 | 3.74991  | C | 6.305202 | -1.43542 | -0.05818 |
| C  | -6.50106 | -5.8897  | 3.551965 | O | 9.430346 | -3.19758 | -0.39113 |
| C  | -5.67882 | -6.46251 | 2.573772 | C | 2.70784  | -1.64486 | 2.865197 |
| C  | -4.85159 | -5.65319 | 1.790518 | C | 3.412547 | -1.64436 | 4.075935 |
| N  | -4.00137 | 2.946959 | -0.16512 | C | 4.783746 | -1.92858 | 4.121661 |
| C  | -3.02761 | 2.216077 | 0.491191 | C | 5.485258 | -2.2202  | 2.941743 |
| C  | -3.65346 | 1.545001 | 1.627767 | C | 3.65767  | -3.00433 | -1.68133 |
| C  | -5.02099 | 1.92041  | 1.634309 | C | 2.271775 | -2.86508 | -1.66809 |
| C  | -5.34998 | 2.87072  | 0.455139 | N | 1.873537 | -2.28671 | -0.44094 |
| C  | -5.78684 | 4.220852 | 0.98633  | C | 4.57849  | -3.6249  | -2.65358 |
| C  | -7.03007 | 4.700543 | 0.813554 | C | 1.178637 | -3.30738 | -2.52212 |
| C  | -8.04385 | 3.976381 | 0.021098 | C | 1.331228 | -3.82991 | -3.81791 |
| C  | -7.60692 | 2.724084 | -0.62709 | C | 0.224741 | -4.32827 | -4.50899 |
| C  | -6.3655  | 2.233793 | -0.46841 | C | -1.03565 | -4.31261 | -3.89988 |
| O  | -9.2098  | 4.41254  | -0.11029 | C | -1.19816 | -3.76552 | -2.62028 |
| C  | -3.15858 | 0.71644  | 2.639935 | C | -0.11165 | -3.22122 | -1.91484 |
| C  | -4.03974 | 0.274479 | 3.636962 | C | 5.651825 | -2.90308 | -3.20874 |
| C  | -5.39077 | 0.648528 | 3.635821 | C | 6.540142 | -3.52179 | -4.094   |
| C  | -5.89273 | 1.481418 | 2.622198 | C | 6.364552 | -4.8647  | -4.44635 |
| C  | -3.4189  | 3.737601 | -1.15262 | C | 5.293774 | -5.58899 | -3.90773 |
| C  | -2.06144 | 3.450498 | -1.07863 | C | 4.410166 | -4.97731 | -3.01495 |
| N  | -1.83325 | 2.494998 | -0.05882 | N | 4.563354 | 1.764254 | 0.840705 |
| C  | -4.18596 | 4.679142 | -1.99541 | C | 3.514047 | 1.671762 | -0.07168 |
| C  | -0.87801 | 3.993222 | -1.71747 | C | 3.834066 | 1.430083 | -1.45388 |
| C  | -0.8969  | 4.912293 | -2.78148 | C | 2.938454 | 0.777933 | -2.33135 |
| C  | 0.297138 | 5.452446 | -3.25996 | C | 3.340139 | 0.362647 | -3.58919 |
| C  | 1.51028  | 5.080454 | -2.66728 | C | 4.665149 | 0.586588 | -4.02625 |
| C  | 1.530739 | 4.148548 | -1.62348 | C | 5.554088 | 1.264065 | -3.21046 |
| C  | 0.350098 | 3.5598   | -1.14205 | C | 4.051867 | 2.234765 | 1.990602 |
| C  | -5.06547 | 4.207908 | -2.98796 | C | 2.62114  | 2.383985 | 1.822468 |
| C  | -5.80018 | 5.106876 | -3.76753 | N | 2.299158 | 1.953665 | 0.541675 |
| C  | -5.66044 | 6.485595 | -3.57183 | C | 4.940065 | 2.517135 | 3.131332 |
| C  | -4.7797  | 6.964553 | -2.59418 | C | 1.561981 | 2.951025 | 2.597745 |
| C  | -4.04893 | 6.06877  | -1.80906 | C | 1.666899 | 3.391853 | 3.940089 |
| Cl | -0.23367 | 0.150683 | -1.64771 | C | 0.616779 | 4.078696 | 4.530635 |
| Cl | -0.07315 | -0.1901  | 1.645214 | C | -0.54994 | 4.349404 | 3.786322 |
| Ir | 0.199534 | 2.054527 | 0.196971 | C | -0.69014 | 3.872563 | 2.484024 |
| N  | 4.078316 | -2.50568 | -0.44468 | C | 0.329979 | 3.114322 | 1.87092  |
| C  | 2.980302 | -2.11671 | 0.300106 | C | 5.936577 | 1.584482 | 3.479209 |
| C  | 3.402731 | -1.93055 | 1.685458 | C | 6.840813 | 1.85919  | 4.507153 |
| C  | 4.78661  | -2.22455 | 1.741956 | C | 6.778288 | 3.076663 | 5.196405 |
| C  | 5.350333 | -2.54587 | 0.335962 | C | 5.808487 | 4.021714 | 4.842845 |

|   |          |          |          |   |          |          |          |
|---|----------|----------|----------|---|----------|----------|----------|
| C | 4.898194 | 3.747094 | 3.818223 | H | 1.652437 | -1.41957 | 2.838757 |
| H | -6.32787 | -0.72929 | 0.93335  | H | 2.879501 | -1.42341 | 4.994401 |
| H | -8.70756 | -1.39037 | 1.214485 | H | 5.30645  | -1.92764 | 5.072184 |
| H | -8.05436 | -4.90717 | -1.25803 | H | 6.544715 | -2.45365 | 2.968327 |
| H | -5.67434 | -4.26187 | -1.57455 | H | 2.30956  | -3.8518  | -4.28458 |
| H | -2.31052 | -0.28741 | -2.69191 | H | 0.346769 | -4.73134 | -5.50944 |
| H | -3.75358 | 0.636971 | -4.48439 | H | -1.89649 | -4.71788 | -4.42495 |
| H | -6.20676 | 0.246793 | -4.47154 | H | -2.18709 | -3.75203 | -2.17728 |
| H | -7.24755 | -1.10958 | -2.65113 | H | 5.78326  | -1.85876 | -2.95161 |
| H | -2.55518 | -5.05445 | 3.198656 | H | 7.366804 | -2.95471 | -4.50987 |
| H | -0.57763 | -6.32823 | 3.971163 | H | 7.055113 | -5.34258 | -5.13369 |
| H | 1.618504 | -6.00041 | 2.837295 | H | 5.151919 | -6.6312  | -4.17521 |
| H | 1.854959 | -4.35273 | 1.035008 | H | 3.585361 | -5.54124 | -2.5922  |
| H | -5.62912 | -2.62051 | 3.136676 | H | 1.940913 | 0.548621 | -1.99269 |
| H | -7.11608 | -4.05732 | 4.511643 | H | 2.635756 | -0.16383 | -4.22376 |
| H | -7.14651 | -6.51842 | 4.156668 | H | 4.976736 | 0.255418 | -5.01143 |
| H | -5.68466 | -7.5365  | 2.418609 | H | 6.542883 | 1.507743 | -3.58245 |
| H | -4.21151 | -6.09579 | 1.034374 | H | 2.563457 | 3.184048 | 4.509141 |
| H | -5.04183 | 4.760274 | 1.563791 | H | 0.695513 | 4.412941 | 5.559853 |
| H | -7.3401  | 5.649577 | 1.237064 | H | -1.35545 | 4.919681 | 4.240621 |
| H | -8.33753 | 2.231135 | -1.25935 | H | -1.60785 | 4.071426 | 1.944856 |
| H | -6.04194 | 1.326758 | -0.96868 | H | 5.989097 | 0.648363 | 2.93727  |
| H | -2.12089 | 0.41288  | 2.641667 | H | 7.598289 | 1.126365 | 4.767162 |
| H | -3.65939 | -0.36483 | 4.426532 | H | 7.485435 | 3.291727 | 5.991085 |
| H | -6.0507  | 0.305942 | 4.42607  | H | 5.770052 | 4.97922  | 5.352376 |
| H | -6.93337 | 1.789856 | 2.621707 | H | 4.174606 | 4.500509 | 3.527689 |
| H | -1.83771 | 5.206048 | -3.23204 | C | 5.153828 | 1.772708 | -1.941   |
| H | 0.281526 | 6.161074 | -4.08182 | C | 6.033238 | 2.71129  | -1.27677 |
| H | 2.442667 | 5.510233 | -3.02232 | C | 7.462491 | 2.5441   | -1.35873 |
| H | 2.479838 | 3.864618 | -1.1928  | C | 5.543588 | 3.921068 | -0.66283 |
| H | -5.16083 | 3.139772 | -3.15173 | C | 8.323215 | 3.454189 | -0.81532 |
| H | -6.47611 | 4.732127 | -4.52931 | H | 7.851339 | 1.638741 | -1.81348 |
| H | -6.23081 | 7.181602 | -4.17825 | C | 6.3899   | 4.863791 | -0.15656 |
| H | -4.66495 | 8.032671 | -2.44107 | H | 4.475463 | 4.09831  | -0.65162 |
| H | -3.36415 | 6.438371 | -1.05276 | H | 9.397056 | 3.302986 | -0.82841 |
| H | 5.297214 | -4.75038 | 0.498014 | H | 6.018846 | 5.789849 | 0.267493 |
| H | 7.722793 | -5.11289 | 0.103665 | C | 7.836991 | 4.681008 | -0.18006 |
| H | 8.299915 | -0.84143 | -0.48308 | O | 8.637209 | 5.538298 | 0.299855 |
| H | 5.879058 | -0.43625 | -0.0792  |   |          |          |          |

Excited State 1: 3.000-A -0.5851 eV -2118.90 nm f=-0.0000 <S\*\*2>=2.000

433A -> 437A -0.28770

434A -> 437A 0.15211

435A -> 437A 0.60982  
433B -> 437B 0.28770  
434B -> 437B -0.15211  
435B -> 437B -0.60982

This state for optimization and/or second-order correction.

Total Energy, E(TD-HF/TD-DFT) = -6024.03416658

Copying the excited state density for this state as the 1-particle RhoCI density.

Excited State 2: 3.000-A 0.4485 eV 2764.12 nm f=0.0000 <S\*\*2>=2.000

433A -> 437A -0.13553  
436A -> 437A -0.69153  
433B -> 437B 0.13553  
436B -> 437B 0.69154

Excited State 3: 1.000-A 0.4728 eV 2622.13 nm f=0.0032 <S\*\*2>=0.000

436A -> 437A 0.70264  
436B -> 437B 0.70263

Excited State 4: 3.000-A 0.6698 eV 1850.94 nm f=0.0000 <S\*\*2>=2.000

428A -> 437A -0.13673  
432A -> 437A 0.11685  
433A -> 437A 0.52800  
434A -> 437A -0.22210  
435A -> 437A 0.35711  
436A -> 437A -0.10531  
428B -> 437B 0.13673  
432B -> 437B -0.11685  
433B -> 437B -0.52800  
434B -> 437B 0.22210  
435B -> 437B -0.35710  
436B -> 437B 0.10531

Excited State 5: 1.000-A 0.8450 eV 1467.27 nm f=0.0711 <S\*\*2>=0.000

433A -> 437A 0.30898  
434A -> 437A -0.22835  
435A -> 437A 0.60545

433B -> 437B 0.30899  
434B -> 437B -0.22835  
435B -> 437B 0.60545  
435A <- 437A -0.15327  
435B <- 437B -0.15327

Excited State 6: 3.000-A 0.9738 eV 1273.19 nm f=0.0000 <S\*\*2>=2.000

428A -> 437A -0.12783  
429A -> 437A -0.31715  
432A -> 437A 0.37937  
434A -> 437A 0.46622  
428B -> 437B 0.12782  
429B -> 437B 0.31715  
432B -> 437B -0.37937  
434B -> 437B -0.46622

Excited State 7: 1.000-A 1.0328 eV 1200.48 nm f=0.0069 <S\*\*2>=0.000

429A -> 437A -0.12773  
432A -> 437A 0.26917  
433A -> 437A 0.19772  
434A -> 437A 0.59582  
435A -> 437A 0.13094  
429B -> 437B -0.12773  
432B -> 437B 0.26917  
433B -> 437B 0.19772  
434B -> 437B 0.59583  
435B -> 437B 0.13094

Excited State 8: 3.000-A 1.0849 eV 1142.78 nm f=0.0000 <S\*\*2>=2.000

429A -> 437A 0.26015  
431A -> 437A -0.16278  
432A -> 437A -0.32439  
433A -> 437A 0.28875  
434A -> 437A 0.44690  
429B -> 437B -0.26014  
431B -> 437B 0.16278

432B -> 437B 0.32438  
433B -> 437B -0.28873  
434B -> 437B -0.44689

Excited State 9: 1.000-A 1.1087 eV 1118.25 nm f=0.0104 <S\*\*2>=0.000

429A -> 437A -0.22678  
431A -> 437A 0.14432  
432A -> 437A 0.44762  
433A -> 437A -0.41934  
434A -> 437A -0.14591  
435A -> 437A 0.16315  
429B -> 437B -0.22679  
431B -> 437B 0.14432  
432B -> 437B 0.44764  
433B -> 437B -0.41934  
434B -> 437B -0.14592  
435B -> 437B 0.16315

Excited State 10: 3.000-A 1.1625 eV 1066.50 nm f=0.0000 <S\*\*2>=2.000

424A -> 437A 0.69278  
424B -> 437B -0.69277

Excited State 11: 3.000-A 1.2688 eV 977.21 nm f=0.0000 <S\*\*2>=2.000

428A -> 437A 0.12335  
429A -> 437A 0.44209  
430A -> 437A -0.18854  
431A -> 437A -0.13231  
432A -> 437A 0.46017  
428B -> 437B -0.12335  
429B -> 437B -0.44209  
430B -> 437B 0.18853  
431B -> 437B 0.13231  
432B -> 437B -0.46017

Excited State 12: 1.000-A 1.3018 eV 952.41 nm f=0.0305 <S\*\*2>=0.000

428A -> 437A 0.15113

|              |          |
|--------------|----------|
| 429A -> 437A | 0.38884  |
| 430A -> 437A | -0.10784 |
| 431A -> 437A | -0.15464 |
| 432A -> 437A | 0.45677  |
| 433A -> 437A | 0.16909  |
| 434A -> 437A | -0.13090 |
| 435A -> 437A | -0.20747 |
| 428B -> 437B | 0.15113  |
| 429B -> 437B | 0.38885  |
| 430B -> 437B | -0.10784 |
| 431B -> 437B | -0.15464 |
| 432B -> 437B | 0.45677  |
| 433B -> 437B | 0.16909  |
| 434B -> 437B | -0.13090 |
| 435B -> 437B | -0.20747 |
| 435A <- 437A | 0.10312  |
| 435B <- 437B | 0.10312  |

Excited State 13: 3.000-A 1.3526 eV 916.65 nm f=0.0000 <S\*\*2>=2.000

|              |          |
|--------------|----------|
| 426A -> 437A | 0.16880  |
| 428A -> 437A | 0.20535  |
| 429A -> 437A | 0.18544  |
| 430A -> 437A | 0.58202  |
| 431A -> 437A | 0.17433  |
| 432A -> 437A | 0.10086  |
| 426B -> 437B | -0.16879 |
| 428B -> 437B | -0.20534 |
| 429B -> 437B | -0.18545 |
| 430B -> 437B | -0.58195 |
| 431B -> 437B | -0.17430 |
| 432B -> 437B | -0.10085 |

Excited State 14: 1.000-A 1.3596 eV 911.89 nm f=0.0284 <S\*\*2>=0.000

|              |         |
|--------------|---------|
| 426A -> 437A | 0.11501 |
| 430A -> 437A | 0.55352 |
| 431A -> 437A | 0.23036 |

433A -> 437A 0.25425  
434A -> 437A -0.11933  
435A -> 437A -0.16360  
426B -> 437B 0.11503  
430B -> 437B 0.55359  
431B -> 437B 0.23039  
433B -> 437B 0.25426  
434B -> 437B -0.11933  
435B -> 437B -0.16360

Excited State 15: 1.000-A 1.4024 eV 884.11 nm f=0.0323 <S\*\*2>=0.000

428A -> 437A -0.10951  
429A -> 437A 0.50923  
430A -> 437A 0.14510  
431A -> 437A 0.30738  
433A -> 437A -0.21902  
434A -> 437A 0.17597  
435A -> 437A 0.16650  
428B -> 437B -0.10920  
429B -> 437B 0.50902  
430B -> 437B 0.14515  
431B -> 437B 0.30706  
433B -> 437B -0.21895  
434B -> 437B 0.17591  
435B -> 437B 0.16651

Excited State 16: 3.000-A 1.4028 eV 883.81 nm f=0.0000 <S\*\*2>=2.000

428A -> 437A 0.41918  
429A -> 437A -0.28512  
431A -> 437A -0.44888  
428B -> 437B -0.41926  
429B -> 437B 0.28549  
431B -> 437B 0.44910

Excited State 17: 1.000-A 1.4521 eV 853.83 nm f=0.0262 <S\*\*2>=0.000

430A -> 437A -0.37358



431A -> 437A 0.54054  
433A -> 437A 0.18596  
435A -> 437A -0.14628  
430B -> 437B -0.37359  
431B -> 437B 0.54055  
433B -> 437B 0.18596  
435B -> 437B -0.14628

Excited State 18: 3.000-A 1.4646 eV 846.53 nm f=0.0000 <S\*\*2>=2.000

428A -> 437A 0.45007  
430A -> 437A -0.25953  
431A -> 437A 0.45663  
428B -> 437B -0.45006  
430B -> 437B 0.25952  
431B -> 437B -0.45661

Excited State 19: 1.000-A 1.5103 eV 820.94 nm f=0.0125 <S\*\*2>=0.000

424A -> 437A -0.28218  
428A -> 437A 0.61976  
424B -> 437B -0.28219  
428B -> 437B 0.61977

Excited State 20: 1.000-A 1.5440 eV 802.99 nm f=0.0182 <S\*\*2>=0.000

424A -> 437A 0.62998  
428A -> 437A 0.25170  
433A -> 437A -0.11272  
435A -> 437A 0.11246  
424B -> 437B 0.62999  
428B -> 437B 0.25170  
433B -> 437B -0.11272  
435B -> 437B 0.11246

Excited State 21: 3.000-A 1.5804 eV 784.49 nm f=0.0000 <S\*\*2>=2.000

426A -> 437A 0.59363  
427A -> 437A 0.28902  
430A -> 437A -0.20809

426B -> 437B -0.59361  
427B -> 437B -0.28900  
430B -> 437B 0.20808

Excited State 22: 1.000-A 1.6296 eV 760.82 nm f=0.0012 <S\*\*2>=0.000

426A -> 437A 0.60725  
427A -> 437A 0.31093  
430A -> 437A -0.13048  
426B -> 437B 0.60727  
427B -> 437B 0.31094  
430B -> 437B -0.13049

Excited State 23: 3.000-A 1.8085 eV 685.57 nm f=0.0000 <S\*\*2>=2.000

436A -> 438A -0.54613  
436A -> 439A 0.44039  
436B -> 438B 0.54620  
436B -> 439B -0.44044

Excited State 24: 1.000-A 1.8117 eV 684.34 nm f=0.0000 <S\*\*2>=0.000

436A -> 438A 0.55737  
436A -> 439A -0.42788  
436B -> 438B 0.55730  
436B -> 439B -0.42782

Excited State 25: 3.000-A 1.8154 eV 682.95 nm f=0.0000 <S\*\*2>=2.000

425A -> 437A -0.41439  
426A -> 437A -0.24600  
427A -> 437A 0.50213  
425B -> 437B 0.41439  
426B -> 437B 0.24599  
427B -> 437B -0.50212

Excited State 26: 1.000-A 1.8576 eV 667.43 nm f=0.0017 <S\*\*2>=0.000

425A -> 437A -0.12606  
426A -> 437A -0.32071  
427A -> 437A 0.61463

425B -> 437B -0.12607  
426B -> 437B -0.32071  
427B -> 437B 0.61464

Excited State 27: 3.000-A 1.8701 eV 663.00 nm f=0.0000 <S\*\*2>=2.000

436A -> 438A -0.44155  
436A -> 439A -0.54282  
436B -> 438B 0.44158  
436B -> 439B 0.54285

Excited State 28: 1.000-A 1.8715 eV 662.50 nm f=0.0001 <S\*\*2>=0.000

436A -> 438A 0.42868  
436A -> 439A 0.55437  
436B -> 438B 0.42866  
436B -> 439B 0.55433

Excited State 29: 3.000-A 1.8865 eV 657.21 nm f=0.0000 <S\*\*2>=2.000

404A -> 437A 0.11793  
406A -> 437A 0.11593  
409A -> 437A 0.12582  
413A -> 437A -0.12173  
419A -> 437A -0.19381  
421A -> 437A 0.14074  
422A -> 437A 0.36894  
425A -> 437A 0.32491  
426A -> 437A -0.13017  
427A -> 437A 0.22404  
404B -> 437B -0.11793  
406B -> 437B -0.11593  
409B -> 437B -0.12582  
413B -> 437B 0.12173  
419B -> 437B 0.19380  
421B -> 437B -0.14074  
422B -> 437B -0.36894  
425B -> 437B -0.32490  
426B -> 437B 0.13017

427B -> 437B -0.22404

Excited State 30: 3.000-A 1.9416 eV 638.57 nm f=0.0000 <S\*\*2>=2.000

419A -> 437A 0.16419

422A -> 437A -0.24213

425A -> 437A 0.45073

426A -> 437A -0.14126

427A -> 437A 0.30593

419B -> 437B -0.16419

422B -> 437B 0.24213

425B -> 437B -0.45073

426B -> 437B 0.14126

427B -> 437B -0.30593

Excited State 31: 3.000-A 1.9908 eV 622.77 nm f=0.0000 <S\*\*2>=2.000

433A -> 438A 0.12267

435A -> 438A 0.67481

435A -> 439A 0.12779

433B -> 438B -0.12256

435B -> 438B -0.67417

435B -> 439B -0.12767

Excited State 32: 1.000-A 1.9947 eV 621.58 nm f=0.0000 <S\*\*2>=0.000

433A -> 438A 0.11752

435A -> 438A 0.67705

435A -> 439A 0.12557

433B -> 438B 0.11764

435B -> 438B 0.67769

435B -> 439B 0.12570

Excited State 33: 1.000-A 2.0049 eV 618.39 nm f=0.0121 <S\*\*2>=0.000

425A -> 437A 0.68956

427A -> 437A 0.11878

425B -> 437B 0.68957

427B -> 437B 0.11878

Excited State 34: 3.000-A 2.0539 eV 603.65 nm f=0.0000 <S\*\*2>=2.000

436A -> 440A 0.69596

436B -> 440B -0.69593

Excited State 35: 1.000-A 2.0610 eV 601.57 nm f=0.0001 <S\*\*2>=0.000

436A -> 440A 0.69889

436B -> 440B 0.69891

Excited State 36: 3.000-A 2.1028 eV 589.60 nm f=0.0000 <S\*\*2>=2.000

407A -> 437A -0.22139

408A -> 437A 0.14973

409A -> 437A 0.20705

410A -> 437A -0.16314

415A -> 437A 0.14890

416A -> 437A 0.17705

418A -> 437A -0.11643

419A -> 437A 0.36219

420A -> 437A 0.16297

422A -> 437A 0.23098

407B -> 437B 0.22140

408B -> 437B -0.14972

409B -> 437B -0.20705

410B -> 437B 0.16314

415B -> 437B -0.14890

416B -> 437B -0.17705

418B -> 437B 0.11645

419B -> 437B -0.36219

420B -> 437B -0.16297

422B -> 437B -0.23098

Excited State 37: 3.000-A 2.1403 eV 579.29 nm f=0.0000 <S\*\*2>=2.000

435A -> 438A -0.13545

435A -> 439A 0.69135

435B -> 438B 0.13432

435B -> 439B -0.68543

Excited State 38: 1.000-A 2.1407 eV 579.17 nm f=0.0000 <S\*\*2>=0.000

435A -> 438A -0.13124

435A -> 439A 0.68643

435B -> 438B -0.13239

435B -> 439B 0.69234

Excited State 39: 3.000-A 2.1827 eV 568.04 nm f=0.0000 <S\*\*2>=2.000

407A -> 437A -0.10627

409A -> 437A 0.20208

416A -> 437A -0.11222

420A -> 437A 0.15261

422A -> 437A -0.26880

423A -> 437A 0.52486

407B -> 437B 0.10628

409B -> 437B -0.20208

416B -> 437B 0.11222

420B -> 437B -0.15261

422B -> 437B 0.26879

423B -> 437B -0.52485

Excited State 40: 3.000-A 2.2084 eV 561.43 nm f=0.0000 <S\*\*2>=2.000

404A -> 437A -0.10293

406A -> 437A -0.11461

409A -> 437A -0.20095

413A -> 437A 0.11763

416A -> 437A 0.11944

420A -> 437A -0.19962

422A -> 437A 0.28950

423A -> 437A 0.46197

404B -> 437B 0.10294

406B -> 437B 0.11461

409B -> 437B 0.20095

413B -> 437B -0.11763

416B -> 437B -0.11944

420B -> 437B 0.19962

422B -> 437B -0.28949

423B -> 437B -0.46194

Excited State 41: 1.000-A 2.2190 eV 558.74 nm f=0.0054 <S\*\*2>=0.000

422A -> 437A -0.15344

423A -> 437A 0.68397

422B -> 437B -0.15343

423B -> 437B 0.68400

Excited State 42: 1.000-A 2.2225 eV 557.86 nm f=0.0306 <S\*\*2>=0.000

421A -> 437A 0.12952

422A -> 437A 0.66042

423A -> 437A 0.15554

421B -> 437B 0.12952

422B -> 437B 0.66043

423B -> 437B 0.15555

Excited State 43: 3.000-A 2.2749 eV 545.01 nm f=0.0000 <S\*\*2>=2.000

435A -> 440A 0.69699

435B -> 440B -0.69507

Excited State 44: 1.000-A 2.2763 eV 544.68 nm f=0.0002 <S\*\*2>=0.000

435A -> 440A 0.69668

435B -> 440B 0.69859

Excited State 45: 3.000-A 2.3000 eV 539.06 nm f=0.0000 <S\*\*2>=2.000

397A -> 437A 0.20928

407A -> 437A -0.19143

408A -> 437A 0.12943

409A -> 437A 0.19250

410A -> 437A -0.24837

418A -> 437A 0.13256

419A -> 437A -0.23640

420A -> 437A -0.40216

421A -> 437A 0.12429

397B -> 437B -0.20928

407B -> 437B 0.19144

408B -> 437B -0.12942  
409B -> 437B -0.19250  
410B -> 437B 0.24837  
418B -> 437B -0.13257  
419B -> 437B 0.23639  
420B -> 437B 0.40217  
421B -> 437B -0.12429

Excited State 46: 3.000-A 2.3147 eV 535.63 nm f=0.0000 <S\*\*2>=2.000

402A -> 437A -0.11763  
403A -> 437A 0.14386  
404A -> 437A 0.18064  
405A -> 437A -0.10038  
406A -> 437A 0.18220  
410A -> 437A 0.21873  
416A -> 437A 0.10676  
418A -> 437A -0.18341  
419A -> 437A 0.19580  
420A -> 437A -0.41852  
422A -> 437A -0.15278  
402B -> 437B 0.11763  
403B -> 437B -0.14386  
404B -> 437B -0.18064  
405B -> 437B 0.10038  
406B -> 437B -0.18219  
410B -> 437B -0.21873  
416B -> 437B -0.10676  
418B -> 437B 0.18342  
419B -> 437B -0.19579  
420B -> 437B 0.41853  
422B -> 437B 0.15278

Excited State 47: 1.000-A 2.3264 eV 532.94 nm f=0.0049 <S\*\*2>=0.000

419A -> 437A 0.10604  
420A -> 437A 0.66631  
421A -> 437A -0.12104



419B -> 437B 0.10605  
420B -> 437B 0.66630  
421B -> 437B -0.12104

Excited State 48: 3.000-A 2.3924 eV 518.25 nm f=0.0000 <S\*\*2>=2.000

397A -> 437A -0.25319  
417A -> 437A 0.14971  
420A -> 437A 0.10119  
421A -> 437A 0.55662  
422A -> 437A -0.21503  
397B -> 437B 0.25319  
417B -> 437B -0.14970  
420B -> 437B -0.10118  
421B -> 437B -0.55662  
422B -> 437B 0.21503

Excited State 49: 3.000-A 2.3993 eV 516.75 nm f=0.0000 <S\*\*2>=2.000

428A -> 438A 0.12571  
433A -> 438A 0.39308  
433A -> 439A 0.15898  
434A -> 438A -0.50172  
434A -> 439A 0.10328  
435A -> 438A -0.11671  
428B -> 438B -0.12571  
433B -> 438B -0.39307  
433B -> 439B -0.15898  
434B -> 438B 0.50172  
434B -> 439B -0.10328  
435B -> 438B 0.11671

Excited State 50: 1.000-A 2.4067 eV 515.16 nm f=0.0003 <S\*\*2>=0.000

428A -> 438A -0.11291  
433A -> 438A -0.38063  
433A -> 439A -0.15660  
434A -> 438A 0.52327  
434A -> 439A -0.10905

435A -> 438A 0.10740  
428B -> 438B -0.11291  
433B -> 438B -0.38061  
433B -> 439B -0.15660  
434B -> 438B 0.52329  
434B -> 439B -0.10908  
435B -> 438B 0.10739

Excited State 51: 3.000-A 2.4127 eV 513.88 nm f=0.0000 <S\*\*2>=2.000

431A -> 439A 0.15003  
433A -> 438A -0.44299  
434A -> 438A -0.23802  
434A -> 439A 0.40660  
431B -> 439B -0.15004  
433B -> 438B 0.44304  
434B -> 438B 0.23801  
434B -> 439B -0.40662

Excited State 52: 1.000-A 2.4141 eV 513.58 nm f=0.0060 <S\*\*2>=0.000

417A -> 437A 0.13042  
420A -> 437A 0.10207  
421A -> 437A 0.64787  
422A -> 437A -0.14583  
417B -> 437B 0.13042  
420B -> 437B 0.10207  
421B -> 437B 0.64787  
422B -> 437B -0.14584

Excited State 53: 1.000-A 2.4210 eV 512.12 nm f=0.0002 <S\*\*2>=0.000

431A -> 439A -0.13586  
433A -> 438A 0.46858  
434A -> 438A 0.24086  
434A -> 439A -0.40602  
431B -> 439B -0.13585  
433B -> 438B 0.46856  
434B -> 438B 0.24083

434B -> 439B -0.40599

Excited State 54: 3.000-A 2.4450 eV 507.09 nm f=0.0000 <S\*\*2>=2.000

431A -> 442A 0.12660

434A -> 439A -0.13896

434A -> 442A 0.14896

436A -> 441A 0.29043

436A -> 442A -0.53834

431B -> 442B -0.12660

434B -> 439B 0.13895

434B -> 442B -0.14896

436B -> 441B -0.29043

436B -> 442B 0.53835

Excited State 55: 3.000-A 2.4645 eV 503.08 nm f=0.0000 <S\*\*2>=2.000

396A -> 437A 0.12961

397A -> 437A -0.48024

407A -> 437A -0.10968

409A -> 437A 0.13718

415A -> 437A 0.10579

418A -> 437A -0.24627

420A -> 437A -0.19971

421A -> 437A -0.20259

396B -> 437B -0.12961

397B -> 437B 0.48025

407B -> 437B 0.10969

409B -> 437B -0.13720

415B -> 437B -0.10578

418B -> 437B 0.24633

420B -> 437B 0.19973

421B -> 437B 0.20258

Excited State 56: 1.000-A 2.4654 eV 502.89 nm f=0.0280 <S\*\*2>=0.000

409A -> 437A 0.10465

418A -> 437A -0.34606

419A -> 437A 0.53358

420A -> 437A -0.10564  
409B -> 437B 0.10463  
418B -> 437B -0.34605  
419B -> 437B 0.53357  
420B -> 437B -0.10561

Excited State 57: 3.000-A 2.4755 eV 500.84 nm f=0.0000 <S\*\*2>=2.000

431A -> 439A -0.13488  
432A -> 438A -0.19907  
433A -> 438A -0.25835  
433A -> 439A -0.19975  
434A -> 438A -0.38760  
434A -> 439A -0.40102  
431B -> 439B 0.13490  
432B -> 438B 0.19909  
433B -> 438B 0.25839  
433B -> 439B 0.19979  
434B -> 438B 0.38766  
434B -> 439B 0.40110

Excited State 58: 1.000-A 2.4782 eV 500.30 nm f=0.0001 <S\*\*2>=0.000

431A -> 439A 0.12952  
432A -> 438A 0.17523  
433A -> 438A 0.25985  
433A -> 439A 0.20286  
434A -> 438A 0.36583  
434A -> 439A 0.45259  
431B -> 439B 0.12949  
432B -> 438B 0.17520  
433B -> 438B 0.25981  
433B -> 439B 0.20282  
434B -> 438B 0.36577  
434B -> 439B 0.45252

Excited State 59: 3.000-A 2.4830 eV 499.32 nm f=0.0000 <S\*\*2>=2.000

407A -> 438A -0.25531

408A -> 438A -0.56111  
408A -> 439A -0.20287  
411A -> 438A -0.10336  
407B -> 438B 0.25527  
408B -> 438B 0.56113  
408B -> 439B 0.20288  
411B -> 438B 0.10337

Excited State 60: 3.000-A 2.4878 eV 498.37 nm f=0.0000 <S\*\*2>=2.000

408A -> 439A 0.12154  
410A -> 439A -0.19620  
411A -> 438A 0.23557  
411A -> 439A -0.57027  
408B -> 439B -0.12155  
410B -> 439B 0.19619  
411B -> 438B -0.23557  
411B -> 439B 0.57027

Excited State 61: 3.000-A 2.5001 eV 495.92 nm f=0.0000 <S\*\*2>=2.000

418A -> 437A 0.11138  
418A -> 440A 0.57284  
419A -> 440A 0.30295  
420A -> 440A -0.11645  
418B -> 437B -0.11138  
418B -> 440B -0.57283  
419B -> 440B -0.30298  
420B -> 440B 0.11645

Excited State 62: 3.000-A 2.5274 eV 490.56 nm f=0.0000 <S\*\*2>=2.000

411A -> 439A 0.12243  
431A -> 439A 0.12526  
432A -> 438A 0.34055  
432A -> 439A -0.37436  
433A -> 438A -0.11570  
433A -> 439A 0.29884  
434A -> 439A -0.27439

411B -> 439B -0.12243  
431B -> 439B -0.12526  
432B -> 438B -0.34056  
432B -> 439B 0.37436  
433B -> 438B 0.11570  
433B -> 439B -0.29885  
434B -> 439B 0.27439

Excited State 63: 1.000-A 2.5372 eV 488.66 nm f=0.0008 <S\*\*2>=0.000

431A -> 439A 0.11372  
432A -> 438A 0.36783  
432A -> 439A -0.35334  
433A -> 438A -0.11478  
433A -> 439A 0.34167  
434A -> 439A -0.24526  
431B -> 439B 0.11372  
432B -> 438B 0.36783  
432B -> 439B -0.35333  
433B -> 438B -0.11477  
433B -> 439B 0.34167  
434B -> 439B -0.24526

Excited State 64: 1.000-A 2.5382 eV 488.48 nm f=0.0023 <S\*\*2>=0.000

402A -> 437A 0.13120  
403A -> 437A -0.10976  
407A -> 437A 0.20974  
408A -> 437A -0.15563  
409A -> 437A -0.28393  
413A -> 437A 0.13494  
418A -> 437A 0.34137  
419A -> 437A 0.31946  
402B -> 437B 0.13120  
403B -> 437B -0.10976  
407B -> 437B 0.20975  
408B -> 437B -0.15562  
409B -> 437B -0.28393

413B -> 437B 0.13494  
418B -> 437B 0.34136  
419B -> 437B 0.31948

Excited State 65: 3.000-A 2.5557 eV 485.13 nm f=0.0000 <S\*\*2>=2.000

402A -> 437A -0.15683  
403A -> 437A 0.11833  
415A -> 437A 0.27349  
416A -> 437A 0.23146  
417A -> 437A 0.35585  
418A -> 437A 0.25723  
419A -> 437A -0.19415  
421A -> 437A -0.23160  
402B -> 437B 0.15684  
403B -> 437B -0.11833  
415B -> 437B -0.27349  
416B -> 437B -0.23146  
417B -> 437B -0.35585  
418B -> 437B -0.25724  
419B -> 437B 0.19413  
421B -> 437B 0.23160

Excited State 66: 3.000-A 2.5727 eV 481.92 nm f=0.0000 <S\*\*2>=2.000

428A -> 441A 0.14348  
432A -> 438A 0.21448  
433A -> 439A -0.25269  
433A -> 441A 0.21379  
434A -> 441A -0.11065  
435A -> 441A 0.36676  
435A -> 442A 0.11564  
436A -> 441A 0.24141  
436A -> 442A 0.13076  
428B -> 441B -0.14348  
432B -> 438B -0.21448  
433B -> 439B 0.25269  
433B -> 441B -0.21380

434B -> 441B 0.11065  
435B -> 441B -0.36675  
435B -> 442B -0.11564  
436B -> 441B -0.24140  
436B -> 442B -0.13076

Excited State 67: 1.000-A 2.5770 eV 481.12 nm f=0.0020 <S\*\*2>=0.000

402A -> 437A -0.11027  
407A -> 437A -0.14961  
408A -> 437A 0.11479  
409A -> 437A 0.23785  
413A -> 437A -0.10841  
415A -> 437A 0.24487  
418A -> 437A 0.45509  
419A -> 437A 0.19494  
420A -> 437A -0.12252  
402B -> 437B -0.11026  
407B -> 437B -0.14960  
408B -> 437B 0.11478  
409B -> 437B 0.23790  
413B -> 437B -0.10845  
415B -> 437B 0.24491  
418B -> 437B 0.45535  
419B -> 437B 0.19515  
420B -> 437B -0.12258

Excited State 68: 3.000-A 2.5794 eV 480.68 nm f=0.0000 <S\*\*2>=2.000

397A -> 437A -0.13844  
416A -> 437A -0.18762  
418A -> 437A 0.49501  
418A -> 440A -0.13154  
419A -> 437A 0.34074  
420A -> 437A -0.10556  
397B -> 437B 0.13842  
416B -> 437B 0.18758  
418B -> 437B -0.49474



418B -> 440B 0.13154  
419B -> 437B -0.34065  
420B -> 437B 0.10550

Excited State 69: 1.000-A 2.5853 eV 479.58 nm f=0.0000 <S\*\*2>=0.000

432A -> 438A 0.48182  
433A -> 439A -0.47975  
434A -> 438A -0.11481  
434A -> 439A 0.10106  
432B -> 438B 0.48182  
433B -> 439B -0.47976  
434B -> 438B -0.11481  
434B -> 439B 0.10106

Excited State 70: 3.000-A 2.5872 eV 479.23 nm f=0.0000 <S\*\*2>=2.000

431A -> 440A -0.13611  
432A -> 438A -0.17002  
432A -> 440A -0.13442  
433A -> 439A 0.12727  
433A -> 440A 0.25385  
434A -> 440A 0.51925  
436A -> 444A -0.15750  
431B -> 440B 0.13611  
432B -> 438B 0.17002  
432B -> 440B 0.13441  
433B -> 439B -0.12727  
433B -> 440B -0.25384  
434B -> 440B -0.51923  
436B -> 444B 0.15750

Excited State 71: 3.000-A 2.5880 eV 479.08 nm f=0.0000 <S\*\*2>=2.000

432A -> 438A 0.39428  
433A -> 439A -0.38957  
433A -> 441A -0.11633  
434A -> 438A -0.10258  
434A -> 440A 0.16915

|              |          |
|--------------|----------|
| 435A -> 441A | -0.21260 |
| 436A -> 441A | -0.15115 |
| 432B -> 438B | -0.39427 |
| 433B -> 439B | 0.38956  |
| 433B -> 441B | 0.11633  |
| 434B -> 438B | 0.10258  |
| 434B -> 440B | -0.16915 |
| 435B -> 441B | 0.21260  |
| 436B -> 441B | 0.15114  |

Excited State 72: 3.000-A 2.6035 eV 476.22 nm f=0.0000 <S\*\*2>=2.000

|              |          |
|--------------|----------|
| 433A -> 440A | -0.10154 |
| 433A -> 444A | -0.12090 |
| 434A -> 440A | -0.19073 |
| 434A -> 444A | -0.22524 |
| 435A -> 444A | 0.10494  |
| 436A -> 443A | -0.22452 |
| 436A -> 444A | -0.45415 |
| 433B -> 440B | 0.10152  |
| 433B -> 444B | 0.12090  |
| 434B -> 440B | 0.19069  |
| 434B -> 444B | 0.22523  |
| 435B -> 444B | -0.10493 |
| 436B -> 443B | 0.22453  |
| 436B -> 444B | 0.45415  |

Excited State 73: 1.000-A 2.6067 eV 475.64 nm f=0.0012 <S\*\*2>=0.000

|              |          |
|--------------|----------|
| 431A -> 440A | -0.13853 |
| 432A -> 440A | -0.12103 |
| 433A -> 440A | 0.27821  |
| 434A -> 440A | 0.57682  |
| 436A -> 441A | -0.10917 |
| 436A -> 442A | 0.12735  |
| 431B -> 440B | -0.13854 |
| 432B -> 440B | -0.12104 |
| 433B -> 440B | 0.27823  |

434B -> 440B 0.57685  
436B -> 441B -0.10917  
436B -> 442B 0.12735

Excited State 74: 1.000-A 2.6071 eV 475.56 nm f=0.0146 <S\*\*2>=0.000

414A -> 437A 0.14046  
415A -> 437A 0.18216  
416A -> 437A 0.19746  
417A -> 437A 0.58056  
418A -> 437A -0.12646  
421A -> 437A -0.12366  
414B -> 437B 0.14047  
415B -> 437B 0.18217  
416B -> 437B 0.19745  
417B -> 437B 0.58056  
418B -> 437B -0.12644  
421B -> 437B -0.12366

Excited State 75: 3.000-A 2.6084 eV 475.32 nm f=0.0000 <S\*\*2>=2.000

431A -> 439A 0.17787  
432A -> 438A -0.28214  
432A -> 439A -0.48318  
433A -> 438A 0.15563  
433A -> 439A -0.27858  
431B -> 439B -0.17788  
432B -> 438B 0.28215  
432B -> 439B 0.48319  
433B -> 438B -0.15563  
433B -> 439B 0.27858

Excited State 76: 1.000-A 2.6146 eV 474.20 nm f=0.0001 <S\*\*2>=0.000

431A -> 439A -0.17695  
432A -> 438A 0.27253  
432A -> 439A 0.53907  
433A -> 438A -0.12953  
433A -> 439A 0.23423

431B -> 439B -0.17695  
432B -> 438B 0.27253  
432B -> 439B 0.53906  
433B -> 438B -0.12953  
433B -> 439B 0.23423

Excited State 77: 1.000-A 2.6166 eV 473.84 nm f=0.0093 <S\*\*2>=0.000

434A -> 440A -0.14666  
436A -> 441A -0.45947  
436A -> 442A 0.49405  
434B -> 440B -0.14667  
436B -> 441B -0.45947  
436B -> 442B 0.49405

Excited State 78: 3.000-A 2.6177 eV 473.64 nm f=0.0000 <S\*\*2>=2.000

397A -> 437A 0.12675  
409A -> 437A -0.10817  
413A -> 437A -0.14894  
414A -> 437A 0.48208  
415A -> 437A 0.33372  
416A -> 437A -0.23672  
417A -> 437A -0.10362  
418A -> 437A -0.10998  
397B -> 437B -0.12675  
409B -> 437B 0.10817  
413B -> 437B 0.14893  
414B -> 437B -0.48207  
415B -> 437B -0.33372  
416B -> 437B 0.23672  
417B -> 437B 0.10363  
418B -> 437B 0.10997

Excited State 79: 1.000-A 2.6315 eV 471.16 nm f=0.0011 <S\*\*2>=0.000

406A -> 437A -0.11578  
409A -> 437A -0.16022  
414A -> 437A 0.30090

415A -> 437A 0.46603  
416A -> 437A -0.23442  
417A -> 437A -0.16244  
418A -> 437A -0.12676  
406B -> 437B -0.11578  
409B -> 437B -0.16022  
414B -> 437B 0.30091  
415B -> 437B 0.46604  
416B -> 437B -0.23443  
417B -> 437B -0.16243  
418B -> 437B -0.12676

Excited State 80: 3.000-A 2.6369 eV 470.19 nm f=0.0000 <S\*\*2>=2.000

402A -> 437A 0.14620  
403A -> 437A -0.10740  
409A -> 437A 0.15564  
412A -> 437A 0.15212  
414A -> 437A 0.17684  
415A -> 437A -0.20907  
416A -> 437A -0.22506  
417A -> 437A 0.50550  
402B -> 437B -0.14620  
403B -> 437B 0.10739  
409B -> 437B -0.15564  
412B -> 437B -0.15211  
414B -> 437B -0.17682  
415B -> 437B 0.20907  
416B -> 437B 0.22504  
417B -> 437B -0.50550

Excited State 81: 1.000-A 2.6510 eV 467.69 nm f=0.0135 <S\*\*2>=0.000

397A -> 437A 0.12133  
410A -> 437A 0.16686  
413A -> 437A -0.18052  
414A -> 437A 0.35973  
415A -> 437A -0.28115

416A -> 437A -0.33574  
417A -> 437A 0.14466  
435A -> 443A -0.14833  
397B -> 437B 0.12134  
410B -> 437B 0.16686  
413B -> 437B -0.18052  
414B -> 437B 0.35973  
415B -> 437B -0.28114  
416B -> 437B -0.33576  
417B -> 437B 0.14467  
435B -> 443B -0.14832

Excited State 82: 3.000-A 2.6557 eV 466.86 nm f=0.0000 <S\*\*2>=2.000

407A -> 437A 0.10740  
409A -> 437A 0.14598  
410A -> 437A 0.14579  
413A -> 437A 0.16305  
414A -> 437A -0.36159  
415A -> 437A 0.41304  
416A -> 437A -0.25618  
418A -> 437A -0.10838  
407B -> 437B -0.10740  
409B -> 437B -0.14599  
410B -> 437B -0.14578  
413B -> 437B -0.16305  
414B -> 437B 0.36160  
415B -> 437B -0.41304  
416B -> 437B 0.25617  
418B -> 437B 0.10838

Excited State 83: 1.000-A 2.6736 eV 463.74 nm f=0.0025 <S\*\*2>=0.000

407A -> 437A -0.16032  
409A -> 437A -0.15808  
410A -> 437A -0.19698  
413A -> 437A -0.19159  
414A -> 437A 0.38617

415A -> 437A -0.21100  
416A -> 437A 0.33458  
417A -> 437A -0.12251  
407B -> 437B -0.16033  
409B -> 437B -0.15808  
410B -> 437B -0.19698  
413B -> 437B -0.19160  
414B -> 437B 0.38618  
415B -> 437B -0.21100  
416B -> 437B 0.33459  
417B -> 437B -0.12251

Excited State 84: 1.000-A 2.6920 eV 460.56 nm f=0.0009 <S\*\*2>=0.000

435A -> 441A 0.11476  
436A -> 441A 0.50840  
436A -> 442A 0.45849  
435B -> 441B 0.11474  
436B -> 441B 0.50846  
436B -> 442B 0.45852

Excited State 85: 3.000-A 2.7001 eV 459.18 nm f=0.0000 <S\*\*2>=2.000

433A -> 441A -0.11730  
435A -> 441A -0.25252  
435A -> 443A -0.13292  
436A -> 441A 0.49251  
436A -> 442A 0.24096  
436A -> 448A -0.12400  
433B -> 441B 0.11731  
435B -> 441B 0.25252  
435B -> 443B 0.13292  
436B -> 441B -0.49245  
436B -> 442B -0.24090  
436B -> 448B 0.12400

Excited State 86: 1.000-A 2.7036 eV 458.60 nm f=0.0238 <S\*\*2>=0.000

402A -> 437A -0.13496

|              |          |
|--------------|----------|
| 403A -> 437A | 0.13619  |
| 404A -> 437A | 0.16676  |
| 406A -> 437A | 0.15767  |
| 407A -> 437A | 0.13583  |
| 409A -> 437A | -0.15340 |
| 410A -> 437A | 0.35493  |
| 413A -> 437A | -0.18239 |
| 415A -> 437A | 0.17892  |
| 416A -> 437A | 0.28074  |
| 417A -> 437A | -0.14114 |
| 435A -> 443A | -0.12074 |
| 402B -> 437B | -0.13496 |
| 403B -> 437B | 0.13620  |
| 404B -> 437B | 0.16676  |
| 406B -> 437B | 0.15767  |
| 407B -> 437B | 0.13583  |
| 409B -> 437B | -0.15340 |
| 410B -> 437B | 0.35493  |
| 413B -> 437B | -0.18238 |
| 415B -> 437B | 0.17892  |
| 416B -> 437B | 0.28073  |
| 417B -> 437B | -0.14114 |
| 435B -> 443B | -0.12071 |

Excited State 87: 3.000-A 2.7117 eV 457.23 nm f=0.0000 <S\*\*2>=2.000

|              |          |
|--------------|----------|
| 431A -> 438A | 0.46612  |
| 431A -> 439A | -0.38689 |
| 432A -> 439A | -0.25645 |
| 434A -> 439A | 0.16975  |
| 431B -> 438B | -0.46611 |
| 431B -> 439B | 0.38689  |
| 432B -> 439B | 0.25644  |
| 434B -> 439B | -0.16975 |

Excited State 88: 3.000-A 2.7172 eV 456.30 nm f=0.0000 <S\*\*2>=2.000

|              |         |
|--------------|---------|
| 433A -> 443A | 0.10335 |
|--------------|---------|



435A -> 443A -0.57114  
 435A -> 444A 0.18191  
 436A -> 441A -0.14516  
 436A -> 443A -0.13327  
 433B -> 443B -0.10335  
 435B -> 443B 0.57114  
 435B -> 444B -0.18191  
 436B -> 441B 0.14516  
 436B -> 443B 0.13327

Excited State 89: 1.000-A 2.7172 eV 456.29 nm f=0.0000 <S\*\*2>=0.000

431A -> 438A 0.49270  
 431A -> 439A -0.39067  
 432A -> 439A -0.22758  
 434A -> 439A 0.15662  
 431B -> 438B 0.49271  
 431B -> 439B -0.39068  
 432B -> 439B -0.22759  
 434B -> 439B 0.15663

Excited State 90: 3.000-A 2.7302 eV 454.12 nm f=0.0000 <S\*\*2>=2.000

430A -> 438A 0.12803  
 432A -> 440A -0.18499  
 433A -> 440A 0.55011  
 434A -> 440A -0.34276  
 430B -> 438B -0.12802  
 432B -> 440B 0.18496  
 433B -> 440B -0.54996  
 434B -> 440B 0.34268

Excited State 91: 3.000-A 2.7307 eV 454.03 nm f=0.0000 <S\*\*2>=2.000

428A -> 438A 0.34021  
 428A -> 439A 0.10568  
 429A -> 438A -0.10734  
 430A -> 438A 0.48936  
 431A -> 439A 0.13036

432A -> 438A -0.10977  
433A -> 438A -0.13211  
433A -> 440A -0.14139  
428B -> 438B -0.34018  
428B -> 439B -0.10568  
429B -> 438B 0.10733  
430B -> 438B -0.48931  
431B -> 439B -0.13035  
432B -> 438B 0.10976  
433B -> 438B 0.13210  
433B -> 440B 0.14135

Excited State 92: 1.000-A 2.7329 eV 453.67 nm f=0.0000 <S\*\*2>=0.000

432A -> 440A -0.11462  
433A -> 440A 0.60720  
434A -> 440A -0.32699  
432B -> 440B -0.11467  
433B -> 440B 0.60735  
434B -> 440B -0.32708

Excited State 93: 3.000-A 2.7361 eV 453.13 nm f=0.0000 <S\*\*2>=2.000

396A -> 437A 0.17017  
402A -> 437A -0.13022  
403A -> 437A 0.13682  
404A -> 437A 0.11616  
405A -> 437A -0.12278  
410A -> 437A -0.22874  
413A -> 437A 0.50072  
414A -> 437A 0.11616  
416A -> 437A -0.20018  
396B -> 437B -0.17016  
402B -> 437B 0.13022  
403B -> 437B -0.13682  
404B -> 437B -0.11616  
405B -> 437B 0.12278  
410B -> 437B 0.22874

413B -> 437B -0.50072  
414B -> 437B -0.11616  
416B -> 437B 0.20018

Excited State 94: 1.000-A 2.7425 eV 452.09 nm f=0.0001 <S\*\*2>=0.000

428A -> 438A 0.33650  
428A -> 439A 0.10680  
430A -> 438A 0.55054  
431A -> 439A 0.15058  
433A -> 438A -0.12277  
428B -> 438B 0.33653  
428B -> 439B 0.10680  
430B -> 438B 0.55059  
431B -> 439B 0.15059  
433B -> 438B -0.12278

Excited State 95: 1.000-A 2.7659 eV 448.27 nm f=0.0022 <S\*\*2>=0.000

404A -> 437A 0.13914  
405A -> 437A -0.11636  
406A -> 437A 0.11931  
412A -> 437A 0.32769  
413A -> 437A 0.45969  
414A -> 437A 0.23060  
417A -> 437A -0.17751  
404B -> 437B 0.13914  
405B -> 437B -0.11636  
406B -> 437B 0.11930  
412B -> 437B 0.32769  
413B -> 437B 0.45969  
414B -> 437B 0.23060  
417B -> 437B -0.17751

Excited State 96: 3.000-A 2.7672 eV 448.05 nm f=0.0000 <S\*\*2>=2.000

412A -> 437A 0.21838  
431A -> 438A 0.10904  
431A -> 439A 0.14266

|              |          |
|--------------|----------|
| 431A -> 442A | -0.10001 |
| 432A -> 440A | 0.28157  |
| 433A -> 440A | 0.14673  |
| 434A -> 442A | -0.12303 |
| 436A -> 441A | 0.17112  |
| 436A -> 443A | 0.13232  |
| 436A -> 446A | 0.10941  |
| 436A -> 448A | 0.25186  |
| 412B -> 437B | -0.21838 |
| 431B -> 438B | -0.10904 |
| 431B -> 439B | -0.14266 |
| 431B -> 442B | 0.10001  |
| 432B -> 440B | -0.28156 |
| 433B -> 440B | -0.14673 |
| 434B -> 442B | 0.12303  |
| 436B -> 441B | -0.17111 |
| 436B -> 443B | -0.13232 |
| 436B -> 446B | -0.10941 |
| 436B -> 448B | -0.25186 |

Excited State 97: 3.000-A 2.7717 eV 447.33 nm f=0.0000 <S\*\*2>=2.000

|              |          |
|--------------|----------|
| 407A -> 437A | -0.12559 |
| 410A -> 437A | 0.14018  |
| 412A -> 437A | 0.50323  |
| 414A -> 437A | 0.10183  |
| 416A -> 437A | 0.15437  |
| 417A -> 437A | -0.15284 |
| 432A -> 440A | -0.22135 |
| 433A -> 440A | -0.10822 |
| 407B -> 437B | 0.12559  |
| 410B -> 437B | -0.14018 |
| 412B -> 437B | -0.50323 |
| 414B -> 437B | -0.10183 |
| 416B -> 437B | -0.15437 |
| 417B -> 437B | 0.15283  |
| 432B -> 440B | 0.22134  |

433B -> 440B 0.10822

Excited State 98: 3.000-A 2.7768 eV 446.50 nm f=0.0000 <S\*\*2>=2.000

428A -> 438A 0.14003

431A -> 438A -0.40307

431A -> 439A -0.37205

432A -> 440A 0.33500

433A -> 440A 0.14133

428B -> 438B -0.14004

431B -> 438B 0.40307

431B -> 439B 0.37206

432B -> 440B -0.33499

433B -> 440B -0.14133

Excited State 99: 1.000-A 2.7809 eV 445.84 nm f=0.0004 <S\*\*2>=0.000

428A -> 438A -0.15563

431A -> 438A 0.46773

431A -> 439A 0.47118

434A -> 439A -0.10145

428B -> 438B -0.15563

431B -> 438B 0.46772

431B -> 439B 0.47118

434B -> 439B -0.10145

Excited State 100: 3.000-A 2.7842 eV 445.32 nm f=0.0000 <S\*\*2>=2.000

431A -> 438A 0.23918

431A -> 439A 0.20655

432A -> 440A 0.38204

433A -> 440A 0.13415

436A -> 441A -0.11870

436A -> 443A -0.10525

436A -> 448A -0.22837

431B -> 438B -0.23917

431B -> 439B -0.20655

432B -> 440B -0.38203

433B -> 440B -0.13415

436B -> 441B 0.11870  
436B -> 443B 0.10525  
436B -> 448B 0.22837

Excited State 101: 1.000-A 2.7876 eV 444.78 nm f=0.0039 <S\*\*2>=0.000

402A -> 437A 0.11880  
403A -> 437A -0.11512  
407A -> 437A -0.13848  
410A -> 437A 0.10236  
412A -> 437A 0.54413  
413A -> 437A -0.28843  
414A -> 437A -0.11449  
416A -> 437A 0.10053  
402B -> 437B 0.11880  
403B -> 437B -0.11512  
407B -> 437B -0.13849  
410B -> 437B 0.10236  
412B -> 437B 0.54413  
413B -> 437B -0.28843  
414B -> 437B -0.11449  
416B -> 437B 0.10053

Excited State 102: 1.000-A 2.7969 eV 443.29 nm f=0.0011 <S\*\*2>=0.000

432A -> 440A 0.66833  
433A -> 440A 0.16729  
432B -> 440B 0.66835  
433B -> 440B 0.16729

Excited State 103: 3.000-A 2.8012 eV 442.62 nm f=0.0000 <S\*\*2>=2.000

428A -> 438A 0.20523  
429A -> 438A -0.38188  
430A -> 438A -0.28788  
430A -> 439A 0.43240  
432A -> 439A -0.11626  
428B -> 438B -0.20523  
429B -> 438B 0.38186

430B -> 438B 0.28788  
430B -> 439B -0.43240  
432B -> 439B 0.11626

Excited State 104: 1.000-A 2.8100 eV 441.23 nm f=0.0076 <S\*\*2>=0.000

433A -> 441A 0.11729  
435A -> 441A 0.63780  
435A -> 442A 0.15868  
433B -> 441B 0.11729  
435B -> 441B 0.63780  
435B -> 442B 0.15868

Excited State 105: 1.000-A 2.8114 eV 441.00 nm f=0.0003 <S\*\*2>=0.000

428A -> 438A 0.25212  
429A -> 438A -0.35039  
430A -> 438A -0.24048  
430A -> 439A 0.46571  
435A -> 441A 0.11908  
428B -> 438B 0.25213  
429B -> 438B -0.35039  
430B -> 438B -0.24048  
430B -> 439B 0.46572  
435B -> 441B 0.11908

Excited State 106: 3.000-A 2.8145 eV 440.52 nm f=0.0000 <S\*\*2>=2.000

401A -> 437A -0.11596  
405A -> 437A 0.20823  
406A -> 437A -0.21681  
409A -> 437A 0.18265  
410A -> 437A 0.33090  
411A -> 437A -0.18846  
412A -> 437A -0.25282  
413A -> 437A 0.28011  
414A -> 437A 0.19279  
401B -> 437B 0.11596  
405B -> 437B -0.20822

406B -> 437B 0.21680  
409B -> 437B -0.18264  
410B -> 437B -0.33089  
411B -> 437B 0.18846  
412B -> 437B 0.25281  
413B -> 437B -0.28010  
414B -> 437B -0.19279

Excited State 107: 3.000-A 2.8241 eV 439.02 nm f=0.0000 <S\*\*2>=2.000

428A -> 438A 0.17964  
429A -> 438A 0.36541  
429A -> 439A 0.12338  
430A -> 439A 0.26167  
431A -> 442A -0.13223  
434A -> 442A -0.14565  
436A -> 442A -0.11107  
436A -> 448A -0.11723  
436A -> 450A 0.17574  
428B -> 438B -0.17963  
429B -> 438B -0.36540  
429B -> 439B -0.12338  
430B -> 439B -0.26166  
431B -> 442B 0.13223  
434B -> 442B 0.14565  
436B -> 442B 0.11107  
436B -> 448B 0.11724  
436B -> 450B -0.17575

Excited State 108: 1.000-A 2.8291 eV 438.25 nm f=0.0051 <S\*\*2>=0.000

405A -> 437A 0.12672  
406A -> 437A -0.11757  
410A -> 437A 0.23059  
411A -> 437A -0.11583  
413A -> 437A 0.12032  
436A -> 443A 0.34647  
436A -> 444A 0.43932



405B -> 437B 0.12725  
406B -> 437B -0.11766  
410B -> 437B 0.23103  
411B -> 437B -0.11586  
413B -> 437B 0.12030  
436B -> 443B 0.34652  
436B -> 444B 0.43951

Excited State 109: 3.000-A 2.8291 eV 438.25 nm f=0.0000 <S\*\*2>=2.000

402A -> 437A -0.13396  
405A -> 437A 0.12425  
407A -> 437A -0.26802  
409A -> 437A -0.26708  
410A -> 437A 0.10268  
416A -> 437A -0.19280  
429A -> 438A 0.31635  
430A -> 439A 0.17545  
436A -> 450A -0.10474  
402B -> 437B 0.13403  
405B -> 437B -0.12368  
407B -> 437B 0.26771  
409B -> 437B 0.26743  
410B -> 437B -0.10166  
416B -> 437B 0.19288  
429B -> 438B -0.31602  
430B -> 439B -0.17536  
436B -> 450B 0.10463

Excited State 110: 3.000-A 2.8317 eV 437.84 nm f=0.0000 <S\*\*2>=2.000

407A -> 437A -0.25517  
409A -> 437A -0.23553  
416A -> 437A -0.16260  
429A -> 438A -0.23280  
430A -> 439A -0.11910  
431A -> 442A -0.13531  
434A -> 442A -0.14212

|              |          |
|--------------|----------|
| 436A -> 442A | -0.10077 |
| 436A -> 448A | -0.10539 |
| 436A -> 450A | 0.18292  |
| 407B -> 437B | 0.25526  |
| 409B -> 437B | 0.23549  |
| 416B -> 437B | 0.16260  |
| 429B -> 438B | 0.23273  |
| 430B -> 439B | 0.11906  |
| 431B -> 442B | 0.13531  |
| 434B -> 442B | 0.14212  |
| 436B -> 442B | 0.10079  |
| 436B -> 448B | 0.10541  |
| 436B -> 450B | -0.18292 |

Excited State 111: 1.000-A 2.8320 eV 437.80 nm f=0.0032 <S\*\*2>=0.000

|              |          |
|--------------|----------|
| 397A -> 437A | -0.11272 |
| 405A -> 437A | 0.23518  |
| 406A -> 437A | -0.19482 |
| 407A -> 437A | -0.17199 |
| 410A -> 437A | 0.34246  |
| 411A -> 437A | -0.15773 |
| 413A -> 437A | 0.14223  |
| 436A -> 443A | -0.21482 |
| 436A -> 444A | -0.29764 |
| 397B -> 437B | -0.11273 |
| 405B -> 437B | 0.23514  |
| 406B -> 437B | -0.19483 |
| 407B -> 437B | -0.17188 |
| 410B -> 437B | 0.34242  |
| 411B -> 437B | -0.15773 |
| 413B -> 437B | 0.14222  |
| 436B -> 443B | -0.21481 |
| 436B -> 444B | -0.29761 |

Excited State 112: 1.000-A 2.8340 eV 437.49 nm f=0.0002 <S\*\*2>=0.000

|              |         |
|--------------|---------|
| 428A -> 438A | 0.18151 |
|--------------|---------|

429A -> 438A 0.57401  
429A -> 439A 0.15408  
430A -> 439A 0.28884  
428B -> 438B 0.18152  
429B -> 438B 0.57405  
429B -> 439B 0.15409  
430B -> 439B 0.28886

Excited State 113: 3.000-A 2.8397 eV 436.60 nm f=0.0000 <S\*\*2>=2.000

401A -> 437A 0.24327  
402A -> 437A 0.23714  
405A -> 437A -0.23807  
406A -> 437A 0.32072  
407A -> 437A -0.24912  
410A -> 437A 0.10474  
412A -> 437A -0.26049  
413A -> 437A 0.14696  
401B -> 437B -0.24327  
402B -> 437B -0.23714  
405B -> 437B 0.23807  
406B -> 437B -0.32071  
407B -> 437B 0.24911  
410B -> 437B -0.10473  
412B -> 437B 0.26048  
413B -> 437B -0.14696

Excited State 114: 1.000-A 2.8437 eV 435.99 nm f=0.0065 <S\*\*2>=0.000

402A -> 437A 0.17643  
403A -> 437A -0.15052  
406A -> 437A -0.12634  
407A -> 437A 0.33734  
408A -> 437A -0.10665  
409A -> 437A 0.46573  
416A -> 437A 0.20547  
402B -> 437B 0.17643  
403B -> 437B -0.15052

406B -> 437B -0.12635  
407B -> 437B 0.33738  
408B -> 437B -0.10664  
409B -> 437B 0.46574  
416B -> 437B 0.20547

Excited State 115: 3.000-A 2.8635 eV 432.99 nm f=0.0000 <S\*\*2>=2.000

391A -> 438A -0.13698  
428A -> 438A 0.41307  
428A -> 439A 0.10164  
430A -> 438A -0.32969  
430A -> 439A -0.37213  
391B -> 438B 0.13699  
428B -> 438B -0.41306  
428B -> 439B -0.10164  
430B -> 438B 0.32969  
430B -> 439B 0.37212

Excited State 116: 1.000-A 2.8648 eV 432.79 nm f=0.0156 <S\*\*2>=0.000

397A -> 437A 0.10286  
401A -> 437A 0.25175  
402A -> 437A 0.31109  
403A -> 437A -0.15607  
405A -> 437A -0.23408  
406A -> 437A 0.28672  
407A -> 437A -0.24505  
410A -> 437A 0.11468  
412A -> 437A -0.19163  
397B -> 437B 0.10286  
401B -> 437B 0.25175  
402B -> 437B 0.31109  
403B -> 437B -0.15607  
405B -> 437B -0.23409  
406B -> 437B 0.28673  
407B -> 437B -0.24506  
410B -> 437B 0.11469

412B -> 437B -0.19163

Excited State 117: 1.000-A 2.8700 eV 431.99 nm f=0.0002 <S\*\*2>=0.000

428A -> 438A 0.46612

428A -> 439A 0.11052

430A -> 438A -0.31384

430A -> 439A -0.38024

428B -> 438B 0.46613

428B -> 439B 0.11053

430B -> 438B -0.31385

430B -> 439B -0.38025

Excited State 118: 3.000-A 2.8937 eV 428.46 nm f=0.0000 <S\*\*2>=2.000

391A -> 438A 0.13677

428A -> 441A 0.21835

430A -> 441A 0.11763

433A -> 441A 0.11972

433A -> 447A 0.14417

434A -> 441A -0.12613

435A -> 441A -0.23698

435A -> 442A -0.12648

435A -> 445A 0.17152

435A -> 447A 0.20076

435A -> 455A -0.13873

391B -> 438B -0.13677

428B -> 441B -0.21835

430B -> 441B -0.11762

433B -> 441B -0.11972

433B -> 447B -0.14417

434B -> 441B 0.12613

435B -> 441B 0.23699

435B -> 442B 0.12648

435B -> 445B -0.17152

435B -> 447B -0.20076

435B -> 455B 0.13873

Excited State 119: 3.000-A 2.9077 eV 426.40 nm f=0.0000 <S\*\*2>=2.000

|              |          |
|--------------|----------|
| 390A -> 439A | -0.12477 |
| 391A -> 439A | 0.10000  |
| 392A -> 438A | 0.22526  |
| 392A -> 439A | -0.50963 |
| 404A -> 439A | 0.18648  |
| 390B -> 439B | 0.12477  |
| 391B -> 439B | -0.10001 |
| 392B -> 438B | -0.22526 |
| 392B -> 439B | 0.50963  |
| 404B -> 439B | -0.18648 |

Excited State 120: 3.000-A 2.9107 eV 425.97 nm f=0.0000 <S\*\*2>=2.000

|              |          |
|--------------|----------|
| 394A -> 451A | -0.10801 |
| 395A -> 440A | -0.57756 |
| 412A -> 440A | 0.17821  |
| 413A -> 440A | 0.10073  |
| 416A -> 440A | -0.10085 |
| 432A -> 440A | 0.11082  |
| 394B -> 451B | 0.10801  |
| 395B -> 440B | 0.57756  |
| 412B -> 440B | -0.17822 |
| 413B -> 440B | -0.10073 |
| 416B -> 440B | 0.10085  |
| 432B -> 440B | -0.11082 |
| 395A <- 440A | -0.11132 |
| 395B <- 440B | 0.11132  |

Excited State 121: 3.000-A 2.9126 eV 425.68 nm f=0.0000 <S\*\*2>=2.000

|              |          |
|--------------|----------|
| 390A -> 438A | -0.16441 |
| 391A -> 438A | 0.46644  |
| 391A -> 439A | 0.16186  |
| 392A -> 439A | 0.11566  |
| 401A -> 438A | 0.15617  |
| 428A -> 438A | 0.19188  |
| 390B -> 438B | 0.16441  |

391B -> 438B -0.46645  
391B -> 439B -0.16186  
392B -> 439B -0.11566  
401B -> 438B -0.15617  
428B -> 438B -0.19188

Excited State 122: 1.000-A 2.9277 eV 423.48 nm f=0.0138 <S\*\*2>=0.000

396A -> 437A -0.11906  
397A -> 437A 0.38849  
435A -> 443A 0.31071  
436A -> 443A 0.32062  
436A -> 444A -0.27030  
396B -> 437B -0.11906  
397B -> 437B 0.38849  
435B -> 443B 0.31072  
436B -> 443B 0.32060  
436B -> 444B -0.27029

Excited State 123: 3.000-A 2.9473 eV 420.67 nm f=0.0000 <S\*\*2>=2.000

429A -> 439A -0.23155  
433A -> 443A -0.10742  
434A -> 442A -0.10564  
435A -> 443A 0.10027  
436A -> 443A -0.50482  
436A -> 444A 0.27754  
429B -> 439B 0.23152  
433B -> 443B 0.10742  
434B -> 442B 0.10564  
435B -> 443B -0.10026  
436B -> 443B 0.50483  
436B -> 444B -0.27754

Excited State 124: 3.000-A 2.9497 eV 420.32 nm f=0.0000 <S\*\*2>=2.000

429A -> 438A -0.10441  
429A -> 439A 0.62112  
430A -> 439A -0.15581

436A -> 443A -0.20089  
429B -> 438B 0.10438  
429B -> 439B -0.62094  
430B -> 439B 0.15577  
436B -> 443B 0.20089

Excited State 125: 1.000-A 2.9516 eV 420.06 nm f=0.0001 <S\*\*2>=0.000

429A -> 438A -0.10137  
429A -> 439A 0.66913  
430A -> 439A -0.15739  
429B -> 438B -0.10140  
429B -> 439B 0.66931  
430B -> 439B -0.15743

Excited State 126: 3.000-A 2.9754 eV 416.70 nm f=0.0000 <S\*\*2>=2.000

431A -> 442A -0.12384  
434A -> 441A 0.11681  
434A -> 442A -0.27137  
434A -> 444A -0.11890  
436A -> 442A -0.17708  
436A -> 443A 0.20572  
436A -> 444A 0.12318  
436A -> 446A -0.19694  
436A -> 448A -0.15362  
436A -> 450A -0.21014  
436A -> 459A -0.10040  
431B -> 442B 0.12384  
434B -> 441B -0.11681  
434B -> 442B 0.27137  
434B -> 444B 0.11890  
436B -> 442B 0.17708  
436B -> 443B -0.20571  
436B -> 444B -0.12318  
436B -> 446B 0.19694  
436B -> 448B 0.15362  
436B -> 450B 0.21014



436B -> 459B 0.10040

Excited State 127: 1.000-A 2.9780 eV 416.33 nm f=0.0218 <S\*\*2>=0.000

396A -> 437A 0.10732

397A -> 437A -0.27361

435A -> 443A -0.26621

436A -> 443A 0.44887

436A -> 444A -0.32902

396B -> 437B 0.10732

397B -> 437B -0.27362

435B -> 443B -0.26621

436B -> 443B 0.44888

436B -> 444B -0.32902

Excited State 128: 3.000-A 2.9864 eV 415.16 nm f=0.0000 <S\*\*2>=2.000

428A -> 439A -0.36293

433A -> 442A 0.10888

435A -> 441A -0.28716

435A -> 442A 0.40584

428B -> 439B 0.36286

433B -> 442B -0.10887

435B -> 441B 0.28715

435B -> 442B -0.40576

Excited State 129: 3.000-A 2.9899 eV 414.68 nm f=0.0000 <S\*\*2>=2.000

408A -> 437A 0.12913

410A -> 437A 0.21388

411A -> 437A 0.64343

408B -> 437B -0.12906

410B -> 437B -0.21374

411B -> 437B -0.64305

Excited State 130: 1.000-A 2.9903 eV 414.62 nm f=0.0000 <S\*\*2>=0.000

408A -> 437A 0.12846

410A -> 437A 0.22698

411A -> 437A 0.64063

408B -> 437B 0.12855  
410B -> 437B 0.22711  
411B -> 437B 0.64102

Excited State 131: 1.000-A 2.9909 eV 414.54 nm f=0.0005 <S\*\*2>=0.000

428A -> 438A -0.14078  
428A -> 439A 0.67752  
428B -> 438B -0.14075  
428B -> 439B 0.67735

Excited State 132: 3.000-A 2.9932 eV 414.21 nm f=0.0000 <S\*\*2>=2.000

428A -> 438A 0.12447  
428A -> 439A -0.55676  
435A -> 441A 0.18530  
435A -> 442A -0.30071  
428B -> 438B -0.12452  
428B -> 439B 0.55701  
435B -> 441B -0.18528  
435B -> 442B 0.30063

Excited State 133: 1.000-A 3.0083 eV 412.14 nm f=0.0024 <S\*\*2>=0.000

435A -> 441A -0.17395  
435A -> 442A 0.66536  
435B -> 441B -0.17401  
435B -> 442B 0.66543

Excited State 134: 3.000-A 3.0199 eV 410.56 nm f=0.0000 <S\*\*2>=2.000

430A -> 440A -0.12432  
431A -> 440A -0.38850  
431A -> 444A 0.11823  
433A -> 444A -0.11502  
434A -> 443A -0.12248  
434A -> 444A -0.23206  
434A -> 448A -0.13659  
436A -> 444A 0.25764  
436A -> 450A 0.13377

430B -> 440B 0.12433  
431B -> 440B 0.38852  
431B -> 444B -0.11823  
433B -> 444B 0.11502  
434B -> 443B 0.12248  
434B -> 444B 0.23206  
434B -> 448B 0.13659  
436B -> 444B -0.25764  
436B -> 450B -0.13377

Excited State 135: 3.000-A 3.0277 eV 409.50 nm f=0.0000 <S\*\*2>=2.000

407A -> 437A -0.30133  
408A -> 437A -0.60157  
409A -> 437A 0.11504  
411A -> 437A 0.14746  
407B -> 437B 0.30151  
408B -> 437B 0.60206  
409B -> 437B -0.11512  
411B -> 437B -0.14758

Excited State 136: 1.000-A 3.0281 eV 409.45 nm f=0.0000 <S\*\*2>=0.000

407A -> 437A 0.29728  
408A -> 437A 0.60933  
409A -> 437A -0.10958  
411A -> 437A -0.14430  
407B -> 437B 0.29701  
408B -> 437B 0.60889  
409B -> 437B -0.10950  
411B -> 437B -0.14419

Excited State 137: 1.000-A 3.0293 eV 409.29 nm f=0.0001 <S\*\*2>=0.000

418A -> 440A 0.10621  
430A -> 440A 0.18089  
431A -> 440A 0.65297  
434A -> 440A 0.10568  
418B -> 440B 0.10621

430B -> 440B 0.18091  
431B -> 440B 0.65307  
434B -> 440B 0.10570

Excited State 138: 3.000-A 3.0315 eV 408.99 nm f=0.0000 <S\*\*2>=2.000

430A -> 440A 0.15349  
431A -> 440A 0.52140  
434A -> 444A -0.17985  
436A -> 444A 0.19270  
436A -> 450A 0.10340  
430B -> 440B -0.15345  
431B -> 440B -0.52126  
434B -> 444B 0.17985  
436B -> 444B -0.19269  
436B -> 450B -0.10339

Excited State 139: 1.000-A 3.0480 eV 406.78 nm f=0.0000 <S\*\*2>=0.000

407A -> 438A 0.25592  
408A -> 438A 0.56270  
408A -> 439A 0.21176  
411A -> 438A 0.13017  
407B -> 438B 0.25588  
408B -> 438B 0.56272  
408B -> 439B 0.21176  
411B -> 438B 0.13017

Excited State 140: 3.000-A 3.0525 eV 406.18 nm f=0.0000 <S\*\*2>=2.000

398A -> 437A 0.11152  
428A -> 441A 0.15888  
433A -> 441A 0.17189  
433A -> 445A -0.10016  
433A -> 447A -0.11254  
434A -> 441A -0.14684  
435A -> 441A -0.15174  
435A -> 442A -0.38439  
435A -> 445A -0.13084

435A -> 447A -0.18058  
398B -> 437B -0.11152  
428B -> 441B -0.15889  
433B -> 441B -0.17189  
433B -> 445B 0.10016  
433B -> 447B 0.11254  
434B -> 441B 0.14684  
435B -> 441B 0.15173  
435B -> 442B 0.38442  
435B -> 445B 0.13084  
435B -> 447B 0.18058

Excited State 141: 1.000-A 3.0539 eV 405.99 nm f=0.0000 <S\*\*2>=0.000

408A -> 439A -0.10237  
410A -> 439A 0.20297  
411A -> 438A -0.23705  
411A -> 439A 0.59047  
408B -> 439B -0.10237  
410B -> 439B 0.20297  
411B -> 438B -0.23705  
411B -> 439B 0.59048

Excited State 142: 1.000-A 3.0593 eV 405.27 nm f=0.0000 <S\*\*2>=0.000

418A -> 440A 0.50072  
419A -> 440A 0.27242  
420A -> 440A -0.10700  
430A -> 440A 0.30182  
431A -> 440A -0.18761  
418B -> 440B 0.50071  
419B -> 440B 0.27244  
420B -> 440B -0.10700  
430B -> 440B 0.30180  
431B -> 440B -0.18759

Excited State 143: 3.000-A 3.0613 eV 405.01 nm f=0.0000 <S\*\*2>=2.000

405A -> 437A -0.11441

406A -> 437A -0.10667  
428A -> 440A 0.16425  
430A -> 440A -0.61188  
431A -> 440A 0.17837  
432A -> 440A -0.12473  
405B -> 437B 0.11440  
406B -> 437B 0.10667  
428B -> 440B -0.16425  
430B -> 440B 0.61190  
431B -> 440B -0.17837  
432B -> 440B 0.12473

Excited State 144: 3.000-A 3.0621 eV 404.90 nm f=0.0000 <S\*\*2>=2.000

396A -> 437A -0.12304  
398A -> 437A 0.20765  
405A -> 437A 0.40914  
406A -> 437A 0.39737  
410A -> 437A -0.10963  
430A -> 440A -0.16318  
396B -> 437B 0.12304  
398B -> 437B -0.20764  
405B -> 437B -0.40911  
406B -> 437B -0.39734  
410B -> 437B 0.10962  
430B -> 440B 0.16318

Excited State 145: 1.000-A 3.0665 eV 404.32 nm f=0.0003 <S\*\*2>=0.000

398A -> 437A 0.12973  
404A -> 437A -0.18585  
405A -> 437A 0.41881  
406A -> 437A 0.47637  
407A -> 437A 0.11434  
398B -> 437B 0.12970  
404B -> 437B -0.18583  
405B -> 437B 0.41885  
406B -> 437B 0.47639

407B -> 437B 0.11435

Excited State 146: 3.000-A 3.0670 eV 404.25 nm f=0.0000 <S\*\*2>=2.000

393A -> 437A -0.13548  
396A -> 437A -0.16096  
397A -> 437A -0.12458  
398A -> 437A -0.38003  
402A -> 437A 0.34494  
403A -> 437A 0.18491  
404A -> 437A 0.25319  
405A -> 437A 0.10446  
393B -> 437B 0.13548  
396B -> 437B 0.16095  
397B -> 437B 0.12457  
398B -> 437B 0.38004  
402B -> 437B -0.34492  
403B -> 437B -0.18490  
404B -> 437B -0.25320  
405B -> 437B -0.10440

Excited State 147: 3.000-A 3.0716 eV 403.65 nm f=0.0000 <S\*\*2>=2.000

393A -> 437A 0.10468  
398A -> 437A 0.31166  
401A -> 437A 0.13579  
402A -> 437A 0.22537  
403A -> 437A 0.45798  
406A -> 437A -0.23899  
393B -> 437B -0.10468  
398B -> 437B -0.31164  
401B -> 437B -0.13576  
402B -> 437B -0.22522  
403B -> 437B -0.45780  
406B -> 437B 0.23899

Excited State 148: 1.000-A 3.0725 eV 403.52 nm f=0.0002 <S\*\*2>=0.000

402A -> 437A 0.41664

403A -> 437A 0.47986  
404A -> 437A 0.12080  
405A -> 437A 0.25011  
402B -> 437B 0.41674  
403B -> 437B 0.48004  
404B -> 437B 0.12084  
405B -> 437B 0.25012

Excited State 149: 1.000-A 3.0742 eV 403.31 nm f=0.0001 <S\*\*2>=0.000

418A -> 440A -0.29647  
419A -> 440A -0.15221  
428A -> 440A -0.13575  
430A -> 440A 0.57777  
418B -> 440B -0.29646  
419B -> 440B -0.15222  
428B -> 440B -0.13575  
430B -> 440B 0.57778

Excited State 150: 1.000-A 3.0818 eV 402.31 nm f=0.0001 <S\*\*2>=0.000

401A -> 437A 0.12848  
403A -> 437A -0.32433  
404A -> 437A 0.55108  
405A -> 437A 0.23027  
401B -> 437B 0.12836  
403B -> 437B -0.32410  
404B -> 437B 0.55067  
405B -> 437B 0.23016

Excited State 151: 3.000-A 3.0825 eV 402.22 nm f=0.0000 <S\*\*2>=2.000

398A -> 437A -0.18316  
401A -> 437A -0.16525  
403A -> 437A 0.30892  
404A -> 437A -0.54399  
405A -> 437A -0.14348  
398B -> 437B 0.18310  
401B -> 437B 0.16535



403B -> 437B -0.30917  
404B -> 437B 0.54440  
405B -> 437B 0.14365

Excited State 152: 3.000-A 3.0885 eV 401.44 nm f=0.0000 <S\*\*2>=2.000

396A -> 437A 0.10015  
398A -> 437A -0.27916  
401A -> 437A 0.46343  
402A -> 437A -0.12591  
405A -> 437A 0.28377  
433A -> 443A -0.13278  
435A -> 449A 0.12495  
396B -> 437B -0.10015  
398B -> 437B 0.27914  
401B -> 437B -0.46341  
402B -> 437B 0.12589  
405B -> 437B -0.28376  
433B -> 443B 0.13277  
435B -> 449B -0.12495

Excited State 153: 1.000-A 3.0947 eV 400.63 nm f=0.0010 <S\*\*2>=0.000

401A -> 437A 0.60205  
402A -> 437A -0.29002  
403A -> 437A 0.11513  
401B -> 437B 0.60205  
402B -> 437B -0.29002  
403B -> 437B 0.11513

Excited State 154: 3.000-A 3.1013 eV 399.78 nm f=0.0000 <S\*\*2>=2.000

393A -> 437A 0.10846  
396A -> 437A 0.11385  
401A -> 437A -0.33094  
402A -> 437A 0.22915  
433A -> 443A -0.26826  
434A -> 443A 0.14372  
435A -> 449A 0.24739

393B -> 437B -0.10847  
396B -> 437B -0.11385  
401B -> 437B 0.33098  
402B -> 437B -0.22916  
433B -> 443B 0.26825  
434B -> 443B -0.14371  
435B -> 449B -0.24739

Excited State 155: 1.000-A 3.1023 eV 399.65 nm f=0.0026 <S\*\*2>=0.000

398A -> 437A 0.64888  
399A -> 437A -0.10696  
400A -> 437A -0.13804  
404A -> 437A 0.12123  
398B -> 437B 0.64891  
399B -> 437B -0.10695  
400B -> 437B -0.13805  
404B -> 437B 0.12122

Excited State 156: 3.000-A 3.1314 eV 395.94 nm f=0.0000 <S\*\*2>=2.000

426A -> 438A 0.58315  
426A -> 439A 0.11771  
427A -> 438A 0.34541  
426B -> 438B -0.58310  
426B -> 439B -0.11770  
427B -> 438B -0.34537

Excited State 157: 1.000-A 3.1341 eV 395.60 nm f=0.1097 <S\*\*2>=0.000

397A -> 437A -0.36046  
405A -> 437A -0.11284  
407A -> 437A 0.10056  
433A -> 443A 0.14881  
435A -> 443A 0.42847  
397B -> 437B -0.36046  
405B -> 437B -0.11285  
407B -> 437B 0.10056  
433B -> 443B 0.14881

435B -> 443B 0.42846

Excited State 158: 1.000-A 3.1434 eV 394.42 nm f=0.0006 <S\*\*2>=0.000

426A -> 438A 0.58001

426A -> 439A 0.11165

427A -> 438A 0.37028

426B -> 438B 0.58006

426B -> 439B 0.11166

427B -> 438B 0.37031

Excited State 159: 3.000-A 3.1493 eV 393.69 nm f=0.0000 <S\*\*2>=2.000

428A -> 440A 0.12343

429A -> 440A 0.63605

432A -> 442A -0.16353

428B -> 440B -0.12341

429B -> 440B -0.63597

432B -> 442B 0.16353

Excited State 160: 1.000-A 3.1556 eV 392.91 nm f=0.0003 <S\*\*2>=0.000

428A -> 440A 0.13146

429A -> 440A 0.68297

428B -> 440B 0.13147

429B -> 440B 0.68303

Excited State 161: 3.000-A 3.1587 eV 392.52 nm f=0.0000 <S\*\*2>=2.000

393A -> 437A 0.14969

396A -> 437A 0.33573

402A -> 437A 0.12766

429A -> 440A 0.14111

431A -> 442A -0.15829

432A -> 441A -0.13857

432A -> 442A 0.28503

435A -> 444A -0.12934

435A -> 449A -0.14458

393B -> 437B -0.14969

396B -> 437B -0.33573

|              |          |
|--------------|----------|
| 402B -> 437B | -0.12766 |
| 429B -> 440B | -0.14115 |
| 431B -> 442B | 0.15829  |
| 432B -> 441B | 0.13857  |
| 432B -> 442B | -0.28503 |
| 435B -> 444B | 0.12933  |
| 435B -> 449B | 0.14458  |

Excited State 162: 3.000-A 3.1624 eV 392.06 nm f=0.0000 <S\*\*2>=2.000

|              |          |
|--------------|----------|
| 396A -> 437A | 0.24774  |
| 429A -> 440A | -0.19788 |
| 431A -> 442A | 0.16810  |
| 432A -> 441A | 0.14269  |
| 432A -> 442A | -0.29616 |
| 434A -> 442A | -0.10726 |
| 435A -> 443A | -0.13141 |
| 435A -> 444A | -0.26527 |
| 435A -> 449A | -0.17543 |
| 396B -> 437B | -0.24774 |
| 429B -> 440B | 0.19790  |
| 431B -> 442B | -0.16810 |
| 432B -> 441B | -0.14269 |
| 432B -> 442B | 0.29616  |
| 434B -> 442B | 0.10726  |
| 435B -> 443B | 0.13141  |
| 435B -> 444B | 0.26523  |
| 435B -> 449B | 0.17542  |

Excited State 163: 3.000-A 3.1666 eV 391.54 nm f=0.0000 <S\*\*2>=2.000

|              |          |
|--------------|----------|
| 390A -> 437A | -0.10558 |
| 393A -> 437A | -0.24986 |
| 396A -> 437A | -0.11122 |
| 398A -> 437A | 0.10713  |
| 432A -> 441A | -0.11644 |
| 432A -> 442A | 0.11853  |
| 433A -> 443A | -0.30385 |

|              |          |
|--------------|----------|
| 433A -> 449A | 0.12914  |
| 434A -> 443A | 0.11432  |
| 434A -> 444A | -0.10428 |
| 435A -> 443A | -0.18947 |
| 435A -> 444A | -0.22605 |
| 435A -> 449A | -0.10232 |
| 390B -> 437B | 0.10558  |
| 393B -> 437B | 0.24986  |
| 396B -> 437B | 0.11121  |
| 398B -> 437B | -0.10713 |
| 432B -> 441B | 0.11644  |
| 432B -> 442B | -0.11853 |
| 433B -> 443B | 0.30386  |
| 433B -> 449B | -0.12914 |
| 434B -> 443B | -0.11432 |
| 434B -> 444B | 0.10428  |
| 435B -> 443B | 0.18948  |
| 435B -> 444B | 0.22601  |
| 435B -> 449B | 0.10232  |

Excited State 164: 1.000-A 3.1824 eV 389.59 nm f=0.0042 <S\*\*2>=0.000

|              |          |
|--------------|----------|
| 435A -> 443A | 0.12909  |
| 435A -> 444A | 0.63445  |
| 436A -> 446A | -0.15891 |
| 436A -> 448A | -0.11916 |
| 435B -> 443B | 0.12909  |
| 435B -> 444B | 0.63435  |
| 436B -> 446B | -0.15891 |
| 436B -> 448B | -0.11916 |

Excited State 165: 3.000-A 3.1901 eV 388.65 nm f=0.0000 <S\*\*2>=2.000

|              |          |
|--------------|----------|
| 390A -> 437A | 0.10299  |
| 393A -> 437A | 0.16600  |
| 396A -> 437A | -0.22966 |
| 435A -> 444A | -0.47991 |
| 435A -> 449A | 0.16759  |

390B -> 437B -0.10299  
393B -> 437B -0.16600  
396B -> 437B 0.22966  
435B -> 444B 0.48006  
435B -> 449B -0.16758

Excited State 166: 1.000-A 3.1989 eV 387.59 nm f=0.0111 <S\*\*2>=0.000

432A -> 441A 0.10142  
432A -> 442A -0.11562  
434A -> 441A 0.15002  
434A -> 442A -0.13665  
435A -> 444A 0.24031  
436A -> 445A 0.22767  
436A -> 446A 0.44893  
436A -> 448A 0.24658  
432B -> 441B 0.10142  
432B -> 442B -0.11562  
434B -> 441B 0.15002  
434B -> 442B -0.13665  
435B -> 444B 0.24036  
436B -> 445B 0.22767  
436B -> 446B 0.44894  
436B -> 448B 0.24658

Excited State 167: 3.000-A 3.2051 eV 386.84 nm f=0.0000 <S\*\*2>=2.000

426A -> 438A -0.26142  
427A -> 438A 0.48213  
427A -> 439A -0.42349  
426B -> 438B 0.26136  
427B -> 438B -0.48204  
427B -> 439B 0.42340

Excited State 168: 1.000-A 3.2074 eV 386.56 nm f=0.0000 <S\*\*2>=0.000

426A -> 438A -0.28969  
427A -> 438A 0.47312  
427A -> 439A -0.42914

426B -> 438B -0.28974  
427B -> 438B 0.47321  
427B -> 439B -0.42923

Excited State 169: 3.000-A 3.2138 eV 385.79 nm f=0.0000 <S\*\*2>=2.000

399A -> 437A -0.23482  
400A -> 437A 0.62113  
399B -> 437B 0.23442  
400B -> 437B -0.62008

Excited State 170: 1.000-A 3.2140 eV 385.76 nm f=0.0004 <S\*\*2>=0.000

399A -> 437A -0.24793  
400A -> 437A 0.63845  
399B -> 437B -0.24831  
400B -> 437B 0.63946

Excited State 171: 3.000-A 3.2183 eV 385.24 nm f=0.0000 <S\*\*2>=2.000

400A -> 437A 0.11954  
429A -> 441A 0.21630  
432A -> 441A -0.33466  
432A -> 442A -0.13938  
433A -> 441A -0.20165  
434A -> 441A -0.36013  
434A -> 442A -0.15343  
400B -> 437B -0.11954  
429B -> 441B -0.21630  
432B -> 441B 0.33467  
432B -> 442B 0.13937  
433B -> 441B 0.20166  
434B -> 441B 0.36015  
434B -> 442B 0.15343

Excited State 172: 1.000-A 3.2299 eV 383.86 nm f=0.0596 <S\*\*2>=0.000

432A -> 441A 0.26610  
434A -> 441A 0.52443  
434A -> 442A -0.14231

436A -> 445A -0.17737  
436A -> 448A -0.12917  
432B -> 441B 0.26608  
434B -> 441B 0.52441  
434B -> 442B -0.14231  
436B -> 445B -0.17736  
436B -> 448B -0.12917

Excited State 173: 3.000-A 3.2345 eV 383.31 nm f=0.0000 <S\*\*2>=2.000

393A -> 437A -0.16356  
396A -> 437A 0.15243  
398A -> 437A 0.14486  
399A -> 437A 0.55040  
400A -> 437A 0.15084  
435A -> 449A 0.11349  
393B -> 437B 0.16356  
396B -> 437B -0.15241  
398B -> 437B -0.14486  
399B -> 437B -0.55035  
400B -> 437B -0.15082  
435B -> 449B -0.11349

Excited State 174: 1.000-A 3.2382 eV 382.88 nm f=0.0018 <S\*\*2>=0.000

398A -> 437A 0.14065  
399A -> 437A 0.63578  
400A -> 437A 0.22184  
398B -> 437B 0.14065  
399B -> 437B 0.63580  
400B -> 437B 0.22184

Excited State 175: 3.000-A 3.2428 eV 382.34 nm f=0.0000 <S\*\*2>=2.000

390A -> 437A -0.13939  
393A -> 437A -0.30227  
394A -> 437A 0.11400  
396A -> 437A 0.20862  
399A -> 437A -0.33011



|              |          |
|--------------|----------|
| 400A -> 437A | -0.19736 |
| 435A -> 444A | -0.10580 |
| 435A -> 449A | 0.16892  |
| 436A -> 445A | -0.12276 |
| 390B -> 437B | 0.13939  |
| 393B -> 437B | 0.30227  |
| 394B -> 437B | -0.11401 |
| 396B -> 437B | -0.20858 |
| 399B -> 437B | 0.33014  |
| 400B -> 437B | 0.19737  |
| 435B -> 444B | 0.10580  |
| 435B -> 449B | -0.16892 |
| 436B -> 445B | 0.12276  |

Excited State 176: 1.000-A 3.2516 eV 381.30 nm f=0.0070 <S\*\*2>=0.000

|              |          |
|--------------|----------|
| 396A -> 437A | 0.60798  |
| 397A -> 437A | 0.16332  |
| 434A -> 442A | -0.16504 |
| 396B -> 437B | 0.60798  |
| 397B -> 437B | 0.16332  |
| 434B -> 442B | -0.16504 |

Excited State 177: 3.000-A 3.2528 eV 381.16 nm f=0.0000 <S\*\*2>=2.000

|              |          |
|--------------|----------|
| 431A -> 448A | 0.10830  |
| 436A -> 443A | -0.10963 |
| 436A -> 445A | 0.39804  |
| 436A -> 446A | 0.15066  |
| 436A -> 450A | -0.11449 |
| 436A -> 455A | -0.18909 |
| 436A -> 458A | 0.10633  |
| 436A -> 467A | 0.11587  |
| 436A -> 472A | 0.10979  |
| 431B -> 448B | -0.10829 |
| 436B -> 443B | 0.10963  |
| 436B -> 445B | -0.39802 |
| 436B -> 446B | -0.15065 |

436B -> 450B 0.11448  
436B -> 455B 0.18909  
436B -> 458B -0.10633  
436B -> 467B -0.11587  
436B -> 472B -0.10979

Excited State 178: 3.000-A 3.2599 eV 380.34 nm f=0.0000 <S\*\*2>=2.000

426A -> 438A -0.23343  
427A -> 438A 0.35767  
427A -> 439A 0.54339  
426B -> 438B 0.23334  
427B -> 438B -0.35756  
427B -> 439B -0.54321

Excited State 179: 1.000-A 3.2614 eV 380.15 nm f=0.0001 <S\*\*2>=0.000

426A -> 438A -0.25378  
427A -> 438A 0.34698  
427A -> 439A 0.55550  
426B -> 438B -0.25386  
427B -> 438B 0.34710  
427B -> 439B 0.55568

Excited State 180: 3.000-A 3.2629 eV 379.98 nm f=0.0000 <S\*\*2>=2.000

428A -> 440A 0.66027  
429A -> 440A -0.13396  
430A -> 440A 0.19409  
428B -> 440B -0.65921  
429B -> 440B 0.13376  
430B -> 440B -0.19380

Excited State 181: 1.000-A 3.2639 eV 379.87 nm f=0.0000 <S\*\*2>=0.000

428A -> 440A 0.66736  
429A -> 440A -0.12537  
430A -> 440A 0.18049  
428B -> 440B 0.66841  
429B -> 440B -0.12558

430B -> 440B 0.18079

Excited State 182: 1.000-A 3.2729 eV 378.82 nm f=0.0097 <S\*\*2>=0.000

396A -> 437A 0.19976

432A -> 441A 0.12304

432A -> 442A 0.23805

434A -> 441A 0.25735

434A -> 442A 0.42720

436A -> 445A 0.20852

436A -> 446A -0.12740

436A -> 448A 0.12987

396B -> 437B 0.19976

432B -> 441B 0.12304

432B -> 442B 0.23805

434B -> 441B 0.25734

434B -> 442B 0.42721

436B -> 445B 0.20859

436B -> 446B -0.12754

436B -> 448B 0.12990

Excited State 183: 3.000-A 3.2734 eV 378.76 nm f=0.0000 <S\*\*2>=2.000

436A -> 445A -0.26892

436A -> 446A 0.57512

436A -> 448A -0.10334

436B -> 445B 0.26887

436B -> 446B -0.57509

436B -> 448B 0.10331

Excited State 184: 3.000-A 3.2846 eV 377.47 nm f=0.0000 <S\*\*2>=2.000

426A -> 439A 0.63543

426B -> 439B -0.63534

Excited State 185: 1.000-A 3.2885 eV 377.02 nm f=0.0239 <S\*\*2>=0.000

426A -> 439A -0.18564

432A -> 442A -0.14421

434A -> 442A -0.21853

436A -> 445A 0.49772  
436A -> 446A -0.33971  
426B -> 439B -0.18567  
432B -> 442B -0.14421  
434B -> 442B -0.21853  
436B -> 445B 0.49771  
436B -> 446B -0.33970

Excited State 186: 1.000-A 3.2909 eV 376.75 nm f=0.0014 <S\*\*2>=0.000

426A -> 439A 0.66507  
427A -> 438A -0.11074  
436A -> 445A 0.15624  
426B -> 439B 0.66514  
427B -> 438B -0.11075  
436B -> 445B 0.15624

Excited State 187: 1.000-A 3.3122 eV 374.32 nm f=0.0448 <S\*\*2>=0.000

433A -> 441A 0.64751  
433A -> 442A 0.11005  
435A -> 441A -0.12677  
433B -> 441B 0.64752  
433B -> 442B 0.11005  
435B -> 441B -0.12677

Excited State 188: 3.000-A 3.3184 eV 373.63 nm f=0.0000 <S\*\*2>=2.000

394A -> 440A -0.14253  
415A -> 440A -0.10888  
429A -> 443A 0.10318  
432A -> 443A -0.23867  
432A -> 444A -0.18566  
432A -> 448A -0.12582  
434A -> 443A -0.11047  
436A -> 445A 0.31536  
436A -> 447A -0.12791  
436A -> 448A -0.10683  
436A -> 455A 0.10435

|              |          |
|--------------|----------|
| 394B -> 440B | 0.14253  |
| 415B -> 440B | 0.10888  |
| 429B -> 443B | -0.10318 |
| 432B -> 443B | 0.23867  |
| 432B -> 444B | 0.18566  |
| 432B -> 448B | 0.12582  |
| 434B -> 443B | 0.11047  |
| 436B -> 445B | -0.31535 |
| 436B -> 447B | 0.12791  |
| 436B -> 448B | 0.10683  |
| 436B -> 455B | -0.10435 |

Excited State 189: 3.000-A 3.3242 eV 372.97 nm f=0.0000 <S\*\*2>=2.000

|              |          |
|--------------|----------|
| 381A -> 439A | 0.10779  |
| 385A -> 438A | -0.10357 |
| 386A -> 438A | -0.22761 |
| 388A -> 439A | 0.24985  |
| 399A -> 438A | -0.21033 |
| 400A -> 439A | 0.19811  |
| 403A -> 438A | 0.16595  |
| 404A -> 439A | -0.10871 |
| 405A -> 439A | 0.10536  |
| 406A -> 439A | 0.13136  |
| 381B -> 439B | -0.10779 |
| 385B -> 438B | 0.10357  |
| 386B -> 438B | 0.22761  |
| 388B -> 439B | -0.24985 |
| 399B -> 438B | 0.21033  |
| 400B -> 439B | -0.19811 |
| 403B -> 438B | -0.16595 |
| 404B -> 439B | 0.10871  |
| 405B -> 439B | -0.10536 |
| 406B -> 439B | -0.13136 |

Excited State 190: 3.000-A 3.3254 eV 372.84 nm f=0.0000 <S\*\*2>=2.000

|              |         |
|--------------|---------|
| 388A -> 439A | 0.11186 |
|--------------|---------|

|              |          |
|--------------|----------|
| 393A -> 440A | 0.12206  |
| 394A -> 440A | 0.29240  |
| 395A -> 451A | 0.10943  |
| 400A -> 439A | 0.11212  |
| 409A -> 440A | 0.10142  |
| 413A -> 440A | 0.10918  |
| 415A -> 440A | 0.22776  |
| 417A -> 440A | 0.11465  |
| 426A -> 439A | -0.13714 |
| 427A -> 440A | 0.12243  |
| 436A -> 445A | 0.10548  |
| 388B -> 439B | -0.11186 |
| 393B -> 440B | -0.12206 |
| 394B -> 440B | -0.29240 |
| 395B -> 451B | -0.10943 |
| 400B -> 439B | -0.11212 |
| 409B -> 440B | -0.10142 |
| 413B -> 440B | -0.10918 |
| 415B -> 440B | -0.22776 |
| 417B -> 440B | -0.11465 |
| 426B -> 439B | 0.13715  |
| 427B -> 440B | -0.12243 |
| 436B -> 445B | -0.10547 |

Excited State 191: 1.000-A 3.3257 eV 372.81 nm f=0.0139 <S\*\*2>=0.000

|              |          |
|--------------|----------|
| 432A -> 442A | -0.11479 |
| 436A -> 445A | -0.23174 |
| 436A -> 446A | -0.27221 |
| 436A -> 447A | 0.15399  |
| 436A -> 448A | 0.48756  |
| 436A -> 450A | -0.13539 |
| 432B -> 442B | -0.11479 |
| 436B -> 445B | -0.23175 |
| 436B -> 446B | -0.27221 |
| 436B -> 447B | 0.15399  |
| 436B -> 448B | 0.48757  |

436B -> 450B -0.13538

Excited State 192: 3.000-A 3.3259 eV 372.79 nm f=0.0000 <S\*\*2>=2.000

386A -> 438A 0.13978

386A -> 439A 0.11628

388A -> 438A -0.14245

388A -> 439A 0.12238

394A -> 440A -0.18007

399A -> 438A 0.15132

400A -> 439A 0.13224

401A -> 438A -0.10006

403A -> 438A -0.15123

415A -> 440A -0.14137

426A -> 439A -0.20026

386B -> 438B -0.13978

386B -> 439B -0.11628

388B -> 438B 0.14245

388B -> 439B -0.12238

394B -> 440B 0.18007

399B -> 438B -0.15132

400B -> 439B -0.13224

401B -> 438B 0.10006

403B -> 438B 0.15123

415B -> 440B 0.14137

426B -> 439B 0.20027

Excited State 193: 3.000-A 3.3354 eV 371.73 nm f=0.0000 <S\*\*2>=2.000

429A -> 443A 0.13306

432A -> 443A -0.20185

433A -> 441A -0.14906

434A -> 443A -0.13815

435A -> 449A 0.10244

436A -> 445A -0.30003

436A -> 447A 0.13178

436A -> 455A -0.18534

436A -> 467A 0.11492

429B -> 443B -0.13306  
432B -> 443B 0.20185  
433B -> 441B 0.14905  
434B -> 443B 0.13815  
435B -> 449B -0.10244  
436B -> 445B 0.30003  
436B -> 447B -0.13178  
436B -> 455B 0.18534  
436B -> 467B -0.11492

Excited State 194: 3.000-A 3.3506 eV 370.04 nm f=0.0000 <S\*\*2>=2.000

428A -> 443A -0.11211  
429A -> 443A -0.23868  
431A -> 442A -0.10568  
432A -> 441A 0.10931  
432A -> 444A -0.30843  
433A -> 441A -0.17750  
434A -> 441A -0.15478  
434A -> 444A -0.11317  
435A -> 452A -0.18745  
428B -> 443B 0.11211  
429B -> 443B 0.23868  
431B -> 442B 0.10568  
432B -> 441B -0.10931  
432B -> 444B 0.30843  
433B -> 441B 0.17750  
434B -> 441B 0.15478  
434B -> 444B 0.11317  
435B -> 452B 0.18745

Excited State 195: 3.000-A 3.3585 eV 369.17 nm f=0.0000 <S\*\*2>=2.000

429A -> 441A 0.19716  
429A -> 442A 0.13326  
430A -> 441A -0.19394  
432A -> 441A -0.15729  
432A -> 442A -0.12528



432A -> 444A -0.28445  
 433A -> 441A 0.26617  
 434A -> 441A 0.20601  
 429B -> 441B -0.19716  
 429B -> 442B -0.13326  
 430B -> 441B 0.19394  
 432B -> 441B 0.15729  
 432B -> 442B 0.12528  
 432B -> 444B 0.28445  
 433B -> 441B -0.26617  
 434B -> 441B -0.20601

Excited State 196: 3.000-A 3.3718 eV 367.71 nm f=0.0000 <S\*\*2>=2.000

429A -> 441A 0.15844  
 430A -> 442A -0.35704  
 431A -> 441A 0.10744  
 431A -> 442A -0.17581  
 433A -> 442A 0.27669  
 434A -> 442A 0.21913  
 429B -> 441B -0.15845  
 430B -> 442B 0.35704  
 431B -> 441B -0.10744  
 431B -> 442B 0.17581  
 433B -> 442B -0.27669  
 434B -> 442B -0.21913

Excited State 197: 1.000-A 3.3848 eV 366.30 nm f=0.0129 <S\*\*2>=0.000

432A -> 441A 0.44318  
 432A -> 442A -0.17443  
 433A -> 441A -0.10288  
 433A -> 442A 0.24101  
 434A -> 441A -0.24575  
 435A -> 445A -0.18883  
 436A -> 450A 0.18765  
 432B -> 441B 0.44318  
 432B -> 442B -0.17444

433B -> 441B -0.10286  
433B -> 442B 0.24102  
434B -> 441B -0.24576  
435B -> 445B -0.18882  
436B -> 450B 0.18764

Excited State 198: 3.000-A 3.3872 eV 366.03 nm f=0.0000 <S\*\*2>=2.000

428A -> 441A 0.19905  
428A -> 442A 0.10999  
429A -> 441A 0.20192  
430A -> 441A 0.15795  
432A -> 441A -0.16933  
433A -> 441A -0.24192  
434A -> 441A 0.34499  
428B -> 441B -0.19905  
428B -> 442B -0.10999  
429B -> 441B -0.20192  
430B -> 441B -0.15795  
432B -> 441B 0.16932  
433B -> 441B 0.24192  
434B -> 441B -0.34498

Excited State 199: 1.000-A 3.4051 eV 364.12 nm f=0.0197 <S\*\*2>=0.000

432A -> 441A 0.13812  
432A -> 442A -0.12684  
433A -> 442A 0.14235  
435A -> 445A 0.53683  
435A -> 447A 0.19861  
436A -> 445A -0.10982  
436A -> 447A 0.13074  
436A -> 450A 0.10958  
432B -> 441B 0.13813  
432B -> 442B -0.12683  
433B -> 442B 0.14235  
435B -> 445B 0.53678  
435B -> 447B 0.19861

436B -> 445B -0.10981  
 436B -> 447B 0.13074  
 436B -> 450B 0.10960

Excited State 200: 3.000-A 3.4130 eV 363.27 nm f=0.0000 <S\*\*2>=2.000

430A -> 442A 0.16319  
 431A -> 448A -0.10204  
 432A -> 448A -0.10510  
 433A -> 441A -0.18311  
 434A -> 448A 0.13026  
 435A -> 445A -0.15712  
 435A -> 452A 0.12577  
 436A -> 448A -0.27951  
 436A -> 450A 0.15681  
 436A -> 455A -0.12187  
 436A -> 467A 0.10385  
 430B -> 442B -0.16319  
 431B -> 448B 0.10204  
 432B -> 448B 0.10510  
 433B -> 441B 0.18312  
 434B -> 448B -0.13026  
 435B -> 445B 0.15719  
 435B -> 452B -0.12577  
 436B -> 448B 0.27951  
 436B -> 450B -0.15680  
 436B -> 455B 0.12186  
 436B -> 467B -0.10385

**Table S9.** Standard orientation of the optimized geometry for the open-ring isomer (OF2) of **[Ir( $\mu$ -Cl)(PIC)<sub>2</sub>]<sub>2</sub>**.

| Symbol | Coordinates |          |          | C | -5.36079 | -1.44221 | -1.66196 |
|--------|-------------|----------|----------|---|----------|----------|----------|
|        | X           | Y        | Z        |   |          |          |          |
| Ir     | -0.18024    | -2.14154 | -0.21421 | C | -5.79125 | -2.34473 | -0.47736 |
| N      | -4.46048    | -2.55754 | 0.14895  | C | -6.74106 | -1.60105 | 0.436099 |
| C      | -3.41173    | -1.94397 | -0.51338 | C | -8.02737 | -1.95941 | 0.589833 |
| C      | -3.9597     | -1.22071 | -1.65747 | C | -8.588   | -3.16357 | -0.05481 |
|        |             |          |          | C | -7.65047 | -3.9928  | -0.83741 |
|        |             |          |          | C | -6.36323 | -3.64517 | -1.00486 |

|   |          |          |          |    |          |          |          |
|---|----------|----------|----------|----|----------|----------|----------|
| O | -9.79383 | -3.47519 | 0.072178 | C  | -5.80018 | 5.106876 | -3.76753 |
| C | -3.3761  | -0.46763 | -2.68178 | C  | -5.66044 | 6.485595 | -3.57183 |
| C | -4.20336 | 0.058606 | -3.68426 | C  | -4.7797  | 6.964553 | -2.59418 |
| C | -5.58839 | -0.1589  | -3.67762 | C  | -4.04893 | 6.06877  | -1.80906 |
| C | -6.17903 | -0.91927 | -2.65482 | Cl | -0.23367 | 0.150683 | -1.64771 |
| C | -3.96517 | -3.40561 | 1.136753 | Cl | -0.07315 | -0.1901  | 1.645214 |
| C | -2.58365 | -3.27231 | 1.05803  | Ir | 0.199534 | 2.054527 | 0.196971 |
| N | -2.25309 | -2.34826 | 0.035624 | N  | 4.078316 | -2.50568 | -0.44468 |
| C | -4.83165 | -4.2572  | 1.979145 | C  | 2.980302 | -2.11671 | 0.300106 |
| C | -1.46792 | -3.96515 | 1.676591 | C  | 3.402731 | -1.93055 | 1.685458 |
| C | -1.59301 | -4.89171 | 2.72688  | C  | 4.78661  | -2.22455 | 1.741956 |
| C | -0.48035 | -5.61383 | 3.159835 | C  | 5.350333 | -2.54587 | 0.335962 |
| C | 0.753347 | -5.42082 | 2.52689  | C  | 5.972867 | -3.92338 | 0.300919 |
| C | 0.885903 | -4.47753 | 1.500448 | C  | 7.285289 | -4.12063 | 0.090191 |
| C | -0.20379 | -3.69481 | 1.075824 | C  | 8.20734  | -3.00445 | -0.20033 |
| C | -5.65377 | -3.69254 | 2.972049 | C  | 7.616381 | -1.65444 | -0.26242 |
| C | -6.48546 | -4.50437 | 3.74991  | C  | 6.305202 | -1.43542 | -0.05818 |
| C | -6.50106 | -5.8897  | 3.551965 | O  | 9.430346 | -3.19758 | -0.39113 |
| C | -5.67882 | -6.46251 | 2.573772 | C  | 2.70784  | -1.64486 | 2.865197 |
| C | -4.85159 | -5.65319 | 1.790518 | C  | 3.412547 | -1.64436 | 4.075935 |
| N | -4.00137 | 2.946959 | -0.16512 | C  | 4.783746 | -1.92858 | 4.121661 |
| C | -3.02761 | 2.216077 | 0.491191 | C  | 5.485258 | -2.2202  | 2.941743 |
| C | -3.65346 | 1.545001 | 1.627767 | C  | 3.65767  | -3.00433 | -1.68133 |
| C | -5.02099 | 1.92041  | 1.634309 | C  | 2.271775 | -2.86508 | -1.66809 |
| C | -5.34998 | 2.87072  | 0.455139 | N  | 1.873537 | -2.28671 | -0.44094 |
| C | -5.78684 | 4.220852 | 0.98633  | C  | 4.57849  | -3.6249  | -2.65358 |
| C | -7.03007 | 4.700543 | 0.813554 | C  | 1.178637 | -3.30738 | -2.52212 |
| C | -8.04385 | 3.976381 | 0.021098 | C  | 1.331228 | -3.82991 | -3.81791 |
| C | -7.60692 | 2.724084 | -0.62709 | C  | 0.224741 | -4.32827 | -4.50899 |
| C | -6.3655  | 2.233793 | -0.46841 | C  | -1.03565 | -4.31261 | -3.89988 |
| O | -9.2098  | 4.41254  | -0.11029 | C  | -1.19816 | -3.76552 | -2.62028 |
| C | -3.15858 | 0.71644  | 2.639935 | C  | -0.11165 | -3.22122 | -1.91484 |
| C | -4.03974 | 0.274479 | 3.636962 | C  | 5.651825 | -2.90308 | -3.20874 |
| C | -5.39077 | 0.648528 | 3.635821 | C  | 6.540142 | -3.52179 | -4.094   |
| C | -5.89273 | 1.481418 | 2.622198 | C  | 6.364552 | -4.8647  | -4.44635 |
| C | -3.4189  | 3.737601 | -1.15262 | C  | 5.293774 | -5.58899 | -3.90773 |
| C | -2.06144 | 3.450498 | -1.07863 | C  | 4.410166 | -4.97731 | -3.01495 |
| N | -1.83325 | 2.494998 | -0.05882 | N  | 4.563354 | 1.764254 | 0.840705 |
| C | -4.18596 | 4.679142 | -1.99541 | C  | 3.514047 | 1.671762 | -0.07168 |
| C | -0.87801 | 3.993222 | -1.71747 | C  | 3.834066 | 1.430083 | -1.45388 |
| C | -0.8969  | 4.912293 | -2.78148 | C  | 2.938454 | 0.777933 | -2.33135 |
| C | 0.297138 | 5.452446 | -3.25996 | C  | 3.340139 | 0.362647 | -3.58919 |
| C | 1.51028  | 5.080454 | -2.66728 | C  | 4.665149 | 0.586588 | -4.02625 |
| C | 1.530739 | 4.148548 | -1.62348 | C  | 5.554088 | 1.264065 | -3.21046 |
| C | 0.350098 | 3.5598   | -1.14205 | C  | 4.051867 | 2.234765 | 1.990602 |
| C | -5.06547 | 4.207908 | -2.98796 | C  | 2.62114  | 2.383985 | 1.822468 |

|   |          |          |          |   |          |          |          |
|---|----------|----------|----------|---|----------|----------|----------|
| N | 2.299158 | 1.953665 | 0.541675 | H | -4.66495 | 8.032671 | -2.44107 |
| C | 4.940065 | 2.517135 | 3.131332 | H | -3.36415 | 6.438371 | -1.05276 |
| C | 1.561981 | 2.951025 | 2.597745 | H | 5.297214 | -4.75038 | 0.498014 |
| C | 1.666899 | 3.391853 | 3.940089 | H | 7.722793 | -5.11289 | 0.103665 |
| C | 0.616779 | 4.078696 | 4.530635 | H | 8.299915 | -0.84143 | -0.48308 |
| C | -0.54994 | 4.349404 | 3.786322 | H | 5.879058 | -0.43625 | -0.0792  |
| C | -0.69014 | 3.872563 | 2.484024 | H | 1.652437 | -1.41957 | 2.838757 |
| C | 0.329979 | 3.114322 | 1.87092  | H | 2.879501 | -1.42341 | 4.994401 |
| C | 5.936577 | 1.584482 | 3.479209 | H | 5.30645  | -1.92764 | 5.072184 |
| C | 6.840813 | 1.85919  | 4.507153 | H | 6.544715 | -2.45365 | 2.968327 |
| C | 6.778288 | 3.076663 | 5.196405 | H | 2.30956  | -3.8518  | -4.28458 |
| C | 5.808487 | 4.021714 | 4.842845 | H | 0.346769 | -4.73134 | -5.50944 |
| C | 4.898194 | 3.747094 | 3.818223 | H | -1.89649 | -4.71788 | -4.42495 |
| H | -6.32787 | -0.72929 | 0.93335  | H | -2.18709 | -3.75203 | -2.17728 |
| H | -8.70756 | -1.39037 | 1.214485 | H | 5.78326  | -1.85876 | -2.95161 |
| H | -8.05436 | -4.90717 | -1.25803 | H | 7.366804 | -2.95471 | -4.50987 |
| H | -5.67434 | -4.26187 | -1.57455 | H | 7.055113 | -5.34258 | -5.13369 |
| H | -2.31052 | -0.28741 | -2.69191 | H | 5.151919 | -6.6312  | -4.17521 |
| H | -3.75358 | 0.636971 | -4.48439 | H | 3.585361 | -5.54124 | -2.5922  |
| H | -6.20676 | 0.246793 | -4.47154 | H | 1.940913 | 0.548621 | -1.99269 |
| H | -7.24755 | -1.10958 | -2.65113 | H | 2.635756 | -0.16383 | -4.22376 |
| H | -2.55518 | -5.05445 | 3.198656 | H | 4.976736 | 0.255418 | -5.01143 |
| H | -0.57763 | -6.32823 | 3.971163 | H | 6.542883 | 1.507743 | -3.58245 |
| H | 1.618504 | -6.00041 | 2.837295 | H | 2.563457 | 3.184048 | 4.509141 |
| H | 1.854959 | -4.35273 | 1.035008 | H | 0.695513 | 4.412941 | 5.559853 |
| H | -5.62912 | -2.62051 | 3.136676 | H | -1.35545 | 4.919681 | 4.240621 |
| H | -7.11608 | -4.05732 | 4.511643 | H | -1.60785 | 4.071426 | 1.944856 |
| H | -7.14651 | -6.51842 | 4.156668 | H | 5.989097 | 0.648363 | 2.93727  |
| H | -5.68466 | -7.5365  | 2.418609 | H | 7.598289 | 1.126365 | 4.767162 |
| H | -4.21151 | -6.09579 | 1.034374 | H | 7.485435 | 3.291727 | 5.991085 |
| H | -5.04183 | 4.760274 | 1.563791 | H | 5.770052 | 4.97922  | 5.352376 |
| H | -7.3401  | 5.649577 | 1.237064 | H | 4.174606 | 4.500509 | 3.527689 |
| H | -8.33753 | 2.231135 | -1.25935 | C | 5.153828 | 1.772708 | -1.941   |
| H | -6.04194 | 1.326758 | -0.96868 | C | 6.033238 | 2.71129  | -1.27677 |
| H | -2.12089 | 0.41288  | 2.641667 | C | 7.462491 | 2.5441   | -1.35873 |
| H | -3.65939 | -0.36483 | 4.426532 | C | 5.543588 | 3.921068 | -0.66283 |
| H | -6.0507  | 0.305942 | 4.42607  | C | 8.323215 | 3.454189 | -0.81532 |
| H | -6.93337 | 1.789856 | 2.621707 | H | 7.851339 | 1.638741 | -1.81348 |
| H | -1.83771 | 5.206048 | -3.23204 | C | 6.3899   | 4.863791 | -0.15656 |
| H | 0.281526 | 6.161074 | -4.08182 | H | 4.475463 | 4.09831  | -0.65162 |
| H | 2.442667 | 5.510233 | -3.02232 | H | 9.397056 | 3.302986 | -0.82841 |
| H | 2.479838 | 3.864618 | -1.1928  | H | 6.018846 | 5.789849 | 0.267493 |
| H | -5.16083 | 3.139772 | -3.15173 | C | 7.836991 | 4.681008 | -0.18006 |
| H | -6.47611 | 4.732127 | -4.52931 | O | 8.637209 | 5.538298 | 0.299855 |
| H | -6.23081 | 7.181602 | -4.17825 |   |          |          |          |

Excited State 1: 3.000-A -0.5783 eV -2143.95 nm f=-0.0000 <S\*\*2>=2.000

|              |          |
|--------------|----------|
| 433A -> 438A | 0.19938  |
| 434A -> 437A | 0.27187  |
| 435A -> 438A | -0.43687 |
| 436A -> 437A | -0.43060 |
| 433B -> 438B | -0.19939 |
| 434B -> 437B | -0.27187 |
| 435B -> 438B | 0.43687  |
| 436B -> 437B | 0.43060  |

This state for optimization and/or second-order correction.

Total Energy, E(TD-HF/TD-DFT) = -6023.98464200

Copying the excited state density for this state as the 1-particle RhoCI density.

Excited State 2: 3.000-A -0.5761 eV -2152.23 nm f=-0.0000 <S\*\*2>=2.000

|              |          |
|--------------|----------|
| 433A -> 437A | 0.20952  |
| 434A -> 438A | 0.25777  |
| 435A -> 437A | -0.46285 |
| 436A -> 438A | -0.40662 |
| 433B -> 437B | -0.20952 |
| 434B -> 438B | -0.25777 |
| 435B -> 437B | 0.46286  |
| 436B -> 438B | 0.40662  |

Excited State 3: 3.000-A 0.6694 eV 1852.18 nm f=0.0000 <S\*\*2>=2.000

|              |          |
|--------------|----------|
| 433A -> 438A | -0.21407 |
| 434A -> 437A | -0.23492 |
| 435A -> 438A | 0.28790  |
| 436A -> 437A | -0.55651 |
| 433B -> 438B | 0.21408  |
| 434B -> 437B | 0.23493  |
| 435B -> 438B | -0.28796 |
| 436B -> 437B | 0.55664  |

Excited State 4: 3.000-A 0.6835 eV 1814.05 nm f=0.0000 <S\*\*2>=2.000

|              |          |
|--------------|----------|
| 433A -> 437A | -0.19517 |
| 434A -> 438A | -0.16271 |

435A -> 437A 0.31452  
436A -> 438A -0.57462  
433B -> 437B 0.19517  
434B -> 438B 0.16270  
435B -> 437B -0.31462  
436B -> 438B 0.57473

Excited State 5: 1.000-A 0.6979 eV 1776.52 nm f=0.0046 <S\*\*2>=0.000

435A -> 438A -0.36422  
436A -> 437A 0.60432  
435B -> 438B -0.36417  
436B -> 437B 0.60421

Excited State 6: 1.000-A 0.7042 eV 1760.65 nm f=0.0000 <S\*\*2>=0.000

435A -> 437A 0.51104  
436A -> 438A -0.48738  
435B -> 437B 0.51099  
436B -> 438B -0.48726

Excited State 7: 3.000-A 0.7633 eV 1624.27 nm f=0.0000 <S\*\*2>=2.000

433A -> 437A 0.36458  
434A -> 438A 0.40706  
435A -> 437A 0.43102  
433B -> 437B -0.36460  
434B -> 438B -0.40707  
435B -> 437B -0.43102

Excited State 8: 3.000-A 0.7691 eV 1612.05 nm f=0.0000 <S\*\*2>=2.000

433A -> 438A -0.28822  
434A -> 437A -0.41955  
435A -> 438A -0.47231  
433B -> 438B 0.28824  
434B -> 437B 0.41957  
435B -> 438B 0.47234

Excited State 9: 1.000-A 0.8626 eV 1437.30 nm f=0.0009 <S\*\*2>=0.000

|              |         |
|--------------|---------|
| 433A -> 438A | 0.16666 |
| 434A -> 437A | 0.35270 |
| 435A -> 438A | 0.52432 |
| 436A -> 437A | 0.28918 |
| 433B -> 438B | 0.16663 |
| 434B -> 437B | 0.35267 |
| 435B -> 438B | 0.52429 |
| 436B -> 437B | 0.28918 |

Excited State 10: 1.000-A 0.9084 eV 1364.85 nm f=0.1380 <S\*\*2>=0.000

|              |          |
|--------------|----------|
| 433A -> 437A | 0.25119  |
| 434A -> 438A | 0.30392  |
| 435A -> 437A | 0.41179  |
| 436A -> 438A | 0.43721  |
| 433B -> 437B | 0.25117  |
| 434B -> 438B | 0.30390  |
| 435B -> 437B | 0.41178  |
| 436B -> 438B | 0.43721  |
| 435A <- 437A | -0.10368 |
| 436A <- 438A | -0.10316 |
| 435B <- 437B | -0.10368 |
| 436B <- 438B | -0.10316 |

Excited State 11: 3.000-A 1.0815 eV 1146.42 nm f=0.0000 <S\*\*2>=2.000

|              |          |
|--------------|----------|
| 429A -> 438A | 0.23006  |
| 430A -> 438A | 0.22808  |
| 432A -> 437A | -0.60681 |
| 429B -> 438B | -0.23008 |
| 430B -> 438B | -0.22810 |
| 432B -> 437B | 0.60686  |

Excited State 12: 3.000-A 1.1002 eV 1126.89 nm f=0.0000 <S\*\*2>=2.000

|              |          |
|--------------|----------|
| 429A -> 437A | 0.26217  |
| 430A -> 437A | 0.27290  |
| 432A -> 438A | -0.57563 |
| 429B -> 437B | -0.26219 |



430B -> 437B -0.27292  
432B -> 438B 0.57567

Excited State 13: 3.000-A 1.1388 eV 1088.74 nm f=0.0000 <S\*\*2>=2.000  
433A -> 437A -0.51765  
434A -> 438A 0.47019  
433B -> 437B 0.52199  
434B -> 438B -0.47331

Excited State 14: 1.000-A 1.1395 eV 1088.04 nm f=0.0000 <S\*\*2>=0.000  
433A -> 437A 0.57194  
434A -> 438A -0.41145  
433B -> 437B 0.56798  
434B -> 438B -0.40786

Excited State 15: 1.000-A 1.1466 eV 1081.28 nm f=0.0103 <S\*\*2>=0.000  
432A -> 437A -0.29340  
433A -> 438A -0.33680  
434A -> 437A 0.49437  
435A -> 438A -0.18372  
436A -> 437A -0.11846  
432B -> 437B -0.29288  
433B -> 438B -0.34354  
434B -> 437B 0.49941  
435B -> 438B -0.18397  
436B -> 437B -0.11812

Excited State 16: 3.000-A 1.1470 eV 1080.95 nm f=0.0000 <S\*\*2>=2.000  
433A -> 438A 0.56148  
434A -> 437A -0.42164  
433B -> 438B -0.55743  
434B -> 437B 0.41565

Excited State 17: 1.000-A 1.1785 eV 1052.04 nm f=0.0059 <S\*\*2>=0.000  
429A -> 438A -0.11855  
430A -> 438A -0.16921

432A -> 437A 0.47729  
433A -> 438A -0.46124  
429B -> 438B -0.11853  
430B -> 438B -0.16918  
432B -> 437B 0.47724  
433B -> 438B -0.46118

Excited State 18: 1.000-A 1.1994 eV 1033.76 nm f=0.0487 <S\*\*2>=0.000

429A -> 437A -0.18147  
430A -> 437A -0.20765  
432A -> 438A 0.51042  
433A -> 437A -0.15121  
434A -> 438A -0.28468  
435A -> 437A 0.18459  
436A -> 438A 0.18287  
429B -> 437B -0.18145  
430B -> 437B -0.20763  
432B -> 438B 0.51038  
433B -> 437B -0.15121  
434B -> 438B -0.28468  
435B -> 437B 0.18459  
436B -> 438B 0.18287

Excited State 19: 3.000-A 1.2048 eV 1029.06 nm f=0.0000 <S\*\*2>=2.000

424A -> 437A -0.19333  
424A -> 438A 0.15532  
425A -> 437A -0.47020  
425A -> 438A 0.44083  
424B -> 437B 0.19259  
424B -> 438B -0.15464  
425B -> 437B 0.47048  
425B -> 438B -0.44109

Excited State 20: 3.000-A 1.2054 eV 1028.53 nm f=0.0000 <S\*\*2>=2.000

424A -> 437A -0.46959  
424A -> 438A -0.44293

|              |          |
|--------------|----------|
| 425A -> 437A | 0.19066  |
| 425A -> 438A | 0.15415  |
| 424B -> 437B | 0.46988  |
| 424B -> 438B | 0.44313  |
| 425B -> 437B | -0.18992 |
| 425B -> 438B | -0.15344 |

Excited State 21: 1.000-A 1.3876 eV 893.54 nm f=0.0789 <S\*\*2>=0.000

|              |          |
|--------------|----------|
| 431A -> 437A | -0.11303 |
| 432A -> 437A | 0.38407  |
| 433A -> 438A | 0.35179  |
| 434A -> 437A | 0.34444  |
| 435A -> 438A | -0.24758 |
| 436A -> 437A | -0.20939 |
| 431B -> 437B | -0.11304 |
| 432B -> 437B | 0.38407  |
| 433B -> 438B | 0.35179  |
| 434B -> 437B | 0.34445  |
| 435B -> 438B | -0.24758 |
| 436B -> 437B | -0.20938 |
| 435A <- 438A | 0.11796  |
| 436A <- 437A | 0.11123  |
| 435B <- 438B | 0.11796  |
| 436B <- 437B | 0.11123  |

Excited State 22: 1.000-A 1.4012 eV 884.86 nm f=0.1240 <S\*\*2>=0.000

|              |          |
|--------------|----------|
| 430A -> 437A | -0.10267 |
| 432A -> 438A | 0.40712  |
| 433A -> 437A | 0.27676  |
| 434A -> 438A | 0.38059  |
| 435A -> 437A | -0.22536 |
| 436A -> 438A | -0.21943 |
| 430B -> 437B | -0.10267 |
| 432B -> 438B | 0.40712  |
| 433B -> 437B | 0.27676  |
| 434B -> 438B | 0.38060  |

435B -> 437B -0.22536  
436B -> 438B -0.21943  
435A <- 437A 0.11966  
436A <- 438A 0.10667  
435B <- 437B 0.11966  
436B <- 438B 0.10667

Excited State 23: 3.000-A 1.4439 eV 858.68 nm f=0.0000 <S\*\*2>=2.000

428A -> 437A 0.10496  
430A -> 437A -0.55713  
431A -> 438A -0.27619  
432A -> 438A -0.26534  
433A -> 437A 0.10518  
428B -> 437B -0.10498  
430B -> 437B 0.55724  
431B -> 438B 0.27622  
432B -> 438B 0.26539  
433B -> 437B -0.10519

Excited State 24: 3.000-A 1.4535 eV 853.00 nm f=0.0000 <S\*\*2>=2.000

430A -> 438A -0.46015  
431A -> 437A -0.46480  
432A -> 437A -0.15951  
433A -> 438A 0.12134  
430B -> 438B 0.46023  
431B -> 437B 0.46486  
432B -> 437B 0.15954  
433B -> 438B -0.12134

Excited State 25: 1.000-A 1.4763 eV 839.80 nm f=0.0009 <S\*\*2>=0.000

429A -> 437A 0.12019  
430A -> 437A 0.60599  
431A -> 438A 0.17866  
432A -> 438A 0.26013  
429B -> 437B 0.12022  
430B -> 437B 0.60589

431B -> 438B 0.17859  
432B -> 438B 0.26010

Excited State 26: 1.000-A 1.4954 eV 829.10 nm f=0.0000 <S\*\*2>=0.000

430A -> 438A 0.52372  
431A -> 437A 0.42272  
432A -> 437A 0.17641  
430B -> 438B 0.52371  
431B -> 437B 0.42259  
432B -> 437B 0.17645

Excited State 27: 3.000-A 1.5013 eV 825.83 nm f=0.0000 <S\*\*2>=2.000

429A -> 438A -0.41517  
430A -> 438A -0.28920  
431A -> 437A 0.35499  
432A -> 437A -0.29905  
429B -> 438B 0.41518  
430B -> 438B 0.28912  
431B -> 437B -0.35511  
432B -> 437B 0.29901

Excited State 28: 3.000-A 1.5029 eV 824.99 nm f=0.0000 <S\*\*2>=2.000

429A -> 437A -0.50950  
431A -> 438A 0.35625  
432A -> 438A -0.29316  
429B -> 437B 0.50953  
431B -> 438B -0.35629  
432B -> 438B 0.29314

Excited State 29: 1.000-A 1.5625 eV 793.48 nm f=0.0077 <S\*\*2>=0.000

424A -> 437A 0.18199  
425A -> 438A -0.16724  
428A -> 438A 0.11512  
429A -> 438A -0.29293  
430A -> 438A -0.29150  
431A -> 437A 0.46023

424B -> 437B 0.18186  
425B -> 438B -0.16714  
428B -> 438B 0.11513  
429B -> 438B -0.29289  
430B -> 438B -0.29149  
431B -> 437B 0.46021

Excited State 30: 1.000-A 1.5691 eV 790.16 nm f=0.0092 <S\*\*2>=0.000

424A -> 437A -0.12111  
424A -> 438A -0.24328  
425A -> 437A 0.26868  
425A -> 438A -0.10852  
429A -> 437A 0.44031  
431A -> 438A -0.36203  
424B -> 437B -0.12154  
424B -> 438B -0.24311  
425B -> 437B 0.26849  
425B -> 438B -0.10891  
429B -> 437B 0.44027  
431B -> 438B -0.36199

Excited State 31: 1.000-A 1.5880 eV 780.74 nm f=0.0056 <S\*\*2>=0.000

424A -> 437A 0.42410  
424A -> 438A 0.15658  
425A -> 437A 0.21630  
425A -> 438A -0.39521  
430A -> 438A 0.13192  
431A -> 437A -0.20582  
424B -> 437B 0.42378  
424B -> 438B 0.15719  
425B -> 437B 0.21694  
425B -> 438B -0.39498  
430B -> 438B 0.13192  
431B -> 437B -0.20584

Excited State 32: 1.659-A 1.5923 eV 778.66 nm f=0.0147 <S\*\*2>=0.438

|              |          |
|--------------|----------|
| 424A -> 437A | -0.17432 |
| 424A -> 438A | -0.31282 |
| 425A -> 437A | 0.32871  |
| 425A -> 438A | -0.11624 |
| 427A -> 438A | -0.11459 |
| 428A -> 437A | -0.19772 |
| 429A -> 437A | -0.32233 |
| 424B -> 437B | -0.17663 |
| 424B -> 438B | -0.31752 |
| 425B -> 437B | 0.33255  |
| 425B -> 438B | -0.11898 |
| 427B -> 438B | 0.14157  |
| 428B -> 437B | 0.29792  |
| 429B -> 437B | -0.13987 |
| 431B -> 438B | 0.38667  |

Excited State 33: 2.692-A 1.5923 eV 778.66 nm f=0.0041 <S\*\*2>=1.562

|              |          |
|--------------|----------|
| 424A -> 438A | -0.17162 |
| 425A -> 437A | 0.17908  |
| 427A -> 438A | 0.24892  |
| 428A -> 437A | 0.49432  |
| 431A -> 438A | 0.40088  |
| 424B -> 438B | -0.16233 |
| 425B -> 437B | 0.17116  |
| 427B -> 438B | -0.23468 |
| 428B -> 437B | -0.44137 |
| 429B -> 437B | -0.29466 |
| 431B -> 438B | -0.14428 |

Excited State 34: 3.000-A 1.6023 eV 773.78 nm f=0.0000 <S\*\*2>=2.000

|              |          |
|--------------|----------|
| 427A -> 437A | -0.32120 |
| 428A -> 438A | -0.46481 |
| 429A -> 438A | -0.32602 |
| 431A -> 437A | -0.23061 |
| 427B -> 437B | 0.32124  |
| 428B -> 438B | 0.46487  |

429B -> 438B 0.32610  
431B -> 437B 0.23059

Excited State 35: 1.000-A 1.6241 eV 763.42 nm f=0.0092 <S\*\*2>=0.000

427A -> 438A 0.19891  
428A -> 437A 0.45335  
429A -> 437A 0.32586  
430A -> 437A -0.10158  
431A -> 438A 0.35127  
427B -> 438B 0.19885  
428B -> 437B 0.45322  
429B -> 437B 0.32581  
430B -> 437B -0.10158  
431B -> 438B 0.35121

Excited State 36: 1.000-A 1.6484 eV 752.15 nm f=0.0118 <S\*\*2>=0.000

427A -> 437A 0.25260  
428A -> 438A 0.39009  
429A -> 438A 0.49023  
430A -> 438A -0.10131  
431A -> 437A 0.10604  
427B -> 437B 0.25255  
428B -> 438B 0.39002  
429B -> 438B 0.49017  
430B -> 438B -0.10130  
431B -> 437B 0.10600

Excited State 37: 3.000-A 1.6679 eV 743.34 nm f=0.0000 <S\*\*2>=2.000

427A -> 438A 0.18197  
428A -> 437A 0.29108  
429A -> 437A -0.32219  
430A -> 437A 0.30447  
431A -> 438A -0.42442  
427B -> 438B -0.18207  
428B -> 437B -0.29129  
429B -> 437B 0.32232



430B -> 437B -0.30459  
431B -> 438B 0.42459

Excited State 38: 1.000-A 1.6799 eV 738.03 nm f=0.0004 <S\*\*2>=0.000

427A -> 438A 0.20840  
428A -> 437A 0.43557  
429A -> 437A -0.27589  
430A -> 437A 0.24672  
431A -> 438A -0.35558  
427B -> 438B 0.20831  
428B -> 437B 0.43542  
429B -> 437B -0.27574  
430B -> 437B 0.24656  
431B -> 438B -0.35540

Excited State 39: 3.000-A 1.6835 eV 736.45 nm f=0.0000 <S\*\*2>=2.000

427A -> 437A 0.25414  
428A -> 438A 0.28766  
429A -> 438A -0.36390  
430A -> 438A 0.35816  
431A -> 437A -0.29074  
427B -> 437B -0.25423  
428B -> 438B -0.28776  
429B -> 438B 0.36401  
430B -> 438B -0.35825  
431B -> 437B 0.29078

Excited State 40: 1.000-A 1.7049 eV 727.24 nm f=0.0000 <S\*\*2>=0.000

427A -> 437A 0.30273  
428A -> 438A 0.39187  
429A -> 438A -0.36690  
430A -> 438A 0.28031  
431A -> 437A -0.19447  
427B -> 437B 0.30265  
428B -> 438B 0.39178  
429B -> 438B -0.36680

430B -> 438B 0.28022  
431B -> 437B -0.19439

Excited State 41: 3.000-A 1.8453 eV 671.89 nm f=0.0000 <S\*\*2>=2.000

410A -> 437A 0.11557  
420A -> 438A -0.10119  
421A -> 437A -0.21786  
422A -> 438A 0.15446  
423A -> 438A -0.12006  
426A -> 437A -0.15065  
427A -> 437A -0.44442  
428A -> 438A 0.33447  
429A -> 438A -0.10807  
410B -> 437B -0.11557  
420B -> 438B 0.10120  
421B -> 437B 0.21787  
422B -> 438B -0.15446  
423B -> 438B 0.12007  
426B -> 437B 0.15066  
427B -> 437B 0.44452  
428B -> 438B -0.33455  
429B -> 438B 0.10807

Excited State 42: 3.000-A 1.8560 eV 668.03 nm f=0.0000 <S\*\*2>=2.000

409A -> 437A -0.11656  
410A -> 438A 0.13488  
416A -> 437A 0.11834  
420A -> 437A -0.13659  
421A -> 438A -0.23079  
422A -> 437A 0.19792  
423A -> 437A -0.14025  
426A -> 438A -0.13204  
427A -> 438A -0.43821  
428A -> 437A 0.23139  
429A -> 437A -0.10263  
409B -> 437B 0.11656

|              |          |
|--------------|----------|
| 410B -> 438B | -0.13488 |
| 416B -> 437B | -0.11833 |
| 420B -> 437B | 0.13660  |
| 421B -> 438B | 0.23080  |
| 422B -> 437B | -0.19793 |
| 423B -> 437B | 0.14026  |
| 426B -> 438B | 0.13204  |
| 427B -> 438B | 0.43829  |
| 428B -> 437B | -0.23143 |
| 429B -> 437B | 0.10263  |

Excited State 43: 1.000-A 1.8720 eV 662.33 nm f=0.0014 <S\*\*2>=0.000

|              |          |
|--------------|----------|
| 427A -> 437A | 0.57087  |
| 428A -> 438A | -0.40921 |
| 427B -> 437B | 0.57087  |
| 428B -> 438B | -0.40922 |

Excited State 44: 3.000-A 1.8857 eV 657.51 nm f=0.0000 <S\*\*2>=2.000

|              |          |
|--------------|----------|
| 409A -> 438A | -0.12523 |
| 410A -> 437A | 0.18593  |
| 416A -> 438A | 0.19842  |
| 417A -> 437A | 0.13009  |
| 421A -> 437A | -0.27017 |
| 422A -> 438A | 0.13816  |
| 423A -> 438A | -0.11895 |
| 426A -> 437A | -0.19690 |
| 427A -> 437A | 0.31694  |
| 428A -> 438A | -0.26918 |
| 409B -> 438B | 0.12523  |
| 410B -> 437B | -0.18592 |
| 416B -> 438B | -0.19841 |
| 417B -> 437B | -0.13009 |
| 421B -> 437B | 0.27017  |
| 422B -> 438B | -0.13817 |
| 423B -> 438B | 0.11896  |
| 426B -> 437B | 0.19691  |

427B -> 437B -0.31679  
428B -> 438B 0.26907

Excited State 45: 3.000-A 1.8922 eV 655.25 nm f=0.0000 <S\*\*2>=2.000

409A -> 437A 0.12856  
410A -> 438A -0.16936  
416A -> 437A -0.21625  
417A -> 438A -0.12583  
419A -> 437A 0.10260  
421A -> 438A 0.22085  
422A -> 437A -0.12749  
426A -> 438A 0.11200  
427A -> 438A -0.40324  
428A -> 437A 0.25429  
409B -> 437B -0.12861  
410B -> 438B 0.16940  
416B -> 437B 0.21656  
417B -> 438B 0.12584  
419B -> 437B -0.10243  
421B -> 438B -0.22062  
422B -> 437B 0.12697  
426B -> 438B -0.11224  
427B -> 438B 0.41145  
428B -> 437B -0.25815

Excited State 46: 1.000-A 1.8925 eV 655.14 nm f=0.0002 <S\*\*2>=0.000

427A -> 438A 0.63738  
428A -> 437A -0.29966  
427B -> 438B 0.63206  
428B -> 437B -0.29633

Excited State 47: 3.000-A 1.9267 eV 643.50 nm f=0.0000 <S\*\*2>=2.000

434A -> 439A -0.11191  
435A -> 440A -0.22147  
436A -> 439A -0.65571  
434B -> 439B 0.11192

435B -> 440B 0.22149  
436B -> 439B 0.65579

Excited State 48: 3.000-A 1.9297 eV 642.51 nm f=0.0000 <S\*\*2>=2.000

410A -> 437A -0.11677  
416A -> 438A -0.11419  
417A -> 437A -0.10803  
420A -> 438A 0.10538  
421A -> 437A 0.12382  
423A -> 438A -0.26457  
426A -> 437A -0.55679  
410B -> 437B 0.11677  
416B -> 438B 0.11419  
417B -> 437B 0.10803  
420B -> 438B -0.10538  
421B -> 437B -0.12382  
423B -> 438B 0.26459  
426B -> 437B 0.55684

Excited State 49: 1.000-A 1.9305 eV 642.25 nm f=0.0000 <S\*\*2>=0.000

434A -> 439A 0.10779  
435A -> 440A 0.21641  
436A -> 439A 0.65987  
434B -> 439B 0.10777  
435B -> 440B 0.21639  
436B -> 439B 0.65980

Excited State 50: 3.000-A 1.9480 eV 636.49 nm f=0.0000 <S\*\*2>=2.000

416A -> 437A -0.10078  
419A -> 437A 0.10874  
423A -> 437A -0.36466  
426A -> 438A -0.51886  
416B -> 437B 0.10078  
419B -> 437B -0.10874  
423B -> 437B 0.36469  
426B -> 438B 0.51889

Excited State 51: 3.000-A 1.9526 eV 634.98 nm f=0.0000 <S\*\*2>=2.000

433A -> 439A -0.10920

435A -> 439A -0.49864

436A -> 440A -0.47663

433B -> 439B 0.10921

435B -> 439B 0.49868

436B -> 440B 0.47667

Excited State 52: 1.000-A 1.9567 eV 633.62 nm f=0.0000 <S\*\*2>=0.000

433A -> 439A 0.10414

435A -> 439A 0.50121

436A -> 440A 0.47759

433B -> 439B 0.10413

435B -> 439B 0.50117

436B -> 440B 0.47755

Excited State 53: 1.000-A 2.0096 eV 616.95 nm f=0.0023 <S\*\*2>=0.000

423A -> 438A 0.24603

426A -> 437A 0.65767

423B -> 438B 0.24601

426B -> 437B 0.65762

Excited State 54: 3.000-A 2.0365 eV 608.80 nm f=0.0000 <S\*\*2>=2.000

435A -> 439A 0.48802

436A -> 440A -0.50625

435B -> 439B -0.48843

436B -> 440B 0.50667

Excited State 55: 1.000-A 2.0368 eV 608.72 nm f=0.0000 <S\*\*2>=0.000

435A -> 439A -0.48772

436A -> 440A 0.50753

435B -> 439B -0.48731

436B -> 440B 0.50711

Excited State 56: 1.000-A 2.0465 eV 605.84 nm f=0.0266 <S\*\*2>=0.000

423A -> 437A 0.40579  
426A -> 438A 0.57295  
423B -> 437B 0.40577  
426B -> 438B 0.57293

Excited State 57: 3.000-A 2.0625 eV 601.14 nm f=0.0000 <S\*\*2>=2.000

435A -> 440A -0.66109  
436A -> 439A 0.23395  
435B -> 440B 0.66119  
436B -> 439B -0.23399

Excited State 58: 1.000-A 2.0632 eV 600.92 nm f=0.0001 <S\*\*2>=0.000

435A -> 440A 0.66410  
436A -> 439A -0.22703  
435B -> 440B 0.66399  
436B -> 439B -0.22699

Excited State 59: 3.000-A 2.0678 eV 599.60 nm f=0.0000 <S\*\*2>=2.000

411A -> 437A 0.23696  
412A -> 437A 0.22291  
413A -> 438A -0.30852  
414A -> 438A -0.15179  
415A -> 437A -0.14382  
417A -> 438A 0.23038  
419A -> 437A -0.34930  
423A -> 437A -0.10250  
426A -> 438A -0.10084  
411B -> 437B -0.23696  
412B -> 437B -0.22291  
413B -> 438B 0.30853  
414B -> 438B 0.15178  
415B -> 437B 0.14382  
417B -> 438B -0.23038  
419B -> 437B 0.34930  
423B -> 437B 0.10247  
426B -> 438B 0.10079

Excited State 60: 3.000-A 2.0711 eV 598.63 nm f=0.0000 <S\*\*2>=2.000

|              |          |
|--------------|----------|
| 411A -> 438A | 0.21677  |
| 412A -> 438A | 0.20169  |
| 413A -> 437A | -0.34808 |
| 414A -> 437A | -0.17429 |
| 415A -> 438A | -0.13974 |
| 417A -> 437A | 0.26891  |
| 419A -> 438A | -0.31057 |
| 426A -> 437A | -0.10256 |
| 411B -> 438B | -0.21678 |
| 412B -> 438B | -0.20169 |
| 413B -> 437B | 0.34809  |
| 414B -> 437B | 0.17428  |
| 415B -> 438B | 0.13974  |
| 417B -> 437B | -0.26891 |
| 419B -> 438B | 0.31057  |
| 426B -> 437B | 0.10254  |

Excited State 61: 3.000-A 2.1767 eV 569.60 nm f=0.0000 <S\*\*2>=2.000

|              |          |
|--------------|----------|
| 422A -> 437A | -0.22937 |
| 423A -> 437A | -0.51421 |
| 426A -> 438A | 0.35191  |
| 422B -> 437B | 0.22943  |
| 423B -> 437B | 0.51449  |
| 426B -> 438B | -0.35211 |

Excited State 62: 1.000-A 2.1883 eV 566.58 nm f=0.0006 <S\*\*2>=0.000

|              |          |
|--------------|----------|
| 420A -> 437A | 0.12347  |
| 423A -> 437A | 0.55760  |
| 426A -> 438A | -0.39624 |
| 420B -> 437B | 0.12343  |
| 423B -> 437B | 0.55736  |
| 426B -> 438B | -0.39608 |

Excited State 63: 3.000-A 2.1968 eV 564.40 nm f=0.0000 <S\*\*2>=2.000



|              |          |
|--------------|----------|
| 413A -> 437A | 0.11994  |
| 417A -> 437A | 0.13627  |
| 421A -> 437A | 0.13822  |
| 422A -> 438A | -0.21526 |
| 423A -> 438A | -0.54634 |
| 426A -> 437A | 0.25528  |
| 413B -> 437B | -0.11994 |
| 417B -> 437B | -0.13628 |
| 421B -> 437B | -0.13824 |
| 422B -> 438B | 0.21529  |
| 423B -> 438B | 0.54648  |
| 426B -> 437B | -0.25533 |

Excited State 64: 3.000-A 2.2206 eV 558.35 nm f=0.0000 <S\*\*2>=2.000

|              |          |
|--------------|----------|
| 409A -> 437A | -0.11733 |
| 410A -> 438A | 0.16457  |
| 412A -> 437A | -0.12132 |
| 413A -> 438A | 0.14437  |
| 415A -> 437A | -0.16038 |
| 416A -> 437A | 0.16200  |
| 418A -> 438A | -0.15479 |
| 421A -> 438A | 0.24153  |
| 422A -> 437A | -0.40524 |
| 423A -> 437A | 0.17113  |
| 426A -> 438A | -0.19914 |
| 409B -> 437B | 0.11733  |
| 410B -> 438B | -0.16457 |
| 412B -> 437B | 0.12132  |
| 413B -> 438B | -0.14437 |
| 415B -> 437B | 0.16039  |
| 416B -> 437B | -0.16200 |
| 418B -> 438B | 0.15480  |
| 421B -> 438B | -0.24157 |
| 422B -> 437B | 0.40531  |
| 423B -> 437B | -0.17111 |
| 426B -> 438B | 0.19913  |

Excited State 65: 1.000-A 2.2221 eV 557.97 nm f=0.0002 <S\*\*2>=0.000

420A -> 438A 0.10037  
423A -> 438A 0.64483  
426A -> 437A -0.23928  
420B -> 438B 0.10040  
423B -> 438B 0.64482  
426B -> 437B -0.23931

Excited State 66: 3.000-A 2.2258 eV 557.04 nm f=0.0000 <S\*\*2>=2.000

409A -> 438A 0.13501  
410A -> 437A -0.22171  
412A -> 438A 0.10374  
413A -> 437A -0.14405  
415A -> 438A 0.16993  
416A -> 438A -0.13163  
418A -> 437A 0.18535  
421A -> 437A -0.32543  
422A -> 438A 0.28534  
423A -> 438A -0.22197  
426A -> 437A 0.17200  
409B -> 438B -0.13501  
410B -> 437B 0.22171  
412B -> 438B -0.10374  
413B -> 437B 0.14405  
415B -> 438B -0.16993  
416B -> 438B 0.13163  
418B -> 437B -0.18536  
421B -> 437B 0.32552  
422B -> 438B -0.28542  
423B -> 438B 0.22167  
426B -> 437B -0.17190

Excited State 67: 1.000-A 2.2614 eV 548.25 nm f=0.0136 <S\*\*2>=0.000

420A -> 438A 0.14150  
421A -> 437A 0.57849

422A -> 438A -0.33725  
420B -> 438B 0.14149  
421B -> 437B 0.57844  
422B -> 438B -0.33720

Excited State 68: 1.000-A 2.2675 eV 546.78 nm f=0.0687 <S\*\*2>=0.000

420A -> 437A -0.12009  
421A -> 438A -0.38265  
422A -> 437A 0.55760  
420B -> 437B -0.12008  
421B -> 438B -0.38261  
422B -> 437B 0.55755

Excited State 69: 3.000-A 2.2835 eV 542.96 nm f=0.0000 <S\*\*2>=2.000

410A -> 437A -0.12324  
417A -> 437A 0.14232  
424A -> 437A -0.38072  
424A -> 438A 0.15408  
425A -> 437A -0.21260  
425A -> 438A -0.44502  
410B -> 437B 0.12324  
417B -> 437B -0.14233  
424B -> 437B 0.38043  
424B -> 438B -0.15431  
425B -> 437B 0.21390  
425B -> 438B 0.44539

Excited State 70: 3.000-A 2.2847 eV 542.66 nm f=0.0000 <S\*\*2>=2.000

424A -> 437A -0.22181  
424A -> 438A 0.47123  
425A -> 437A 0.40441  
425A -> 438A 0.17088  
424B -> 437B 0.22162  
424B -> 438B -0.47099  
425B -> 437B -0.40499  
425B -> 438B -0.17294

Excited State 71: 1.000-A 2.2861 eV 542.33 nm f=0.0000 <S\*\*2>=0.000

|              |         |
|--------------|---------|
| 424A -> 437A | 0.13364 |
| 424A -> 438A | 0.22539 |
| 425A -> 437A | 0.44984 |
| 425A -> 438A | 0.47361 |
| 424B -> 437B | 0.13295 |
| 424B -> 438B | 0.22376 |
| 425B -> 437B | 0.44882 |
| 425B -> 438B | 0.47293 |

Excited State 72: 1.000-A 2.2864 eV 542.27 nm f=0.0000 <S\*\*2>=0.000

|              |          |
|--------------|----------|
| 424A -> 437A | -0.45193 |
| 424A -> 438A | 0.47290  |
| 425A -> 437A | 0.13086  |
| 425A -> 438A | -0.21954 |
| 424B -> 437B | -0.45246 |
| 424B -> 438B | 0.47380  |
| 425B -> 437B | 0.13052  |
| 425B -> 438B | -0.21875 |

Excited State 73: 3.000-A 2.2962 eV 539.94 nm f=0.0000 <S\*\*2>=2.000

|              |          |
|--------------|----------|
| 409A -> 438A | -0.20452 |
| 410A -> 437A | 0.25780  |
| 412A -> 438A | 0.10001  |
| 413A -> 437A | -0.17957 |
| 415A -> 438A | -0.10922 |
| 416A -> 438A | -0.12264 |
| 417A -> 437A | -0.29751 |
| 419A -> 438A | 0.12745  |
| 421A -> 437A | 0.13925  |
| 422A -> 438A | 0.13535  |
| 423A -> 438A | -0.18667 |
| 424A -> 437A | -0.18505 |
| 425A -> 438A | -0.18958 |
| 409B -> 438B | 0.20453  |

|              |          |
|--------------|----------|
| 410B -> 437B | -0.25780 |
| 412B -> 438B | -0.10001 |
| 413B -> 437B | 0.17958  |
| 415B -> 438B | 0.10922  |
| 416B -> 438B | 0.12264  |
| 417B -> 437B | 0.29753  |
| 419B -> 438B | -0.12746 |
| 421B -> 437B | -0.13925 |
| 422B -> 438B | -0.13537 |
| 423B -> 438B | 0.18666  |
| 424B -> 437B | 0.18493  |
| 425B -> 438B | 0.18938  |

Excited State 74: 3.000-A 2.3008 eV 538.87 nm f=0.0000 <S\*\*2>=2.000

|              |          |
|--------------|----------|
| 397A -> 437A | -0.10233 |
| 406A -> 437A | 0.12002  |
| 409A -> 437A | -0.25451 |
| 410A -> 438A | 0.25769  |
| 412A -> 437A | 0.11807  |
| 413A -> 438A | -0.15894 |
| 415A -> 437A | -0.17396 |
| 416A -> 437A | -0.13582 |
| 417A -> 438A | -0.26119 |
| 419A -> 437A | 0.18388  |
| 421A -> 438A | 0.19050  |
| 422A -> 437A | 0.11773  |
| 423A -> 437A | -0.13936 |
| 424A -> 438A | -0.11796 |
| 425A -> 437A | -0.10803 |
| 397B -> 437B | 0.10233  |
| 406B -> 437B | -0.12002 |
| 409B -> 437B | 0.25451  |
| 410B -> 438B | -0.25769 |
| 412B -> 437B | -0.11807 |
| 413B -> 438B | 0.15894  |
| 415B -> 437B | 0.17396  |

|              |          |
|--------------|----------|
| 416B -> 437B | 0.13583  |
| 417B -> 438B | 0.26120  |
| 419B -> 437B | -0.18390 |
| 421B -> 438B | -0.19051 |
| 422B -> 437B | -0.11774 |
| 423B -> 437B | 0.13936  |
| 424B -> 438B | 0.11788  |
| 425B -> 437B | 0.10793  |

Excited State 75: 1.000-A 2.3333 eV 531.36 nm f=0.0042 <S\*\*2>=0.000

|              |          |
|--------------|----------|
| 413A -> 438A | 0.12016  |
| 416A -> 437A | 0.13179  |
| 417A -> 438A | -0.11583 |
| 418A -> 438A | -0.21798 |
| 419A -> 437A | 0.41771  |
| 420A -> 437A | -0.28149 |
| 421A -> 438A | -0.23033 |
| 422A -> 437A | -0.25038 |
| 413B -> 438B | 0.12007  |
| 416B -> 437B | 0.13182  |
| 417B -> 438B | -0.11588 |
| 418B -> 438B | -0.21805 |
| 419B -> 437B | 0.41785  |
| 420B -> 437B | -0.28172 |
| 421B -> 438B | -0.23049 |
| 422B -> 437B | -0.25056 |

Excited State 76: 3.000-A 2.3401 eV 529.81 nm f=0.0000 <S\*\*2>=2.000

|              |          |
|--------------|----------|
| 396A -> 438A | 0.17211  |
| 397A -> 437A | 0.18612  |
| 411A -> 437A | -0.11212 |
| 413A -> 438A | 0.13416  |
| 418A -> 438A | 0.12184  |
| 419A -> 437A | -0.22278 |
| 420A -> 437A | 0.36608  |
| 421A -> 438A | 0.25265  |

|              |          |
|--------------|----------|
| 422A -> 437A | 0.28695  |
| 396B -> 438B | -0.17209 |
| 397B -> 437B | -0.18610 |
| 411B -> 437B | 0.11217  |
| 413B -> 438B | -0.13424 |
| 418B -> 438B | -0.12169 |
| 419B -> 437B | 0.22249  |
| 420B -> 437B | -0.36594 |
| 421B -> 438B | -0.25253 |
| 422B -> 437B | -0.28681 |

Excited State 77: 3.000-A 2.3454 eV 528.63 nm f=0.0000 <S\*\*2>=2.000

|              |          |
|--------------|----------|
| 431A -> 439A | -0.13857 |
| 433A -> 440A | 0.26797  |
| 434A -> 439A | 0.61092  |
| 436A -> 439A | -0.11872 |
| 431B -> 439B | 0.13856  |
| 433B -> 440B | -0.26793 |
| 434B -> 439B | -0.61082 |
| 436B -> 439B | 0.11870  |

Excited State 78: 3.000-A 2.3476 eV 528.14 nm f=0.0000 <S\*\*2>=2.000

|              |          |
|--------------|----------|
| 396A -> 437A | -0.22804 |
| 397A -> 438A | -0.21648 |
| 413A -> 437A | -0.12449 |
| 416A -> 438A | 0.10849  |
| 418A -> 437A | -0.31443 |
| 419A -> 438A | 0.28325  |
| 420A -> 438A | -0.14244 |
| 421A -> 437A | -0.23052 |
| 422A -> 438A | -0.23225 |
| 396B -> 437B | 0.22805  |
| 397B -> 438B | 0.21649  |
| 413B -> 437B | 0.12445  |
| 416B -> 438B | -0.10854 |
| 418B -> 437B | 0.31456  |

419B -> 438B -0.28338  
420B -> 438B 0.14248  
421B -> 437B 0.23056  
422B -> 438B 0.23239

Excited State 79: 1.000-A 2.3524 eV 527.06 nm f=0.0002 <S\*\*2>=0.000

431A -> 439A -0.12515  
433A -> 440A 0.26184  
434A -> 439A 0.62306  
436A -> 439A -0.11233  
431B -> 439B -0.12518  
433B -> 440B 0.26188  
434B -> 439B 0.62315  
436B -> 439B -0.11235

Excited State 80: 1.000-A 2.3577 eV 525.86 nm f=0.0131 <S\*\*2>=0.000

413A -> 437A 0.13926  
416A -> 438A 0.13625  
417A -> 437A -0.15554  
418A -> 437A -0.34934  
419A -> 438A 0.36457  
420A -> 438A -0.12281  
421A -> 437A -0.10245  
422A -> 438A -0.34566  
413B -> 437B 0.13930  
416B -> 438B 0.13621  
417B -> 437B -0.15552  
418B -> 437B -0.34921  
419B -> 438B 0.36446  
420B -> 438B -0.12277  
421B -> 437B -0.10238  
422B -> 438B -0.34558

Excited State 81: 3.000-A 2.3609 eV 525.15 nm f=0.0000 <S\*\*2>=2.000

431A -> 440A -0.12366  
433A -> 439A 0.51921



|              |          |
|--------------|----------|
| 434A -> 440A | 0.41175  |
| 435A -> 439A | -0.10144 |
| 436A -> 440A | -0.11323 |
| 431B -> 440B | 0.12365  |
| 433B -> 439B | -0.51915 |
| 434B -> 440B | -0.41170 |
| 435B -> 439B | 0.10143  |
| 436B -> 440B | 0.11321  |

Excited State 82: 3.000-A 2.3646 eV 524.33 nm f=0.0000 <S\*\*2>=2.000

|              |          |
|--------------|----------|
| 396A -> 438A | 0.14629  |
| 397A -> 437A | 0.17929  |
| 409A -> 437A | -0.13404 |
| 416A -> 437A | -0.23576 |
| 417A -> 438A | -0.12922 |
| 418A -> 438A | 0.30434  |
| 419A -> 437A | -0.25557 |
| 420A -> 437A | -0.32387 |
| 422A -> 437A | -0.22510 |
| 396B -> 438B | -0.14630 |
| 397B -> 437B | -0.17931 |
| 409B -> 437B | 0.13403  |
| 416B -> 437B | 0.23580  |
| 417B -> 438B | 0.12920  |
| 418B -> 438B | -0.30445 |
| 419B -> 437B | 0.25573  |
| 420B -> 437B | 0.32405  |
| 422B -> 437B | 0.22520  |

Excited State 83: 1.000-A 2.3692 eV 523.32 nm f=0.0001 <S\*\*2>=0.000

|              |          |
|--------------|----------|
| 431A -> 440A | -0.11202 |
| 433A -> 439A | 0.52434  |
| 434A -> 440A | 0.41990  |
| 436A -> 440A | -0.10718 |
| 431B -> 440B | -0.11204 |
| 433B -> 439B | 0.52440  |

434B -> 440B 0.41994  
436B -> 440B -0.10719

Excited State 84: 1.000-A 2.3741 eV 522.23 nm f=0.0036 <S\*\*2>=0.000

418A -> 438A -0.21502  
419A -> 437A 0.35591  
420A -> 437A 0.35991  
421A -> 438A 0.29225  
422A -> 437A 0.25347  
418B -> 438B -0.21489  
419B -> 437B 0.35580  
420B -> 437B 0.35973  
421B -> 438B 0.29221  
422B -> 437B 0.25334

Excited State 85: 3.000-A 2.3808 eV 520.76 nm f=0.0000 <S\*\*2>=2.000

416A -> 438A -0.12469  
417A -> 437A -0.13829  
418A -> 437A 0.28999  
419A -> 438A -0.14351  
420A -> 438A -0.32040  
421A -> 437A -0.15415  
422A -> 438A -0.43919  
416B -> 438B 0.12472  
417B -> 437B 0.13826  
418B -> 437B -0.29012  
419B -> 438B 0.14362  
420B -> 438B 0.32047  
421B -> 437B 0.15427  
422B -> 438B 0.43938

Excited State 86: 1.000-A 2.3913 eV 518.48 nm f=0.0119 <S\*\*2>=0.000

418A -> 437A -0.26641  
419A -> 438A 0.23414  
420A -> 438A 0.11753  
421A -> 437A 0.29623

422A -> 438A 0.49167  
418B -> 437B -0.26629  
419B -> 438B 0.23408  
420B -> 438B 0.11738  
421B -> 437B 0.29616  
422B -> 438B 0.49147

Excited State 87: 1.000-A 2.4213 eV 512.05 nm f=0.0002 <S\*\*2>=0.000

416A -> 437A 0.12365  
420A -> 437A 0.49495  
421A -> 438A -0.41459  
422A -> 437A -0.19462  
416B -> 437B 0.12363  
420B -> 437B 0.49521  
421B -> 438B -0.41483  
422B -> 437B -0.19478

Excited State 88: 3.000-A 2.4288 eV 510.48 nm f=0.0000 <S\*\*2>=2.000

409A -> 437A -0.10930  
417A -> 438A -0.13492  
418A -> 438A 0.17063  
420A -> 437A 0.43590  
421A -> 438A -0.37674  
422A -> 437A -0.24585  
409B -> 437B 0.10932  
417B -> 438B 0.13496  
418B -> 438B -0.17062  
420B -> 437B -0.43559  
421B -> 438B 0.37648  
422B -> 437B 0.24573

Excited State 89: 3.000-A 2.4450 eV 507.09 nm f=0.0000 <S\*\*2>=2.000

396A -> 437A 0.10554  
397A -> 438A 0.10172  
418A -> 437A -0.16446  
420A -> 438A -0.54790

|              |          |
|--------------|----------|
| 421A -> 437A | 0.25490  |
| 422A -> 438A | 0.18332  |
| 396B -> 437B | -0.10554 |
| 397B -> 438B | -0.10173 |
| 418B -> 437B | 0.16444  |
| 420B -> 438B | 0.54817  |
| 421B -> 437B | -0.25497 |
| 422B -> 438B | -0.18334 |

Excited State 90: 1.000-A 2.4554 eV 504.95 nm f=0.0006 <S\*\*2>=0.000

|              |          |
|--------------|----------|
| 416A -> 438A | 0.10063  |
| 417A -> 437A | 0.12112  |
| 420A -> 438A | 0.64048  |
| 421A -> 437A | -0.18828 |
| 416B -> 438B | 0.10061  |
| 417B -> 437B | 0.12097  |
| 420B -> 438B | 0.64057  |
| 421B -> 437B | -0.18862 |

Excited State 91: 3.000-A 2.4559 eV 504.85 nm f=0.0000 <S\*\*2>=2.000

|              |          |
|--------------|----------|
| 395A -> 437A | -0.13304 |
| 396A -> 437A | -0.33461 |
| 397A -> 438A | -0.32534 |
| 399A -> 438A | 0.11073  |
| 412A -> 438A | -0.10527 |
| 413A -> 437A | 0.12656  |
| 414A -> 437A | 0.11942  |
| 415A -> 438A | 0.13374  |
| 418A -> 437A | 0.24926  |
| 419A -> 438A | -0.13466 |
| 420A -> 438A | -0.13577 |
| 421A -> 437A | 0.17755  |
| 395B -> 437B | 0.13309  |
| 396B -> 437B | 0.33463  |
| 397B -> 438B | 0.32536  |
| 399B -> 438B | -0.11074 |

412B -> 438B 0.10540  
413B -> 437B -0.12670  
414B -> 437B -0.11940  
415B -> 438B -0.13383  
418B -> 437B -0.24911  
419B -> 438B 0.13459  
420B -> 438B 0.13421  
421B -> 437B -0.17709

Excited State 92: 3.000-A 2.4606 eV 503.87 nm f=0.0000 <S\*\*2>=2.000

395A -> 438A -0.12393  
396A -> 438A -0.30473  
397A -> 437A -0.35213  
399A -> 437A 0.12108  
411A -> 437A -0.10225  
412A -> 437A -0.14071  
413A -> 438A 0.11990  
414A -> 438A 0.10585  
415A -> 437A 0.16636  
418A -> 438A 0.21641  
419A -> 437A -0.20530  
421A -> 438A 0.17927  
395B -> 438B 0.12393  
396B -> 438B 0.30473  
397B -> 437B 0.35213  
399B -> 437B -0.12107  
411B -> 437B 0.10227  
412B -> 437B 0.14073  
413B -> 438B -0.11993  
414B -> 438B -0.10586  
415B -> 437B -0.16637  
418B -> 438B -0.21642  
419B -> 437B 0.20531  
421B -> 438B -0.17927

Excited State 93: 3.000-A 2.4639 eV 503.21 nm f=0.0000 <S\*\*2>=2.000

433A -> 439A -0.43091  
434A -> 440A 0.53952  
433B -> 439B 0.43080  
434B -> 440B -0.53939

Excited State 94: 1.000-A 2.4658 eV 502.81 nm f=0.0002 <S\*\*2>=0.000

433A -> 439A -0.44219  
434A -> 440A 0.54231  
433B -> 439B -0.44229  
434B -> 440B 0.54245

Excited State 95: 3.000-A 2.4780 eV 500.34 nm f=0.0000 <S\*\*2>=2.000

433A -> 440A 0.60590  
434A -> 439A -0.29356  
433B -> 440B -0.60586  
434B -> 439B 0.29354

Excited State 96: 3.000-A 2.4801 eV 499.92 nm f=0.0000 <S\*\*2>=2.000

407A -> 440A -0.47820  
408A -> 439A -0.48963  
407B -> 440B 0.47820  
408B -> 439B 0.48963

Excited State 97: 3.000-A 2.4804 eV 499.86 nm f=0.0000 <S\*\*2>=2.000

407A -> 439A -0.48939  
408A -> 440A -0.46918  
433A -> 440A -0.10462  
407B -> 439B 0.48939  
408B -> 440B 0.46918  
433B -> 440B 0.10461

Excited State 98: 1.000-A 2.4816 eV 499.62 nm f=0.0002 <S\*\*2>=0.000

433A -> 440A 0.62980  
434A -> 439A -0.29057  
433B -> 440B 0.62985  
434B -> 439B -0.29059

Excited State 99: 1.000-A 2.5016 eV 495.61 nm f=0.0505 <S\*\*2>=0.000

|              |          |
|--------------|----------|
| 409A -> 438A | 0.12598  |
| 410A -> 437A | -0.15634 |
| 413A -> 437A | -0.17834 |
| 417A -> 437A | 0.50168  |
| 418A -> 437A | -0.33510 |
| 420A -> 438A | -0.12337 |
| 409B -> 438B | 0.12597  |
| 410B -> 437B | -0.15633 |
| 413B -> 437B | -0.17834 |
| 417B -> 437B | 0.50167  |
| 418B -> 437B | -0.33508 |
| 420B -> 438B | -0.12336 |

Excited State 100: 1.000-A 2.5167 eV 492.66 nm f=0.0022 <S\*\*2>=0.000

|              |          |
|--------------|----------|
| 409A -> 437A | -0.13330 |
| 410A -> 438A | 0.11214  |
| 411A -> 437A | -0.24035 |
| 412A -> 437A | -0.30288 |
| 413A -> 438A | 0.34987  |
| 414A -> 438A | 0.13684  |
| 416A -> 437A | 0.23967  |
| 419A -> 437A | -0.25014 |
| 421A -> 438A | 0.11273  |
| 409B -> 437B | -0.13330 |
| 410B -> 438B | 0.11214  |
| 411B -> 437B | -0.24035 |
| 412B -> 437B | -0.30287 |
| 413B -> 438B | 0.34987  |
| 414B -> 438B | 0.13683  |
| 416B -> 437B | 0.23968  |
| 419B -> 437B | -0.25013 |
| 421B -> 438B | 0.11272  |

Excited State 101: 1.000-A 2.5195 eV 492.10 nm f=0.0096 <S\*\*2>=0.000

|              |          |
|--------------|----------|
| 411A -> 438A | -0.20772 |
| 412A -> 438A | -0.24017 |
| 413A -> 437A | 0.40627  |
| 414A -> 437A | 0.16541  |
| 416A -> 438A | 0.17233  |
| 417A -> 437A | 0.29645  |
| 419A -> 438A | -0.15100 |
| 411B -> 438B | -0.20772 |
| 412B -> 438B | -0.24016 |
| 413B -> 437B | 0.40627  |
| 414B -> 437B | 0.16539  |
| 416B -> 438B | 0.17232  |
| 417B -> 437B | 0.29644  |
| 419B -> 438B | -0.15099 |

Excited State 102: 1.000-A 2.5278 eV 490.48 nm f=0.0022 <S\*\*2>=0.000

|              |          |
|--------------|----------|
| 409A -> 437A | 0.17107  |
| 410A -> 438A | -0.13471 |
| 416A -> 437A | 0.42410  |
| 417A -> 438A | 0.30400  |
| 418A -> 438A | -0.32460 |
| 419A -> 437A | -0.10555 |
| 409B -> 437B | 0.17106  |
| 410B -> 438B | -0.13470 |
| 416B -> 437B | 0.42411  |
| 417B -> 438B | 0.30397  |
| 418B -> 438B | -0.32459 |
| 419B -> 437B | -0.10556 |

Excited State 103: 3.000-A 2.5316 eV 489.75 nm f=0.0000 <S\*\*2>=2.000

|              |          |
|--------------|----------|
| 429A -> 442A | -0.10900 |
| 431A -> 441A | 0.15107  |
| 433A -> 442A | -0.20902 |
| 434A -> 441A | -0.23827 |
| 435A -> 442A | -0.27931 |
| 436A -> 441A | -0.47247 |



429B -> 442B 0.10901  
431B -> 441B -0.15107  
433B -> 442B 0.20902  
434B -> 441B 0.23827  
435B -> 442B 0.27931  
436B -> 441B 0.47247

Excited State 104: 3.000-A 2.5442 eV 487.32 nm f=0.0000 <S\*\*2>=2.000

429A -> 441A -0.12060  
431A -> 442A 0.14003  
433A -> 441A -0.24204  
434A -> 442A -0.22080  
435A -> 441A -0.36374  
436A -> 442A -0.40096  
429B -> 441B 0.12060  
431B -> 442B -0.14003  
433B -> 441B 0.24204  
434B -> 442B 0.22080  
435B -> 441B 0.36374  
436B -> 442B 0.40096

Excited State 105: 3.000-A 2.5694 eV 482.54 nm f=0.0000 <S\*\*2>=2.000

415A -> 437A -0.17129  
416A -> 437A -0.49510  
417A -> 438A 0.39978  
419A -> 437A 0.14174  
421A -> 438A -0.12148  
415B -> 437B 0.17128  
416B -> 437B 0.49519  
417B -> 438B -0.39999  
419B -> 437B -0.14177  
421B -> 438B 0.12148

Excited State 106: 3.000-A 2.5722 eV 482.02 nm f=0.0000 <S\*\*2>=2.000

416A -> 438A 0.27198  
417A -> 437A -0.45022

418A -> 437A -0.17903  
419A -> 438A -0.39186  
416B -> 438B -0.27216  
417B -> 437B 0.45046  
418B -> 437B 0.17935  
419B -> 438B 0.39233

Excited State 107: 1.000-A 2.5769 eV 481.14 nm f=0.0157 <S\*\*2>=0.000

416A -> 438A -0.15931  
417A -> 437A 0.26444  
418A -> 437A 0.35369  
419A -> 438A 0.50208  
416B -> 438B -0.15904  
417B -> 437B 0.26403  
418B -> 437B 0.35353  
419B -> 438B 0.50174

Excited State 108: 1.000-A 2.5819 eV 480.20 nm f=0.0091 <S\*\*2>=0.000

411A -> 437A -0.12061  
412A -> 437A -0.12016  
415A -> 437A 0.12975  
416A -> 437A -0.24138  
417A -> 438A 0.56955  
418A -> 438A 0.12426  
419A -> 437A 0.20728  
411B -> 437B -0.12057  
412B -> 437B -0.12015  
415B -> 437B 0.12983  
416B -> 437B -0.24119  
417B -> 438B 0.56946  
418B -> 438B 0.12432  
419B -> 437B 0.20728

Excited State 109: 3.000-A 2.5981 eV 477.21 nm f=0.0000 <S\*\*2>=2.000

413A -> 438A 0.16023  
415A -> 437A -0.16252

416A -> 437A -0.19410  
417A -> 438A -0.28994  
418A -> 438A -0.41278  
419A -> 437A -0.33440  
413B -> 438B -0.16069  
415B -> 437B 0.16330  
416B -> 437B 0.19519  
417B -> 438B 0.28962  
418B -> 438B 0.41423  
419B -> 437B 0.33510

Excited State 110: 1.000-A 2.5992 eV 477.01 nm f=0.0023 <S\*\*2>=0.000

413A -> 438A -0.14251  
415A -> 437A 0.25124  
416A -> 437A 0.33033  
418A -> 438A 0.46059  
419A -> 437A 0.23087  
413B -> 438B -0.14200  
415B -> 437B 0.25070  
416B -> 437B 0.32966  
418B -> 438B 0.45928  
419B -> 437B 0.22983

Excited State 111: 3.000-A 2.6007 eV 476.74 nm f=0.0000 <S\*\*2>=2.000

432A -> 439A -0.68854  
432B -> 439B 0.68859

Excited State 112: 3.000-A 2.6032 eV 476.28 nm f=0.0000 <S\*\*2>=2.000

413A -> 437A 0.15864  
415A -> 438A -0.18019  
416A -> 438A -0.51032  
418A -> 437A -0.29353  
419A -> 438A -0.23879  
421A -> 437A -0.10636  
413B -> 437B -0.15870  
415B -> 438B 0.18026

416B -> 438B 0.51057  
418B -> 437B 0.29358  
419B -> 438B 0.23880  
421B -> 437B 0.10639

Excited State 113: 1.000-A 2.6067 eV 475.64 nm f=0.0015 <S\*\*2>=0.000  
432A -> 439A 0.69590  
432B -> 439B 0.69585

Excited State 114: 1.000-A 2.6149 eV 474.14 nm f=0.0041 <S\*\*2>=0.000  
409A -> 438A 0.10851  
410A -> 437A -0.12967  
413A -> 437A -0.13571  
415A -> 438A 0.20689  
416A -> 438A 0.58271  
417A -> 437A -0.10100  
418A -> 437A 0.18129  
409B -> 438B 0.10850  
410B -> 437B -0.12967  
413B -> 437B -0.13565  
415B -> 438B 0.20682  
416B -> 438B 0.58250  
417B -> 437B -0.10097  
418B -> 437B 0.18118

Excited State 115: 3.000-A 2.6523 eV 467.46 nm f=0.0000 <S\*\*2>=2.000  
430A -> 439A 0.16274  
432A -> 440A -0.67420  
430B -> 439B -0.16275  
432B -> 440B 0.67425

Excited State 116: 1.000-A 2.6589 eV 466.30 nm f=0.0000 <S\*\*2>=0.000  
430A -> 439A -0.12073  
432A -> 440A 0.68647  
430B -> 439B -0.12072  
432B -> 440B 0.68643

Excited State 117: 3.000-A 2.6629 eV 465.60 nm f=0.0000 <S\*\*2>=2.000

|              |          |
|--------------|----------|
| 404A -> 438A | -0.14839 |
| 406A -> 437A | -0.10888 |
| 409A -> 437A | 0.18153  |
| 411A -> 437A | -0.10239 |
| 413A -> 438A | 0.18148  |
| 414A -> 438A | -0.15045 |
| 415A -> 437A | -0.43545 |
| 416A -> 437A | 0.10863  |
| 417A -> 438A | -0.14121 |
| 418A -> 438A | 0.30165  |
| 419A -> 437A | 0.11423  |
| 404B -> 438B | 0.14840  |
| 406B -> 437B | 0.10887  |
| 409B -> 437B | -0.18150 |
| 411B -> 437B | 0.10241  |
| 413B -> 438B | -0.18150 |
| 414B -> 438B | 0.15051  |
| 415B -> 437B | 0.43563  |
| 416B -> 437B | -0.10868 |
| 417B -> 438B | 0.14114  |
| 418B -> 438B | -0.30173 |
| 419B -> 437B | -0.11426 |

Excited State 118: 3.000-A 2.6671 eV 464.87 nm f=0.0000 <S\*\*2>=2.000

|              |          |
|--------------|----------|
| 404A -> 437A | -0.18457 |
| 406A -> 438A | -0.10430 |
| 409A -> 438A | 0.14345  |
| 413A -> 437A | 0.21530  |
| 414A -> 437A | -0.29154 |
| 415A -> 438A | -0.40144 |
| 417A -> 437A | -0.11403 |
| 418A -> 437A | 0.20442  |
| 419A -> 438A | 0.14083  |
| 404B -> 437B | 0.18458  |

|              |          |
|--------------|----------|
| 406B -> 438B | 0.10430  |
| 409B -> 438B | -0.14344 |
| 413B -> 437B | -0.21531 |
| 414B -> 437B | 0.29160  |
| 415B -> 438B | 0.40150  |
| 417B -> 437B | 0.11402  |
| 418B -> 437B | -0.20443 |
| 419B -> 438B | -0.14084 |

Excited State 119: 1.000-A 2.6718 eV 464.05 nm f=0.0014 <S\*\*2>=0.000

|              |          |
|--------------|----------|
| 396A -> 438A | -0.10182 |
| 397A -> 437A | -0.10197 |
| 409A -> 437A | 0.16618  |
| 410A -> 438A | -0.15282 |
| 412A -> 437A | -0.10913 |
| 414A -> 438A | 0.13063  |
| 415A -> 437A | 0.47214  |
| 416A -> 437A | -0.16901 |
| 417A -> 438A | -0.15743 |
| 418A -> 438A | -0.20809 |
| 435A -> 443A | -0.12549 |
| 436A -> 444A | 0.12046  |
| 396B -> 438B | -0.10183 |
| 397B -> 437B | -0.10200 |
| 409B -> 437B | 0.16624  |
| 410B -> 438B | -0.15285 |
| 412B -> 437B | -0.10911 |
| 414B -> 438B | 0.13057  |
| 415B -> 437B | 0.47199  |
| 416B -> 437B | -0.16897 |
| 417B -> 438B | -0.15747 |
| 418B -> 438B | -0.20797 |
| 435B -> 443B | -0.12548 |
| 436B -> 444B | 0.12046  |

Excited State 120: 1.000-A 2.6834 eV 462.04 nm f=0.0299 <S\*\*2>=0.000

|              |          |
|--------------|----------|
| 396A -> 437A | 0.12419  |
| 397A -> 438A | 0.10203  |
| 409A -> 438A | -0.19120 |
| 410A -> 437A | 0.33771  |
| 414A -> 437A | -0.27579 |
| 415A -> 438A | -0.31716 |
| 416A -> 438A | 0.18013  |
| 435A -> 444A | -0.14188 |
| 436A -> 443A | 0.15098  |
| 396B -> 437B | 0.12419  |
| 397B -> 438B | 0.10204  |
| 409B -> 438B | -0.19122 |
| 410B -> 437B | 0.33773  |
| 414B -> 437B | -0.27575 |
| 415B -> 438B | -0.31710 |
| 416B -> 438B | 0.18012  |
| 435B -> 444B | -0.14188 |
| 436B -> 443B | 0.15099  |

Excited State 121: 3.000-A 2.6933 eV 460.34 nm f=0.0000 <S\*\*2>=2.000

|              |          |
|--------------|----------|
| 429A -> 440A | 0.17003  |
| 430A -> 440A | -0.27396 |
| 431A -> 439A | -0.57373 |
| 433A -> 440A | -0.15548 |
| 434A -> 439A | -0.12005 |
| 429B -> 440B | -0.17004 |
| 430B -> 440B | 0.27396  |
| 431B -> 439B | 0.57374  |
| 433B -> 440B | 0.15548  |
| 434B -> 439B | 0.12006  |

Excited State 122: 1.000-A 2.7032 eV 458.66 nm f=0.0051 <S\*\*2>=0.000

|              |         |
|--------------|---------|
| 431A -> 439A | 0.18476 |
| 434A -> 441A | 0.10840 |
| 435A -> 442A | 0.24242 |
| 436A -> 441A | 0.59694 |

431B -> 439B 0.18476  
434B -> 441B 0.10840  
435B -> 442B 0.24242  
436B -> 441B 0.59694

Excited State 123: 3.000-A 2.7034 eV 458.63 nm f=0.0000 <S\*\*2>=2.000

429A -> 439A 0.22476  
430A -> 439A -0.36547  
431A -> 440A -0.38266  
433A -> 439A -0.12175  
434A -> 440A -0.11608  
435A -> 444A 0.19581  
436A -> 443A -0.22962  
429B -> 439B -0.22476  
430B -> 439B 0.36547  
431B -> 440B 0.38267  
433B -> 439B 0.12175  
434B -> 440B 0.11608  
435B -> 444B -0.19581  
436B -> 443B 0.22962

Excited State 124: 3.000-A 2.7076 eV 457.91 nm f=0.0000 <S\*\*2>=2.000

429A -> 439A 0.12581  
430A -> 439A -0.20390  
431A -> 440A -0.20755  
435A -> 444A -0.35696  
436A -> 443A 0.42053  
429B -> 439B -0.12582  
430B -> 439B 0.20391  
431B -> 440B 0.20756  
435B -> 444B 0.35696  
436B -> 443B -0.42053

Excited State 125: 3.000-A 2.7121 eV 457.15 nm f=0.0000 <S\*\*2>=2.000

434A -> 444A 0.12606  
435A -> 443A 0.48051



436A -> 444A -0.40435  
434B -> 444B -0.12607  
435B -> 443B -0.48051  
436B -> 444B 0.40435

Excited State 126: 1.000-A 2.7126 eV 457.07 nm f=0.0001 <S\*\*2>=0.000

429A -> 440A -0.16550  
430A -> 440A 0.26244  
431A -> 439A 0.57082  
433A -> 440A 0.12445  
434A -> 439A 0.10617  
436A -> 441A -0.19184  
429B -> 440B -0.16550  
430B -> 440B 0.26244  
431B -> 439B 0.57081  
433B -> 440B 0.12444  
434B -> 439B 0.10617  
436B -> 441B -0.19184

Excited State 127: 1.000-A 2.7212 eV 455.61 nm f=0.0031 <S\*\*2>=0.000

429A -> 439A -0.22379  
430A -> 439A 0.38875  
431A -> 440A 0.38033  
433A -> 439A 0.10153  
434A -> 440A 0.10013  
435A -> 441A 0.25026  
436A -> 442A 0.22803  
429B -> 439B -0.22379  
430B -> 439B 0.38874  
431B -> 440B 0.38032  
433B -> 439B 0.10153  
434B -> 440B 0.10013  
435B -> 441B 0.25026  
436B -> 442B 0.22803

Excited State 128: 1.000-A 2.7279 eV 454.50 nm f=0.0080 <S\*\*2>=0.000

|              |          |
|--------------|----------|
| 410A -> 437A | -0.18261 |
| 412A -> 438A | 0.12166  |
| 413A -> 437A | 0.19573  |
| 415A -> 438A | -0.14566 |
| 429A -> 439A | 0.11154  |
| 430A -> 439A | -0.20366 |
| 431A -> 440A | -0.20842 |
| 435A -> 441A | 0.35414  |
| 436A -> 442A | 0.33390  |
| 410B -> 437B | -0.18261 |
| 412B -> 438B | 0.12167  |
| 413B -> 437B | 0.19572  |
| 415B -> 438B | -0.14564 |
| 429B -> 439B | 0.11154  |
| 430B -> 439B | -0.20366 |
| 431B -> 440B | -0.20842 |
| 435B -> 441B | 0.35414  |
| 436B -> 442B | 0.33390  |

Excited State 129: 1.000-A 2.7310 eV 453.99 nm f=0.0003 <S\*\*2>=0.000

|              |          |
|--------------|----------|
| 409A -> 438A | 0.10627  |
| 410A -> 437A | -0.25564 |
| 412A -> 438A | 0.21660  |
| 413A -> 437A | 0.32831  |
| 414A -> 437A | -0.13254 |
| 415A -> 438A | -0.30163 |
| 435A -> 441A | -0.23449 |
| 436A -> 442A | -0.21491 |
| 409B -> 438B | 0.10625  |
| 410B -> 437B | -0.25564 |
| 412B -> 438B | 0.21662  |
| 413B -> 437B | 0.32829  |
| 414B -> 437B | -0.13254 |
| 415B -> 438B | -0.30160 |
| 435B -> 441B | -0.23449 |
| 436B -> 442B | -0.21491 |

Excited State 130: 3.000-A 2.7352 eV 453.29 nm f=0.0000 <S\*\*2>=2.000

|              |          |
|--------------|----------|
| 406A -> 437A | -0.17369 |
| 411A -> 437A | 0.37882  |
| 412A -> 437A | -0.50382 |
| 414A -> 438A | 0.10578  |
| 415A -> 437A | -0.13105 |
| 406B -> 437B | 0.17369  |
| 411B -> 437B | -0.37942 |
| 412B -> 437B | 0.50460  |
| 414B -> 438B | -0.10572 |
| 415B -> 437B | 0.13075  |

Excited State 131: 1.000-A 2.7367 eV 453.05 nm f=0.0424 <S\*\*2>=0.000

|              |          |
|--------------|----------|
| 409A -> 437A | 0.32052  |
| 410A -> 438A | -0.26776 |
| 411A -> 437A | -0.21415 |
| 412A -> 437A | 0.29310  |
| 413A -> 438A | 0.34604  |
| 415A -> 437A | -0.17029 |
| 409B -> 437B | 0.32044  |
| 410B -> 438B | -0.26778 |
| 411B -> 437B | -0.21327 |
| 412B -> 437B | 0.29195  |
| 413B -> 438B | 0.34582  |
| 415B -> 437B | -0.17058 |

Excited State 132: 1.000-A 2.7545 eV 450.12 nm f=0.0112 <S\*\*2>=0.000

|              |          |
|--------------|----------|
| 406A -> 437A | -0.17849 |
| 410A -> 438A | -0.17258 |
| 411A -> 437A | 0.39205  |
| 412A -> 437A | -0.34982 |
| 414A -> 438A | 0.22387  |
| 415A -> 437A | -0.26671 |
| 406B -> 437B | -0.17843 |
| 410B -> 438B | -0.17261 |

411B -> 437B 0.39200  
412B -> 437B -0.34966  
414B -> 438B 0.22394  
415B -> 437B -0.26665

Excited State 133: 3.000-A 2.7546 eV 450.09 nm f=0.0000 <S\*\*2>=2.000

411A -> 438A -0.31558  
414A -> 437A -0.50297  
415A -> 438A 0.32525  
411B -> 438B 0.31574  
414B -> 437B 0.50326  
415B -> 438B -0.32545

Excited State 134: 3.000-A 2.7628 eV 448.77 nm f=0.0000 <S\*\*2>=2.000

409A -> 437A 0.12821  
410A -> 438A 0.15029  
411A -> 437A -0.32491  
412A -> 437A -0.26134  
413A -> 438A -0.29501  
414A -> 438A -0.38648  
415A -> 437A 0.12157  
409B -> 437B -0.12829  
410B -> 438B -0.15026  
411B -> 437B 0.32494  
412B -> 437B 0.26146  
413B -> 438B 0.29505  
414B -> 438B 0.38651  
415B -> 437B -0.12149

Excited State 135: 1.000-A 2.7652 eV 448.38 nm f=0.0005 <S\*\*2>=0.000

411A -> 438A 0.28504  
414A -> 437A 0.53586  
415A -> 438A -0.31078  
411B -> 438B 0.28490  
414B -> 437B 0.53563  
415B -> 438B -0.31065

Excited State 136: 3.000-A 2.7721 eV 447.27 nm f=0.0000 <S\*\*2>=2.000

|              |          |
|--------------|----------|
| 404A -> 437A | -0.14279 |
| 406A -> 438A | -0.19527 |
| 411A -> 438A | 0.11519  |
| 412A -> 438A | -0.58579 |
| 413A -> 437A | -0.21768 |
| 404B -> 437B | 0.14283  |
| 406B -> 438B | 0.19531  |
| 411B -> 438B | -0.11517 |
| 412B -> 438B | 0.58588  |
| 413B -> 437B | 0.21766  |

Excited State 137: 1.000-A 2.7787 eV 446.19 nm f=0.0240 <S\*\*2>=0.000

|              |          |
|--------------|----------|
| 406A -> 437A | 0.13964  |
| 409A -> 437A | -0.28789 |
| 411A -> 437A | 0.33384  |
| 412A -> 437A | 0.34055  |
| 413A -> 438A | 0.23040  |
| 414A -> 438A | 0.27446  |
| 415A -> 437A | 0.13737  |
| 406B -> 437B | 0.13961  |
| 409B -> 437B | -0.28786 |
| 411B -> 437B | 0.33378  |
| 412B -> 437B | 0.34047  |
| 413B -> 438B | 0.23035  |
| 414B -> 438B | 0.27435  |
| 415B -> 437B | 0.13739  |

Excited State 138: 1.000-A 2.8029 eV 442.34 nm f=0.0027 <S\*\*2>=0.000

|              |          |
|--------------|----------|
| 404A -> 437A | 0.16215  |
| 406A -> 438A | 0.20465  |
| 410A -> 437A | 0.13141  |
| 411A -> 438A | -0.15410 |
| 412A -> 438A | 0.55788  |
| 414A -> 437A | 0.13745  |

|              |          |
|--------------|----------|
| 415A -> 438A | 0.19257  |
| 404B -> 437B | 0.16212  |
| 406B -> 438B | 0.20464  |
| 410B -> 437B | 0.13147  |
| 411B -> 438B | -0.15422 |
| 412B -> 438B | 0.55780  |
| 414B -> 437B | 0.13752  |
| 415B -> 438B | 0.19250  |

Excited State 139: 3.000-A 2.8083 eV 441.49 nm f=0.0000 <S\*\*2>=2.000

|              |          |
|--------------|----------|
| 409A -> 438A | 0.28712  |
| 410A -> 437A | 0.14588  |
| 411A -> 438A | -0.45353 |
| 413A -> 437A | -0.27597 |
| 414A -> 437A | 0.24929  |
| 415A -> 438A | -0.15422 |
| 409B -> 438B | -0.28724 |
| 410B -> 437B | -0.14584 |
| 411B -> 438B | 0.45365  |
| 413B -> 437B | 0.27605  |
| 414B -> 437B | -0.24928 |
| 415B -> 438B | 0.15435  |

Excited State 140: 3.000-A 2.8110 eV 441.07 nm f=0.0000 <S\*\*2>=2.000

|              |          |
|--------------|----------|
| 406A -> 437A | -0.11727 |
| 409A -> 437A | -0.22840 |
| 411A -> 437A | 0.23304  |
| 413A -> 438A | 0.30992  |
| 414A -> 438A | -0.45297 |
| 415A -> 437A | 0.19274  |
| 406B -> 437B | 0.11735  |
| 409B -> 437B | 0.22847  |
| 411B -> 437B | -0.23312 |
| 413B -> 438B | -0.31007 |
| 414B -> 438B | 0.45327  |
| 415B -> 437B | -0.19280 |

Excited State 141: 3.000-A 2.8210 eV 439.50 nm f=0.0000 <S\*\*2>=2.000

|              |          |
|--------------|----------|
| 429A -> 439A | 0.16507  |
| 429A -> 441A | 0.18959  |
| 431A -> 442A | -0.17818 |
| 432A -> 442A | -0.10810 |
| 433A -> 441A | 0.15605  |
| 433A -> 448A | -0.12085 |
| 434A -> 447A | 0.10174  |
| 435A -> 448A | -0.12241 |
| 436A -> 442A | -0.26632 |
| 436A -> 445A | 0.17480  |
| 436A -> 447A | 0.15482  |
| 429B -> 439B | -0.16507 |
| 429B -> 441B | -0.18959 |
| 431B -> 442B | 0.17818  |
| 432B -> 442B | 0.10810  |
| 433B -> 441B | -0.15605 |
| 433B -> 448B | 0.12085  |
| 434B -> 447B | -0.10174 |
| 435B -> 448B | 0.12241  |
| 436B -> 442B | 0.26632  |
| 436B -> 445B | -0.17480 |
| 436B -> 447B | -0.15482 |

Excited State 142: 1.000-A 2.8211 eV 439.49 nm f=0.0081 <S\*\*2>=0.000

|              |          |
|--------------|----------|
| 406A -> 437A | 0.13604  |
| 409A -> 437A | 0.14668  |
| 410A -> 438A | 0.13633  |
| 411A -> 437A | -0.16787 |
| 413A -> 438A | -0.31094 |
| 414A -> 438A | 0.52201  |
| 415A -> 437A | -0.12068 |
| 406B -> 437B | 0.13597  |
| 409B -> 437B | 0.14656  |
| 410B -> 438B | 0.13628  |

411B -> 437B -0.16775  
413B -> 438B -0.31076  
414B -> 438B 0.52176  
415B -> 437B -0.12057

Excited State 143: 1.000-A 2.8231 eV 439.18 nm f=0.0012 <S\*\*2>=0.000

409A -> 438A -0.31308  
411A -> 438A 0.50329  
413A -> 437A 0.23867  
414A -> 437A -0.13777  
415A -> 438A 0.22782  
409B -> 438B -0.31297  
411B -> 438B 0.50312  
413B -> 437B 0.23857  
414B -> 437B -0.13769  
415B -> 438B 0.22776

Excited State 144: 3.000-A 2.8317 eV 437.84 nm f=0.0000 <S\*\*2>=2.000

429A -> 442A 0.18254  
430A -> 440A 0.15187  
431A -> 441A -0.20978  
431A -> 448A 0.10447  
432A -> 441A -0.11363  
433A -> 447A 0.12115  
434A -> 441A 0.17215  
434A -> 448A -0.10579  
435A -> 442A -0.22046  
435A -> 445A 0.14471  
435A -> 447A 0.13293  
436A -> 441A -0.15828  
436A -> 448A -0.14735  
429B -> 442B -0.18254  
430B -> 440B -0.15187  
431B -> 441B 0.20978  
431B -> 448B -0.10447  
432B -> 441B 0.11363



433B -> 447B -0.12114  
434B -> 441B -0.17215  
434B -> 448B 0.10579  
435B -> 442B 0.22047  
435B -> 445B -0.14471  
435B -> 447B -0.13293  
436B -> 441B 0.15828  
436B -> 448B 0.14735

Excited State 145: 3.000-A 2.8403 eV 436.52 nm f=0.0000 <S\*\*2>=2.000

429A -> 439A -0.31771  
430A -> 439A -0.50949  
431A -> 440A 0.31606  
432A -> 440A -0.14451  
429B -> 439B 0.31774  
430B -> 439B 0.50953  
431B -> 440B -0.31608  
432B -> 440B 0.14452

Excited State 146: 1.000-A 2.8434 eV 436.04 nm f=0.0002 <S\*\*2>=0.000

429A -> 439A 0.32136  
430A -> 439A 0.51172  
431A -> 440A -0.33493  
432A -> 440A 0.13416  
429B -> 439B 0.32134  
430B -> 439B 0.51168  
431B -> 440B -0.33490  
432B -> 440B 0.13415

Excited State 147: 3.000-A 2.8537 eV 434.47 nm f=0.0000 <S\*\*2>=2.000

431A -> 440A 0.11691  
434A -> 442A 0.12020  
435A -> 441A -0.53831  
436A -> 442A 0.34432  
431B -> 440B -0.11691  
434B -> 442B -0.12020

435B -> 441B 0.53831  
436B -> 442B -0.34433

Excited State 148: 1.000-A 2.8582 eV 433.78 nm f=0.0033 <S\*\*2>=0.000

435A -> 441A -0.48050  
436A -> 442A 0.49780  
435B -> 441B -0.48029  
436B -> 442B 0.49769

Excited State 149: 3.000-A 2.8583 eV 433.77 nm f=0.0000 <S\*\*2>=2.000

402A -> 437A 0.18355  
404A -> 437A 0.16239  
406A -> 438A 0.14379  
409A -> 438A -0.26582  
410A -> 437A -0.44104  
411A -> 438A -0.17207  
412A -> 438A -0.11522  
413A -> 437A -0.17390  
415A -> 438A -0.16713  
435A -> 441A -0.11837  
402B -> 437B -0.18358  
404B -> 437B -0.16242  
406B -> 438B -0.14383  
409B -> 438B 0.26594  
410B -> 437B 0.44111  
411B -> 438B 0.17208  
412B -> 438B 0.11522  
413B -> 437B 0.17394  
415B -> 438B 0.16714  
435B -> 441B 0.11914

Excited State 150: 3.000-A 2.8603 eV 433.46 nm f=0.0000 <S\*\*2>=2.000

430A -> 440A -0.24777  
431A -> 439A 0.13342  
433A -> 442A -0.13478  
435A -> 442A -0.43398

|              |          |
|--------------|----------|
| 436A -> 441A | 0.40174  |
| 430B -> 440B | 0.24777  |
| 431B -> 439B | -0.13342 |
| 433B -> 442B | 0.13478  |
| 435B -> 442B | 0.43398  |
| 436B -> 441B | -0.40174 |

Excited State 151: 3.000-A 2.8670 eV 432.45 nm f=0.0000 <S\*\*2>=2.000

|              |          |
|--------------|----------|
| 409A -> 437A | -0.29498 |
| 410A -> 438A | -0.44823 |
| 411A -> 437A | -0.14582 |
| 413A -> 438A | -0.15934 |
| 415A -> 437A | -0.12249 |
| 430A -> 440A | 0.23910  |
| 431A -> 439A | -0.14001 |
| 435A -> 442A | -0.11817 |
| 409B -> 437B | 0.29509  |
| 410B -> 438B | 0.44839  |
| 411B -> 437B | 0.14587  |
| 413B -> 438B | 0.15940  |
| 415B -> 437B | 0.12252  |
| 430B -> 440B | -0.23911 |
| 431B -> 439B | 0.14002  |
| 435B -> 442B | 0.11818  |

Excited State 152: 3.000-A 2.8695 eV 432.07 nm f=0.0000 <S\*\*2>=2.000

|              |          |
|--------------|----------|
| 409A -> 437A | -0.17077 |
| 410A -> 438A | -0.22958 |
| 430A -> 440A | -0.45395 |
| 431A -> 439A | 0.26269  |
| 435A -> 442A | 0.12542  |
| 436A -> 441A | -0.20269 |
| 409B -> 437B | 0.17085  |
| 410B -> 438B | 0.22970  |
| 430B -> 440B | 0.45395  |
| 431B -> 439B | -0.26269 |

435B -> 442B -0.12541  
436B -> 441B 0.20268

Excited State 153: 1.000-A 2.8700 eV 432.00 nm f=0.0005 <S\*\*2>=0.000  
430A -> 440A 0.62991  
431A -> 439A -0.30491  
430B -> 440B 0.62991  
431B -> 439B -0.30491

Excited State 154: 1.000-A 2.8750 eV 431.25 nm f=0.0027 <S\*\*2>=0.000  
402A -> 437A -0.10338  
404A -> 437A -0.11068  
406A -> 438A -0.17216  
409A -> 438A 0.44709  
410A -> 437A 0.42195  
411A -> 438A 0.16568  
413A -> 437A 0.15790  
402B -> 437B -0.10334  
404B -> 437B -0.11064  
406B -> 438B -0.17212  
409B -> 438B 0.44703  
410B -> 437B 0.42184  
411B -> 438B 0.16564  
413B -> 437B 0.15786

Excited State 155: 1.000-A 2.8767 eV 431.00 nm f=0.0000 <S\*\*2>=0.000  
409A -> 437A 0.36814  
410A -> 438A 0.51208  
411A -> 437A 0.17489  
413A -> 438A 0.18295  
409B -> 437B 0.36802  
410B -> 438B 0.51190  
411B -> 437B 0.17483  
413B -> 438B 0.18289

Excited State 156: 3.000-A 2.8804 eV 430.44 nm f=0.0000 <S\*\*2>=2.000

|              |          |
|--------------|----------|
| 391A -> 439A | 0.11699  |
| 429A -> 439A | -0.47898 |
| 430A -> 439A | 0.10383  |
| 431A -> 440A | -0.38327 |
| 435A -> 441A | -0.11309 |
| 391B -> 439B | -0.11698 |
| 429B -> 439B | 0.48968  |
| 430B -> 439B | -0.10574 |
| 431B -> 440B | 0.39113  |
| 435B -> 441B | 0.11319  |

Excited State 157: 1.000-A 2.8804 eV 430.44 nm f=0.0004 <S\*\*2>=0.000

|              |         |
|--------------|---------|
| 429A -> 439A | 0.55954 |
| 431A -> 440A | 0.41063 |
| 429B -> 439B | 0.55018 |
| 431B -> 440B | 0.40317 |

Excited State 158: 1.000-A 2.8847 eV 429.80 nm f=0.0005 <S\*\*2>=0.000

|              |          |
|--------------|----------|
| 433A -> 442A | 0.11705  |
| 435A -> 442A | 0.62564  |
| 436A -> 441A | -0.27413 |
| 433B -> 442B | 0.11705  |
| 435B -> 442B | 0.62564  |
| 436B -> 441B | -0.27412 |

Excited State 159: 3.000-A 2.9028 eV 427.12 nm f=0.0000 <S\*\*2>=2.000

|              |          |
|--------------|----------|
| 390A -> 439A | 0.28893  |
| 391A -> 440A | 0.31514  |
| 401A -> 439A | 0.10608  |
| 429A -> 440A | -0.39357 |
| 430A -> 440A | -0.22530 |
| 390B -> 439B | -0.28893 |
| 391B -> 440B | -0.31514 |
| 401B -> 439B | -0.10608 |
| 429B -> 440B | 0.39360  |
| 430B -> 440B | 0.22531  |

Excited State 160: 3.000-A 2.9089 eV 426.22 nm f=0.0000 <S\*\*2>=2.000

|              |          |
|--------------|----------|
| 394A -> 438A | -0.11834 |
| 396A -> 437A | 0.12082  |
| 401A -> 437A | 0.10275  |
| 402A -> 437A | -0.34079 |
| 404A -> 437A | -0.16441 |
| 405A -> 437A | 0.31172  |
| 406A -> 438A | -0.12237 |
| 409A -> 438A | -0.34937 |
| 411A -> 438A | -0.13642 |
| 394B -> 438B | 0.11835  |
| 396B -> 437B | -0.12080 |
| 401B -> 437B | -0.10278 |
| 402B -> 437B | 0.34086  |
| 404B -> 437B | 0.16443  |
| 405B -> 437B | -0.31180 |
| 406B -> 438B | 0.12241  |
| 409B -> 438B | 0.34941  |
| 411B -> 438B | 0.13644  |

Excited State 161: 3.000-A 2.9096 eV 426.13 nm f=0.0000 <S\*\*2>=2.000

|              |          |
|--------------|----------|
| 390A -> 440A | -0.36152 |
| 391A -> 439A | -0.41167 |
| 392A -> 440A | -0.11541 |
| 400A -> 439A | -0.12743 |
| 401A -> 440A | -0.11398 |
| 429A -> 439A | -0.18343 |
| 390B -> 440B | 0.36152  |
| 391B -> 439B | 0.41167  |
| 392B -> 440B | 0.11541  |
| 400B -> 439B | 0.12743  |
| 401B -> 440B | 0.11398  |
| 429B -> 439B | 0.18342  |

Excited State 162: 3.000-A 2.9125 eV 425.69 nm f=0.0000 <S\*\*2>=2.000

|              |          |
|--------------|----------|
| 394A -> 437A | -0.13090 |
| 396A -> 438A | 0.10314  |
| 400A -> 437A | 0.12093  |
| 402A -> 438A | -0.30073 |
| 404A -> 438A | -0.13366 |
| 405A -> 438A | 0.26613  |
| 406A -> 437A | -0.33621 |
| 409A -> 437A | -0.26862 |
| 411A -> 437A | -0.12992 |
| 414A -> 438A | 0.10521  |
| 394B -> 437B | 0.13091  |
| 396B -> 438B | -0.10313 |
| 400B -> 437B | -0.12096 |
| 402B -> 438B | 0.30078  |
| 404B -> 438B | 0.13367  |
| 405B -> 438B | -0.26618 |
| 406B -> 437B | 0.33629  |
| 409B -> 437B | 0.26865  |
| 411B -> 437B | 0.12994  |
| 414B -> 438B | -0.10522 |

Excited State 163: 1.000-A 2.9187 eV 424.79 nm f=0.0001 <S\*\*2>=0.000

|              |         |
|--------------|---------|
| 429A -> 440A | 0.67006 |
| 430A -> 440A | 0.10592 |
| 431A -> 439A | 0.15211 |
| 429B -> 440B | 0.67014 |
| 430B -> 440B | 0.10591 |
| 431B -> 439B | 0.15213 |

Excited State 164: 3.000-A 2.9239 eV 424.04 nm f=0.0000 <S\*\*2>=2.000

|              |          |
|--------------|----------|
| 390A -> 439A | 0.24254  |
| 391A -> 440A | 0.26059  |
| 429A -> 440A | 0.53597  |
| 431A -> 439A | 0.12015  |
| 390B -> 439B | -0.24254 |
| 391B -> 440B | -0.26059 |

429B -> 440B -0.53585  
431B -> 439B -0.12012

Excited State 165: 1.000-A 2.9299 eV 423.17 nm f=0.0049 <S\*\*2>=0.000

396A -> 437A -0.23175  
397A -> 438A -0.24384  
401A -> 437A 0.19459  
402A -> 437A -0.24313  
405A -> 437A 0.36258  
406A -> 438A -0.16900  
409A -> 438A -0.11893  
435A -> 444A -0.11674  
436A -> 443A 0.20138  
396B -> 437B -0.23176  
397B -> 438B -0.24383  
401B -> 437B 0.19461  
402B -> 437B -0.24307  
405B -> 437B 0.36256  
406B -> 438B -0.16900  
409B -> 438B -0.11886  
435B -> 444B -0.11674  
436B -> 443B 0.20139

Excited State 166: 1.000-A 2.9404 eV 421.66 nm f=0.0515 <S\*\*2>=0.000

396A -> 438A 0.15402  
397A -> 437A 0.24482  
401A -> 438A -0.13769  
402A -> 438A 0.21080  
405A -> 438A -0.27359  
406A -> 437A 0.39444  
409A -> 437A 0.16367  
412A -> 437A -0.10365  
435A -> 443A -0.13273  
436A -> 444A 0.11342  
396B -> 438B 0.15404  
397B -> 437B 0.24482



|              |          |
|--------------|----------|
| 401B -> 438B | -0.13769 |
| 402B -> 438B | 0.21074  |
| 405B -> 438B | -0.27355 |
| 406B -> 437B | 0.39440  |
| 409B -> 437B | 0.16363  |
| 412B -> 437B | -0.10364 |
| 435B -> 443B | -0.13273 |
| 436B -> 444B | 0.11343  |

Excited State 167: 1.000-A 2.9566 eV 419.35 nm f=0.0011 <S\*\*2>=0.000

|              |          |
|--------------|----------|
| 396A -> 437A | -0.21629 |
| 397A -> 438A | -0.12282 |
| 402A -> 437A | 0.30163  |
| 404A -> 437A | 0.28480  |
| 405A -> 437A | -0.19360 |
| 406A -> 438A | 0.14339  |
| 409A -> 438A | 0.19382  |
| 411A -> 438A | 0.12812  |
| 435A -> 444A | -0.14833 |
| 436A -> 443A | 0.27197  |
| 396B -> 437B | -0.21621 |
| 397B -> 438B | -0.12271 |
| 402B -> 437B | 0.30185  |
| 404B -> 437B | 0.28623  |
| 405B -> 437B | -0.19270 |
| 406B -> 438B | 0.14253  |
| 409B -> 438B | 0.19415  |
| 411B -> 438B | 0.12831  |
| 435B -> 444B | -0.14835 |
| 436B -> 443B | 0.27202  |

Excited State 168: 3.000-A 2.9570 eV 419.29 nm f=0.0000 <S\*\*2>=2.000

|              |          |
|--------------|----------|
| 401A -> 437A | 0.23010  |
| 404A -> 437A | 0.44978  |
| 405A -> 437A | 0.26761  |
| 406A -> 438A | -0.26294 |

|              |          |
|--------------|----------|
| 409A -> 438A | 0.10917  |
| 414A -> 437A | -0.11181 |
| 415A -> 438A | -0.13968 |
| 401B -> 437B | -0.23013 |
| 404B -> 437B | -0.44891 |
| 405B -> 437B | -0.26822 |
| 406B -> 438B | 0.26341  |
| 409B -> 438B | -0.10857 |
| 414B -> 437B | 0.11168  |
| 415B -> 438B | 0.13964  |

Excited State 169: 1.000-A 2.9658 eV 418.04 nm f=0.0845 <S\*\*2>=0.000

|              |          |
|--------------|----------|
| 396A -> 438A | -0.25927 |
| 397A -> 437A | -0.28841 |
| 399A -> 437A | 0.13942  |
| 400A -> 437A | -0.10796 |
| 406A -> 437A | 0.31977  |
| 411A -> 437A | 0.10234  |
| 414A -> 438A | -0.10508 |
| 435A -> 443A | 0.26090  |
| 436A -> 444A | -0.23875 |
| 396B -> 438B | -0.25925 |
| 397B -> 437B | -0.28841 |
| 399B -> 437B | 0.13942  |
| 400B -> 437B | -0.10795 |
| 406B -> 437B | 0.31976  |
| 411B -> 437B | 0.10234  |
| 414B -> 438B | -0.10508 |
| 435B -> 443B | 0.26090  |
| 436B -> 444B | -0.23875 |

Excited State 170: 3.000-A 2.9746 eV 416.81 nm f=0.0000 <S\*\*2>=2.000

|              |          |
|--------------|----------|
| 394A -> 437A | -0.12389 |
| 401A -> 438A | -0.14602 |
| 402A -> 438A | -0.21734 |
| 403A -> 437A | 0.10601  |

|              |          |
|--------------|----------|
| 404A -> 438A | -0.44666 |
| 406A -> 437A | 0.32842  |
| 435A -> 442A | 0.11123  |
| 394B -> 437B | 0.12390  |
| 401B -> 438B | 0.14603  |
| 402B -> 438B | 0.21739  |
| 403B -> 437B | -0.10601 |
| 404B -> 438B | 0.44672  |
| 406B -> 437B | -0.32840 |
| 435B -> 442B | -0.11123 |

Excited State 171: 1.000-A 2.9907 eV 414.57 nm f=0.0048 <S\*\*2>=0.000

|              |          |
|--------------|----------|
| 396A -> 437A | 0.14297  |
| 397A -> 438A | 0.13806  |
| 401A -> 437A | 0.16921  |
| 402A -> 437A | 0.17333  |
| 404A -> 437A | 0.45587  |
| 405A -> 437A | 0.16880  |
| 406A -> 438A | -0.21598 |
| 435A -> 444A | 0.11767  |
| 436A -> 443A | -0.22995 |
| 396B -> 437B | 0.14298  |
| 397B -> 438B | 0.13808  |
| 401B -> 437B | 0.16922  |
| 402B -> 437B | 0.17332  |
| 404B -> 437B | 0.45586  |
| 405B -> 437B | 0.16883  |
| 406B -> 438B | -0.21598 |
| 435B -> 444B | 0.11779  |
| 436B -> 443B | -0.22993 |

Excited State 172: 3.000-A 2.9911 eV 414.51 nm f=0.0000 <S\*\*2>=2.000

|              |          |
|--------------|----------|
| 429A -> 441A | 0.13891  |
| 431A -> 442A | -0.13959 |
| 433A -> 441A | 0.17388  |
| 433A -> 448A | 0.11339  |

|              |          |
|--------------|----------|
| 434A -> 442A | 0.15850  |
| 434A -> 443A | -0.15096 |
| 435A -> 441A | -0.10553 |
| 435A -> 444A | -0.11088 |
| 435A -> 448A | 0.12367  |
| 436A -> 442A | -0.32445 |
| 436A -> 445A | -0.16353 |
| 436A -> 447A | -0.15943 |
| 429B -> 441B | -0.13891 |
| 431B -> 442B | 0.13959  |
| 433B -> 441B | -0.17389 |
| 433B -> 448B | -0.11340 |
| 434B -> 442B | -0.15850 |
| 434B -> 443B | 0.15099  |
| 435B -> 441B | 0.10553  |
| 435B -> 444B | 0.11076  |
| 435B -> 448B | -0.12368 |
| 436B -> 442B | 0.32448  |
| 436B -> 445B | 0.16355  |
| 436B -> 447B | 0.15945  |

Excited State 173: 3.000-A 2.9969 eV 413.70 nm f=0.0000 <S\*\*2>=2.000

|              |          |
|--------------|----------|
| 404A -> 438A | -0.15182 |
| 406A -> 437A | 0.11540  |
| 431A -> 441A | -0.12165 |
| 431A -> 448A | -0.11506 |
| 433A -> 442A | 0.11085  |
| 433A -> 443A | -0.11062 |
| 433A -> 445A | -0.11196 |
| 433A -> 447A | -0.11550 |
| 434A -> 441A | 0.18801  |
| 434A -> 448A | 0.10987  |
| 435A -> 442A | -0.32394 |
| 435A -> 445A | -0.14053 |
| 435A -> 447A | -0.14606 |
| 436A -> 448A | 0.15945  |

|              |          |
|--------------|----------|
| 404B -> 438B | 0.15185  |
| 406B -> 437B | -0.11541 |
| 431B -> 441B | 0.12165  |
| 431B -> 448B | 0.11506  |
| 433B -> 442B | -0.11085 |
| 433B -> 443B | 0.11062  |
| 433B -> 445B | 0.11196  |
| 433B -> 447B | 0.11550  |
| 434B -> 441B | -0.18801 |
| 434B -> 448B | -0.10987 |
| 435B -> 442B | 0.32394  |
| 435B -> 445B | 0.14053  |
| 435B -> 447B | 0.14606  |
| 436B -> 448B | -0.15945 |

Excited State 174: 1.000-A 3.0231 eV 410.12 nm f=0.0007 <S\*\*2>=0.000

|              |          |
|--------------|----------|
| 401A -> 438A | 0.11631  |
| 402A -> 438A | 0.34537  |
| 404A -> 438A | 0.53815  |
| 406A -> 437A | -0.17887 |
| 401B -> 438B | 0.11629  |
| 402B -> 438B | 0.34534  |
| 404B -> 438B | 0.53809  |
| 406B -> 437B | -0.17884 |

Excited State 175: 3.000-A 3.0291 eV 409.32 nm f=0.0000 <S\*\*2>=2.000

|              |          |
|--------------|----------|
| 427A -> 440A | 0.16061  |
| 428A -> 439A | 0.67164  |
| 427B -> 440B | -0.16061 |
| 428B -> 439B | -0.67163 |

Excited State 176: 3.000-A 3.0309 eV 409.07 nm f=0.0000 <S\*\*2>=2.000

|              |          |
|--------------|----------|
| 401A -> 438A | -0.22805 |
| 402A -> 438A | 0.18399  |
| 404A -> 438A | -0.15865 |
| 405A -> 438A | -0.39187 |

|              |          |
|--------------|----------|
| 406A -> 437A | -0.29485 |
| 409A -> 437A | -0.11167 |
| 412A -> 437A | 0.12572  |
| 414A -> 438A | 0.19713  |
| 401B -> 438B | 0.22811  |
| 402B -> 438B | -0.18404 |
| 404B -> 438B | 0.15869  |
| 405B -> 438B | 0.39198  |
| 406B -> 437B | 0.29490  |
| 409B -> 437B | 0.11169  |
| 412B -> 437B | -0.12574 |
| 414B -> 438B | -0.19717 |

Excited State 177: 3.000-A 3.0341 eV 408.64 nm f=0.0000 <S\*\*2>=2.000

|              |          |
|--------------|----------|
| 400A -> 438A | 0.12646  |
| 401A -> 437A | -0.11526 |
| 402A -> 437A | 0.14881  |
| 403A -> 438A | -0.11769 |
| 405A -> 437A | -0.25752 |
| 406A -> 438A | -0.48750 |
| 409A -> 438A | -0.16515 |
| 411A -> 438A | -0.11526 |
| 412A -> 438A | 0.16569  |
| 414A -> 437A | 0.13855  |
| 400B -> 438B | -0.12652 |
| 401B -> 437B | 0.11532  |
| 402B -> 437B | -0.14888 |
| 403B -> 438B | 0.11775  |
| 405B -> 437B | 0.25766  |
| 406B -> 438B | 0.48777  |
| 409B -> 438B | 0.16523  |
| 411B -> 438B | 0.11533  |
| 412B -> 438B | -0.16577 |
| 414B -> 437B | -0.13862 |

Excited State 178: 1.000-A 3.0343 eV 408.61 nm f=0.0001 <S\*\*2>=0.000

|              |         |
|--------------|---------|
| 407A -> 440A | 0.23714 |
| 408A -> 439A | 0.25073 |
| 427A -> 440A | 0.13117 |
| 428A -> 439A | 0.59119 |
| 407B -> 440B | 0.23714 |
| 408B -> 439B | 0.25073 |
| 427B -> 440B | 0.13118 |
| 428B -> 439B | 0.59121 |

Excited State 179: 1.000-A 3.0439 eV 407.33 nm f=0.0052 <S\*\*2>=0.000

|              |          |
|--------------|----------|
| 400A -> 438A | -0.12492 |
| 401A -> 437A | 0.10548  |
| 402A -> 437A | -0.13840 |
| 403A -> 438A | 0.11686  |
| 405A -> 437A | 0.24237  |
| 406A -> 438A | 0.50883  |
| 409A -> 438A | 0.14159  |
| 411A -> 438A | 0.13253  |
| 412A -> 438A | -0.13701 |
| 414A -> 437A | -0.13156 |
| 436A -> 443A | -0.14125 |
| 400B -> 438B | -0.12486 |
| 401B -> 437B | 0.10542  |
| 402B -> 437B | -0.13832 |
| 403B -> 438B | 0.11679  |
| 405B -> 437B | 0.24223  |
| 406B -> 438B | 0.50857  |
| 409B -> 438B | 0.14150  |
| 411B -> 438B | 0.13247  |
| 412B -> 438B | -0.13692 |
| 414B -> 437B | -0.13149 |
| 436B -> 443B | -0.14124 |

Excited State 180: 1.000-A 3.0447 eV 407.21 nm f=0.0000 <S\*\*2>=0.000

|              |         |
|--------------|---------|
| 407A -> 439A | 0.49298 |
| 408A -> 440A | 0.46961 |

428A -> 440A 0.10455  
407B -> 439B 0.49298  
408B -> 440B 0.46961  
428B -> 440B 0.10455

Excited State 181: 1.000-A 3.0487 eV 406.67 nm f=0.0000 <S\*\*2>=0.000

407A -> 440A 0.41422  
408A -> 439A 0.43316  
428A -> 439A -0.34721  
407B -> 440B 0.41422  
408B -> 439B 0.43316  
428B -> 439B -0.34721

Excited State 182: 1.000-A 3.0494 eV 406.58 nm f=0.0013 <S\*\*2>=0.000

401A -> 438A 0.22473  
402A -> 438A -0.20511  
404A -> 438A 0.14687  
405A -> 438A 0.42841  
406A -> 437A 0.24885  
414A -> 438A -0.17516  
435A -> 443A -0.15478  
436A -> 444A 0.13867  
401B -> 438B 0.22467  
402B -> 438B -0.20506  
404B -> 438B 0.14683  
405B -> 438B 0.42831  
406B -> 437B 0.24877  
414B -> 438B -0.17511  
435B -> 443B -0.15478  
436B -> 444B 0.13867

Excited State 183: 3.000-A 3.0666 eV 404.30 nm f=0.0000 <S\*\*2>=2.000

405A -> 437A -0.10402  
431A -> 443A -0.10090  
433A -> 441A -0.10354  
433A -> 444A 0.24264



|              |          |
|--------------|----------|
| 434A -> 443A | -0.30439 |
| 435A -> 444A | -0.12705 |
| 435A -> 450A | -0.17742 |
| 436A -> 443A | -0.18858 |
| 436A -> 449A | -0.22801 |
| 405B -> 437B | 0.10402  |
| 431B -> 443B | 0.10090  |
| 433B -> 441B | 0.10354  |
| 433B -> 444B | -0.24264 |
| 434B -> 443B | 0.30439  |
| 435B -> 444B | 0.12705  |
| 435B -> 450B | 0.17742  |
| 436B -> 443B | 0.18859  |
| 436B -> 449B | 0.22801  |

Excited State 184: 3.000-A 3.0724 eV 403.54 nm f=0.0000 <S\*\*2>=2.000

|              |          |
|--------------|----------|
| 427A -> 439A | 0.31177  |
| 428A -> 440A | 0.61127  |
| 427B -> 439B | -0.31177 |
| 428B -> 440B | -0.61127 |

Excited State 185: 3.000-A 3.0810 eV 402.42 nm f=0.0000 <S\*\*2>=2.000

|              |          |
|--------------|----------|
| 393A -> 437A | 0.10772  |
| 405A -> 438A | -0.14353 |
| 408A -> 437A | 0.23646  |
| 430A -> 443A | -0.12141 |
| 433A -> 443A | -0.25469 |
| 434A -> 444A | 0.24504  |
| 435A -> 449A | -0.25847 |
| 436A -> 450A | -0.21759 |
| 393B -> 437B | -0.10773 |
| 405B -> 438B | 0.14351  |
| 408B -> 437B | -0.23673 |
| 430B -> 443B | 0.12141  |
| 433B -> 443B | 0.25469  |
| 434B -> 444B | -0.24505 |

|                                                                      |          |
|----------------------------------------------------------------------|----------|
| 435B -> 449B                                                         | 0.25848  |
| 436B -> 450B                                                         | 0.21759  |
| Excited State 186: 1.000-A 3.0849 eV 401.90 nm f=0.0005 <S**2>=0.000 |          |
| 427A -> 439A                                                         | 0.27970  |
| 428A -> 440A                                                         | 0.62869  |
| 427B -> 439B                                                         | 0.27970  |
| 428B -> 440B                                                         | 0.62867  |
| Excited State 187: 1.000-A 3.0856 eV 401.82 nm f=0.0001 <S**2>=0.000 |          |
| 408A -> 437A                                                         | 0.68283  |
| 408B -> 437B                                                         | 0.68989  |
| Excited State 188: 3.000-A 3.0860 eV 401.76 nm f=0.0000 <S**2>=2.000 |          |
| 408A -> 437A                                                         | 0.65232  |
| 408B -> 437B                                                         | -0.64473 |
| Excited State 189: 1.000-A 3.1080 eV 398.92 nm f=0.0140 <S**2>=0.000 |          |
| 396A -> 437A                                                         | -0.12245 |
| 407A -> 437A                                                         | 0.59929  |
| 408A -> 438A                                                         | 0.21531  |
| 436A -> 443A                                                         | -0.18917 |
| 396B -> 437B                                                         | -0.12238 |
| 407B -> 437B                                                         | 0.60173  |
| 408B -> 438B                                                         | 0.21615  |
| 436B -> 443B                                                         | -0.18912 |
| Excited State 190: 3.000-A 3.1093 eV 398.76 nm f=0.0000 <S**2>=2.000 |          |
| 407A -> 437A                                                         | 0.65696  |
| 408A -> 438A                                                         | 0.22751  |
| 407B -> 437B                                                         | -0.65484 |
| 408B -> 438B                                                         | -0.22673 |
| Excited State 191: 1.000-A 3.1149 eV 398.04 nm f=0.0561 <S**2>=0.000 |          |
| 396A -> 437A                                                         | 0.27225  |
| 397A -> 438A                                                         | 0.19848  |

|              |         |
|--------------|---------|
| 405A -> 437A | 0.24632 |
| 407A -> 437A | 0.26829 |
| 436A -> 443A | 0.36742 |
| 396B -> 437B | 0.27224 |
| 397B -> 438B | 0.19848 |
| 405B -> 437B | 0.24628 |
| 407B -> 437B | 0.26801 |
| 436B -> 443B | 0.36742 |

Excited State 192: 3.000-A 3.1259 eV 396.63 nm f=0.0000 <S\*\*2>=2.000

|              |          |
|--------------|----------|
| 392A -> 437A | 0.10588  |
| 393A -> 438A | 0.13517  |
| 433A -> 450A | 0.11281  |
| 434A -> 449A | 0.14822  |
| 435A -> 444A | 0.27479  |
| 435A -> 450A | -0.24470 |
| 436A -> 443A | 0.35484  |
| 436A -> 449A | -0.20869 |
| 392B -> 437B | -0.10589 |
| 393B -> 438B | -0.13518 |
| 433B -> 450B | -0.11281 |
| 434B -> 449B | -0.14822 |
| 435B -> 444B | -0.27478 |
| 435B -> 450B | 0.24470  |
| 436B -> 443B | -0.35483 |
| 436B -> 449B | 0.20869  |

Excited State 193: 3.000-A 3.1374 eV 395.18 nm f=0.0000 <S\*\*2>=2.000

|              |          |
|--------------|----------|
| 393A -> 437A | -0.13417 |
| 433A -> 443A | -0.16321 |
| 434A -> 444A | 0.15372  |
| 435A -> 443A | 0.28967  |
| 435A -> 449A | 0.11914  |
| 436A -> 444A | 0.48230  |
| 393B -> 437B | 0.13417  |
| 433B -> 443B | 0.16321  |

434B -> 444B -0.15372  
435B -> 443B -0.28965  
435B -> 449B -0.11913  
436B -> 444B -0.48228

Excited State 194: 3.000-A 3.1433 eV 394.44 nm f=0.0000 <S\*\*2>=2.000

402A -> 437A 0.32907  
403A -> 438A 0.19926  
404A -> 437A -0.17448  
405A -> 437A 0.28751  
407A -> 437A 0.13242  
408A -> 438A -0.44003  
402B -> 437B -0.33008  
403B -> 438B -0.19986  
404B -> 437B 0.17503  
405B -> 437B -0.28830  
407B -> 437B -0.13291  
408B -> 438B 0.44164

Excited State 195: 1.000-A 3.1447 eV 394.26 nm f=0.0018 <S\*\*2>=0.000

402A -> 437A -0.29377  
403A -> 438A -0.17867  
404A -> 437A 0.16128  
405A -> 437A -0.23395  
407A -> 437A -0.15164  
408A -> 438A 0.49270  
402B -> 437B -0.29267  
403B -> 438B -0.17800  
404B -> 437B 0.16069  
405B -> 437B -0.23299  
407B -> 437B -0.15121  
408B -> 438B 0.49125

Excited State 196: 3.000-A 3.1487 eV 393.76 nm f=0.0000 <S\*\*2>=2.000

402A -> 438A -0.19041  
403A -> 437A -0.61971

405A -> 438A -0.16287  
406A -> 437A 0.15133  
402B -> 438B 0.19208  
403B -> 437B 0.62540  
405B -> 438B 0.16450  
406B -> 437B -0.15263

Excited State 197: 1.000-A 3.1493 eV 393.69 nm f=0.0011 <S\*\*2>=0.000

402A -> 438A 0.18471  
403A -> 437A 0.62596  
405A -> 438A 0.17955  
406A -> 437A -0.14261  
402B -> 438B 0.18297  
403B -> 437B 0.62030  
405B -> 438B 0.17805  
406B -> 437B -0.14122

Excited State 198: 3.000-A 3.1523 eV 393.31 nm f=0.0000 <S\*\*2>=2.000

402A -> 437A -0.31174  
403A -> 438A -0.12150  
404A -> 437A 0.18289  
405A -> 437A -0.24884  
407A -> 437A 0.17828  
408A -> 438A -0.48247  
402B -> 437B 0.31315  
403B -> 438B 0.12208  
404B -> 437B -0.18364  
405B -> 437B 0.24983  
407B -> 437B -0.17896  
408B -> 438B 0.48421

Excited State 199: 1.000-A 3.1535 eV 393.16 nm f=0.0012 <S\*\*2>=0.000

402A -> 437A 0.35698  
403A -> 438A 0.14650  
404A -> 437A -0.18887  
405A -> 437A 0.25182



|    |          |          |          |   |          |          |          |
|----|----------|----------|----------|---|----------|----------|----------|
| C  | -7.60692 | 2.724084 | -0.62709 | C | 0.224741 | -4.32827 | -4.50899 |
| C  | -6.3655  | 2.233793 | -0.46841 | C | -1.03565 | -4.31261 | -3.89988 |
| O  | -9.2098  | 4.41254  | -0.11029 | C | -1.19816 | -3.76552 | -2.62028 |
| C  | -3.15858 | 0.71644  | 2.639935 | C | -0.11165 | -3.22122 | -1.91484 |
| C  | -4.03974 | 0.274479 | 3.636962 | C | 5.651825 | -2.90308 | -3.20874 |
| C  | -5.39077 | 0.648528 | 3.635821 | C | 6.540142 | -3.52179 | -4.094   |
| C  | -5.89273 | 1.481418 | 2.622198 | C | 6.364552 | -4.8647  | -4.44635 |
| C  | -3.4189  | 3.737601 | -1.15262 | C | 5.293774 | -5.58899 | -3.90773 |
| C  | -2.06144 | 3.450498 | -1.07863 | C | 4.410166 | -4.97731 | -3.01495 |
| N  | -1.83325 | 2.494998 | -0.05882 | N | 4.563354 | 1.764254 | 0.840705 |
| C  | -4.18596 | 4.679142 | -1.99541 | C | 3.514047 | 1.671762 | -0.07168 |
| C  | -0.87801 | 3.993222 | -1.71747 | C | 3.834066 | 1.430083 | -1.45388 |
| C  | -0.8969  | 4.912293 | -2.78148 | C | 2.938454 | 0.777933 | -2.33135 |
| C  | 0.297138 | 5.452446 | -3.25996 | C | 3.340139 | 0.362647 | -3.58919 |
| C  | 1.51028  | 5.080454 | -2.66728 | C | 4.665149 | 0.586588 | -4.02625 |
| C  | 1.530739 | 4.148548 | -1.62348 | C | 5.554088 | 1.264065 | -3.21046 |
| C  | 0.350098 | 3.5598   | -1.14205 | C | 4.051867 | 2.234765 | 1.990602 |
| C  | -5.06547 | 4.207908 | -2.98796 | C | 2.62114  | 2.383985 | 1.822468 |
| C  | -5.80018 | 5.106876 | -3.76753 | N | 2.299158 | 1.953665 | 0.541675 |
| C  | -5.66044 | 6.485595 | -3.57183 | C | 4.940065 | 2.517135 | 3.131332 |
| C  | -4.7797  | 6.964553 | -2.59418 | C | 1.561981 | 2.951025 | 2.597745 |
| C  | -4.04893 | 6.06877  | -1.80906 | C | 1.666899 | 3.391853 | 3.940089 |
| Cl | -0.23367 | 0.150683 | -1.64771 | C | 0.616779 | 4.078696 | 4.530635 |
| Cl | -0.07315 | -0.1901  | 1.645214 | C | -0.54994 | 4.349404 | 3.786322 |
| Ir | 0.199534 | 2.054527 | 0.196971 | C | -0.69014 | 3.872563 | 2.484024 |
| N  | 4.078316 | -2.50568 | -0.44468 | C | 0.329979 | 3.114322 | 1.87092  |
| C  | 2.980302 | -2.11671 | 0.300106 | C | 5.936577 | 1.584482 | 3.479209 |
| C  | 3.402731 | -1.93055 | 1.685458 | C | 6.840813 | 1.85919  | 4.507153 |
| C  | 4.78661  | -2.22455 | 1.741956 | C | 6.778288 | 3.076663 | 5.196405 |
| C  | 5.350333 | -2.54587 | 0.335962 | C | 5.808487 | 4.021714 | 4.842845 |
| C  | 5.972867 | -3.92338 | 0.300919 | C | 4.898194 | 3.747094 | 3.818223 |
| C  | 7.285289 | -4.12063 | 0.090191 | H | -6.32787 | -0.72929 | 0.93335  |
| C  | 8.20734  | -3.00445 | -0.20033 | H | -8.70756 | -1.39037 | 1.214485 |
| C  | 7.616381 | -1.65444 | -0.26242 | H | -8.05436 | -4.90717 | -1.25803 |
| C  | 6.305202 | -1.43542 | -0.05818 | H | -5.67434 | -4.26187 | -1.57455 |
| O  | 9.430346 | -3.19758 | -0.39113 | H | -2.31052 | -0.28741 | -2.69191 |
| C  | 2.70784  | -1.64486 | 2.865197 | H | -3.75358 | 0.636971 | -4.48439 |
| C  | 3.412547 | -1.64436 | 4.075935 | H | -6.20676 | 0.246793 | -4.47154 |
| C  | 4.783746 | -1.92858 | 4.121661 | H | -7.24755 | -1.10958 | -2.65113 |
| C  | 5.485258 | -2.2202  | 2.941743 | H | -2.55518 | -5.05445 | 3.198656 |
| C  | 3.65767  | -3.00433 | -1.68133 | H | -0.57763 | -6.32823 | 3.971163 |
| C  | 2.271775 | -2.86508 | -1.66809 | H | 1.618504 | -6.00041 | 2.837295 |
| N  | 1.873537 | -2.28671 | -0.44094 | H | 1.854959 | -4.35273 | 1.035008 |
| C  | 4.57849  | -3.6249  | -2.65358 | H | -5.62912 | -2.62051 | 3.136676 |
| C  | 1.178637 | -3.30738 | -2.52212 | H | -7.11608 | -4.05732 | 4.511643 |
| C  | 1.331228 | -3.82991 | -3.81791 | H | -7.14651 | -6.51842 | 4.156668 |

|   |          |          |          |   |          |          |          |
|---|----------|----------|----------|---|----------|----------|----------|
| H | -5.68466 | -7.5365  | 2.418609 | H | 5.78326  | -1.85876 | -2.95161 |
| H | -4.21151 | -6.09579 | 1.034374 | H | 7.366804 | -2.95471 | -4.50987 |
| H | -5.04183 | 4.760274 | 1.563791 | H | 7.055113 | -5.34258 | -5.13369 |
| H | -7.3401  | 5.649577 | 1.237064 | H | 5.151919 | -6.6312  | -4.17521 |
| H | -8.33753 | 2.231135 | -1.25935 | H | 3.585361 | -5.54124 | -2.5922  |
| H | -6.04194 | 1.326758 | -0.96868 | H | 1.940913 | 0.548621 | -1.99269 |
| H | -2.12089 | 0.41288  | 2.641667 | H | 2.635756 | -0.16383 | -4.22376 |
| H | -3.65939 | -0.36483 | 4.426532 | H | 4.976736 | 0.255418 | -5.01143 |
| H | -6.0507  | 0.305942 | 4.42607  | H | 6.542883 | 1.507743 | -3.58245 |
| H | -6.93337 | 1.789856 | 2.621707 | H | 2.563457 | 3.184048 | 4.509141 |
| H | -1.83771 | 5.206048 | -3.23204 | H | 0.695513 | 4.412941 | 5.559853 |
| H | 0.281526 | 6.161074 | -4.08182 | H | -1.35545 | 4.919681 | 4.240621 |
| H | 2.442667 | 5.510233 | -3.02232 | H | -1.60785 | 4.071426 | 1.944856 |
| H | 2.479838 | 3.864618 | -1.1928  | H | 5.989097 | 0.648363 | 2.93727  |
| H | -5.16083 | 3.139772 | -3.15173 | H | 7.598289 | 1.126365 | 4.767162 |
| H | -6.47611 | 4.732127 | -4.52931 | H | 7.485435 | 3.291727 | 5.991085 |
| H | -6.23081 | 7.181602 | -4.17825 | H | 5.770052 | 4.97922  | 5.352376 |
| H | -4.66495 | 8.032671 | -2.44107 | H | 4.174606 | 4.500509 | 3.527689 |
| H | -3.36415 | 6.438371 | -1.05276 | C | 5.153828 | 1.772708 | -1.941   |
| H | 5.297214 | -4.75038 | 0.498014 | C | 6.033238 | 2.71129  | -1.27677 |
| H | 7.722793 | -5.11289 | 0.103665 | C | 7.462491 | 2.5441   | -1.35873 |
| H | 8.299915 | -0.84143 | -0.48308 | C | 5.543588 | 3.921068 | -0.66283 |
| H | 5.879058 | -0.43625 | -0.0792  | C | 8.323215 | 3.454189 | -0.81532 |
| H | 1.652437 | -1.41957 | 2.838757 | H | 7.851339 | 1.638741 | -1.81348 |
| H | 2.879501 | -1.42341 | 4.994401 | C | 6.3899   | 4.863791 | -0.15656 |
| H | 5.30645  | -1.92764 | 5.072184 | H | 4.475463 | 4.09831  | -0.65162 |
| H | 6.544715 | -2.45365 | 2.968327 | H | 9.397056 | 3.302986 | -0.82841 |
| H | 2.30956  | -3.8518  | -4.28458 | H | 6.018846 | 5.789849 | 0.267493 |
| H | 0.346769 | -4.73134 | -5.50944 | C | 7.836991 | 4.681008 | -0.18006 |
| H | -1.89649 | -4.71788 | -4.42495 | O | 8.637209 | 5.538298 | 0.299855 |
| H | -2.18709 | -3.75203 | -2.17728 |   |          |          |          |

Excited State 1: 3.000-A -0.5891 eV -2104.57 nm f=-0.0000 <S\*\*2>=2.000

|              |          |
|--------------|----------|
| 429A -> 437A | 0.12566  |
| 430A -> 437A | -0.11140 |
| 433A -> 438A | 0.39984  |
| 435A -> 437A | -0.54700 |
| 429B -> 437B | -0.12566 |
| 430B -> 437B | 0.11142  |
| 433B -> 438B | -0.39984 |
| 435B -> 437B | 0.54701  |

This state for optimization and/or second-order correction.



Total Energy, E(TD-HF/TD-DFT) = -6023.98797584

Copying the excited state density for this state as the 1-particle RhoCI density.

Excited State 2: 3.000-A -0.5815 eV -2132.01 nm f=-0.0000 <S\*\*2>=2.000

429A -> 438A -0.10717

433A -> 437A -0.45367

435A -> 438A 0.50403

429B -> 438B 0.10717

433B -> 437B 0.45369

435B -> 438B -0.50402

Excited State 3: 3.000-A 0.3157 eV 3927.44 nm f=0.0000 <S\*\*2>=2.000

436A -> 437A -0.70286

436B -> 437B 0.70580

Excited State 4: 1.000-A 0.3249 eV 3815.79 nm f=0.0010 <S\*\*2>=0.000

436A -> 437A 0.70646

436B -> 437B 0.70352

Excited State 5: 3.000-A 0.3955 eV 3134.99 nm f=0.0000 <S\*\*2>=2.000

436A -> 438A -0.70116

436B -> 438B 0.70171

Excited State 6: 1.000-A 0.4202 eV 2950.82 nm f=0.0043 <S\*\*2>=0.000

436A -> 438A 0.70615

436B -> 438B 0.70561

Excited State 7: 3.000-A 0.6551 eV 1892.47 nm f=0.0000 <S\*\*2>=2.000

429A -> 438A -0.21583

430A -> 438A 0.18560

433A -> 437A -0.42270

435A -> 438A -0.48220

429B -> 438B 0.21584

430B -> 438B -0.18563

433B -> 437B 0.42277

435B -> 438B 0.48230

Excited State 8: 3.000-A 0.7401 eV 1675.28 nm f=0.0000 <S\*\*2>=2.000

429A -> 437A -0.19669  
430A -> 437A 0.18236  
433A -> 438A -0.47267  
435A -> 437A -0.45010  
429B -> 437B 0.19673  
430B -> 437B -0.18242  
433B -> 438B 0.47276  
435B -> 437B 0.45034

Excited State 9: 1.000-A 0.7966 eV 1556.34 nm f=0.1334 <S\*\*2>=0.000

433A -> 438A 0.25630  
435A -> 437A 0.65180  
433B -> 438B 0.25612  
435B -> 437B 0.65164  
435A <- 437A -0.13669  
435B <- 437B -0.13668

Excited State 10: 1.000-A 0.7971 eV 1555.46 nm f=0.0019 <S\*\*2>=0.000

433A -> 437A 0.40046  
435A -> 438A 0.56681  
433B -> 437B 0.40038  
435B -> 438B 0.56674

Excited State 11: 3.000-A 0.8437 eV 1469.50 nm f=0.0000 <S\*\*2>=2.000

432A -> 437A -0.10725  
434A -> 437A -0.68792  
432B -> 437B 0.10771  
434B -> 437B 0.69126

Excited State 12: 1.000-A 0.8518 eV 1455.61 nm f=0.0009 <S\*\*2>=0.000

434A -> 437A 0.69243  
435A -> 438A -0.10286  
434B -> 437B 0.68908  
435B -> 438B -0.10291

Excited State 13: 3.000-A 0.9135 eV 1357.20 nm f=0.0000 <S\*\*2>=2.000

428A -> 438A 0.13553  
432A -> 438A -0.16622  
434A -> 438A -0.66103  
428B -> 438B -0.13564  
432B -> 438B 0.16644  
434B -> 438B 0.66208

Excited State 14: 1.000-A 0.9287 eV 1334.97 nm f=0.0045 <S\*\*2>=0.000

432A -> 438A 0.12746  
434A -> 438A 0.68345  
432B -> 438B 0.12721  
434B -> 438B 0.68242

Excited State 15: 3.000-A 1.0408 eV 1191.28 nm f=0.0000 <S\*\*2>=2.000

428A -> 437A 0.25423  
430A -> 438A -0.10633  
432A -> 437A -0.59195  
433A -> 437A -0.18934  
434A -> 437A 0.13283  
428B -> 437B -0.25457  
430B -> 438B 0.10640  
432B -> 437B 0.59337  
433B -> 437B 0.18988  
434B -> 437B -0.13305

Excited State 16: 1.000-A 1.0578 eV 1172.11 nm f=0.0018 <S\*\*2>=0.000

428A -> 437A -0.13447  
432A -> 437A 0.62204  
433A -> 437A 0.24213  
435A -> 438A -0.15055  
428B -> 437B -0.13388  
432B -> 437B 0.62070  
433B -> 437B 0.24168  
435B -> 438B -0.15056

Excited State 17: 3.000-A 1.0727 eV 1155.82 nm f=0.0000 <S\*\*2>=2.000

|              |          |
|--------------|----------|
| 428A -> 438A | 0.40113  |
| 429A -> 437A | 0.11837  |
| 430A -> 437A | -0.17274 |
| 431A -> 437A | 0.13283  |
| 432A -> 438A | -0.42499 |
| 433A -> 438A | -0.17935 |
| 434A -> 438A | 0.22185  |
| 428B -> 438B | -0.40150 |
| 429B -> 437B | -0.11849 |
| 430B -> 437B | 0.17299  |
| 431B -> 437B | -0.13302 |
| 432B -> 438B | 0.42554  |
| 433B -> 438B | 0.17999  |
| 434B -> 438B | -0.22206 |

Excited State 18: 1.000-A 1.0946 eV 1132.64 nm f=0.0461 <S\*\*2>=0.000

|              |          |
|--------------|----------|
| 428A -> 438A | -0.21479 |
| 430A -> 437A | 0.16659  |
| 431A -> 437A | -0.13630 |
| 432A -> 438A | 0.39508  |
| 433A -> 438A | 0.45779  |
| 434A -> 438A | -0.13317 |
| 435A -> 437A | -0.14618 |
| 428B -> 438B | -0.21420 |
| 430B -> 437B | 0.16641  |
| 431B -> 437B | -0.13610 |
| 432B -> 438B | 0.39441  |
| 433B -> 438B | 0.45756  |
| 434B -> 438B | -0.13289 |
| 435B -> 437B | -0.14615 |

Excited State 19: 3.000-A 1.1565 eV 1072.06 nm f=0.0000 <S\*\*2>=2.000

|              |          |
|--------------|----------|
| 423A -> 438A | -0.13021 |
| 424A -> 437A | -0.14776 |

|              |          |
|--------------|----------|
| 428A -> 438A | -0.13344 |
| 429A -> 437A | 0.22556  |
| 430A -> 437A | -0.50421 |
| 431A -> 437A | -0.21708 |
| 432A -> 438A | 0.17540  |
| 433A -> 438A | -0.22762 |
| 423B -> 438B | 0.13019  |
| 424B -> 437B | 0.14774  |
| 428B -> 438B | 0.13364  |
| 429B -> 437B | -0.22581 |
| 430B -> 437B | 0.50511  |
| 431B -> 437B | 0.21772  |
| 432B -> 438B | -0.17611 |
| 433B -> 438B | 0.22801  |

Excited State 20: 3.000-A 1.1705 eV 1059.26 nm f=0.0000 <S\*\*2>=2.000

|              |          |
|--------------|----------|
| 423A -> 437A | 0.36721  |
| 424A -> 438A | 0.30317  |
| 429A -> 438A | -0.24070 |
| 430A -> 438A | 0.35668  |
| 432A -> 437A | -0.15817 |
| 433A -> 437A | 0.18076  |
| 423B -> 437B | -0.36717 |
| 424B -> 438B | -0.30311 |
| 429B -> 438B | 0.24073  |
| 430B -> 438B | -0.35681 |
| 432B -> 437B | 0.15821  |
| 433B -> 437B | -0.18087 |

Excited State 21: 3.000-A 1.1749 eV 1055.23 nm f=0.0000 <S\*\*2>=2.000

|              |          |
|--------------|----------|
| 423A -> 438A | 0.40412  |
| 424A -> 437A | 0.51447  |
| 425A -> 438A | 0.11774  |
| 430A -> 437A | -0.15487 |
| 423B -> 438B | -0.40407 |
| 424B -> 437B | -0.51441 |

425B -> 438B -0.11767  
430B -> 437B 0.15922

Excited State 22: 1.000-A 1.1761 eV 1054.16 nm f=0.0130 <S\*\*2>=0.000

429A -> 437A -0.13393  
430A -> 437A 0.44566  
431A -> 437A 0.32565  
432A -> 438A -0.34603  
433A -> 438A 0.23551  
429B -> 437B -0.13300  
430B -> 437B 0.44311  
431B -> 437B 0.32460  
432B -> 438B -0.34525  
433B -> 438B 0.23447

Excited State 23: 3.000-A 1.1763 eV 1054.03 nm f=0.0000 <S\*\*2>=2.000

423A -> 437A 0.36529  
424A -> 438A 0.31656  
425A -> 437A 0.12132  
429A -> 438A 0.22082  
430A -> 438A -0.34310  
432A -> 437A 0.16762  
433A -> 437A -0.16662  
423B -> 437B -0.36526  
424B -> 438B -0.31651  
425B -> 437B -0.12123  
429B -> 438B -0.22086  
430B -> 438B 0.34323  
432B -> 437B -0.16764  
433B -> 437B 0.16670

Excited State 24: 3.000-A 1.2042 eV 1029.56 nm f=0.0000 <S\*\*2>=2.000

426A -> 438A -0.11085  
428A -> 437A -0.61981  
430A -> 438A -0.13013  
432A -> 437A -0.24591

426B -> 438B 0.11090  
428B -> 437B 0.62028  
430B -> 438B 0.13019  
432B -> 437B 0.24612

Excited State 25: 3.000-A 1.2207 eV 1015.68 nm f=0.0000 <S\*\*2>=2.000

428A -> 438A 0.39847  
430A -> 437A 0.10898  
431A -> 437A -0.52368  
432A -> 438A 0.16914  
428B -> 438B -0.39882  
430B -> 437B -0.10935  
431B -> 437B 0.52474  
432B -> 438B -0.16865

Excited State 26: 1.000-A 1.2351 eV 1003.80 nm f=0.0037 <S\*\*2>=0.000

429A -> 437A 0.12818  
431A -> 437A 0.58723  
432A -> 438A 0.32337  
433A -> 438A -0.10578  
434A -> 438A -0.10808  
429B -> 437B 0.12843  
431B -> 437B 0.58717  
432B -> 438B 0.32476  
433B -> 438B -0.10563  
434B -> 438B -0.10812

Excited State 27: 1.000-A 1.2450 eV 995.89 nm f=0.0085 <S\*\*2>=0.000

428A -> 437A -0.34078  
430A -> 438A 0.22018  
432A -> 437A -0.30456  
433A -> 437A 0.40666  
435A -> 438A -0.30480  
428B -> 437B -0.34035  
430B -> 438B 0.22014  
432B -> 437B -0.30435

433B -> 437B 0.40662  
435B -> 438B -0.30482  
433A <- 437A -0.11002  
435A <- 438A 0.13975  
433B <- 437B -0.11001  
435B <- 438B 0.13975

Excited State 28: 3.000-A 1.2450 eV 995.83 nm f=0.0000 <S\*\*2>=2.000

428A -> 438A 0.31919  
429A -> 437A 0.15481  
431A -> 437A 0.37498  
432A -> 438A 0.46412  
428B -> 438B -0.31958  
429B -> 437B -0.15458  
431B -> 437B -0.37352  
432B -> 438B -0.46355

Excited State 29: 1.000-A 1.2682 eV 977.61 nm f=0.0420 <S\*\*2>=0.000

428A -> 438A 0.34800  
429A -> 437A 0.19961  
430A -> 437A 0.43402  
431A -> 437A -0.14245  
432A -> 438A 0.27223  
433A -> 438A -0.19560  
435A -> 437A 0.13995  
428B -> 438B 0.34756  
429B -> 437B 0.19993  
430B -> 437B 0.43412  
431B -> 437B -0.14250  
432B -> 438B 0.27192  
433B -> 438B -0.19571  
435B -> 437B 0.13994

Excited State 30: 1.000-A 1.2758 eV 971.80 nm f=0.0001 <S\*\*2>=0.000

428A -> 437A 0.36916  
430A -> 438A 0.52904



431A -> 438A 0.25615  
428B -> 437B 0.36888  
430B -> 438B 0.52892  
431B -> 438B 0.25621

Excited State 31: 3.000-A 1.3060 eV 949.35 nm f=0.0000 <S\*\*2>=2.000

429A -> 437A -0.58167  
430A -> 437A -0.35664  
433A -> 438A 0.10336  
429B -> 437B 0.58223  
430B -> 437B 0.35662  
433B -> 438B -0.10335

Excited State 32: 3.000-A 1.3103 eV 946.23 nm f=0.0000 <S\*\*2>=2.000

429A -> 438A -0.20812  
431A -> 438A -0.65731  
429B -> 438B 0.20869  
431B -> 438B 0.65996

Excited State 33: 1.000-A 1.3144 eV 943.28 nm f=0.0014 <S\*\*2>=0.000

428A -> 437A -0.31032  
429A -> 438A 0.12017  
431A -> 438A 0.60549  
433A -> 437A -0.10298  
428B -> 437B -0.30991  
429B -> 438B 0.11924  
431B -> 438B 0.60255  
433B -> 437B -0.10276

Excited State 34: 1.000-A 1.3314 eV 931.21 nm f=0.0031 <S\*\*2>=0.000

428A -> 438A -0.45642  
429A -> 437A 0.46926  
430A -> 437A 0.18560  
432A -> 438A -0.14253  
428B -> 438B -0.45618  
429B -> 437B 0.46847

430B -> 437B 0.18514  
432B -> 438B -0.14243

Excited State 35: 3.000-A 1.3687 eV 905.84 nm f=0.0000 <S\*\*2>=2.000

429A -> 438A -0.51957  
430A -> 438A -0.41748  
431A -> 438A 0.19520  
429B -> 438B 0.52005  
430B -> 438B 0.41782  
431B -> 438B -0.19549

Excited State 36: 1.000-A 1.3858 eV 894.69 nm f=0.0015 <S\*\*2>=0.000

428A -> 437A -0.28778  
429A -> 438A 0.35007  
430A -> 438A 0.36774  
431A -> 438A -0.23945  
433A -> 437A -0.26986  
435A -> 438A 0.18980  
428B -> 437B -0.28766  
429B -> 438B 0.34948  
430B -> 438B 0.36726  
431B -> 438B -0.23925  
433B -> 437B -0.26979  
435B -> 438B 0.18984

Excited State 37: 1.000-A 1.4964 eV 828.54 nm f=0.0090 <S\*\*2>=0.000

423A -> 437A -0.16979  
424A -> 438A -0.13640  
428A -> 437A 0.20080  
429A -> 438A 0.57180  
430A -> 438A -0.14689  
433A -> 437A 0.17746  
435A -> 438A -0.18086  
423B -> 437B -0.16984  
424B -> 438B -0.13643  
428B -> 437B 0.20078

429B -> 438B 0.57170  
430B -> 438B -0.14693  
433B -> 437B 0.17748  
435B -> 438B -0.18086

Excited State 38: 1.000-A 1.5012 eV 825.92 nm f=0.1472 <S\*\*2>=0.000

423A -> 438A -0.18753  
424A -> 437A -0.22090  
428A -> 438A 0.30705  
429A -> 437A 0.39826  
430A -> 437A -0.16920  
433A -> 438A 0.30645  
435A -> 437A -0.21669  
423B -> 438B -0.18756  
424B -> 437B -0.22095  
428B -> 438B 0.30703  
429B -> 437B 0.39820  
430B -> 437B -0.16922  
433B -> 438B 0.30646  
435B -> 437B -0.21669  
433A <- 438A -0.10540  
435A <- 437A 0.12267  
433B <- 438B -0.10541  
435B <- 437B 0.12268

Excited State 39: 1.000-A 1.5617 eV 793.91 nm f=0.0022 <S\*\*2>=0.000

423A -> 437A 0.50063  
424A -> 438A 0.41142  
425A -> 437A 0.14138  
429A -> 438A 0.16352  
423B -> 437B 0.50076  
424B -> 438B 0.41149  
425B -> 437B 0.14131  
429B -> 438B 0.16351

Excited State 40: 1.000-A 1.5649 eV 792.29 nm f=0.0416 <S\*\*2>=0.000

423A -> 438A 0.37454  
424A -> 437A 0.50272  
425A -> 438A 0.12853  
428A -> 438A 0.11314  
429A -> 437A 0.17209  
433A -> 438A 0.14745  
435A -> 437A -0.10937  
423B -> 438B 0.37462  
424B -> 437B 0.50283  
425B -> 438B 0.12848  
428B -> 438B 0.11314  
429B -> 437B 0.17207  
433B -> 438B 0.14745  
435B -> 437B -0.10937

Excited State 41: 3.000-A 1.6108 eV 769.68 nm f=0.0000 <S\*\*2>=2.000

426A -> 438A -0.67291  
428A -> 437A 0.12157  
426B -> 438B 0.67334  
428B -> 437B -0.12157

Excited State 42: 3.000-A 1.6410 eV 755.54 nm f=0.0000 <S\*\*2>=2.000

426A -> 437A -0.67740  
428A -> 438A 0.11959  
426B -> 437B 0.67823  
428B -> 438B -0.11957

Excited State 43: 1.000-A 1.6845 eV 736.04 nm f=0.0047 <S\*\*2>=0.000

426A -> 437A 0.69861  
426B -> 437B 0.69781

Excited State 44: 1.000-A 1.6928 eV 732.42 nm f=0.0002 <S\*\*2>=0.000

426A -> 438A 0.69441  
426B -> 438B 0.69399

Excited State 45: 3.000-A 1.7436 eV 711.08 nm f=0.0000 <S\*\*2>=2.000

427A -> 437A -0.69516  
427B -> 437B 0.69959

Excited State 46: 1.000-A 1.7496 eV 708.64 nm f=0.0001 <S\*\*2>=0.000  
427A -> 437A 0.70550  
427B -> 437B 0.70110

Excited State 47: 3.000-A 1.8285 eV 678.06 nm f=0.0000 <S\*\*2>=2.000  
427A -> 438A -0.68683  
427B -> 438B 0.68796

Excited State 48: 1.000-A 1.8401 eV 673.80 nm f=0.0004 <S\*\*2>=0.000  
427A -> 438A 0.70218  
427B -> 438B 0.70107

Excited State 49: 3.000-A 1.8876 eV 656.85 nm f=0.0000 <S\*\*2>=2.000  
398A -> 438A -0.14400  
399A -> 437A 0.18309  
401A -> 438A 0.10640  
405A -> 437A -0.11975  
413A -> 437A -0.13107  
419A -> 437A -0.13527  
420A -> 438A 0.17777  
421A -> 437A -0.36768  
422A -> 438A -0.10057  
425A -> 438A 0.33795  
426A -> 437A 0.12000  
398B -> 438B 0.14400  
399B -> 437B -0.18309  
401B -> 438B -0.10639  
405B -> 437B 0.11974  
413B -> 437B 0.13107  
419B -> 437B 0.13528  
420B -> 438B -0.17778  
421B -> 437B 0.36774  
422B -> 438B 0.10057

425B -> 438B -0.33803  
426B -> 437B -0.11996

Excited State 50: 3.000-A 1.8878 eV 656.76 nm f=0.0000 <S\*\*2>=2.000

398A -> 437A 0.14424  
399A -> 438A -0.14294  
401A -> 437A -0.11230  
413A -> 438A 0.10475  
419A -> 438A 0.11542  
420A -> 437A -0.19129  
421A -> 438A 0.27967  
422A -> 437A 0.11598  
423A -> 437A 0.11555  
425A -> 437A -0.44523  
398B -> 437B -0.14424  
399B -> 438B 0.14294  
401B -> 437B 0.11229  
413B -> 438B -0.10475  
419B -> 438B -0.11543  
420B -> 437B 0.19130  
421B -> 438B -0.27971  
422B -> 437B -0.11599  
423B -> 437B -0.11551  
425B -> 437B 0.44544

Excited State 51: 3.000-A 1.9744 eV 627.95 nm f=0.0000 <S\*\*2>=2.000

398A -> 437A -0.12955  
399A -> 438A 0.12070  
401A -> 437A 0.15686  
405A -> 438A -0.12722  
409A -> 437A 0.10450  
411A -> 438A -0.11326  
412A -> 437A -0.14987  
413A -> 438A -0.13226  
416A -> 437A 0.18240  
420A -> 437A 0.20582

|              |          |
|--------------|----------|
| 421A -> 438A | -0.10978 |
| 423A -> 437A | 0.12277  |
| 425A -> 437A | -0.45798 |
| 398B -> 437B | 0.12956  |
| 399B -> 438B | -0.12070 |
| 401B -> 437B | -0.15685 |
| 405B -> 438B | 0.12720  |
| 409B -> 437B | -0.10451 |
| 411B -> 438B | 0.11327  |
| 412B -> 437B | 0.14987  |
| 413B -> 438B | 0.13225  |
| 416B -> 437B | -0.18242 |
| 420B -> 437B | -0.20584 |
| 421B -> 438B | 0.10970  |
| 423B -> 437B | -0.12288 |
| 425B -> 437B | 0.45873  |

Excited State 52: 3.000-A 1.9954 eV 621.35 nm f=0.0000 <S\*\*2>=2.000

|              |          |
|--------------|----------|
| 399A -> 437A | 0.10975  |
| 401A -> 438A | 0.10282  |
| 405A -> 437A | -0.12025 |
| 411A -> 437A | -0.11184 |
| 413A -> 437A | -0.12569 |
| 416A -> 438A | 0.14709  |
| 420A -> 438A | 0.14601  |
| 421A -> 437A | -0.10375 |
| 423A -> 438A | 0.13981  |
| 425A -> 438A | -0.53425 |
| 427A -> 438A | -0.12669 |
| 399B -> 437B | -0.10976 |
| 401B -> 438B | -0.10281 |
| 405B -> 437B | 0.12023  |
| 411B -> 437B | 0.11183  |
| 413B -> 437B | 0.12569  |
| 416B -> 438B | -0.14710 |
| 420B -> 438B | -0.14602 |

421B -> 437B 0.10375  
423B -> 438B -0.13976  
425B -> 438B 0.53450  
427B -> 438B 0.12670

Excited State 53: 1.000-A 2.0072 eV 617.70 nm f=0.0016 <S\*\*2>=0.000

423A -> 437A -0.17384  
425A -> 437A 0.67370  
423B -> 437B -0.17356  
425B -> 437B 0.67316

Excited State 54: 3.000-A 2.0153 eV 615.20 nm f=0.0000 <S\*\*2>=2.000

436A -> 439A -0.69814  
436B -> 439B 0.69816

Excited State 55: 1.000-A 2.0229 eV 612.91 nm f=0.0000 <S\*\*2>=0.000

436A -> 439A 0.70026  
436B -> 439B 0.70025

Excited State 56: 3.000-A 2.0291 eV 611.04 nm f=0.0000 <S\*\*2>=2.000

436A -> 440A -0.69805  
436B -> 440B 0.69807

Excited State 57: 1.000-A 2.0339 eV 609.58 nm f=0.0002 <S\*\*2>=0.000

436A -> 440A 0.70000  
436B -> 440B 0.69997

Excited State 58: 3.000-A 2.0629 eV 601.03 nm f=0.0000 <S\*\*2>=2.000

401A -> 437A -0.11511  
403A -> 437A -0.12428  
405A -> 438A 0.11174  
409A -> 437A -0.10000  
411A -> 438A 0.16547  
412A -> 437A 0.20932  
413A -> 438A 0.16642  
416A -> 437A -0.14158



|              |          |
|--------------|----------|
| 420A -> 437A | 0.12287  |
| 421A -> 438A | -0.26922 |
| 422A -> 437A | -0.36681 |
| 425A -> 437A | -0.19477 |
| 401B -> 437B | 0.11512  |
| 403B -> 437B | 0.12429  |
| 405B -> 438B | -0.11174 |
| 409B -> 437B | 0.10001  |
| 411B -> 438B | -0.16548 |
| 412B -> 437B | -0.20936 |
| 413B -> 438B | -0.16642 |
| 416B -> 437B | 0.14159  |
| 420B -> 437B | -0.12294 |
| 421B -> 438B | 0.26936  |
| 422B -> 437B | 0.36707  |
| 425B -> 437B | 0.19463  |

Excited State 59: 3.000-A 2.0641 eV 600.66 nm f=0.0000 <S\*\*2>=2.000

|              |          |
|--------------|----------|
| 400A -> 437A | 0.12799  |
| 401A -> 438A | -0.13451 |
| 403A -> 438A | -0.10420 |
| 405A -> 437A | 0.15983  |
| 409A -> 438A | -0.10463 |
| 411A -> 437A | 0.20575  |
| 412A -> 438A | 0.19864  |
| 413A -> 437A | 0.25027  |
| 416A -> 438A | -0.12505 |
| 421A -> 437A | -0.33233 |
| 422A -> 438A | -0.18523 |
| 425A -> 438A | -0.18774 |
| 400B -> 437B | -0.12799 |
| 401B -> 438B | 0.13453  |
| 403B -> 438B | 0.10418  |
| 405B -> 437B | -0.15982 |
| 409B -> 438B | 0.10463  |
| 411B -> 437B | -0.20577 |

412B -> 438B -0.19867  
413B -> 437B -0.25033  
416B -> 438B 0.12504  
421B -> 437B 0.33253  
422B -> 438B 0.18534  
425B -> 438B 0.18815

Excited State 60: 1.000-A 2.0746 eV 597.63 nm f=0.0416 <S\*\*2>=0.000

421A -> 437A -0.21640  
423A -> 438A -0.15659  
425A -> 438A 0.63924  
421B -> 437B -0.21658  
423B -> 438B -0.15640  
425B -> 438B 0.63897

Excited State 61: 1.000-A 2.1214 eV 584.45 nm f=0.0335 <S\*\*2>=0.000

420A -> 438A -0.15714  
421A -> 437A 0.61345  
422A -> 438A 0.17355  
425A -> 438A 0.20270  
420B -> 438B -0.15698  
421B -> 437B 0.61348  
422B -> 438B 0.17356  
425B -> 438B 0.20258

Excited State 62: 3.000-A 2.1256 eV 583.29 nm f=0.0000 <S\*\*2>=2.000

398A -> 437A 0.14888  
399A -> 438A -0.11989  
400A -> 438A -0.20296  
403A -> 437A 0.23800  
416A -> 437A 0.19891  
418A -> 438A 0.15066  
420A -> 437A -0.14605  
422A -> 437A -0.47960  
398B -> 437B -0.14908  
399B -> 438B 0.11993

400B -> 438B 0.20294  
403B -> 437B -0.23785  
416B -> 437B -0.19936  
418B -> 438B -0.15062  
420B -> 437B 0.14533  
422B -> 437B 0.48524

Excited State 63: 1.000-A 2.1292 eV 582.31 nm f=0.0002 <S\*\*2>=0.000

421A -> 438A 0.21140  
422A -> 437A 0.65753  
421B -> 438B 0.21125  
422B -> 437B 0.65331

Excited State 64: 3.000-A 2.1458 eV 577.79 nm f=0.0000 <S\*\*2>=2.000

398A -> 438A -0.17814  
399A -> 437A 0.21046  
400A -> 437A 0.27805  
403A -> 438A -0.24599  
416A -> 438A -0.19306  
418A -> 437A -0.25453  
419A -> 437A 0.10746  
420A -> 438A 0.10505  
421A -> 437A 0.21734  
422A -> 438A 0.28451  
398B -> 438B 0.17814  
399B -> 437B -0.21046  
400B -> 437B -0.27807  
403B -> 438B 0.24601  
416B -> 438B 0.19304  
418B -> 437B 0.25463  
419B -> 437B -0.10742  
420B -> 438B -0.10521  
421B -> 437B -0.21683  
422B -> 438B -0.28447

Excited State 65: 3.000-A 2.1795 eV 568.85 nm f=0.0000 <S\*\*2>=2.000

|              |          |
|--------------|----------|
| 398A -> 437A | 0.14278  |
| 399A -> 438A | -0.13400 |
| 400A -> 438A | -0.14632 |
| 403A -> 437A | 0.18611  |
| 412A -> 437A | 0.11044  |
| 416A -> 437A | 0.18555  |
| 417A -> 437A | 0.12421  |
| 418A -> 438A | 0.13969  |
| 419A -> 438A | -0.10740 |
| 421A -> 438A | -0.42360 |
| 422A -> 437A | 0.31330  |
| 398B -> 437B | -0.14282 |
| 399B -> 438B | 0.13402  |
| 400B -> 438B | 0.14631  |
| 403B -> 437B | -0.18612 |
| 412B -> 437B | -0.11047 |
| 416B -> 437B | -0.18573 |
| 417B -> 437B | -0.12440 |
| 418B -> 438B | -0.13965 |
| 419B -> 438B | 0.10754  |
| 421B -> 438B | 0.42460  |
| 422B -> 437B | -0.31357 |

Excited State 66: 3.000-A 2.1839 eV 567.72 nm f=0.0000 <S\*\*2>=2.000

|              |          |
|--------------|----------|
| 418A -> 437A | -0.10061 |
| 421A -> 437A | 0.29539  |
| 422A -> 438A | -0.58517 |
| 418B -> 437B | 0.10065  |
| 421B -> 437B | -0.29537 |
| 422B -> 438B | 0.58571  |

Excited State 67: 1.000-A 2.1954 eV 564.74 nm f=0.0019 <S\*\*2>=0.000

|              |          |
|--------------|----------|
| 420A -> 437A | -0.30829 |
| 421A -> 438A | 0.55758  |
| 422A -> 437A | -0.23599 |
| 420B -> 437B | -0.30831 |

421B -> 438B 0.55684  
422B -> 437B -0.23540

Excited State 68: 1.000-A 2.2209 eV 558.25 nm f=0.0066 <S\*\*2>=0.000

421A -> 437A -0.15221  
422A -> 438A 0.66321  
421B -> 437B -0.15202  
422B -> 438B 0.66274

Excited State 69: 1.000-A 2.2605 eV 548.49 nm f=0.0035 <S\*\*2>=0.000

416A -> 438A 0.24382  
418A -> 437A 0.51746  
419A -> 437A -0.18634  
420A -> 438A -0.30202  
416B -> 438B 0.24461  
418B -> 437B 0.51934  
419B -> 437B -0.18722  
420B -> 438B -0.30316

Excited State 70: 1.000-A 2.2605 eV 548.47 nm f=0.0004 <S\*\*2>=0.000

416A -> 437A -0.34516  
418A -> 438A -0.36087  
419A -> 438A 0.14196  
420A -> 437A 0.39143  
421A -> 438A 0.18427  
416B -> 437B -0.34605  
418B -> 438B -0.36203  
419B -> 438B 0.14243  
420B -> 437B 0.39294  
421B -> 438B 0.18419

Excited State 71: 3.000-A 2.2661 eV 547.13 nm f=0.0000 <S\*\*2>=2.000

395A -> 437A -0.15049  
396A -> 438A -0.14417  
399A -> 437A 0.13641  
400A -> 437A 0.22386

|              |          |
|--------------|----------|
| 403A -> 438A | -0.20191 |
| 416A -> 438A | 0.18932  |
| 418A -> 437A | 0.41508  |
| 419A -> 437A | -0.19885 |
| 420A -> 438A | -0.25041 |
| 395B -> 437B | 0.15043  |
| 396B -> 438B | 0.14410  |
| 399B -> 437B | -0.13656 |
| 400B -> 437B | -0.22409 |
| 403B -> 438B | 0.20211  |
| 416B -> 438B | -0.18815 |
| 418B -> 437B | -0.41264 |
| 419B -> 437B | 0.19798  |
| 420B -> 438B | 0.24896  |

Excited State 72: 3.000-A 2.2667 eV 546.98 nm f=0.0000 <S\*\*2>=2.000

|              |          |
|--------------|----------|
| 395A -> 438A | 0.12934  |
| 396A -> 437A | 0.18074  |
| 399A -> 438A | -0.11812 |
| 400A -> 438A | -0.18492 |
| 403A -> 437A | 0.24596  |
| 416A -> 437A | -0.23735 |
| 418A -> 438A | -0.30342 |
| 419A -> 438A | 0.12411  |
| 420A -> 437A | 0.37108  |
| 395B -> 438B | -0.12925 |
| 396B -> 437B | -0.18067 |
| 399B -> 438B | 0.11825  |
| 400B -> 438B | 0.18509  |
| 403B -> 437B | -0.24615 |
| 416B -> 437B | 0.23591  |
| 418B -> 438B | 0.30189  |
| 419B -> 438B | -0.12353 |
| 420B -> 437B | -0.36942 |

Excited State 73: 3.000-A 2.2852 eV 542.56 nm f=0.0000 <S\*\*2>=2.000

|              |          |
|--------------|----------|
| 398A -> 438A | 0.16482  |
| 399A -> 437A | -0.22493 |
| 400A -> 437A | 0.18402  |
| 401A -> 438A | -0.20467 |
| 403A -> 438A | -0.11977 |
| 405A -> 437A | 0.18694  |
| 410A -> 437A | -0.10437 |
| 412A -> 438A | -0.11369 |
| 413A -> 437A | -0.33593 |
| 416A -> 438A | 0.18020  |
| 418A -> 437A | -0.11126 |
| 419A -> 437A | -0.15994 |
| 420A -> 438A | 0.18598  |
| 398B -> 438B | -0.16484 |
| 399B -> 437B | 0.22496  |
| 400B -> 437B | -0.18403 |
| 401B -> 438B | 0.20468  |
| 403B -> 438B | 0.11975  |
| 405B -> 437B | -0.18695 |
| 410B -> 437B | 0.10440  |
| 412B -> 438B | 0.11371  |
| 413B -> 437B | 0.33608  |
| 416B -> 438B | -0.18031 |
| 418B -> 437B | 0.11122  |
| 419B -> 437B | 0.16009  |
| 420B -> 438B | -0.18600 |

Excited State 74: 3.000-A 2.2866 eV 542.22 nm f=0.0000 <S\*\*2>=2.000

|              |          |
|--------------|----------|
| 398A -> 437A | 0.21501  |
| 399A -> 438A | -0.19894 |
| 400A -> 438A | 0.17013  |
| 401A -> 437A | -0.25036 |
| 403A -> 437A | -0.16546 |
| 405A -> 438A | 0.14765  |
| 412A -> 437A | -0.12670 |
| 413A -> 438A | -0.25665 |

416A -> 437A 0.24194  
420A -> 437A 0.22662  
398B -> 437B -0.21505  
399B -> 438B 0.19896  
400B -> 438B -0.17013  
401B -> 437B 0.25039  
403B -> 437B 0.16545  
405B -> 438B -0.14764  
412B -> 437B 0.12673  
413B -> 438B 0.25676  
416B -> 437B -0.24213  
420B -> 437B -0.22669

Excited State 75: 3.000-A 2.3162 eV 535.30 nm f=0.0000 <S\*\*2>=2.000

423A -> 437A 0.36038  
423A -> 438A -0.25604  
424A -> 437A 0.24145  
424A -> 438A -0.46479  
423B -> 437B -0.36586  
423B -> 438B 0.26012  
424B -> 437B -0.24463  
424B -> 438B 0.47177

Excited State 76: 3.000-A 2.3163 eV 535.27 nm f=0.0000 <S\*\*2>=2.000

423A -> 437A -0.23473  
423A -> 438A -0.45616  
424A -> 437A 0.37145  
424A -> 438A 0.26174  
425A -> 438A -0.10545  
423B -> 437B 0.23809  
423B -> 438B 0.46295  
424B -> 437B -0.37702  
424B -> 438B -0.26628  
425B -> 438B 0.10696

Excited State 77: 1.000-A 2.3170 eV 535.11 nm f=0.0000 <S\*\*2>=0.000



423A -> 437A -0.37370  
423A -> 438A 0.23396  
424A -> 437A -0.21643  
424A -> 438A 0.50129  
423B -> 437B -0.36820  
423B -> 438B 0.23111  
424B -> 437B -0.21310  
424B -> 438B 0.49391

Excited State 78: 1.000-A 2.3171 eV 535.08 nm f=0.0001 <S\*\*2>=0.000

423A -> 437A 0.21057  
423A -> 438A 0.48872  
424A -> 437A -0.38541  
424A -> 438A -0.24144  
425A -> 438A 0.11268  
423B -> 437B 0.20704  
423B -> 438B 0.48156  
424B -> 437B -0.37978  
424B -> 438B -0.23816  
425B -> 438B 0.11097

Excited State 79: 3.000-A 2.3297 eV 532.19 nm f=0.0000 <S\*\*2>=2.000

412A -> 437A -0.24552  
417A -> 437A -0.48873  
419A -> 438A 0.11802  
420A -> 437A -0.15468  
421A -> 438A -0.29727  
412B -> 437B 0.24585  
416B -> 437B 0.10048  
417B -> 437B 0.48975  
419B -> 438B -0.11833  
420B -> 437B 0.15527  
421B -> 438B 0.29780

Excited State 80: 3.000-A 2.3373 eV 530.46 nm f=0.0000 <S\*\*2>=2.000

395A -> 437A 0.11908

|              |          |
|--------------|----------|
| 396A -> 438A | 0.10579  |
| 398A -> 438A | -0.10385 |
| 400A -> 437A | -0.13455 |
| 403A -> 438A | 0.10435  |
| 411A -> 437A | 0.10456  |
| 412A -> 438A | 0.19656  |
| 417A -> 438A | 0.35339  |
| 419A -> 437A | -0.36790 |
| 420A -> 438A | 0.13903  |
| 421A -> 437A | 0.23054  |
| 395B -> 437B | -0.11906 |
| 396B -> 438B | -0.10577 |
| 398B -> 438B | 0.10385  |
| 400B -> 437B | 0.13451  |
| 403B -> 438B | -0.10433 |
| 411B -> 437B | -0.10465 |
| 412B -> 438B | -0.19661 |
| 417B -> 438B | -0.35375 |
| 419B -> 437B | 0.36857  |
| 420B -> 438B | -0.13932 |
| 421B -> 437B | -0.23073 |

Excited State 81: 1.000-A 2.3437 eV 529.00 nm f=0.0065 <S\*\*2>=0.000

|              |          |
|--------------|----------|
| 413A -> 438A | -0.18682 |
| 416A -> 437A | 0.33042  |
| 417A -> 437A | 0.38680  |
| 419A -> 438A | -0.14766 |
| 420A -> 437A | 0.30687  |
| 421A -> 438A | 0.25503  |
| 413B -> 438B | -0.18665 |
| 416B -> 437B | 0.33012  |
| 417B -> 437B | 0.38572  |
| 419B -> 438B | -0.14733 |
| 420B -> 437B | 0.30648  |
| 421B -> 438B | 0.25438  |

Excited State 82: 1.000-A 2.3564 eV 526.16 nm f=0.0227 <S\*\*2>=0.000

413A -> 437A 0.26708  
416A -> 438A -0.16631  
417A -> 438A -0.22786  
418A -> 437A 0.12894  
419A -> 437A 0.48301  
420A -> 438A -0.22496  
421A -> 437A -0.14307  
413B -> 437B 0.26701  
416B -> 438B -0.16618  
417B -> 438B -0.22735  
418B -> 437B 0.12890  
419B -> 437B 0.48255  
420B -> 438B -0.22469  
421B -> 437B -0.14274

Excited State 83: 1.000-A 2.3805 eV 520.84 nm f=0.0103 <S\*\*2>=0.000

412A -> 437A 0.24676  
413A -> 438A 0.25597  
416A -> 437A -0.27801  
417A -> 437A 0.47364  
420A -> 437A -0.15478  
412B -> 437B 0.24652  
413B -> 438B 0.25589  
416B -> 437B -0.27808  
417B -> 437B 0.47353  
420B -> 437B -0.15490

Excited State 84: 3.000-A 2.3888 eV 519.03 nm f=0.0000 <S\*\*2>=2.000

433A -> 440A 0.15237  
435A -> 439A 0.66043  
433B -> 440B -0.15156  
435B -> 439B -0.65686

Excited State 85: 1.000-A 2.3904 eV 518.67 nm f=0.0001 <S\*\*2>=0.000

433A -> 440A 0.15482

435A -> 439A 0.68398  
433B -> 440B 0.15559  
435B -> 439B 0.68728

Excited State 86: 3.000-A 2.3931 eV 518.08 nm f=0.0000 <S\*\*2>=2.000

395A -> 438A 0.29257  
396A -> 437A 0.34977  
397A -> 437A 0.12980  
401A -> 437A -0.13859  
411A -> 438A 0.13182  
412A -> 437A -0.12558  
415A -> 437A 0.15492  
419A -> 438A -0.22223  
420A -> 437A -0.17880  
435A -> 439A -0.17989  
395B -> 438B -0.29255  
396B -> 437B -0.34977  
397B -> 437B -0.12980  
401B -> 437B 0.13867  
411B -> 438B -0.13186  
412B -> 437B 0.12578  
415B -> 437B -0.15503  
419B -> 438B 0.22235  
420B -> 437B 0.17877  
435B -> 439B 0.18039

Excited State 87: 3.000-A 2.3966 eV 517.33 nm f=0.0000 <S\*\*2>=2.000

395A -> 437A -0.17395  
396A -> 438A -0.15009  
412A -> 438A 0.11575  
417A -> 438A 0.12390  
419A -> 437A 0.14695  
420A -> 438A 0.14857  
433A -> 439A 0.13411  
435A -> 440A 0.54732  
395B -> 437B 0.17398

396B -> 438B 0.15011  
412B -> 438B -0.11580  
417B -> 438B -0.12394  
419B -> 437B -0.14718  
420B -> 438B -0.14877  
433B -> 439B -0.13359  
435B -> 440B -0.54510

Excited State 88: 3.000-A 2.3985 eV 516.93 nm f=0.0000 <S\*\*2>=2.000

395A -> 437A 0.23056  
396A -> 438A 0.19913  
411A -> 437A 0.10795  
412A -> 438A -0.16220  
416A -> 438A -0.11768  
417A -> 438A -0.17007  
419A -> 437A -0.21888  
420A -> 438A -0.20509  
435A -> 440A 0.40977  
395B -> 437B -0.23058  
396B -> 438B -0.19914  
411B -> 437B -0.10811  
412B -> 438B 0.16225  
416B -> 438B 0.11800  
417B -> 438B 0.16999  
419B -> 437B 0.21949  
420B -> 438B 0.20536  
435B -> 440B -0.39768

Excited State 89: 1.000-A 2.3988 eV 516.87 nm f=0.0002 <S\*\*2>=0.000

433A -> 439A 0.16295  
435A -> 440A 0.67907  
433B -> 439B 0.16512  
435B -> 440B 0.68797

Excited State 90: 1.000-A 2.4055 eV 515.43 nm f=0.0217 <S\*\*2>=0.000

412A -> 438A 0.10774

|              |          |
|--------------|----------|
| 413A -> 437A | 0.48459  |
| 416A -> 438A | -0.21945 |
| 417A -> 438A | 0.22757  |
| 419A -> 437A | -0.29828 |
| 420A -> 438A | -0.10250 |
| 412B -> 438B | 0.10786  |
| 413B -> 437B | 0.48463  |
| 416B -> 438B | -0.21926 |
| 417B -> 438B | 0.22773  |
| 419B -> 437B | -0.29801 |
| 420B -> 438B | -0.10219 |

Excited State 91: 1.000-A 2.4310 eV 510.01 nm f=0.0010 <S\*\*2>=0.000

|              |          |
|--------------|----------|
| 411A -> 437A | -0.10480 |
| 412A -> 438A | 0.27156  |
| 416A -> 438A | 0.14111  |
| 417A -> 438A | 0.38198  |
| 418A -> 437A | 0.17151  |
| 419A -> 437A | 0.27387  |
| 420A -> 438A | 0.32533  |
| 411B -> 437B | -0.10453 |
| 412B -> 438B | 0.27179  |
| 416B -> 438B | 0.14131  |
| 417B -> 438B | 0.38224  |
| 418B -> 437B | 0.17237  |
| 419B -> 437B | 0.27510  |
| 420B -> 438B | 0.32568  |

Excited State 92: 3.000-A 2.4356 eV 509.04 nm f=0.0000 <S\*\*2>=2.000

|              |          |
|--------------|----------|
| 394A -> 437A | -0.10143 |
| 395A -> 437A | 0.24525  |
| 396A -> 438A | 0.21463  |
| 403A -> 438A | -0.10487 |
| 412A -> 438A | 0.11105  |
| 413A -> 437A | -0.10429 |
| 414A -> 437A | 0.19638  |

|              |          |
|--------------|----------|
| 415A -> 438A | 0.10142  |
| 417A -> 438A | 0.11131  |
| 418A -> 437A | 0.24299  |
| 419A -> 437A | 0.38607  |
| 420A -> 438A | 0.13887  |
| 394B -> 437B | 0.10146  |
| 395B -> 437B | -0.24533 |
| 396B -> 438B | -0.21469 |
| 403B -> 438B | 0.10504  |
| 412B -> 438B | -0.11008 |
| 413B -> 437B | 0.10453  |
| 414B -> 437B | -0.19642 |
| 415B -> 438B | -0.10165 |
| 417B -> 438B | -0.11003 |
| 418B -> 437B | -0.24235 |
| 419B -> 437B | -0.38494 |
| 420B -> 438B | -0.13769 |

Excited State 93: 1.000-A 2.4513 eV 505.79 nm f=0.0024 <S\*\*2>=0.000

|              |          |
|--------------|----------|
| 403A -> 437A | 0.10108  |
| 411A -> 438A | -0.11874 |
| 412A -> 437A | 0.36129  |
| 413A -> 438A | 0.13997  |
| 416A -> 437A | 0.10622  |
| 417A -> 437A | -0.12130 |
| 418A -> 438A | 0.21253  |
| 419A -> 438A | 0.42121  |
| 420A -> 437A | 0.17914  |
| 403B -> 437B | 0.10087  |
| 411B -> 438B | -0.11869 |
| 412B -> 437B | 0.36187  |
| 413B -> 438B | 0.14006  |
| 416B -> 437B | 0.10653  |
| 417B -> 437B | -0.12184 |
| 418B -> 438B | 0.21299  |
| 419B -> 438B | 0.42161  |

420B -> 437B 0.17953

Excited State 94: 3.000-A 2.4602 eV 503.97 nm f=0.0000 <S\*\*2>=2.000

395A -> 438A 0.11111  
396A -> 437A 0.13159  
398A -> 437A -0.10221  
412A -> 437A 0.30913  
414A -> 438A 0.15078  
415A -> 437A 0.24254  
416A -> 437A 0.15824  
417A -> 437A -0.27362  
418A -> 438A 0.21923  
419A -> 438A 0.21067  
420A -> 437A 0.22564  
395B -> 438B -0.11114  
396B -> 437B -0.13161  
398B -> 437B 0.10236  
412B -> 437B -0.30857  
414B -> 438B -0.15099  
415B -> 437B -0.24311  
416B -> 437B -0.15793  
417B -> 437B 0.27341  
418B -> 438B -0.21883  
419B -> 438B -0.20971  
420B -> 437B -0.22532

Excited State 95: 3.000-A 2.4753 eV 500.88 nm f=0.0000 <S\*\*2>=2.000

398A -> 437A -0.14782  
399A -> 438A 0.13227  
403A -> 437A 0.11412  
411A -> 438A 0.24233  
412A -> 437A 0.10944  
413A -> 438A -0.13546  
414A -> 438A -0.14057  
415A -> 437A -0.14002  
417A -> 437A -0.32864



|              |          |
|--------------|----------|
| 419A -> 438A | -0.34359 |
| 421A -> 438A | 0.10598  |
| 398B -> 437B | 0.14783  |
| 399B -> 438B | -0.13228 |
| 403B -> 437B | -0.11420 |
| 411B -> 438B | -0.24243 |
| 412B -> 437B | -0.10961 |
| 413B -> 438B | 0.13545  |
| 414B -> 438B | 0.14082  |
| 415B -> 437B | 0.14048  |
| 417B -> 437B | 0.32869  |
| 419B -> 438B | 0.34375  |
| 421B -> 438B | -0.10598 |

Excited State 96: 3.000-A 2.4786 eV 500.23 nm f=0.0000 <S\*\*2>=2.000

|              |          |
|--------------|----------|
| 398A -> 438A | -0.12213 |
| 399A -> 437A | 0.13471  |
| 411A -> 437A | 0.27846  |
| 413A -> 437A | -0.27204 |
| 414A -> 437A | -0.36379 |
| 414A -> 440A | -0.17662 |
| 415A -> 438A | -0.20006 |
| 415A -> 439A | 0.17156  |
| 398B -> 438B | 0.12215  |
| 399B -> 437B | -0.13477 |
| 411B -> 437B | -0.27876 |
| 413B -> 437B | 0.27199  |
| 414B -> 437B | 0.36489  |
| 414B -> 440B | 0.17664  |
| 415B -> 438B | 0.20069  |
| 415B -> 439B | -0.17158 |

Excited State 97: 1.000-A 2.4837 eV 499.19 nm f=0.0005 <S\*\*2>=0.000

|              |         |
|--------------|---------|
| 412A -> 437A | 0.11577 |
| 414A -> 438A | 0.32799 |
| 415A -> 437A | 0.58339 |

412B -> 437B 0.11567  
414B -> 438B 0.32838  
415B -> 437B 0.58436

Excited State 98: 1.000-A 2.4864 eV 498.65 nm f=0.0011 <S\*\*2>=0.000

414A -> 437A 0.60351  
415A -> 438A 0.33857  
414B -> 437B 0.60332  
415B -> 438B 0.33840

Excited State 99: 3.000-A 2.4876 eV 498.42 nm f=0.0000 <S\*\*2>=2.000

395A -> 438A -0.14432  
396A -> 437A -0.17273  
414A -> 438A 0.17764  
414A -> 439A -0.29581  
415A -> 437A 0.34453  
415A -> 440A 0.28587  
416A -> 437A -0.13281  
418A -> 438A -0.12756  
419A -> 438A -0.19974  
395B -> 438B 0.14433  
396B -> 437B 0.17275  
414B -> 438B -0.17659  
414B -> 439B 0.29579  
415B -> 437B -0.34275  
415B -> 440B -0.28585  
416B -> 437B 0.13256  
418B -> 438B 0.12766  
419B -> 438B 0.19969

Excited State 100: 3.000-A 2.4921 eV 497.51 nm f=0.0000 <S\*\*2>=2.000

395A -> 437A -0.14336  
396A -> 438A -0.12592  
399A -> 437A 0.10122  
403A -> 438A 0.10161  
411A -> 437A 0.22240

|              |          |
|--------------|----------|
| 413A -> 437A | -0.28611 |
| 414A -> 437A | 0.20481  |
| 414A -> 440A | 0.26458  |
| 415A -> 438A | 0.11670  |
| 415A -> 439A | -0.25721 |
| 418A -> 437A | -0.12016 |
| 420A -> 438A | -0.15079 |
| 395B -> 437B | 0.14334  |
| 396B -> 438B | 0.12590  |
| 399B -> 437B | -0.10125 |
| 403B -> 438B | -0.10163 |
| 411B -> 437B | -0.22271 |
| 413B -> 437B | 0.28617  |
| 414B -> 437B | -0.20400 |
| 414B -> 440B | -0.26458 |
| 415B -> 438B | -0.11619 |
| 415B -> 439B | 0.25721  |
| 418B -> 437B | 0.12014  |
| 420B -> 438B | 0.15105  |

Excited State 101: 1.000-A 2.5109 eV 493.79 nm f=0.0098 <S\*\*2>=0.000

|              |          |
|--------------|----------|
| 399A -> 437A | 0.10226  |
| 400A -> 437A | 0.10911  |
| 403A -> 438A | -0.12858 |
| 411A -> 437A | 0.35714  |
| 413A -> 437A | -0.26231 |
| 417A -> 438A | 0.31283  |
| 419A -> 437A | 0.16064  |
| 420A -> 438A | -0.26141 |
| 399B -> 437B | 0.10205  |
| 400B -> 437B | 0.10924  |
| 403B -> 438B | -0.12873 |
| 411B -> 437B | 0.35669  |
| 413B -> 437B | -0.26211 |
| 417B -> 438B | 0.31354  |
| 419B -> 437B | 0.16068  |

420B -> 438B -0.26183

Excited State 102: 3.000-A 2.5143 eV 493.11 nm f=0.0000 <S\*\*2>=2.000

414A -> 438A -0.16180

414A -> 439A -0.34240

415A -> 437A -0.33660

415A -> 440A 0.33787

416A -> 437A 0.11767

416A -> 440A -0.10409

419A -> 438A 0.14517

414B -> 438B 0.16161

414B -> 439B 0.34242

415B -> 437B 0.33630

415B -> 440B -0.33787

416B -> 437B -0.11766

416B -> 440B 0.10408

419B -> 438B -0.14537

Excited State 103: 3.000-A 2.5145 eV 493.08 nm f=0.0000 <S\*\*2>=2.000

413A -> 437A -0.10538

414A -> 437A 0.32953

414A -> 440A -0.31742

415A -> 438A 0.15099

415A -> 439A 0.30336

417A -> 438A 0.13468

418A -> 437A -0.16952

420A -> 438A -0.17206

434A -> 439A 0.15414

413B -> 437B 0.10502

414B -> 437B -0.32931

414B -> 440B 0.31742

415B -> 438B -0.15090

415B -> 439B -0.30339

417B -> 438B -0.13443

418B -> 437B 0.16967

420B -> 438B 0.17197

434B -> 439B -0.15415

Excited State 104: 1.000-A 2.5174 eV 492.50 nm f=0.0038 <S\*\*2>=0.000

412A -> 437A -0.23492

413A -> 438A -0.19097

415A -> 437A 0.11904

417A -> 437A 0.28256

418A -> 438A -0.14158

419A -> 438A 0.47620

420A -> 437A -0.16584

421A -> 438A -0.11241

412B -> 437B -0.23472

413B -> 438B -0.19144

415B -> 437B 0.11938

417B -> 437B 0.28249

418B -> 438B -0.14189

419B -> 438B 0.47650

420B -> 437B -0.16604

421B -> 438B -0.11250

Excited State 105: 3.000-A 2.5211 eV 491.79 nm f=0.0000 <S\*\*2>=2.000

411A -> 437A 0.12361

414A -> 437A 0.16987

415A -> 438A 0.11262

417A -> 438A -0.44012

418A -> 437A 0.14867

419A -> 437A -0.11805

420A -> 438A 0.35169

411B -> 437B -0.12461

414B -> 437B -0.16970

415B -> 438B -0.11249

417B -> 438B 0.44030

418B -> 437B -0.14921

419B -> 437B 0.11796

420B -> 438B -0.35211

Excited State 106: 3.000-A 2.5266 eV 490.71 nm f=0.0000 <S\*\*2>=2.000

414A -> 440A -0.11356  
415A -> 439A 0.10972  
431A -> 440A 0.17284  
434A -> 439A -0.63475  
414B -> 440B 0.11356  
415B -> 439B -0.10973  
431B -> 440B -0.17285  
434B -> 439B 0.63476

Excited State 107: 3.000-A 2.5279 eV 490.47 nm f=0.0000 <S\*\*2>=2.000

409A -> 437A -0.12117  
411A -> 438A 0.14032  
413A -> 438A -0.36469  
415A -> 437A 0.14230  
418A -> 438A -0.23827  
419A -> 438A 0.34075  
420A -> 437A -0.21939  
421A -> 438A -0.11537  
409B -> 437B 0.12126  
411B -> 438B -0.14057  
413B -> 438B 0.36472  
415B -> 437B -0.14213  
418B -> 438B 0.23825  
419B -> 438B -0.34014  
420B -> 437B 0.21927  
421B -> 438B 0.11529

Excited State 108: 1.000-A 2.5287 eV 490.31 nm f=0.0066 <S\*\*2>=0.000

398A -> 438A -0.13536  
399A -> 437A 0.11447  
400A -> 437A 0.17051  
403A -> 438A -0.17137  
411A -> 437A 0.31092  
417A -> 438A -0.25310  
418A -> 437A 0.30226

420A -> 438A 0.34562  
398B -> 438B -0.13516  
399B -> 437B 0.11435  
400B -> 437B 0.17059  
403B -> 438B -0.17147  
411B -> 437B 0.31067  
417B -> 438B -0.25212  
418B -> 437B 0.30180  
420B -> 438B 0.34484

Excited State 109: 3.000-A 2.5378 eV 488.55 nm f=0.0000 <S\*\*2>=2.000

431A -> 439A 0.19371  
434A -> 440A -0.64837  
431B -> 439B -0.19371  
434B -> 440B 0.64838

Excited State 110: 1.000-A 2.5387 eV 488.37 nm f=0.0019 <S\*\*2>=0.000

431A -> 440A -0.16746  
434A -> 439A 0.67421  
431B -> 440B -0.16746  
434B -> 439B 0.67420

Excited State 111: 1.000-A 2.5487 eV 486.45 nm f=0.0005 <S\*\*2>=0.000

431A -> 439A -0.17678  
434A -> 440A 0.66265  
431B -> 439B -0.17678  
434B -> 440B 0.66265

Excited State 112: 1.000-A 2.5489 eV 486.42 nm f=0.0039 <S\*\*2>=0.000

398A -> 437A 0.15381  
399A -> 438A -0.13323  
400A -> 438A -0.16731  
403A -> 437A 0.26739  
409A -> 437A 0.16537  
411A -> 438A -0.28432  
412A -> 437A -0.26797

413A -> 438A 0.29693  
434A -> 440A -0.11050  
398B -> 437B 0.15368  
399B -> 438B -0.13313  
400B -> 438B -0.16734  
403B -> 437B 0.26744  
409B -> 437B 0.16525  
411B -> 438B -0.28413  
412B -> 437B -0.26790  
413B -> 438B 0.29671  
434B -> 440B -0.11048

Excited State 113: 1.000-A 2.5584 eV 484.61 nm f=0.0006 <S\*\*2>=0.000

398A -> 437A -0.13557  
400A -> 438A 0.16766  
403A -> 437A -0.27563  
412A -> 437A -0.34048  
413A -> 438A 0.18781  
418A -> 438A 0.37365  
419A -> 438A 0.10229  
420A -> 437A 0.16249  
398B -> 437B -0.13563  
400B -> 438B 0.16754  
403B -> 437B -0.27549  
412B -> 437B -0.34069  
413B -> 438B 0.18758  
418B -> 438B 0.37381  
419B -> 438B 0.10242  
420B -> 437B 0.16254

Excited State 114: 3.000-A 2.5625 eV 483.84 nm f=0.0000 <S\*\*2>=2.000

431A -> 443A 0.15594  
434A -> 444A 0.26418  
436A -> 443A -0.57790  
431B -> 443B -0.15594  
434B -> 444B -0.26418



436B -> 443B 0.57790

Excited State 115: 3.000-A 2.5720 eV 482.06 nm f=0.0000 <S\*\*2>=2.000

409A -> 437A 0.19839

410A -> 438A -0.12435

411A -> 438A -0.17825

412A -> 437A 0.22354

413A -> 438A 0.21527

416A -> 437A 0.28222

418A -> 438A -0.41548

420A -> 437A -0.15128

409B -> 437B -0.19906

410B -> 438B 0.12448

411B -> 438B 0.17847

412B -> 437B -0.22341

413B -> 438B -0.21656

416B -> 437B -0.28345

418B -> 438B 0.41638

420B -> 437B 0.15149

Excited State 116: 1.000-A 2.5786 eV 480.82 nm f=0.0001 <S\*\*2>=0.000

400A -> 438A 0.11989

403A -> 437A -0.22115

409A -> 437A 0.17510

413A -> 438A 0.33252

416A -> 437A 0.35558

418A -> 438A -0.33715

400B -> 438B 0.11971

403B -> 437B -0.22088

409B -> 437B 0.17432

413B -> 438B 0.33192

416B -> 437B 0.35469

418B -> 438B -0.33578

Excited State 117: 3.000-A 2.5819 eV 480.21 nm f=0.0000 <S\*\*2>=2.000

410A -> 437A 0.12652

412A -> 438A -0.13602  
413A -> 437A -0.20301  
415A -> 438A -0.11868  
416A -> 438A -0.48187  
417A -> 438A 0.13105  
418A -> 437A 0.26716  
420A -> 438A 0.14351  
410B -> 437B -0.12666  
412B -> 438B 0.13631  
413B -> 437B 0.20403  
415B -> 438B 0.11927  
416B -> 438B 0.48397  
417B -> 438B -0.13143  
418B -> 437B -0.26812  
420B -> 438B -0.14376

Excited State 118: 1.000-A 2.5870 eV 479.25 nm f=0.0006 <S\*\*2>=0.000

411A -> 437A 0.29172  
413A -> 437A 0.24319  
415A -> 438A 0.13845  
416A -> 438A 0.48870  
418A -> 437A -0.23990  
411B -> 437B 0.29341  
413B -> 437B 0.24331  
415B -> 438B 0.13838  
416B -> 438B 0.48794  
418B -> 437B -0.23913

Excited State 119: 3.000-A 2.5891 eV 478.87 nm f=0.0000 <S\*\*2>=2.000

410A -> 437A 0.14428  
411A -> 437A 0.21381  
412A -> 438A -0.17468  
413A -> 437A 0.12643  
416A -> 438A 0.17552  
431A -> 444A -0.12822  
434A -> 443A -0.25941

|              |          |
|--------------|----------|
| 436A -> 442A | 0.14441  |
| 436A -> 444A | 0.41584  |
| 410B -> 437B | -0.14451 |
| 411B -> 437B | -0.21219 |
| 412B -> 438B | 0.17523  |
| 413B -> 437B | -0.12494 |
| 416B -> 438B | -0.17249 |
| 431B -> 444B | 0.12822  |
| 434B -> 443B | 0.25941  |
| 436B -> 442B | -0.14437 |
| 436B -> 444B | -0.41584 |

Excited State 120: 3.000-A 2.5932 eV 478.11 nm f=0.0000 <S\*\*2>=2.000

|              |          |
|--------------|----------|
| 409A -> 437A | -0.16967 |
| 410A -> 438A | 0.16508  |
| 411A -> 438A | 0.25344  |
| 412A -> 437A | -0.32640 |
| 413A -> 438A | 0.34600  |
| 415A -> 437A | 0.10968  |
| 416A -> 437A | 0.27158  |
| 418A -> 438A | -0.12248 |
| 419A -> 438A | 0.10534  |
| 409B -> 437B | 0.17007  |
| 410B -> 438B | -0.16525 |
| 411B -> 438B | -0.25376 |
| 412B -> 437B | 0.32631  |
| 413B -> 438B | -0.34595 |
| 415B -> 437B | -0.10973 |
| 416B -> 437B | -0.27149 |
| 418B -> 438B | 0.12251  |
| 419B -> 438B | -0.10526 |

Excited State 121: 3.000-A 2.5935 eV 478.07 nm f=0.0000 <S\*\*2>=2.000

|              |          |
|--------------|----------|
| 410A -> 437A | 0.28503  |
| 411A -> 437A | 0.28287  |
| 412A -> 438A | -0.29886 |

|              |          |
|--------------|----------|
| 413A -> 437A | 0.10892  |
| 416A -> 438A | 0.10187  |
| 417A -> 438A | 0.11539  |
| 434A -> 443A | 0.17474  |
| 436A -> 444A | -0.28649 |
| 410B -> 437B | -0.28579 |
| 411B -> 437B | -0.28289 |
| 412B -> 438B | 0.29927  |
| 413B -> 437B | -0.10846 |
| 416B -> 438B | -0.10080 |
| 417B -> 438B | -0.11560 |
| 434B -> 443B | -0.17474 |
| 436B -> 444B | 0.28651  |

Excited State 122: 1.000-A 2.5997 eV 476.91 nm f=0.0070 <S\*\*2>=0.000

|              |          |
|--------------|----------|
| 398A -> 438A | -0.15453 |
| 399A -> 437A | 0.17617  |
| 400A -> 437A | 0.33789  |
| 403A -> 438A | -0.29754 |
| 409A -> 438A | 0.15317  |
| 410A -> 437A | -0.23193 |
| 411A -> 437A | -0.27055 |
| 416A -> 438A | 0.15879  |
| 398B -> 438B | -0.15431 |
| 399B -> 437B | 0.17600  |
| 400B -> 437B | 0.33776  |
| 403B -> 438B | -0.29747 |
| 409B -> 438B | 0.15295  |
| 410B -> 437B | -0.23113 |
| 411B -> 437B | -0.26972 |
| 416B -> 438B | 0.15886  |

Excited State 123: 1.000-A 2.6137 eV 474.36 nm f=0.0184 <S\*\*2>=0.000

|              |          |
|--------------|----------|
| 410A -> 437A | -0.29373 |
| 412A -> 438A | 0.55253  |
| 416A -> 438A | -0.10238 |

417A -> 438A -0.20288  
410B -> 437B -0.29348  
412B -> 438B 0.55215  
416B -> 438B -0.10231  
417B -> 438B -0.20273

Excited State 124: 1.000-A 2.6227 eV 472.73 nm f=0.0054 <S\*\*2>=0.000

400A -> 438A 0.11454  
403A -> 437A -0.17060  
409A -> 437A 0.40277  
410A -> 438A -0.24824  
411A -> 438A -0.31903  
413A -> 438A -0.21904  
416A -> 437A -0.13443  
418A -> 438A 0.15104  
400B -> 438B 0.11443  
403B -> 437B -0.17048  
409B -> 437B 0.40279  
410B -> 438B -0.24817  
411B -> 438B -0.31875  
413B -> 438B -0.21881  
416B -> 437B -0.13425  
418B -> 438B 0.15105

Excited State 125: 1.000-A 2.6421 eV 469.26 nm f=0.0000 <S\*\*2>=0.000

399A -> 437A 0.15045  
400A -> 437A 0.14244  
401A -> 438A 0.10727  
403A -> 438A -0.10008  
404A -> 437A -0.16075  
405A -> 437A -0.14447  
408A -> 437A 0.17660  
409A -> 438A -0.16042  
410A -> 437A 0.38508  
411A -> 437A -0.16293  
412A -> 438A 0.22593

|              |          |
|--------------|----------|
| 413A -> 437A | -0.11347 |
| 417A -> 438A | -0.12117 |
| 418A -> 437A | -0.11145 |
| 399B -> 437B | 0.14994  |
| 400B -> 437B | 0.14336  |
| 401B -> 438B | 0.10745  |
| 403B -> 438B | -0.10072 |
| 404B -> 437B | -0.16115 |
| 405B -> 437B | -0.14487 |
| 408B -> 437B | 0.17850  |
| 409B -> 438B | -0.16242 |
| 410B -> 437B | 0.38838  |
| 411B -> 437B | -0.16406 |
| 412B -> 438B | 0.22825  |
| 413B -> 437B | -0.11444 |
| 417B -> 438B | -0.12220 |
| 418B -> 437B | -0.11249 |

Excited State 126: 3.000-A 2.6456 eV 468.64 nm f=0.0000 <S\*\*2>=2.000

|              |          |
|--------------|----------|
| 400A -> 437A | 0.11268  |
| 408A -> 437A | 0.24765  |
| 409A -> 438A | -0.25111 |
| 410A -> 437A | 0.39916  |
| 411A -> 437A | -0.13095 |
| 412A -> 438A | 0.27796  |
| 413A -> 437A | -0.11879 |
| 417A -> 438A | -0.12193 |
| 418A -> 437A | -0.12621 |
| 400B -> 437B | -0.11158 |
| 408B -> 437B | -0.24630 |
| 409B -> 438B | 0.24984  |
| 410B -> 437B | -0.39596 |
| 411B -> 437B | 0.12959  |
| 412B -> 438B | -0.27617 |
| 413B -> 437B | 0.11785  |
| 417B -> 438B | 0.12096  |

418B -> 437B 0.12531

Excited State 127: 3.000-A 2.6518 eV 467.55 nm f=0.0000 <S\*\*2>=2.000

398A -> 437A 0.17925

401A -> 437A 0.18858

403A -> 437A -0.16396

405A -> 438A -0.12593

407A -> 437A 0.23471

408A -> 438A 0.20360

409A -> 437A -0.37022

410A -> 438A 0.25152

418A -> 438A -0.14231

419A -> 438A -0.10871

398B -> 437B -0.17925

401B -> 437B -0.18896

403B -> 437B 0.16430

405B -> 438B 0.12610

407B -> 437B -0.23528

408B -> 438B -0.20390

409B -> 437B 0.37038

410B -> 438B -0.25171

418B -> 438B 0.14234

419B -> 438B 0.10882

Excited State 128: 3.000-A 2.6590 eV 466.28 nm f=0.0000 <S\*\*2>=2.000

404A -> 437A -0.36943

405A -> 437A 0.27684

408A -> 437A -0.36103

410A -> 437A 0.26148

411A -> 437A -0.23684

404B -> 437B 0.37112

405B -> 437B -0.27796

408B -> 437B 0.36290

410B -> 437B -0.26202

411B -> 437B 0.23738

Excited State 129: 3.000-A 2.6599 eV 466.13 nm f=0.0000 <S\*\*2>=2.000

|              |          |
|--------------|----------|
| 398A -> 437A | -0.19553 |
| 401A -> 437A | -0.12822 |
| 402A -> 438A | -0.17672 |
| 403A -> 437A | 0.14371  |
| 404A -> 438A | 0.21656  |
| 407A -> 437A | -0.20911 |
| 409A -> 437A | -0.34255 |
| 411A -> 438A | -0.32058 |
| 414A -> 438A | 0.16228  |
| 398B -> 437B | 0.19575  |
| 401B -> 437B | 0.12897  |
| 402B -> 438B | 0.17719  |
| 403B -> 437B | -0.14373 |
| 404B -> 438B | -0.21734 |
| 407B -> 437B | 0.20982  |
| 409B -> 437B | 0.34331  |
| 411B -> 438B | 0.32144  |
| 414B -> 438B | -0.16280 |

Excited State 130: 1.000-A 2.6680 eV 464.71 nm f=0.0034 <S\*\*2>=0.000

|              |          |
|--------------|----------|
| 402A -> 437A | -0.12568 |
| 404A -> 437A | 0.42567  |
| 405A -> 437A | -0.18965 |
| 408A -> 437A | 0.41576  |
| 409A -> 438A | -0.15037 |
| 410A -> 437A | -0.13897 |
| 411A -> 437A | 0.12684  |
| 402B -> 437B | -0.12552 |
| 404B -> 437B | 0.42462  |
| 405B -> 437B | -0.18833 |
| 408B -> 437B | 0.41415  |
| 409B -> 438B | -0.15041 |
| 410B -> 437B | -0.13775 |
| 411B -> 437B | 0.12564  |



Excited State 131: 1.000-A 2.6683 eV 464.66 nm f=0.0191 <S\*\*2>=0.000

|              |          |
|--------------|----------|
| 396A -> 437A | -0.10197 |
| 399A -> 438A | 0.11668  |
| 401A -> 437A | 0.30207  |
| 403A -> 437A | -0.12973 |
| 404A -> 438A | -0.14489 |
| 405A -> 438A | -0.11250 |
| 406A -> 437A | -0.22194 |
| 407A -> 437A | 0.36318  |
| 408A -> 438A | 0.13910  |
| 410A -> 438A | 0.20584  |
| 413A -> 438A | -0.14480 |
| 435A -> 441A | -0.10647 |
| 396B -> 437B | -0.10210 |
| 399B -> 438B | 0.11691  |
| 401B -> 437B | 0.30159  |
| 403B -> 437B | -0.12929 |
| 404B -> 438B | -0.14443 |
| 405B -> 438B | -0.11228 |
| 406B -> 437B | -0.22180 |
| 407B -> 437B | 0.36257  |
| 408B -> 438B | 0.13893  |
| 410B -> 438B | 0.20546  |
| 413B -> 438B | -0.14471 |
| 435B -> 441B | -0.10646 |

Excited State 132: 1.000-A 2.6714 eV 464.12 nm f=0.0001 <S\*\*2>=0.000

|              |          |
|--------------|----------|
| 400A -> 438A | -0.10558 |
| 402A -> 438A | 0.15799  |
| 404A -> 438A | -0.22061 |
| 408A -> 438A | -0.16719 |
| 409A -> 437A | 0.38690  |
| 411A -> 438A | 0.36386  |
| 414A -> 438A | -0.19166 |
| 415A -> 437A | 0.12575  |
| 419A -> 438A | 0.10704  |

|              |          |
|--------------|----------|
| 400B -> 438B | -0.10548 |
| 402B -> 438B | 0.15753  |
| 404B -> 438B | -0.22016 |
| 408B -> 438B | -0.16688 |
| 409B -> 437B | 0.38591  |
| 411B -> 438B | 0.36309  |
| 414B -> 438B | -0.19125 |
| 415B -> 437B | 0.12550  |
| 419B -> 438B | 0.10676  |

Excited State 133: 3.000-A 2.6745 eV 463.58 nm f=0.0000 <S\*\*2>=2.000

|              |          |
|--------------|----------|
| 398A -> 438A | -0.21445 |
| 399A -> 437A | 0.15922  |
| 401A -> 438A | -0.12952 |
| 402A -> 437A | -0.13715 |
| 403A -> 438A | 0.13915  |
| 404A -> 437A | 0.34258  |
| 405A -> 437A | 0.14437  |
| 407A -> 438A | -0.15827 |
| 409A -> 438A | -0.22854 |
| 410A -> 437A | 0.13815  |
| 411A -> 437A | -0.17381 |
| 412A -> 438A | -0.23422 |
| 415A -> 438A | -0.13407 |
| 398B -> 438B | 0.21442  |
| 399B -> 437B | -0.15905 |
| 401B -> 438B | 0.12985  |
| 402B -> 437B | 0.13718  |
| 403B -> 438B | -0.13913 |
| 404B -> 437B | -0.34247 |
| 405B -> 437B | -0.14535 |
| 407B -> 438B | 0.15850  |
| 409B -> 438B | 0.22883  |
| 410B -> 437B | -0.13889 |
| 411B -> 437B | 0.17425  |
| 412B -> 438B | 0.23408  |

415B -> 438B 0.13417

Excited State 134: 1.000-A 2.6850 eV 461.77 nm f=0.0078 <S\*\*2>=0.000

395A -> 437A 0.10048

399A -> 437A -0.13548

401A -> 438A -0.17521

404A -> 437A 0.24299

405A -> 437A 0.40569

409A -> 438A -0.24177

410A -> 437A 0.24578

411A -> 437A -0.14018

433A -> 441A -0.10023

435A -> 442A 0.13607

395B -> 437B 0.10048

399B -> 437B -0.13573

401B -> 438B -0.17487

404B -> 437B 0.24273

405B -> 437B 0.40544

409B -> 438B -0.24129

410B -> 437B 0.24544

411B -> 437B -0.13971

433B -> 441B -0.10021

435B -> 442B 0.13605

Excited State 135: 2.993-A 2.6920 eV 460.57 nm f=0.0000 <S\*\*2>=1.990

404A -> 437A -0.17368

405A -> 437A -0.10469

414A -> 437A 0.28740

415A -> 438A -0.50438

416A -> 438A 0.12971

404B -> 437B 0.18393

405B -> 437B 0.10859

414B -> 437B -0.33393

415B -> 438B 0.58534

416B -> 438B -0.15140

Excited State 136: 1.020-A 2.6921 eV 460.55 nm f=0.0000 <S\*\*2>=0.010

414A -> 437A -0.35015

415A -> 438A 0.60878

416A -> 438A -0.16300

414B -> 437B -0.30603

415B -> 438B 0.53148

416B -> 438B -0.14305

Excited State 137: 3.000-A 2.6958 eV 459.91 nm f=0.0000 <S\*\*2>=2.000

431A -> 440A 0.11303

432A -> 439A 0.29891

433A -> 439A 0.59179

435A -> 440A -0.14815

431B -> 440B -0.11301

432B -> 439B -0.29887

433B -> 439B -0.59163

435B -> 440B 0.14812

Excited State 138: 1.018-A 2.6962 eV 459.85 nm f=0.0030 <S\*\*2>=0.009

401A -> 437A 0.11707

404A -> 438A -0.16112

409A -> 437A 0.11952

414A -> 438A 0.49972

415A -> 437A -0.25506

401B -> 437B 0.12368

404B -> 438B -0.18266

405B -> 438B -0.10517

407B -> 437B -0.10971

409B -> 437B 0.13291

414B -> 438B 0.57535

415B -> 437B -0.29430

Excited State 139: 2.994-A 2.6963 eV 459.82 nm f=0.0000 <S\*\*2>=1.991

404A -> 438A -0.16971

409A -> 437A 0.10744

411A -> 438A 0.12233

414A -> 438A 0.59332  
415A -> 437A -0.30785  
404B -> 438B 0.14638  
411B -> 438B -0.11229  
414B -> 438B -0.52043  
415B -> 437B 0.27058

Excited State 140: 1.000-A 2.7032 eV 458.65 nm f=0.0002 <S\*\*2>=0.000

432A -> 439A 0.19076  
433A -> 439A 0.65244  
435A -> 440A -0.15961  
432B -> 439B 0.19084  
433B -> 439B 0.65257  
435B -> 440B -0.15965

Excited State 141: 3.000-A 2.7064 eV 458.11 nm f=0.0000 <S\*\*2>=2.000

431A -> 439A 0.10725  
432A -> 440A 0.26321  
433A -> 440A 0.60332  
435A -> 439A -0.14092  
431B -> 439B -0.10723  
432B -> 440B -0.26315  
433B -> 440B -0.60309  
435B -> 439B 0.14087

Excited State 142: 3.000-A 2.7078 eV 457.88 nm f=0.0000 <S\*\*2>=2.000

401A -> 437A 0.10870  
402A -> 438A -0.14338  
405A -> 438A -0.34174  
406A -> 437A 0.32582  
407A -> 437A -0.30517  
408A -> 438A 0.10816  
410A -> 438A -0.10304  
411A -> 438A 0.16916  
412A -> 437A 0.12729  
414A -> 438A -0.15860

|              |          |
|--------------|----------|
| 433A -> 440A | -0.11766 |
| 401B -> 437B | -0.10946 |
| 402B -> 438B | 0.14394  |
| 405B -> 438B | 0.34289  |
| 406B -> 437B | -0.32570 |
| 407B -> 437B | 0.30699  |
| 408B -> 438B | -0.10793 |
| 410B -> 438B | 0.10275  |
| 411B -> 438B | -0.16858 |
| 412B -> 437B | -0.12744 |
| 414B -> 438B | 0.15936  |
| 433B -> 440B | 0.11789  |

Excited State 143: 1.000-A 2.7104 eV 457.44 nm f=0.0075 <S\*\*2>=0.000

|              |          |
|--------------|----------|
| 398A -> 437A | 0.17503  |
| 399A -> 438A | -0.10776 |
| 401A -> 437A | -0.10724 |
| 402A -> 438A | 0.10312  |
| 405A -> 438A | 0.19519  |
| 406A -> 437A | 0.14723  |
| 407A -> 437A | 0.46220  |
| 408A -> 438A | 0.13815  |
| 410A -> 438A | -0.11568 |
| 411A -> 438A | 0.16600  |
| 414A -> 438A | 0.18224  |
| 415A -> 437A | -0.11073 |
| 433A -> 440A | 0.12740  |
| 398B -> 437B | 0.17490  |
| 399B -> 438B | -0.10666 |
| 401B -> 437B | -0.10642 |
| 402B -> 438B | 0.10304  |
| 405B -> 438B | 0.19426  |
| 406B -> 437B | 0.15190  |
| 407B -> 437B | 0.46661  |
| 408B -> 438B | 0.14226  |
| 410B -> 438B | -0.12068 |

411B -> 438B 0.16945  
414B -> 438B 0.18288  
415B -> 437B -0.11116  
433B -> 440B 0.12756

Excited State 144: 3.000-A 2.7116 eV 457.24 nm f=0.0000 <S\*\*2>=2.000

404A -> 438A 0.34021  
406A -> 437A 0.20605  
407A -> 437A 0.36198  
408A -> 438A 0.23405  
410A -> 438A -0.29178  
411A -> 438A 0.18556  
404B -> 438B -0.33970  
406B -> 437B -0.20454  
407B -> 437B -0.35562  
408B -> 438B -0.23243  
410B -> 438B 0.29056  
411B -> 438B -0.18353

Excited State 145: 1.000-A 2.7120 eV 457.17 nm f=0.0004 <S\*\*2>=0.000

432A -> 440A 0.17677  
433A -> 440A 0.64424  
435A -> 439A -0.14792  
432B -> 440B 0.17690  
433B -> 440B 0.64455  
435B -> 439B -0.14801

Excited State 146: 1.001-A 2.7227 eV 455.38 nm f=0.0028 <S\*\*2>=0.000

402A -> 437A 0.18987  
404A -> 437A -0.25886  
405A -> 437A 0.29399  
407A -> 438A 0.31563  
408A -> 437A 0.38938  
402B -> 437B 0.19489  
404B -> 437B -0.26026  
405B -> 437B 0.30385

407B -> 438B 0.32377  
408B -> 437B 0.39798

Excited State 147: 3.000-A 2.7237 eV 455.21 nm f=0.0000 <S\*\*2>=2.000

402A -> 437A 0.21066  
405A -> 437A 0.40333  
407A -> 438A 0.34166  
408A -> 437A 0.34966  
412A -> 438A -0.11054  
415A -> 438A -0.11404  
402B -> 437B -0.20604  
405B -> 437B -0.39607  
407B -> 438B -0.33390  
408B -> 437B -0.34005  
412B -> 438B 0.10951  
415B -> 438B 0.11229

Excited State 148: 1.000-A 2.7247 eV 455.04 nm f=0.0018 <S\*\*2>=0.000

399A -> 438A 0.10655  
401A -> 437A 0.22254  
402A -> 438A -0.12011  
404A -> 438A 0.12808  
405A -> 438A -0.25864  
406A -> 437A 0.41453  
408A -> 438A 0.23506  
410A -> 438A -0.23023  
411A -> 438A 0.12548  
399B -> 438B 0.10655  
401B -> 437B 0.22239  
402B -> 438B -0.11997  
404B -> 438B 0.12755  
405B -> 438B -0.25821  
406B -> 437B 0.41408  
408B -> 438B 0.23467  
410B -> 438B -0.22979  
411B -> 438B 0.12505



Excited State 149: 3.000-A 2.7390 eV 452.66 nm f=0.0000 <S\*\*2>=2.000

|              |          |
|--------------|----------|
| 431A -> 444A | -0.12019 |
| 432A -> 439A | 0.18591  |
| 432A -> 448A | 0.11650  |
| 433A -> 439A | -0.18374 |
| 434A -> 443A | -0.15308 |
| 436A -> 442A | -0.28425 |
| 436A -> 445A | 0.11750  |
| 436A -> 446A | 0.34178  |
| 436A -> 453A | -0.11701 |
| 436A -> 464A | 0.11060  |
| 431B -> 444B | 0.12019  |
| 432B -> 439B | -0.18591 |
| 432B -> 448B | -0.11650 |
| 433B -> 439B | 0.18375  |
| 434B -> 443B | 0.15308  |
| 436B -> 442B | 0.28423  |
| 436B -> 445B | -0.11751 |
| 436B -> 446B | -0.34178 |
| 436B -> 453B | 0.11700  |
| 436B -> 464B | -0.11060 |

Excited State 150: 3.000-A 2.7391 eV 452.65 nm f=0.0000 <S\*\*2>=2.000

|              |          |
|--------------|----------|
| 398A -> 437A | 0.10719  |
| 401A -> 437A | 0.14440  |
| 403A -> 437A | -0.13033 |
| 404A -> 438A | 0.40052  |
| 405A -> 438A | -0.11791 |
| 406A -> 437A | -0.42637 |
| 407A -> 437A | -0.22334 |
| 411A -> 438A | 0.12922  |
| 398B -> 437B | -0.10739 |
| 401B -> 437B | -0.14473 |
| 403B -> 437B | 0.13051  |
| 404B -> 438B | -0.40153 |

405B -> 438B 0.11810  
406B -> 437B 0.42695  
407B -> 437B 0.22338  
411B -> 438B -0.12974

Excited State 151: 3.000-A 2.7432 eV 451.97 nm f=0.0000 <S\*\*2>=2.000

398A -> 438A -0.14536  
401A -> 438A -0.21555  
402A -> 437A -0.10701  
403A -> 438A 0.20971  
404A -> 437A -0.34095  
406A -> 438A 0.25859  
407A -> 438A -0.12954  
408A -> 437A 0.23689  
409A -> 438A -0.15155  
410A -> 437A -0.15241  
415A -> 438A 0.12793  
398B -> 438B 0.14542  
401B -> 438B 0.21609  
402B -> 437B 0.10768  
403B -> 438B -0.21004  
404B -> 437B 0.34161  
406B -> 438B -0.25925  
407B -> 438B 0.13032  
408B -> 437B -0.23695  
409B -> 438B 0.15201  
410B -> 437B 0.15270  
415B -> 438B -0.12822

Excited State 152: 1.000-A 2.7528 eV 450.39 nm f=0.0021 <S\*\*2>=0.000

399A -> 437A -0.17380  
400A -> 437A 0.12377  
401A -> 438A -0.13586  
402A -> 437A -0.14480  
404A -> 437A -0.20382  
404A -> 438A 0.36154

|              |          |
|--------------|----------|
| 406A -> 437A | -0.28388 |
| 406A -> 438A | 0.17403  |
| 407A -> 438A | -0.15507 |
| 410A -> 438A | -0.11978 |
| 411A -> 438A | 0.16004  |
| 399B -> 437B | -0.17368 |
| 400B -> 437B | 0.12361  |
| 401B -> 438B | -0.13548 |
| 402B -> 437B | -0.14458 |
| 404B -> 437B | -0.20320 |
| 404B -> 438B | 0.36086  |
| 406B -> 437B | -0.28325 |
| 406B -> 438B | 0.17355  |
| 407B -> 438B | -0.15476 |
| 410B -> 438B | -0.11968 |
| 411B -> 438B | 0.15984  |

Excited State 153: 1.000-A 2.7528 eV 450.39 nm f=0.0026 <S\*\*2>=0.000

|              |          |
|--------------|----------|
| 399A -> 437A | 0.19311  |
| 400A -> 437A | -0.13773 |
| 401A -> 438A | 0.15073  |
| 402A -> 437A | 0.16151  |
| 404A -> 437A | 0.22665  |
| 404A -> 438A | 0.32438  |
| 406A -> 437A | -0.25531 |
| 406A -> 438A | -0.19456 |
| 407A -> 438A | 0.17349  |
| 409A -> 438A | 0.10215  |
| 410A -> 438A | -0.10746 |
| 411A -> 438A | 0.14395  |
| 399B -> 437B | 0.19298  |
| 400B -> 437B | -0.13756 |
| 401B -> 438B | 0.15031  |
| 402B -> 437B | 0.16126  |
| 404B -> 437B | 0.22598  |
| 404B -> 438B | 0.32379  |

406B -> 437B -0.25477  
406B -> 438B -0.19404  
407B -> 438B 0.17315  
409B -> 438B 0.10187  
410B -> 438B -0.10738  
411B -> 438B 0.14377

Excited State 154: 3.000-A 2.7554 eV 449.97 nm f=0.0000 <S\*\*2>=2.000

430A -> 440A 0.11131  
431A -> 440A -0.18579  
432A -> 439A -0.50817  
433A -> 439A 0.27180  
434A -> 439A -0.10827  
436A -> 442A -0.14246  
436A -> 446A 0.14354  
430B -> 440B -0.11132  
431B -> 440B 0.18579  
432B -> 439B 0.50817  
433B -> 439B -0.27181  
434B -> 439B 0.10828  
436B -> 442B 0.14243  
436B -> 446B -0.14353

Excited State 155: 3.000-A 2.7627 eV 448.79 nm f=0.0000 <S\*\*2>=2.000

430A -> 439A 0.13326  
431A -> 439A -0.22064  
432A -> 440A -0.54554  
433A -> 440A 0.29408  
434A -> 440A -0.14580  
430B -> 439B -0.13326  
431B -> 439B 0.22064  
432B -> 440B 0.54555  
433B -> 440B -0.29409  
434B -> 440B 0.14581

Excited State 156: 3.000-A 2.7671 eV 448.07 nm f=0.0000 <S\*\*2>=2.000

|              |          |
|--------------|----------|
| 398A -> 437A | -0.14479 |
| 400A -> 438A | 0.17995  |
| 401A -> 437A | -0.32879 |
| 403A -> 437A | 0.17906  |
| 405A -> 438A | -0.29568 |
| 406A -> 437A | -0.21446 |
| 407A -> 437A | 0.10127  |
| 408A -> 438A | 0.21684  |
| 409A -> 437A | 0.11021  |
| 411A -> 438A | 0.10276  |
| 435A -> 441A | -0.18567 |
| 398B -> 437B | 0.14692  |
| 400B -> 438B | -0.18016 |
| 401B -> 437B | 0.33022  |
| 403B -> 437B | -0.18074 |
| 405B -> 438B | 0.29574  |
| 406B -> 437B | 0.21480  |
| 407B -> 437B | -0.10215 |
| 408B -> 438B | -0.21727 |
| 409B -> 437B | -0.11019 |
| 411B -> 438B | -0.10288 |
| 435B -> 441B | 0.18587  |

Excited State 157: 1.000-A 2.7709 eV 447.46 nm f=0.0039 <S\*\*2>=0.000

|              |          |
|--------------|----------|
| 398A -> 437A | 0.44310  |
| 399A -> 438A | -0.22484 |
| 401A -> 437A | 0.22016  |
| 402A -> 438A | -0.10568 |
| 403A -> 437A | -0.32769 |
| 407A -> 437A | -0.18113 |
| 398B -> 437B | 0.44226  |
| 399B -> 438B | -0.22490 |
| 401B -> 437B | 0.21851  |
| 402B -> 438B | -0.10521 |
| 403B -> 437B | -0.32679 |
| 407B -> 437B | -0.18052 |

Excited State 158: 1.000-A 2.7728 eV 447.14 nm f=0.0203 <S\*\*2>=0.000

|              |          |
|--------------|----------|
| 398A -> 438A | -0.20938 |
| 399A -> 437A | 0.31697  |
| 400A -> 437A | -0.22978 |
| 401A -> 438A | 0.11815  |
| 402A -> 437A | -0.20322 |
| 403A -> 438A | 0.12166  |
| 404A -> 437A | -0.10870 |
| 405A -> 437A | 0.25166  |
| 406A -> 438A | 0.19155  |
| 409A -> 438A | -0.22841 |
| 410A -> 437A | -0.14968 |
| 398B -> 438B | -0.20896 |
| 399B -> 437B | 0.31695  |
| 400B -> 437B | -0.23013 |
| 401B -> 438B | 0.11884  |
| 402B -> 437B | -0.20416 |
| 403B -> 438B | 0.12124  |
| 404B -> 437B | -0.10870 |
| 405B -> 437B | 0.25201  |
| 406B -> 438B | 0.19190  |
| 409B -> 438B | -0.22859 |
| 410B -> 437B | -0.14983 |

Excited State 159: 3.000-A 2.7753 eV 446.74 nm f=0.0000 <S\*\*2>=2.000

|              |          |
|--------------|----------|
| 398A -> 438A | -0.10097 |
| 401A -> 438A | -0.11646 |
| 402A -> 437A | 0.20241  |
| 405A -> 437A | -0.10093 |
| 433A -> 441A | 0.28865  |
| 435A -> 442A | -0.49871 |
| 398B -> 438B | 0.10151  |
| 401B -> 438B | 0.11638  |
| 402B -> 437B | -0.20215 |
| 405B -> 437B | 0.10045  |

433B -> 441B -0.28869  
435B -> 442B 0.49879

Excited State 160: 1.000-A 2.7760 eV 446.64 nm f=0.0011 <S\*\*2>=0.000

430A -> 440A -0.11007  
431A -> 440A 0.21274  
432A -> 439A 0.62152  
433A -> 439A -0.19356  
434A -> 439A 0.10406  
430B -> 440B -0.11008  
431B -> 440B 0.21275  
432B -> 439B 0.62152  
433B -> 439B -0.19357  
434B -> 439B 0.10407

Excited State 161: 3.000-A 2.7774 eV 446.41 nm f=0.0000 <S\*\*2>=2.000

401A -> 437A -0.15762  
433A -> 442A -0.27551  
435A -> 441A 0.53304  
436A -> 441A 0.18991  
401B -> 437B 0.15778  
433B -> 442B 0.27552  
435B -> 441B -0.53303  
436B -> 441B -0.18997

Excited State 162: 3.000-A 2.7847 eV 445.23 nm f=0.0000 <S\*\*2>=2.000

400A -> 437A -0.16944  
401A -> 438A 0.28103  
402A -> 437A -0.38186  
403A -> 438A -0.16010  
405A -> 437A 0.17690  
406A -> 438A 0.19111  
410A -> 437A -0.10784  
433A -> 441A 0.13300  
435A -> 442A -0.23746  
400B -> 437B 0.16917

|              |          |
|--------------|----------|
| 401B -> 438B | -0.28115 |
| 402B -> 437B | 0.38199  |
| 403B -> 438B | 0.16055  |
| 405B -> 437B | -0.17661 |
| 406B -> 438B | -0.19094 |
| 410B -> 437B | 0.10767  |
| 433B -> 441B | -0.13299 |
| 435B -> 442B | 0.23736  |

Excited State 163: 1.000-A 2.7849 eV 445.20 nm f=0.0001 <S\*\*2>=0.000

|              |          |
|--------------|----------|
| 400A -> 438A | 0.11897  |
| 401A -> 437A | -0.21009 |
| 405A -> 438A | -0.22150 |
| 408A -> 438A | 0.17284  |
| 436A -> 441A | 0.21798  |
| 436A -> 443A | 0.50746  |
| 400B -> 438B | 0.11872  |
| 401B -> 437B | -0.20964 |
| 405B -> 438B | -0.22115 |
| 408B -> 438B | 0.17260  |
| 436B -> 441B | 0.21787  |
| 436B -> 443B | 0.50747  |

Excited State 164: 1.000-A 2.7850 eV 445.19 nm f=0.0000 <S\*\*2>=0.000

|              |          |
|--------------|----------|
| 430A -> 439A | -0.11700 |
| 431A -> 439A | 0.23138  |
| 432A -> 440A | 0.60922  |
| 433A -> 440A | -0.18292 |
| 434A -> 440A | 0.11849  |
| 430B -> 439B | -0.11700 |
| 431B -> 439B | 0.23137  |
| 432B -> 440B | 0.60921  |
| 433B -> 440B | -0.18292 |
| 434B -> 440B | 0.11849  |

Excited State 165: 1.000-A 2.7925 eV 443.99 nm f=0.0025 <S\*\*2>=0.000



|              |          |
|--------------|----------|
| 399A -> 438A | 0.13777  |
| 400A -> 438A | -0.14844 |
| 401A -> 437A | 0.23071  |
| 405A -> 438A | 0.29995  |
| 408A -> 438A | -0.24561 |
| 409A -> 437A | -0.13162 |
| 410A -> 438A | -0.15513 |
| 411A -> 438A | -0.12087 |
| 436A -> 441A | 0.12208  |
| 436A -> 443A | 0.38456  |
| 399B -> 438B | 0.13770  |
| 400B -> 438B | -0.14824 |
| 401B -> 437B | 0.23040  |
| 405B -> 438B | 0.29966  |
| 408B -> 438B | -0.24543 |
| 409B -> 437B | -0.13154 |
| 410B -> 438B | -0.15507 |
| 411B -> 438B | -0.12077 |
| 436B -> 441B | 0.12220  |
| 436B -> 443B | 0.38454  |

Excited State 166: 1.000-A 2.8086 eV 441.44 nm f=0.0433 <S\*\*2>=0.000

|              |          |
|--------------|----------|
| 398A -> 438A | -0.26394 |
| 401A -> 438A | -0.30434 |
| 402A -> 437A | 0.40133  |
| 403A -> 438A | 0.26021  |
| 406A -> 438A | -0.10261 |
| 407A -> 438A | -0.10560 |
| 409A -> 438A | -0.11624 |
| 436A -> 442A | -0.11972 |
| 398B -> 438B | -0.26373 |
| 401B -> 438B | -0.30394 |
| 402B -> 437B | 0.40098  |
| 403B -> 438B | 0.25996  |
| 406B -> 438B | -0.10242 |
| 407B -> 438B | -0.10561 |

409B -> 438B -0.11646  
436B -> 442B -0.11973

Excited State 167: 1.000-A 2.8105 eV 441.14 nm f=0.0182 <S\*\*2>=0.000

402A -> 437A 0.10763  
436A -> 442A 0.49064  
436A -> 444A 0.42732  
436A -> 446A -0.12486  
402B -> 437B 0.10762  
436B -> 442B 0.49065  
436B -> 444B 0.42732  
436B -> 446B -0.12486

Excited State 168: 3.000-A 2.8218 eV 439.38 nm f=0.0000 <S\*\*2>=2.000

431A -> 443A 0.14688  
432A -> 446A -0.16271  
434A -> 444A 0.23035  
434A -> 446A 0.10862  
436A -> 441A 0.34108  
436A -> 443A 0.12968  
436A -> 448A -0.34010  
436A -> 463A 0.11552  
431B -> 443B -0.14688  
432B -> 446B 0.16271  
434B -> 444B -0.23035  
434B -> 446B -0.10862  
436B -> 441B -0.34107  
436B -> 443B -0.12969  
436B -> 448B 0.34010  
436B -> 463B -0.11552

Excited State 169: 3.000-A 2.8280 eV 438.42 nm f=0.0000 <S\*\*2>=2.000

401A -> 438A 0.11953  
402A -> 437A 0.24090  
405A -> 437A -0.11173  
406A -> 438A -0.10047

408A -> 437A -0.13524  
409A -> 438A -0.52877  
410A -> 437A -0.22101  
412A -> 438A -0.13062  
401B -> 438B -0.12054  
402B -> 437B -0.24178  
405B -> 437B 0.11234  
406B -> 438B 0.10101  
408B -> 437B 0.13612  
409B -> 438B 0.53145  
410B -> 437B 0.22213  
412B -> 438B 0.13127

Excited State 170: 3.000-A 2.8319 eV 437.82 nm f=0.0000 <S\*\*2>=2.000

402A -> 438A 0.18669  
404A -> 438A -0.19624  
405A -> 438A -0.11800  
406A -> 437A -0.10703  
408A -> 438A -0.10591  
409A -> 437A -0.24659  
410A -> 438A -0.40728  
436A -> 441A 0.30890  
402B -> 438B -0.18729  
404B -> 438B 0.19699  
405B -> 438B 0.11864  
406B -> 437B 0.10743  
408B -> 438B 0.10601  
409B -> 437B 0.24727  
410B -> 438B 0.40857  
436B -> 441B -0.30924

Excited State 171: 1.000-A 2.8319 eV 437.81 nm f=0.0081 <S\*\*2>=0.000

398A -> 438A -0.15632  
401A -> 438A -0.16812  
402A -> 437A -0.18106  
403A -> 438A 0.15546

|              |          |
|--------------|----------|
| 405A -> 437A | 0.11871  |
| 406A -> 438A | 0.11158  |
| 407A -> 438A | -0.10055 |
| 408A -> 437A | 0.15926  |
| 409A -> 438A | 0.49343  |
| 410A -> 437A | 0.21029  |
| 412A -> 438A | 0.11964  |
| 398B -> 438B | -0.15587 |
| 401B -> 438B | -0.16745 |
| 402B -> 437B | -0.17975 |
| 403B -> 438B | 0.15492  |
| 405B -> 437B | 0.11808  |
| 406B -> 438B | 0.11099  |
| 407B -> 438B | -0.10034 |
| 408B -> 437B | 0.15850  |
| 409B -> 438B | 0.49057  |
| 410B -> 437B | 0.20905  |
| 412B -> 438B | 0.11893  |

Excited State 172: 1.001-A 2.8374 eV 436.97 nm f=0.0020 <S\*\*2>=0.000

|              |          |
|--------------|----------|
| 400A -> 438A | -0.10737 |
| 402A -> 438A | -0.17978 |
| 404A -> 438A | 0.21717  |
| 405A -> 438A | 0.18329  |
| 406A -> 437A | 0.12313  |
| 409A -> 437A | 0.21136  |
| 410A -> 438A | 0.38691  |
| 436A -> 441A | -0.34219 |
| 436A -> 443A | 0.16473  |
| 400B -> 438B | -0.10872 |
| 402B -> 438B | -0.18163 |
| 404B -> 438B | 0.21967  |
| 405B -> 438B | 0.18512  |
| 406B -> 437B | 0.12479  |
| 409B -> 437B | 0.21396  |
| 410B -> 438B | 0.39161  |

436B -> 441B -0.33021  
436B -> 443B 0.16096

Excited State 173: 3.000-A 2.8378 eV 436.90 nm f=0.0000 <S\*\*2>=2.000

402A -> 438A 0.10361  
404A -> 438A -0.13220  
409A -> 437A -0.14370  
410A -> 438A -0.25358  
436A -> 441A -0.47952  
436A -> 443A 0.15138  
436A -> 448A -0.17362  
404B -> 438B 0.12736  
409B -> 437B 0.13897  
410B -> 438B 0.24493  
436B -> 441B 0.48808  
436B -> 443B -0.15543  
436B -> 448B 0.17384

Excited State 174: 1.000-A 2.8416 eV 436.32 nm f=0.0010 <S\*\*2>=0.000

402A -> 438A -0.10963  
404A -> 438A 0.13487  
405A -> 438A 0.13091  
409A -> 437A 0.13479  
410A -> 438A 0.23417  
436A -> 441A 0.55077  
436A -> 443A -0.20532  
402B -> 438B -0.10930  
404B -> 438B 0.13451  
405B -> 438B 0.13061  
409B -> 437B 0.13433  
410B -> 438B 0.23342  
436B -> 441B 0.55040  
436B -> 443B -0.20519

Excited State 175: 3.000-A 2.8788 eV 430.68 nm f=0.0000 <S\*\*2>=2.000

400A -> 437A -0.19638

|              |          |
|--------------|----------|
| 402A -> 437A | 0.26505  |
| 403A -> 438A | -0.25663 |
| 406A -> 438A | 0.10555  |
| 407A -> 438A | -0.46734 |
| 408A -> 437A | 0.18759  |
| 436A -> 442A | 0.13466  |
| 400B -> 437B | 0.19939  |
| 402B -> 437B | -0.26816 |
| 403B -> 438B | 0.26076  |
| 406B -> 438B | -0.10741 |
| 407B -> 438B | 0.47232  |
| 408B -> 437B | -0.18947 |
| 436B -> 442B | -0.13479 |

Excited State 176: 1.000-A 2.8808 eV 430.39 nm f=0.0004 <S\*\*2>=0.000

|              |          |
|--------------|----------|
| 400A -> 437A | 0.25387  |
| 402A -> 437A | -0.26353 |
| 403A -> 438A | 0.34277  |
| 406A -> 438A | -0.15445 |
| 407A -> 438A | 0.41382  |
| 408A -> 437A | -0.15840 |
| 400B -> 437B | 0.25164  |
| 402B -> 437B | -0.26048 |
| 403B -> 438B | 0.33982  |
| 406B -> 438B | -0.15345 |
| 407B -> 438B | 0.40821  |
| 408B -> 437B | -0.15610 |

Excited State 177: 3.000-A 2.8841 eV 429.89 nm f=0.0000 <S\*\*2>=2.000

|              |          |
|--------------|----------|
| 402A -> 438A | -0.14822 |
| 403A -> 437A | 0.10270  |
| 404A -> 438A | 0.13666  |
| 405A -> 438A | -0.24025 |
| 406A -> 437A | 0.10606  |
| 407A -> 437A | 0.26227  |
| 408A -> 438A | -0.52968 |

402B -> 438B 0.14898  
403B -> 437B -0.10302  
404B -> 438B -0.13746  
405B -> 438B 0.24223  
406B -> 437B -0.10672  
407B -> 437B -0.26382  
408B -> 438B 0.53287

Excited State 178: 3.000-A 2.8846 eV 429.82 nm f=0.0000 <S\*\*2>=2.000

407A -> 438A 0.13936  
436A -> 442A 0.55975  
436A -> 444A -0.18254  
436A -> 446A 0.23923  
407B -> 438B -0.13897  
436B -> 442B -0.55972  
436B -> 444B 0.18250  
436B -> 446B -0.23922

Excited State 179: 1.000-A 2.8872 eV 429.43 nm f=0.0000 <S\*\*2>=0.000

402A -> 438A 0.11869  
404A -> 438A -0.13774  
405A -> 438A 0.31691  
406A -> 437A -0.11114  
407A -> 437A -0.25584  
408A -> 438A 0.51442  
402B -> 438B 0.11775  
404B -> 438B -0.13685  
405B -> 438B 0.31545  
406B -> 437B -0.11047  
407B -> 437B -0.25418  
408B -> 438B 0.51115

Excited State 180: 1.000-A 2.8890 eV 429.16 nm f=0.0068 <S\*\*2>=0.000

400A -> 437A -0.13997  
401A -> 438A -0.11538  
402A -> 437A 0.10414

|              |          |
|--------------|----------|
| 405A -> 437A | -0.16306 |
| 406A -> 438A | 0.46738  |
| 407A -> 438A | 0.31832  |
| 408A -> 437A | -0.17313 |
| 410A -> 437A | 0.10778  |
| 436A -> 442A | -0.10671 |
| 436A -> 444A | 0.12745  |
| 400B -> 437B | -0.14202 |
| 401B -> 438B | -0.11689 |
| 402B -> 437B | 0.10672  |
| 405B -> 437B | -0.16529 |
| 406B -> 438B | 0.47503  |
| 407B -> 438B | 0.32182  |
| 408B -> 437B | -0.17528 |
| 410B -> 437B | 0.10967  |
| 436B -> 442B | -0.10783 |
| 436B -> 444B | 0.12783  |

Excited State 181: 3.000-A 2.8903 eV 428.97 nm f=0.0000 <S\*\*2>=2.000

|              |          |
|--------------|----------|
| 400A -> 437A | -0.13878 |
| 401A -> 438A | -0.10378 |
| 402A -> 437A | 0.17795  |
| 405A -> 437A | -0.15494 |
| 406A -> 438A | 0.53153  |
| 407A -> 438A | 0.24841  |
| 408A -> 437A | -0.15374 |
| 410A -> 437A | 0.13205  |
| 400B -> 437B | 0.13655  |
| 401B -> 438B | 0.10218  |
| 402B -> 437B | -0.17630 |
| 405B -> 437B | 0.15257  |
| 406B -> 438B | -0.52489 |
| 407B -> 438B | -0.24415 |
| 408B -> 437B | 0.15136  |
| 410B -> 437B | -0.13050 |



Excited State 182: 1.000-A 2.8934 eV 428.51 nm f=0.0082 <S\*\*2>=0.000

406A -> 438A -0.16381

436A -> 442A -0.44055

436A -> 444A 0.49247

406B -> 438B -0.16298

436B -> 442B -0.44065

436B -> 444B 0.49250

Excited State 183: 3.000-A 2.9072 eV 426.48 nm f=0.0000 <S\*\*2>=2.000

392A -> 439A -0.34503

393A -> 440A -0.36549

394A -> 439A -0.10747

407A -> 440A 0.10462

408A -> 439A -0.10523

409A -> 440A -0.10211

410A -> 439A -0.11388

431A -> 439A -0.18489

432A -> 440A 0.18333

392B -> 439B 0.34504

393B -> 440B 0.36550

394B -> 439B 0.10745

407B -> 440B -0.10462

408B -> 439B 0.10523

409B -> 440B 0.10212

410B -> 439B 0.11388

431B -> 439B 0.18490

432B -> 440B -0.18333

Excited State 184: 3.000-A 2.9074 eV 426.44 nm f=0.0000 <S\*\*2>=2.000

392A -> 440A 0.36174

393A -> 439A 0.38983

394A -> 440A 0.11367

407A -> 439A -0.11072

408A -> 440A 0.11068

409A -> 439A 0.10821

410A -> 440A 0.11966

431A -> 440A 0.16159  
432A -> 439A -0.16616  
392B -> 440B -0.36176  
393B -> 439B -0.38983  
394B -> 440B -0.11366  
407B -> 439B 0.11072  
408B -> 440B -0.11068  
409B -> 439B -0.10821  
410B -> 440B -0.11966  
431B -> 440B -0.16159  
432B -> 439B 0.16616

Excited State 185: 3.000-A 2.9089 eV 426.23 nm f=0.0000 <S\*\*2>=2.000

400A -> 438A 0.31721  
401A -> 437A 0.16332  
402A -> 438A -0.38894  
403A -> 437A 0.25909  
405A -> 438A 0.21701  
406A -> 437A -0.16010  
410A -> 438A -0.13158  
411A -> 438A 0.13628  
400B -> 438B -0.31804  
401B -> 437B -0.16357  
402B -> 438B 0.38982  
403B -> 437B -0.25950  
405B -> 438B -0.21736  
406B -> 437B 0.16036  
410B -> 438B 0.13182  
411B -> 438B -0.13650

Excited State 186: 1.000-A 2.9187 eV 424.79 nm f=0.0001 <S\*\*2>=0.000

400A -> 438A -0.39113  
401A -> 437A -0.10636  
402A -> 438A 0.43346  
403A -> 437A -0.20525  
405A -> 438A -0.17446

|              |          |
|--------------|----------|
| 406A -> 437A | 0.14041  |
| 410A -> 438A | 0.11860  |
| 411A -> 438A | -0.11437 |
| 400B -> 438B | -0.39047 |
| 401B -> 437B | -0.10604 |
| 402B -> 438B | 0.43260  |
| 403B -> 437B | -0.20469 |
| 405B -> 438B | -0.17403 |
| 406B -> 437B | 0.14005  |
| 410B -> 438B | 0.11833  |
| 411B -> 438B | -0.11407 |

Excited State 187: 1.000-A 2.9244 eV 423.96 nm f=0.0338 <S\*\*2>=0.000

|              |          |
|--------------|----------|
| 395A -> 437A | -0.14179 |
| 396A -> 438A | -0.16315 |
| 398A -> 438A | 0.15555  |
| 400A -> 437A | 0.31500  |
| 401A -> 438A | 0.24493  |
| 402A -> 437A | 0.20126  |
| 403A -> 438A | 0.25224  |
| 404A -> 437A | 0.10754  |
| 406A -> 438A | 0.26019  |
| 407A -> 438A | -0.11425 |
| 435A -> 442A | 0.12257  |
| 395B -> 437B | -0.14162 |
| 396B -> 438B | -0.16313 |
| 398B -> 438B | 0.15579  |
| 400B -> 437B | 0.31587  |
| 401B -> 438B | 0.24580  |
| 402B -> 437B | 0.20158  |
| 403B -> 438B | 0.25303  |
| 404B -> 437B | 0.10779  |
| 406B -> 438B | 0.26073  |
| 407B -> 438B | -0.11453 |
| 435B -> 442B | 0.12254  |

Excited State 188: 3.000-A 2.9336 eV 422.63 nm f=0.0000 <S\*\*2>=2.000

|              |          |
|--------------|----------|
| 400A -> 437A | 0.35264  |
| 401A -> 438A | 0.35361  |
| 402A -> 437A | 0.15786  |
| 403A -> 438A | 0.32493  |
| 404A -> 437A | 0.10285  |
| 405A -> 437A | 0.13404  |
| 406A -> 438A | 0.22558  |
| 407A -> 438A | -0.11210 |
| 400B -> 437B | -0.35187 |
| 401B -> 438B | -0.35310 |
| 402B -> 437B | -0.15738 |
| 403B -> 438B | -0.32431 |
| 404B -> 437B | -0.10261 |
| 405B -> 437B | -0.13378 |
| 406B -> 438B | -0.22501 |
| 407B -> 438B | 0.11184  |

Excited State 189: 1.000-A 2.9389 eV 421.87 nm f=0.0000 <S\*\*2>=0.000

|              |          |
|--------------|----------|
| 430A -> 439A | 0.14241  |
| 431A -> 439A | 0.62540  |
| 432A -> 440A | -0.24465 |
| 434A -> 440A | 0.14963  |
| 430B -> 439B | 0.14272  |
| 431B -> 439B | 0.62670  |
| 432B -> 440B | -0.24510 |
| 434B -> 440B | 0.14995  |

Excited State 190: 3.000-A 2.9391 eV 421.84 nm f=0.0000 <S\*\*2>=2.000

|              |          |
|--------------|----------|
| 392A -> 439A | -0.15085 |
| 393A -> 440A | -0.16084 |
| 430A -> 439A | 0.13906  |
| 431A -> 439A | 0.57936  |
| 432A -> 440A | -0.20345 |
| 434A -> 440A | 0.14143  |
| 392B -> 439B | 0.15085  |

393B -> 440B 0.16084  
430B -> 439B -0.13874  
431B -> 439B -0.57795  
432B -> 440B 0.20290  
434B -> 440B -0.14109

Excited State 191: 3.000-A 2.9429 eV 421.30 nm f=0.0000 <S\*\*2>=2.000

400A -> 438A -0.36480  
401A -> 437A -0.20941  
402A -> 438A -0.40374  
403A -> 437A -0.21657  
404A -> 438A -0.15943  
405A -> 438A -0.10180  
406A -> 437A -0.13560  
410A -> 438A -0.13377  
411A -> 438A 0.11208  
400B -> 438B 0.36601  
401B -> 437B 0.20999  
402B -> 438B 0.40502  
403B -> 437B 0.21712  
404B -> 438B 0.15999  
405B -> 438B 0.10197  
406B -> 437B 0.13599  
410B -> 438B 0.13416  
411B -> 438B -0.11236

Excited State 192: 1.000-A 2.9467 eV 420.76 nm f=0.0002 <S\*\*2>=0.000

430A -> 440A 0.10891  
431A -> 440A 0.64010  
432A -> 439A -0.22856  
434A -> 439A 0.14664  
430B -> 440B 0.10893  
431B -> 440B 0.64025  
432B -> 439B -0.22861  
434B -> 439B 0.14667

Excited State 193: 3.000-A 2.9479 eV 420.59 nm f=0.0000 <S\*\*2>=2.000

|              |          |
|--------------|----------|
| 392A -> 440A | -0.12454 |
| 393A -> 439A | -0.13424 |
| 431A -> 440A | 0.60853  |
| 432A -> 439A | -0.21011 |
| 434A -> 439A | 0.14147  |
| 392B -> 440B | 0.12454  |
| 393B -> 439B | 0.13424  |
| 431B -> 440B | -0.60838 |
| 432B -> 439B | 0.21005  |
| 434B -> 439B | -0.14143 |

Excited State 194: 1.000-A 2.9496 eV 420.34 nm f=0.0004 <S\*\*2>=0.000

|              |         |
|--------------|---------|
| 400A -> 438A | 0.39087 |
| 401A -> 437A | 0.17179 |
| 402A -> 438A | 0.41565 |
| 403A -> 437A | 0.18590 |
| 404A -> 438A | 0.17521 |
| 406A -> 437A | 0.12705 |
| 410A -> 438A | 0.12668 |
| 400B -> 438B | 0.38976 |
| 401B -> 437B | 0.17114 |
| 402B -> 438B | 0.41443 |
| 403B -> 437B | 0.18522 |
| 404B -> 438B | 0.17473 |
| 406B -> 437B | 0.12663 |
| 410B -> 438B | 0.12628 |

Excited State 195: 1.000-A 2.9585 eV 419.08 nm f=0.0028 <S\*\*2>=0.000

|              |          |
|--------------|----------|
| 395A -> 438A | 0.26069  |
| 396A -> 437A | 0.35533  |
| 397A -> 437A | 0.28012  |
| 399A -> 438A | -0.11666 |
| 401A -> 437A | 0.20364  |
| 435A -> 441A | -0.34484 |
| 395B -> 438B | 0.26063  |

396B -> 437B 0.35532  
397B -> 437B 0.28021  
399B -> 438B -0.11674  
401B -> 437B 0.20357  
435B -> 441B -0.34485

Excited State 196: 1.000-A 2.9726 eV 417.08 nm f=0.0462 <S\*\*2>=0.000

394A -> 437A -0.11611  
395A -> 437A 0.27750  
396A -> 438A 0.23528  
397A -> 438A 0.16294  
398A -> 438A -0.12005  
399A -> 437A -0.13590  
400A -> 437A 0.11812  
401A -> 438A 0.34218  
403A -> 438A 0.12364  
435A -> 442A -0.33212  
394B -> 437B -0.11615  
395B -> 437B 0.27747  
396B -> 438B 0.23527  
397B -> 438B 0.16296  
398B -> 438B -0.12016  
399B -> 437B -0.13597  
400B -> 437B 0.11803  
401B -> 438B 0.34216  
403B -> 438B 0.12355  
435B -> 442B -0.33214

Excited State 197: 3.000-A 2.9892 eV 414.78 nm f=0.0000 <S\*\*2>=2.000

429A -> 439A -0.17177  
430A -> 439A -0.64343  
431A -> 439A 0.10916  
432A -> 440A -0.18708  
429B -> 439B 0.17181  
430B -> 439B 0.64353  
431B -> 439B -0.10917

|                                                                      |          |
|----------------------------------------------------------------------|----------|
| 432B -> 440B                                                         | 0.18711  |
| Excited State 198: 3.000-A 2.9900 eV 414.66 nm f=0.0000 <S**2>=2.000 |          |
| 431A -> 444A                                                         | -0.17466 |
| 431A -> 446A                                                         | 0.10409  |
| 434A -> 443A                                                         | -0.43189 |
| 434A -> 448A                                                         | 0.14777  |
| 436A -> 444A                                                         | -0.38764 |
| 436A -> 446A                                                         | -0.16601 |
| 431B -> 444B                                                         | 0.17466  |
| 431B -> 446B                                                         | -0.10409 |
| 434B -> 443B                                                         | 0.43188  |
| 434B -> 448B                                                         | -0.14777 |
| 436B -> 444B                                                         | 0.38764  |
| 436B -> 446B                                                         | 0.16601  |
| Excited State 199: 1.000-A 2.9972 eV 413.67 nm f=0.0000 <S**2>=0.000 |          |
| 429A -> 439A                                                         | 0.16234  |
| 430A -> 439A                                                         | 0.65766  |
| 431A -> 439A                                                         | -0.10097 |
| 432A -> 440A                                                         | 0.15303  |
| 429B -> 439B                                                         | 0.16232  |
| 430B -> 439B                                                         | 0.65755  |
| 431B -> 439B                                                         | -0.10096 |
| 432B -> 440B                                                         | 0.15301  |
| Excited State 200: 3.000-A 3.0058 eV 412.48 nm f=0.0000 <S**2>=2.000 |          |
| 429A -> 440A                                                         | -0.16232 |
| 430A -> 440A                                                         | -0.66449 |
| 432A -> 439A                                                         | -0.15000 |
| 429B -> 440B                                                         | 0.16240  |
| 430B -> 440B                                                         | 0.66478  |
| 432B -> 439B                                                         | 0.15006  |

**Table S11.** Standard orientation of the optimized geometry for the open-ring isomer (OF4) of **[Ir( $\mu$ -Cl)(PIC)<sub>2</sub>]<sub>2</sub>**.



| Symbol | Coordinates |          |          |    |          |          |          |
|--------|-------------|----------|----------|----|----------|----------|----------|
|        | X           | Y        | Z        |    |          |          |          |
| Ir     | -0.18024    | -2.14154 | -0.21421 | C  | -3.15858 | 0.71644  | 2.639935 |
| N      | -4.46048    | -2.55754 | 0.14895  | C  | -4.03974 | 0.274479 | 3.636962 |
| C      | -3.41173    | -1.94397 | -0.51338 | C  | -5.39077 | 0.648528 | 3.635821 |
| C      | -3.9597     | -1.22071 | -1.65747 | C  | -5.89273 | 1.481418 | 2.622198 |
| C      | -5.36079    | -1.44221 | -1.66196 | C  | -3.4189  | 3.737601 | -1.15262 |
| C      | -5.79125    | -2.34473 | -0.47736 | C  | -2.06144 | 3.450498 | -1.07863 |
| C      | -6.74106    | -1.60105 | 0.436099 | N  | -1.83325 | 2.494998 | -0.05882 |
| C      | -8.02737    | -1.95941 | 0.589833 | C  | -4.18596 | 4.679142 | -1.99541 |
| C      | -8.588      | -3.16357 | -0.05481 | C  | -0.87801 | 3.993222 | -1.71747 |
| C      | -7.65047    | -3.9928  | -0.83741 | C  | -0.8969  | 4.912293 | -2.78148 |
| C      | -6.36323    | -3.64517 | -1.00486 | C  | 0.297138 | 5.452446 | -3.25996 |
| O      | -9.79383    | -3.47519 | 0.072178 | C  | 1.51028  | 5.080454 | -2.66728 |
| C      | -3.3761     | -0.46763 | -2.68178 | C  | 1.530739 | 4.148548 | -1.62348 |
| C      | -4.20336    | 0.058606 | -3.68426 | C  | 0.350098 | 3.5598   | -1.14205 |
| C      | -5.58839    | -0.1589  | -3.67762 | C  | -5.06547 | 4.207908 | -2.98796 |
| C      | -6.17903    | -0.91927 | -2.65482 | C  | -5.80018 | 5.106876 | -3.76753 |
| C      | -3.96517    | -3.40561 | 1.136753 | C  | -5.66044 | 6.485595 | -3.57183 |
| C      | -2.58365    | -3.27231 | 1.05803  | C  | -4.7797  | 6.964553 | -2.59418 |
| N      | -2.25309    | -2.34826 | 0.035624 | C  | -4.04893 | 6.06877  | -1.80906 |
| C      | -4.83165    | -4.2572  | 1.979145 | Cl | -0.23367 | 0.150683 | -1.64771 |
| C      | -1.46792    | -3.96515 | 1.676591 | Cl | -0.07315 | -0.1901  | 1.645214 |
| C      | -1.59301    | -4.89171 | 2.72688  | Ir | 0.199534 | 2.054527 | 0.196971 |
| C      | -0.48035    | -5.61383 | 3.159835 | N  | 4.078316 | -2.50568 | -0.44468 |
| C      | 0.753347    | -5.42082 | 2.52689  | C  | 2.980302 | -2.11671 | 0.300106 |
| C      | 0.885903    | -4.47753 | 1.500448 | C  | 3.402731 | -1.93055 | 1.685458 |
| C      | -0.20379    | -3.69481 | 1.075824 | C  | 4.78661  | -2.22455 | 1.741956 |
| C      | -5.65377    | -3.69254 | 2.972049 | C  | 5.350333 | -2.54587 | 0.335962 |
| C      | -6.48546    | -4.50437 | 3.74991  | C  | 5.972867 | -3.92338 | 0.300919 |
| C      | -6.50106    | -5.8897  | 3.551965 | C  | 7.285289 | -4.12063 | 0.090191 |
| C      | -5.67882    | -6.46251 | 2.573772 | C  | 8.20734  | -3.00445 | -0.20033 |
| C      | -4.85159    | -5.65319 | 1.790518 | C  | 7.616381 | -1.65444 | -0.26242 |
| N      | -4.00137    | 2.946959 | -0.16512 | C  | 6.305202 | -1.43542 | -0.05818 |
| C      | -3.02761    | 2.216077 | 0.491191 | O  | 9.430346 | -3.19758 | -0.39113 |
| C      | -3.65346    | 1.545001 | 1.627767 | C  | 2.70784  | -1.64486 | 2.865197 |
| C      | -5.02099    | 1.92041  | 1.634309 | C  | 3.412547 | -1.64436 | 4.075935 |
| C      | -5.34998    | 2.87072  | 0.455139 | C  | 4.783746 | -1.92858 | 4.121661 |
| C      | -5.78684    | 4.220852 | 0.98633  | C  | 5.485258 | -2.2202  | 2.941743 |
| C      | -7.03007    | 4.700543 | 0.813554 | C  | 3.65767  | -3.00433 | -1.68133 |
| C      | -8.04385    | 3.976381 | 0.021098 | C  | 2.271775 | -2.86508 | -1.66809 |
| C      | -7.60692    | 2.724084 | -0.62709 | N  | 1.873537 | -2.28671 | -0.44094 |
| C      | -6.3655     | 2.233793 | -0.46841 | C  | 4.57849  | -3.6249  | -2.65358 |
| O      | -9.2098     | 4.41254  | -0.11029 | C  | 1.178637 | -3.30738 | -2.52212 |
|        |             |          |          | C  | 1.331228 | -3.82991 | -3.81791 |
|        |             |          |          | C  | 0.224741 | -4.32827 | -4.50899 |
|        |             |          |          | C  | -1.03565 | -4.31261 | -3.89988 |

|   |          |          |          |   |          |          |          |
|---|----------|----------|----------|---|----------|----------|----------|
| C | -1.19816 | -3.76552 | -2.62028 | H | -5.04183 | 4.760274 | 1.563791 |
| C | -0.11165 | -3.22122 | -1.91484 | H | -7.3401  | 5.649577 | 1.237064 |
| C | 5.651825 | -2.90308 | -3.20874 | H | -8.33753 | 2.231135 | -1.25935 |
| C | 6.540142 | -3.52179 | -4.094   | H | -6.04194 | 1.326758 | -0.96868 |
| C | 6.364552 | -4.8647  | -4.44635 | H | -2.12089 | 0.41288  | 2.641667 |
| C | 5.293774 | -5.58899 | -3.90773 | H | -3.65939 | -0.36483 | 4.426532 |
| C | 4.410166 | -4.97731 | -3.01495 | H | -6.0507  | 0.305942 | 4.42607  |
| N | 4.563354 | 1.764254 | 0.840705 | H | -6.93337 | 1.789856 | 2.621707 |
| C | 3.514047 | 1.671762 | -0.07168 | H | -1.83771 | 5.206048 | -3.23204 |
| C | 3.834066 | 1.430083 | -1.45388 | H | 0.281526 | 6.161074 | -4.08182 |
| C | 2.938454 | 0.777933 | -2.33135 | H | 2.442667 | 5.510233 | -3.02232 |
| C | 3.340139 | 0.362647 | -3.58919 | H | 2.479838 | 3.864618 | -1.1928  |
| C | 4.665149 | 0.586588 | -4.02625 | H | -5.16083 | 3.139772 | -3.15173 |
| C | 5.554088 | 1.264065 | -3.21046 | H | -6.47611 | 4.732127 | -4.52931 |
| C | 4.051867 | 2.234765 | 1.990602 | H | -6.23081 | 7.181602 | -4.17825 |
| C | 2.62114  | 2.383985 | 1.822468 | H | -4.66495 | 8.032671 | -2.44107 |
| N | 2.299158 | 1.953665 | 0.541675 | H | -3.36415 | 6.438371 | -1.05276 |
| C | 4.940065 | 2.517135 | 3.131332 | H | 5.297214 | -4.75038 | 0.498014 |
| C | 1.561981 | 2.951025 | 2.597745 | H | 7.722793 | -5.11289 | 0.103665 |
| C | 1.666899 | 3.391853 | 3.940089 | H | 8.299915 | -0.84143 | -0.48308 |
| C | 0.616779 | 4.078696 | 4.530635 | H | 5.879058 | -0.43625 | -0.0792  |
| C | -0.54994 | 4.349404 | 3.786322 | H | 1.652437 | -1.41957 | 2.838757 |
| C | -0.69014 | 3.872563 | 2.484024 | H | 2.879501 | -1.42341 | 4.994401 |
| C | 0.329979 | 3.114322 | 1.87092  | H | 5.30645  | -1.92764 | 5.072184 |
| C | 5.936577 | 1.584482 | 3.479209 | H | 6.544715 | -2.45365 | 2.968327 |
| C | 6.840813 | 1.85919  | 4.507153 | H | 2.30956  | -3.8518  | -4.28458 |
| C | 6.778288 | 3.076663 | 5.196405 | H | 0.346769 | -4.73134 | -5.50944 |
| C | 5.808487 | 4.021714 | 4.842845 | H | -1.89649 | -4.71788 | -4.42495 |
| C | 4.898194 | 3.747094 | 3.818223 | H | -2.18709 | -3.75203 | -2.17728 |
| H | -6.32787 | -0.72929 | 0.93335  | H | 5.78326  | -1.85876 | -2.95161 |
| H | -8.70756 | -1.39037 | 1.214485 | H | 7.366804 | -2.95471 | -4.50987 |
| H | -8.05436 | -4.90717 | -1.25803 | H | 7.055113 | -5.34258 | -5.13369 |
| H | -5.67434 | -4.26187 | -1.57455 | H | 5.151919 | -6.6312  | -4.17521 |
| H | -2.31052 | -0.28741 | -2.69191 | H | 3.585361 | -5.54124 | -2.5922  |
| H | -3.75358 | 0.636971 | -4.48439 | H | 1.940913 | 0.548621 | -1.99269 |
| H | -6.20676 | 0.246793 | -4.47154 | H | 2.635756 | -0.16383 | -4.22376 |
| H | -7.24755 | -1.10958 | -2.65113 | H | 4.976736 | 0.255418 | -5.01143 |
| H | -2.55518 | -5.05445 | 3.198656 | H | 6.542883 | 1.507743 | -3.58245 |
| H | -0.57763 | -6.32823 | 3.971163 | H | 2.563457 | 3.184048 | 4.509141 |
| H | 1.618504 | -6.00041 | 2.837295 | H | 0.695513 | 4.412941 | 5.559853 |
| H | 1.854959 | -4.35273 | 1.035008 | H | -1.35545 | 4.919681 | 4.240621 |
| H | -5.62912 | -2.62051 | 3.136676 | H | -1.60785 | 4.071426 | 1.944856 |
| H | -7.11608 | -4.05732 | 4.511643 | H | 5.989097 | 0.648363 | 2.93727  |
| H | -7.14651 | -6.51842 | 4.156668 | H | 7.598289 | 1.126365 | 4.767162 |
| H | -5.68466 | -7.5365  | 2.418609 | H | 7.485435 | 3.291727 | 5.991085 |
| H | -4.21151 | -6.09579 | 1.034374 | H | 5.770052 | 4.97922  | 5.352376 |

|   |          |          |          |   |          |          |          |
|---|----------|----------|----------|---|----------|----------|----------|
| H | 4.174606 | 4.500509 | 3.527689 | C | 6.3899   | 4.863791 | -0.15656 |
| C | 5.153828 | 1.772708 | -1.941   | H | 4.475463 | 4.09831  | -0.65162 |
| C | 6.033238 | 2.71129  | -1.27677 | H | 9.397056 | 3.302986 | -0.82841 |
| C | 7.462491 | 2.5441   | -1.35873 | H | 6.018846 | 5.789849 | 0.267493 |
| C | 5.543588 | 3.921068 | -0.66283 | C | 7.836991 | 4.681008 | -0.18006 |
| C | 8.323215 | 3.454189 | -0.81532 | O | 8.637209 | 5.538298 | 0.299855 |
| H | 7.851339 | 1.638741 | -1.81348 |   |          |          |          |

Excited State 1: 3.000-A -0.5916 eV -2095.64 nm f=-0.0000 <S\*\*2>=2.000

433A -> 438A 0.18495  
 434A -> 438A -0.26904  
 435A -> 438A 0.50711  
 436A -> 438A 0.35183  
 433B -> 438B -0.18495  
 434B -> 438B 0.26904  
 435B -> 438B -0.50711  
 436B -> 438B -0.35183

This state for optimization and/or second-order correction.

Total Energy, E(TD-HF/TD-DFT) = -6023.98914385

Copying the excited state density for this state as the 1-particle RhoCI density.

Excited State 2: 3.000-A -0.5811 eV -2133.57 nm f=-0.0000 <S\*\*2>=2.000

433A -> 437A -0.23588  
 434A -> 437A -0.23222  
 435A -> 437A -0.36290  
 436A -> 437A 0.49689  
 433B -> 437B 0.23588  
 434B -> 437B 0.23222  
 435B -> 437B 0.36290  
 436B -> 437B -0.49689

Excited State 3: 3.000-A 0.5761 eV 2152.23 nm f=0.0000 <S\*\*2>=2.000

431A -> 437A 0.15657  
 433A -> 437A 0.24932  
 434A -> 437A 0.37115  
 435A -> 437A 0.19870  
 436A -> 437A 0.47565

431B -> 437B -0.15657  
433B -> 437B -0.24932  
434B -> 437B -0.37115  
435B -> 437B -0.19870  
436B -> 437B -0.47565

Excited State 4: 1.000-A 0.6670 eV 1858.83 nm f=0.0073 <S\*\*2>=0.000

434A -> 437A 0.11164  
435A -> 437A 0.46884  
436A -> 437A 0.51653  
434B -> 437B 0.11164  
435B -> 437B 0.46884  
436B -> 437B 0.51653

Excited State 5: 3.000-A 0.6754 eV 1835.62 nm f=0.0000 <S\*\*2>=2.000

430A -> 438A 0.14579  
433A -> 438A -0.20647  
434A -> 438A 0.32327  
435A -> 438A -0.11830  
436A -> 438A 0.55845  
430B -> 438B -0.14579  
433B -> 438B 0.20647  
434B -> 438B -0.32327  
435B -> 438B 0.11830  
436B -> 438B -0.55845

Excited State 6: 1.000-A 0.7020 eV 1766.03 nm f=0.0055 <S\*\*2>=0.000

435A -> 438A -0.30309  
436A -> 438A 0.62842  
435B -> 438B -0.30309  
436B -> 438B 0.62842

Excited State 7: 3.000-A 0.7216 eV 1718.26 nm f=0.0000 <S\*\*2>=2.000

431A -> 437A -0.10962  
433A -> 437A -0.28415  
433A -> 438A 0.11327

434A -> 437A -0.21693  
435A -> 437A 0.53689  
435A -> 438A -0.16693  
436A -> 437A 0.13781  
431B -> 437B 0.10962  
433B -> 437B 0.28415  
433B -> 438B -0.11327  
434B -> 437B 0.21693  
435B -> 437B -0.53689  
435B -> 438B 0.16693  
436B -> 437B -0.13781

Excited State 8: 3.000-A 0.7380 eV 1680.11 nm f=0.0000 <S\*\*2>=2.000

430A -> 438A 0.14283  
433A -> 437A -0.11098  
433A -> 438A -0.32081  
434A -> 438A 0.28442  
435A -> 437A 0.18515  
435A -> 438A 0.43677  
436A -> 438A -0.22793  
430B -> 438B -0.14283  
433B -> 437B 0.11098  
433B -> 438B 0.32081  
434B -> 438B -0.28442  
435B -> 437B -0.18515  
435B -> 438B -0.43677  
436B -> 438B 0.22793

Excited State 9: 1.000-A 0.8232 eV 1506.11 nm f=0.0422 <S\*\*2>=0.000

433A -> 437A -0.30152  
434A -> 437A -0.22337  
435A -> 437A 0.46317  
436A -> 437A -0.38849  
433B -> 437B -0.30152  
434B -> 437B -0.22337  
435B -> 437B 0.46317

436B -> 437B -0.38849  
436A <- 437A 0.12869  
436B <- 437B 0.12869

Excited State 10: 1.000-A 0.9030 eV 1373.10 nm f=0.0912 <S\*\*2>=0.000

433A -> 438A -0.28280  
434A -> 438A 0.30879  
435A -> 438A 0.51797  
436A -> 438A 0.22676  
433B -> 438B -0.28280  
434B -> 438B 0.30879  
435B -> 438B 0.51797  
436B -> 438B 0.22676  
435A <- 438A -0.10373  
435B <- 438B -0.10373

Excited State 11: 3.000-A 0.9732 eV 1274.00 nm f=0.0000 <S\*\*2>=2.000

429A -> 437A 0.27441  
432A -> 437A 0.54354  
433A -> 437A 0.29490  
434A -> 437A -0.11639  
429B -> 437B -0.27441  
432B -> 437B -0.54354  
433B -> 437B -0.29490  
434B -> 437B 0.11639

Excited State 12: 3.000-A 1.0457 eV 1185.70 nm f=0.0000 <S\*\*2>=2.000

429A -> 438A -0.30834  
430A -> 438A 0.13960  
432A -> 438A 0.50757  
433A -> 438A 0.28427  
434A -> 438A 0.15747  
429B -> 438B 0.30834  
430B -> 438B -0.13960  
432B -> 438B -0.50757  
433B -> 438B -0.28427

434B -> 438B -0.15747

Excited State 13: 1.000-A 1.0587 eV 1171.11 nm f=0.0043 <S\*\*2>=0.000

429A -> 437A 0.10488

432A -> 437A 0.26909

433A -> 437A 0.48886

434A -> 437A -0.39238

435A -> 437A 0.12888

429B -> 437B 0.10488

432B -> 437B 0.26909

433B -> 437B 0.48886

434B -> 437B -0.39238

435B -> 437B 0.12888

Excited State 14: 3.000-A 1.0806 eV 1147.32 nm f=0.0000 <S\*\*2>=2.000

429A -> 437A 0.11459

430A -> 437A -0.12271

432A -> 437A 0.25702

433A -> 437A -0.42210

434A -> 437A 0.46264

429B -> 437B -0.11459

430B -> 437B 0.12271

432B -> 437B -0.25702

433B -> 437B 0.42210

434B -> 437B -0.46264

Excited State 15: 1.000-A 1.0893 eV 1138.16 nm f=0.0253 <S\*\*2>=0.000

429A -> 437A 0.17533

430A -> 437A -0.10012

432A -> 437A 0.45320

434A -> 437A 0.43870

435A -> 437A 0.10823

436A -> 437A -0.21193

429B -> 437B 0.17533

430B -> 437B -0.10012

432B -> 437B 0.45320

434B -> 437B 0.43870  
435B -> 437B 0.10823  
436B -> 437B -0.21193

Excited State 16: 1.000-A 1.1123 eV 1114.64 nm f=0.0020 <S\*\*2>=0.000

429A -> 438A -0.10435  
432A -> 438A 0.27714  
433A -> 438A 0.51434  
434A -> 438A 0.33783  
435A -> 438A 0.13845  
429B -> 438B -0.10435  
432B -> 438B 0.27714  
433B -> 438B 0.51434  
434B -> 438B 0.33783  
435B -> 438B 0.13845

Excited State 17: 3.000-A 1.1458 eV 1082.09 nm f=0.0000 <S\*\*2>=2.000

423A -> 437A -0.11548  
426A -> 438A -0.12219  
429A -> 438A 0.16181  
430A -> 438A -0.13038  
431A -> 438A -0.10976  
432A -> 438A -0.22017  
433A -> 438A 0.42215  
434A -> 438A 0.42059  
423B -> 437B 0.11548  
426B -> 438B 0.12219  
429B -> 438B -0.16181  
430B -> 438B 0.13038  
431B -> 438B 0.10976  
432B -> 438B 0.22017  
433B -> 438B -0.42215  
434B -> 438B -0.42059

Excited State 18: 3.000-A 1.1459 eV 1081.95 nm f=0.0000 <S\*\*2>=2.000

423A -> 437A 0.68047



423B -> 437B -0.68047

Excited State 19: 3.000-A 1.1784 eV 1052.14 nm f=0.0000 <S\*\*2>=2.000

425A -> 438A -0.23456

426A -> 438A 0.63316

425B -> 438B 0.23456

426B -> 438B -0.63316

Excited State 20: 1.000-A 1.2092 eV 1025.30 nm f=0.0355 <S\*\*2>=0.000

429A -> 438A -0.20377

431A -> 438A 0.10349

432A -> 438A 0.52170

433A -> 438A -0.16430

434A -> 438A -0.30859

435A -> 438A 0.16179

436A -> 438A 0.13319

429B -> 438B -0.20377

431B -> 438B 0.10349

432B -> 438B 0.52170

433B -> 438B -0.16430

434B -> 438B -0.30859

435B -> 438B 0.16179

436B -> 438B 0.13319

Excited State 21: 3.000-A 1.2761 eV 971.60 nm f=0.0000 <S\*\*2>=2.000

429A -> 437A 0.10717

431A -> 437A 0.64964

433A -> 437A -0.12132

434A -> 437A -0.16669

429B -> 437B -0.10717

431B -> 437B -0.64964

433B -> 437B 0.12132

434B -> 437B 0.16669

Excited State 22: 1.000-A 1.3036 eV 951.08 nm f=0.0512 <S\*\*2>=0.000

431A -> 437A 0.41978

|              |          |
|--------------|----------|
| 432A -> 437A | 0.31684  |
| 433A -> 437A | -0.33298 |
| 434A -> 437A | -0.22383 |
| 435A -> 437A | -0.15088 |
| 436A -> 437A | 0.17497  |
| 431B -> 437B | 0.41978  |
| 432B -> 437B | 0.31684  |
| 433B -> 437B | -0.33298 |
| 434B -> 437B | -0.22383 |
| 435B -> 437B | -0.15088 |
| 436B -> 437B | 0.17497  |
| 436A <- 437A | -0.10297 |
| 436B <- 437B | -0.10297 |

Excited State 23: 3.000-A 1.3213 eV 938.36 nm f=0.0000 <S\*\*2>=2.000

|              |          |
|--------------|----------|
| 427A -> 438A | -0.17581 |
| 428A -> 438A | 0.38461  |
| 429A -> 438A | -0.28217 |
| 430A -> 438A | -0.35125 |
| 431A -> 438A | 0.25681  |
| 432A -> 438A | -0.14652 |
| 427B -> 438B | 0.17581  |
| 428B -> 438B | -0.38461 |
| 429B -> 438B | 0.28217  |
| 430B -> 438B | 0.35125  |
| 431B -> 438B | -0.25681 |
| 432B -> 438B | 0.14652  |

Excited State 24: 1.000-A 1.3611 eV 910.93 nm f=0.1084 <S\*\*2>=0.000

|              |          |
|--------------|----------|
| 426A -> 438A | -0.11995 |
| 430A -> 438A | -0.20231 |
| 432A -> 438A | 0.26487  |
| 433A -> 438A | -0.32067 |
| 434A -> 438A | 0.38408  |
| 435A -> 438A | -0.30790 |
| 436A -> 438A | -0.17853 |

|              |          |
|--------------|----------|
| 426B -> 438B | -0.11995 |
| 430B -> 438B | -0.20231 |
| 432B -> 438B | 0.26487  |
| 433B -> 438B | -0.32067 |
| 434B -> 438B | 0.38408  |
| 435B -> 438B | -0.30790 |
| 436B -> 438B | -0.17853 |
| 435A <- 438A | 0.14118  |
| 435B <- 438B | 0.14118  |

Excited State 25: 3.000-A 1.3717 eV 903.84 nm f=0.0000 <S\*\*2>=2.000

|              |          |
|--------------|----------|
| 428A -> 438A | 0.23490  |
| 429A -> 438A | -0.12674 |
| 430A -> 438A | 0.51611  |
| 432A -> 438A | -0.32834 |
| 433A -> 438A | 0.15810  |
| 428B -> 438B | -0.23490 |
| 429B -> 438B | 0.12674  |
| 430B -> 438B | -0.51611 |
| 432B -> 438B | 0.32834  |
| 433B -> 438B | -0.15810 |

Excited State 26: 1.000-A 1.3791 eV 899.03 nm f=0.0161 <S\*\*2>=0.000

|              |          |
|--------------|----------|
| 428A -> 437A | 0.18383  |
| 429A -> 437A | 0.19814  |
| 430A -> 437A | -0.32874 |
| 431A -> 437A | 0.42810  |
| 432A -> 437A | -0.27921 |
| 433A -> 437A | 0.14478  |
| 436A -> 437A | -0.10017 |
| 428B -> 437B | 0.18383  |
| 429B -> 437B | 0.19814  |
| 430B -> 437B | -0.32874 |
| 431B -> 437B | 0.42810  |
| 432B -> 437B | -0.27921 |
| 433B -> 437B | 0.14478  |

436B -> 437B -0.10017

Excited State 27: 3.000-A 1.3800 eV 898.43 nm f=0.0000 <S\*\*2>=2.000

427A -> 437A -0.16750

428A -> 437A -0.32786

429A -> 437A -0.23707

430A -> 437A 0.45339

431A -> 437A 0.11903

432A -> 437A 0.26841

427B -> 437B 0.16750

428B -> 437B 0.32786

429B -> 437B 0.23707

430B -> 437B -0.45339

431B -> 437B -0.11903

432B -> 437B -0.26841

Excited State 28: 1.000-A 1.4018 eV 884.47 nm f=0.0014 <S\*\*2>=0.000

427A -> 438A -0.12130

428A -> 438A 0.38470

429A -> 438A -0.31932

430A -> 438A -0.20396

431A -> 438A 0.39989

432A -> 438A -0.15041

427B -> 438B -0.12130

428B -> 438B 0.38470

429B -> 438B -0.31932

430B -> 438B -0.20396

431B -> 438B 0.39989

432B -> 438B -0.15041

Excited State 29: 1.000-A 1.4515 eV 854.17 nm f=0.0393 <S\*\*2>=0.000

423A -> 437A -0.13324

428A -> 437A -0.15484

429A -> 437A 0.13490

430A -> 437A 0.53795

431A -> 437A 0.24308

432A -> 437A -0.15169  
 433A -> 437A 0.10049  
 434A -> 437A 0.15708  
 436A -> 437A -0.13705  
 423B -> 437B -0.13324  
 428B -> 437B -0.15484  
 429B -> 437B 0.13490  
 430B -> 437B 0.53795  
 431B -> 437B 0.24308  
 432B -> 437B -0.15169  
 433B -> 437B 0.10049  
 434B -> 437B 0.15708  
 436B -> 437B -0.13705

Excited State 30: 3.000-A 1.4523 eV 853.70 nm f=0.0000 <S\*\*2>=2.000

429A -> 437A 0.54793  
 430A -> 437A 0.35679  
 432A -> 437A -0.21099  
 429B -> 437B -0.54793  
 430B -> 437B -0.35679  
 432B -> 437B 0.21099

Excited State 31: 3.000-A 1.4736 eV 841.34 nm f=0.0000 <S\*\*2>=2.000

427A -> 437A 0.28018  
 428A -> 437A 0.49446  
 429A -> 437A -0.15369  
 430A -> 437A 0.37475  
 427B -> 437B -0.28018  
 428B -> 437B -0.49446  
 429B -> 437B 0.15369  
 430B -> 437B -0.37475

Excited State 32: 1.000-A 1.4741 eV 841.06 nm f=0.0169 <S\*\*2>=0.000

426A -> 438A -0.21077  
 429A -> 437A 0.12896  
 429A -> 438A -0.23287

430A -> 438A 0.55710  
 431A -> 438A 0.11335  
 432A -> 438A -0.10809  
 434A -> 438A 0.13248  
 426B -> 438B -0.21077  
 429B -> 437B 0.12896  
 429B -> 438B -0.23287  
 430B -> 438B 0.55710  
 431B -> 438B 0.11335  
 432B -> 438B -0.10809  
 434B -> 438B 0.13248

Excited State 33: 1.000-A 1.4797 eV 837.90 nm f=0.0171 <S\*\*2>=0.000

423A -> 437A 0.15849  
 429A -> 437A 0.59629  
 430A -> 438A -0.13379  
 431A -> 437A -0.21648  
 433A -> 437A -0.13365  
 423B -> 437B 0.15849  
 429B -> 437B 0.59629  
 430B -> 438B -0.13379  
 431B -> 437B -0.21648  
 433B -> 437B -0.13365

Excited State 34: 3.000-A 1.4989 eV 827.19 nm f=0.0000 <S\*\*2>=2.000

429A -> 438A 0.41157  
 431A -> 438A 0.54277  
 432A -> 438A 0.13452  
 429B -> 438B -0.41157  
 431B -> 438B -0.54277  
 432B -> 438B -0.13452

Excited State 35: 1.000-A 1.5074 eV 822.50 nm f=0.0001 <S\*\*2>=0.000

427A -> 437A 0.22088  
 428A -> 437A 0.52102  
 429A -> 438A -0.18350

430A -> 437A 0.22047  
431A -> 438A -0.25037  
427B -> 437B 0.22088  
428B -> 437B 0.52102  
429B -> 438B -0.18350  
430B -> 437B 0.22047  
431B -> 438B -0.25037

Excited State 36: 3.000-A 1.5084 eV 821.96 nm f=0.0000 <S\*\*2>=2.000

427A -> 438A -0.11501  
428A -> 438A 0.48506  
429A -> 438A 0.30218  
431A -> 438A -0.33216  
432A -> 438A 0.18663  
427B -> 438B 0.11501  
428B -> 438B -0.48506  
429B -> 438B -0.30218  
431B -> 438B 0.33216  
432B -> 438B -0.18663

Excited State 37: 1.000-A 1.5114 eV 820.31 nm f=0.0048 <S\*\*2>=0.000

426A -> 438A 0.11428  
427A -> 437A 0.12438  
428A -> 437A 0.27241  
428A -> 438A -0.17640  
429A -> 438A 0.31888  
430A -> 437A 0.14255  
431A -> 438A 0.47306  
426B -> 438B 0.11428  
427B -> 437B 0.12438  
428B -> 437B 0.27241  
428B -> 438B -0.17640  
429B -> 438B 0.31888  
430B -> 437B 0.14255  
431B -> 438B 0.47306

Excited State 38: 1.000-A 1.5261 eV 812.43 nm f=0.0108 <S\*\*2>=0.000

423A -> 437A 0.64907

431A -> 437A 0.10930

423B -> 437B 0.64907

431B -> 437B 0.10930

Excited State 39: 1.000-A 1.5278 eV 811.54 nm f=0.0083 <S\*\*2>=0.000

423A -> 437A 0.12357

425A -> 438A -0.13284

426A -> 438A 0.42339

427A -> 438A 0.10371

428A -> 438A -0.35522

429A -> 438A -0.33383

432A -> 438A -0.10661

423B -> 437B 0.12357

425B -> 438B -0.13284

426B -> 438B 0.42339

427B -> 438B 0.10371

428B -> 438B -0.35522

429B -> 438B -0.33383

432B -> 438B -0.10661

Excited State 40: 1.000-A 1.5541 eV 797.81 nm f=0.0169 <S\*\*2>=0.000

425A -> 438A -0.16494

426A -> 438A 0.40172

428A -> 438A 0.38976

429A -> 438A 0.17072

430A -> 438A 0.24906

431A -> 438A -0.15862

432A -> 438A 0.10291

435A -> 438A -0.10302

425B -> 438B -0.16494

426B -> 438B 0.40172

428B -> 438B 0.38976

429B -> 438B 0.17072

430B -> 438B 0.24906



431B -> 438B -0.15862  
432B -> 438B 0.10291  
435B -> 438B -0.10302

Excited State 41: 3.000-A 1.7057 eV 726.88 nm f=0.0000 <S\*\*2>=2.000

427A -> 437A 0.59391  
428A -> 437A -0.35275  
427B -> 437B -0.59391  
428B -> 437B 0.35275

Excited State 42: 1.000-A 1.7277 eV 717.65 nm f=0.0011 <S\*\*2>=0.000

427A -> 437A 0.63286  
428A -> 437A -0.28531  
427B -> 437B 0.63286  
428B -> 437B -0.28531

Excited State 43: 3.000-A 1.7857 eV 694.30 nm f=0.0000 <S\*\*2>=2.000

422A -> 438A 0.13491  
424A -> 438A -0.10605  
425A -> 438A -0.13932  
427A -> 438A 0.60205  
428A -> 438A 0.18936  
422B -> 438B -0.13491  
424B -> 438B 0.10605  
425B -> 438B 0.13932  
427B -> 438B -0.60205  
428B -> 438B -0.18936

Excited State 44: 3.000-A 1.8092 eV 685.29 nm f=0.0000 <S\*\*2>=2.000

420A -> 437A -0.10108  
421A -> 437A 0.10045  
424A -> 437A -0.44497  
425A -> 437A 0.46503  
426A -> 437A 0.17792  
420B -> 437B 0.10108  
421B -> 437B -0.10045

424B -> 437B 0.44497  
425B -> 437B -0.46503  
426B -> 437B -0.17792

Excited State 45: 1.000-A 1.8384 eV 674.41 nm f=0.0123 <S\*\*2>=0.000

427A -> 438A 0.67559  
428A -> 438A 0.17095  
427B -> 438B 0.67559  
428B -> 438B 0.17095

Excited State 46: 3.000-A 1.9016 eV 652.00 nm f=0.0000 <S\*\*2>=2.000

424A -> 438A 0.33840  
425A -> 438A 0.51077  
426A -> 438A 0.18665  
427A -> 438A 0.20570  
424B -> 438B -0.33840  
425B -> 438B -0.51077  
426B -> 438B -0.18665  
427B -> 438B -0.20570

Excited State 47: 3.000-A 1.9042 eV 651.10 nm f=0.0000 <S\*\*2>=2.000

402A -> 437A 0.18995  
403A -> 437A 0.15970  
404A -> 437A 0.11685  
409A -> 437A 0.11868  
413A -> 437A -0.17144  
416A -> 437A 0.19348  
417A -> 437A 0.19098  
418A -> 437A -0.15977  
419A -> 437A -0.10759  
420A -> 437A 0.28552  
421A -> 437A -0.18508  
422A -> 437A 0.14916  
425A -> 437A 0.15204  
402B -> 437B -0.18995  
403B -> 437B -0.15970

404B -> 437B -0.11685  
409B -> 437B -0.11868  
413B -> 437B 0.17144  
416B -> 437B -0.19348  
417B -> 437B -0.19098  
418B -> 437B 0.15977  
419B -> 437B 0.10759  
420B -> 437B -0.28552  
421B -> 437B 0.18508  
422B -> 437B -0.14916  
425B -> 437B -0.15204

Excited State 48: 3.000-A 1.9240 eV 644.41 nm f=0.0000 <S\*\*2>=2.000

399A -> 438A -0.11776  
404A -> 438A -0.10992  
405A -> 438A 0.11120  
406A -> 438A -0.10484  
410A -> 438A -0.16631  
416A -> 438A -0.12635  
417A -> 438A 0.10313  
418A -> 438A -0.13983  
419A -> 438A 0.19982  
420A -> 438A 0.23182  
421A -> 438A 0.35060  
422A -> 438A -0.17566  
425A -> 438A -0.14132  
427A -> 438A 0.15617  
399B -> 438B 0.11776  
404B -> 438B 0.10992  
405B -> 438B -0.11120  
406B -> 438B 0.10484  
410B -> 438B 0.16631  
416B -> 438B 0.12635  
417B -> 438B -0.10313  
418B -> 438B 0.13983  
419B -> 438B -0.19982

420B -> 438B -0.23182  
421B -> 438B -0.35060  
422B -> 438B 0.17566  
425B -> 438B 0.14132  
427B -> 438B -0.15617

Excited State 49: 1.000-A 1.9345 eV 640.91 nm f=0.0157 <S\*\*2>=0.000

424A -> 437A -0.44096  
425A -> 437A 0.50374  
426A -> 437A 0.19811  
424B -> 437B -0.44096  
425B -> 437B 0.50374  
426B -> 437B 0.19811

Excited State 50: 1.000-A 1.9893 eV 623.25 nm f=0.0095 <S\*\*2>=0.000

424A -> 438A 0.38671  
425A -> 438A 0.53956  
426A -> 438A 0.19845  
424B -> 438B 0.38671  
425B -> 438B 0.53956  
426B -> 438B 0.19845

Excited State 51: 3.000-A 2.0284 eV 611.23 nm f=0.0000 <S\*\*2>=2.000

422A -> 437A 0.22920  
424A -> 437A 0.50590  
425A -> 437A 0.37108  
426A -> 437A 0.15042  
422B -> 437B -0.22920  
424B -> 437B -0.50590  
425B -> 437B -0.37108  
426B -> 437B -0.15042

Excited State 52: 1.000-A 2.0376 eV 608.47 nm f=0.0006 <S\*\*2>=0.000

422A -> 437A 0.22100  
424A -> 437A 0.51962  
425A -> 437A 0.37314

426A -> 437A 0.15250  
422B -> 437B 0.22100  
424B -> 437B 0.51962  
425B -> 437B 0.37314  
426B -> 437B 0.15250

Excited State 53: 3.000-A 2.0479 eV 605.41 nm f=0.0000 <S\*\*2>=2.000

409A -> 438A 0.13220  
410A -> 438A 0.14324  
411A -> 438A 0.22704  
413A -> 438A -0.13772  
415A -> 438A 0.12178  
416A -> 438A -0.11976  
419A -> 438A -0.13385  
421A -> 438A 0.16320  
422A -> 438A 0.30236  
424A -> 438A 0.36337  
425A -> 438A -0.12613  
409B -> 438B -0.13220  
410B -> 438B -0.14324  
411B -> 438B -0.22704  
413B -> 438B 0.13772  
415B -> 438B -0.12178  
416B -> 438B 0.11976  
419B -> 438B 0.13385  
421B -> 438B -0.16320  
422B -> 438B -0.30236  
424B -> 438B -0.36337  
425B -> 438B 0.12613

Excited State 54: 3.000-A 2.0973 eV 591.16 nm f=0.0000 <S\*\*2>=2.000

408A -> 438A -0.10015  
410A -> 438A -0.20505  
411A -> 438A -0.11756  
413A -> 438A 0.10787  
414A -> 438A 0.11315

|              |          |
|--------------|----------|
| 415A -> 438A | -0.15530 |
| 416A -> 438A | 0.11622  |
| 418A -> 438A | -0.12442 |
| 419A -> 438A | 0.16073  |
| 420A -> 438A | -0.20664 |
| 421A -> 438A | -0.12839 |
| 422A -> 438A | 0.13455  |
| 424A -> 438A | 0.38642  |
| 425A -> 438A | -0.20507 |
| 408B -> 438B | 0.10015  |
| 410B -> 438B | 0.20505  |
| 411B -> 438B | 0.11756  |
| 413B -> 438B | -0.10787 |
| 414B -> 438B | -0.11315 |
| 415B -> 438B | 0.15530  |
| 416B -> 438B | -0.11622 |
| 418B -> 438B | 0.12442  |
| 419B -> 438B | -0.16073 |
| 420B -> 438B | 0.20664  |
| 421B -> 438B | 0.12839  |
| 422B -> 438B | -0.13455 |
| 424B -> 438B | -0.38642 |
| 425B -> 438B | 0.20507  |

Excited State 55: 1.000-A 2.1004 eV 590.28 nm f=0.0015 <S\*\*2>=0.000

|              |          |
|--------------|----------|
| 422A -> 438A | 0.27202  |
| 424A -> 438A | 0.52982  |
| 425A -> 438A | -0.33808 |
| 426A -> 438A | -0.11900 |
| 422B -> 438B | 0.27202  |
| 424B -> 438B | 0.52982  |
| 425B -> 438B | -0.33808 |
| 426B -> 438B | -0.11900 |

Excited State 56: 3.000-A 2.1066 eV 588.54 nm f=0.0000 <S\*\*2>=2.000

|              |         |
|--------------|---------|
| 400A -> 437A | 0.14312 |
|--------------|---------|

|              |          |
|--------------|----------|
| 402A -> 437A | 0.15079  |
| 403A -> 437A | -0.22036 |
| 404A -> 437A | 0.11141  |
| 407A -> 437A | -0.15788 |
| 409A -> 437A | -0.14678 |
| 413A -> 437A | 0.24021  |
| 414A -> 437A | -0.13422 |
| 415A -> 437A | 0.15230  |
| 416A -> 437A | -0.20940 |
| 417A -> 437A | -0.15420 |
| 418A -> 437A | -0.19832 |
| 420A -> 437A | 0.10526  |
| 421A -> 437A | -0.13258 |
| 422A -> 437A | 0.22264  |
| 424A -> 437A | -0.11616 |
| 400B -> 437B | -0.14312 |
| 402B -> 437B | -0.15079 |
| 403B -> 437B | 0.22036  |
| 404B -> 437B | -0.11141 |
| 407B -> 437B | 0.15788  |
| 409B -> 437B | 0.14678  |
| 413B -> 437B | -0.24021 |
| 414B -> 437B | 0.13422  |
| 415B -> 437B | -0.15230 |
| 416B -> 437B | 0.20940  |
| 417B -> 437B | 0.15420  |
| 418B -> 437B | 0.19832  |
| 420B -> 437B | -0.10526 |
| 421B -> 437B | 0.13258  |
| 422B -> 437B | -0.22264 |
| 424B -> 437B | 0.11616  |

Excited State 57: 3.000-A 2.1647 eV 572.75 nm f=0.0000 <S\*\*2>=2.000

|              |          |
|--------------|----------|
| 422A -> 437A | -0.19334 |
| 425A -> 437A | -0.17852 |
| 426A -> 437A | 0.63921  |

422B -> 437B 0.19334  
425B -> 437B 0.17852  
426B -> 437B -0.63921

Excited State 58: 1.000-A 2.1655 eV 572.54 nm f=0.0001 <S\*\*2>=0.000

422A -> 437A -0.11764  
425A -> 437A -0.23435  
426A -> 437A 0.65256  
422B -> 437B -0.11764  
425B -> 437B -0.23435  
426B -> 437B 0.65256

Excited State 59: 3.000-A 2.1731 eV 570.54 nm f=0.0000 <S\*\*2>=2.000

411A -> 438A -0.16303  
413A -> 438A 0.17153  
415A -> 438A -0.15862  
416A -> 438A 0.14787  
419A -> 438A -0.29504  
421A -> 438A 0.30035  
422A -> 438A -0.27609  
424A -> 438A 0.16456  
425A -> 438A -0.16417  
411B -> 438B 0.16303  
413B -> 438B -0.17153  
415B -> 438B 0.15862  
416B -> 438B -0.14787  
419B -> 438B 0.29504  
421B -> 438B -0.30035  
422B -> 438B 0.27609  
424B -> 438B -0.16456  
425B -> 438B 0.16417

Excited State 60: 3.000-A 2.1751 eV 570.01 nm f=0.0000 <S\*\*2>=2.000

400A -> 437A -0.10195  
402A -> 437A -0.16221  
403A -> 437A 0.11497



|              |          |
|--------------|----------|
| 404A -> 437A | -0.12024 |
| 407A -> 437A | 0.14808  |
| 412A -> 437A | 0.13304  |
| 417A -> 437A | 0.12047  |
| 422A -> 437A | 0.49429  |
| 425A -> 437A | -0.22926 |
| 426A -> 437A | 0.17066  |
| 400B -> 437B | 0.10195  |
| 402B -> 437B | 0.16221  |
| 403B -> 437B | -0.11497 |
| 404B -> 437B | 0.12024  |
| 407B -> 437B | -0.14808 |
| 412B -> 437B | -0.13304 |
| 417B -> 437B | -0.12047 |
| 422B -> 437B | -0.49429 |
| 425B -> 437B | 0.22926  |
| 426B -> 437B | -0.17066 |

Excited State 61: 1.000-A 2.1880 eV 566.64 nm f=0.0025 <S\*\*2>=0.000

|              |          |
|--------------|----------|
| 420A -> 437A | 0.18563  |
| 422A -> 437A | 0.62184  |
| 424A -> 437A | -0.14787 |
| 425A -> 437A | -0.16653 |
| 420B -> 437B | 0.18563  |
| 422B -> 437B | 0.62184  |
| 424B -> 437B | -0.14787 |
| 425B -> 437B | -0.16653 |

Excited State 62: 3.000-A 2.1885 eV 566.53 nm f=0.0000 <S\*\*2>=2.000

|              |          |
|--------------|----------|
| 433A -> 439A | 0.12064  |
| 436A -> 439A | 0.68505  |
| 433B -> 439B | -0.12064 |
| 436B -> 439B | -0.68505 |

Excited State 63: 1.000-A 2.1937 eV 565.18 nm f=0.0002 <S\*\*2>=0.000

|              |         |
|--------------|---------|
| 433A -> 439A | 0.11442 |
|--------------|---------|

436A -> 439A 0.69037  
433B -> 439B 0.11442  
436B -> 439B 0.69037

Excited State 64: 3.000-A 2.2120 eV 560.50 nm f=0.0000 <S\*\*2>=2.000

400A -> 437A 0.10031  
401A -> 437A 0.10381  
402A -> 437A 0.20805  
404A -> 437A 0.14066  
412A -> 437A -0.15089  
413A -> 437A -0.12756  
417A -> 437A -0.17736  
420A -> 437A -0.24063  
421A -> 437A 0.38045  
422A -> 437A 0.20846  
425A -> 437A -0.14065  
400B -> 437B -0.10031  
401B -> 437B -0.10381  
402B -> 437B -0.20805  
404B -> 437B -0.14066  
412B -> 437B 0.15089  
413B -> 437B 0.12756  
417B -> 437B 0.17736  
420B -> 437B 0.24063  
421B -> 437B -0.38045  
422B -> 437B -0.20846  
425B -> 437B 0.14065

Excited State 65: 1.000-A 2.2159 eV 559.53 nm f=0.0244 <S\*\*2>=0.000

420A -> 438A -0.14579  
421A -> 438A -0.25797  
422A -> 438A 0.58338  
424A -> 438A -0.18819  
425A -> 438A 0.11740  
420B -> 438B -0.14579  
421B -> 438B -0.25797

422B -> 438B 0.58338  
424B -> 438B -0.18819  
425B -> 438B 0.11740

Excited State 66: 3.000-A 2.2177 eV 559.06 nm f=0.0000 <S\*\*2>=2.000

435A -> 440A -0.18375  
436A -> 440A 0.67574  
435B -> 440B 0.18375  
436B -> 440B -0.67574

Excited State 67: 1.000-A 2.2184 eV 558.88 nm f=0.0001 <S\*\*2>=0.000

435A -> 440A -0.19318  
436A -> 440A 0.67404  
435B -> 440B -0.19318  
436B -> 440B 0.67404

Excited State 68: 3.000-A 2.2337 eV 555.07 nm f=0.0000 <S\*\*2>=2.000

397A -> 438A 0.11989  
399A -> 438A 0.16957  
409A -> 438A -0.12004  
411A -> 438A -0.25300  
417A -> 438A -0.10679  
418A -> 438A 0.23230  
419A -> 438A 0.17743  
420A -> 438A 0.31835  
421A -> 438A 0.11556  
422A -> 438A 0.31126  
397B -> 438B -0.11989  
399B -> 438B -0.16957  
409B -> 438B 0.12004  
411B -> 438B 0.25300  
417B -> 438B 0.10679  
418B -> 438B -0.23230  
419B -> 438B -0.17743  
420B -> 438B -0.31835  
421B -> 438B -0.11556

422B -> 438B -0.31126

Excited State 69: 1.000-A 2.2469 eV 551.81 nm f=0.0246 <S\*\*2>=0.000

418A -> 437A 0.20335

419A -> 437A 0.15531

420A -> 437A -0.39822

421A -> 437A 0.47604

422A -> 437A 0.14931

418B -> 437B 0.20335

419B -> 437B 0.15531

420B -> 437B -0.39822

421B -> 437B 0.47604

422B -> 437B 0.14931

Excited State 70: 3.000-A 2.2522 eV 550.51 nm f=0.0000 <S\*\*2>=2.000

410A -> 438A -0.11330

413A -> 438A 0.10964

415A -> 438A -0.16495

416A -> 438A 0.11661

418A -> 438A -0.14828

419A -> 438A -0.12586

420A -> 438A -0.12477

421A -> 438A 0.34378

422A -> 438A 0.36483

424A -> 438A -0.22124

425A -> 438A 0.19047

410B -> 438B 0.11330

413B -> 438B -0.10964

415B -> 438B 0.16495

416B -> 438B -0.11661

418B -> 438B 0.14828

419B -> 438B 0.12586

420B -> 438B 0.12477

421B -> 438B -0.34378

422B -> 438B -0.36483

424B -> 438B 0.22124

425B -> 438B -0.19047

Excited State 71: 1.000-A 2.2610 eV 548.37 nm f=0.0191 <S\*\*2>=0.000

418A -> 438A 0.10122

419A -> 438A -0.29385

420A -> 438A 0.18674

421A -> 438A 0.50670

422A -> 438A 0.22671

424A -> 438A -0.13741

418B -> 438B 0.10122

419B -> 438B -0.29385

420B -> 438B 0.18674

421B -> 438B 0.50670

422B -> 438B 0.22671

424B -> 438B -0.13741

Excited State 72: 3.000-A 2.2648 eV 547.44 nm f=0.0000 <S\*\*2>=2.000

434A -> 440A -0.17944

435A -> 440A -0.64785

436A -> 440A -0.17436

434B -> 440B 0.17944

435B -> 440B 0.64785

436B -> 440B 0.17436

Excited State 73: 3.000-A 2.2724 eV 545.60 nm f=0.0000 <S\*\*2>=2.000

434A -> 439A 0.14074

435A -> 439A -0.68761

434B -> 439B -0.14074

435B -> 439B 0.68761

Excited State 74: 1.000-A 2.2736 eV 545.32 nm f=0.0003 <S\*\*2>=0.000

434A -> 440A 0.16829

435A -> 440A 0.65233

436A -> 440A 0.18564

434B -> 440B 0.16829

435B -> 440B 0.65233

436B -> 440B 0.18564

Excited State 75: 1.000-A 2.2757 eV 544.81 nm f=0.0002 <S\*\*2>=0.000

434A -> 439A -0.13748

435A -> 439A 0.68898

434B -> 439B -0.13748

435B -> 439B 0.68898

Excited State 76: 3.000-A 2.2851 eV 542.59 nm f=0.0000 <S\*\*2>=2.000

395A -> 437A 0.17004

403A -> 437A 0.35548

407A -> 437A 0.21395

409A -> 437A 0.10082

412A -> 437A 0.14069

416A -> 437A -0.12871

417A -> 437A -0.30723

418A -> 437A -0.29568

395B -> 437B -0.17004

403B -> 437B -0.35548

407B -> 437B -0.21395

409B -> 437B -0.10082

412B -> 437B -0.14069

416B -> 437B 0.12871

417B -> 437B 0.30723

418B -> 437B 0.29568

Excited State 77: 3.000-A 2.3165 eV 535.22 nm f=0.0000 <S\*\*2>=2.000

395A -> 437A -0.10356

401A -> 437A 0.14667

402A -> 437A 0.16004

403A -> 437A 0.16177

412A -> 437A 0.17663

413A -> 437A 0.14417

414A -> 437A -0.10668

415A -> 437A 0.20133

416A -> 437A -0.10145

|              |          |
|--------------|----------|
| 417A -> 437A | 0.33894  |
| 418A -> 437A | 0.23094  |
| 420A -> 437A | -0.23007 |
| 395B -> 437B | 0.10356  |
| 401B -> 437B | -0.14667 |
| 402B -> 437B | -0.16004 |
| 403B -> 437B | -0.16177 |
| 412B -> 437B | -0.17663 |
| 413B -> 437B | -0.14417 |
| 414B -> 437B | 0.10668  |
| 415B -> 437B | -0.20133 |
| 416B -> 437B | 0.10145  |
| 417B -> 437B | -0.33894 |
| 418B -> 437B | -0.23094 |
| 420B -> 437B | 0.23007  |

Excited State 78: 1.000-A 2.3258 eV 533.08 nm f=0.0057 <S\*\*2>=0.000

|              |          |
|--------------|----------|
| 412A -> 437A | 0.10032  |
| 417A -> 437A | 0.46305  |
| 418A -> 437A | 0.44800  |
| 421A -> 437A | -0.19844 |
| 412B -> 437B | 0.10032  |
| 417B -> 437B | 0.46305  |
| 418B -> 437B | 0.44800  |
| 421B -> 437B | -0.19844 |

Excited State 79: 1.000-A 2.3287 eV 532.42 nm f=0.0067 <S\*\*2>=0.000

|              |          |
|--------------|----------|
| 411A -> 438A | -0.10949 |
| 418A -> 438A | -0.10902 |
| 419A -> 438A | 0.54410  |
| 420A -> 438A | 0.22488  |
| 421A -> 438A | 0.23420  |
| 422A -> 438A | 0.13121  |
| 411B -> 438B | -0.10949 |
| 418B -> 438B | -0.10902 |
| 419B -> 438B | 0.54410  |

420B -> 438B 0.22488  
421B -> 438B 0.23420  
422B -> 438B 0.13121

Excited State 80: 1.000-A 2.3499 eV 527.61 nm f=0.0001 <S\*\*2>=0.000

423A -> 438A 0.70013  
423B -> 438B 0.70013

Excited State 81: 3.000-A 2.3500 eV 527.60 nm f=0.0000 <S\*\*2>=2.000

423A -> 438A -0.70308  
423B -> 438B 0.70308

Excited State 82: 3.000-A 2.3564 eV 526.16 nm f=0.0000 <S\*\*2>=2.000

397A -> 438A -0.17840  
404A -> 438A 0.12069  
405A -> 438A -0.10636  
406A -> 438A 0.13646  
408A -> 438A 0.10755  
410A -> 438A 0.23834  
413A -> 438A 0.11991  
414A -> 438A -0.17088  
415A -> 438A -0.15487  
416A -> 438A 0.15073  
418A -> 438A -0.15258  
419A -> 438A 0.44968  
397B -> 438B 0.17840  
404B -> 438B -0.12069  
405B -> 438B 0.10636  
406B -> 438B -0.13646  
408B -> 438B -0.10755  
410B -> 438B -0.23834  
413B -> 438B -0.11991  
414B -> 438B 0.17088  
415B -> 438B 0.15487  
416B -> 438B -0.15073  
418B -> 438B 0.15258



419B -> 438B -0.44968

Excited State 83: 3.000-A 2.3777 eV 521.44 nm f=0.0000 <S\*\*2>=2.000

395A -> 437A -0.13453

417A -> 437A -0.36378

418A -> 437A 0.40308

419A -> 437A 0.18012

420A -> 437A 0.24014

421A -> 437A -0.19699

395B -> 437B 0.13453

417B -> 437B 0.36378

418B -> 437B -0.40308

419B -> 437B -0.18012

420B -> 437B -0.24014

421B -> 437B 0.19699

Excited State 84: 1.000-A 2.3953 eV 517.61 nm f=0.0198 <S\*\*2>=0.000

415A -> 438A 0.14291

417A -> 438A -0.12465

418A -> 438A 0.36090

420A -> 438A 0.48168

421A -> 438A -0.24308

415B -> 438B 0.14291

417B -> 438B -0.12465

418B -> 438B 0.36090

420B -> 438B 0.48168

421B -> 438B -0.24308

Excited State 85: 1.000-A 2.4038 eV 515.78 nm f=0.0117 <S\*\*2>=0.000

417A -> 437A 0.43460

418A -> 437A -0.38620

419A -> 437A -0.19963

420A -> 437A -0.30275

417B -> 437B 0.43460

418B -> 437B -0.38620

419B -> 437B -0.19963

420B -> 437B -0.30275

Excited State 86: 3.000-A 2.4439 eV 507.32 nm f=0.0000 <S\*\*2>=2.000

396A -> 438A -0.12830

397A -> 438A 0.44266

399A -> 438A 0.19994

402A -> 438A -0.13032

418A -> 438A -0.17463

419A -> 438A 0.15235

420A -> 438A -0.28362

396B -> 438B 0.12830

397B -> 438B -0.44266

399B -> 438B -0.19994

402B -> 438B 0.13032

418B -> 438B 0.17463

419B -> 438B -0.15235

420B -> 438B 0.28362

Excited State 87: 1.000-A 2.4457 eV 506.95 nm f=0.0149 <S\*\*2>=0.000

415A -> 437A -0.20290

416A -> 437A 0.21001

417A -> 437A 0.23078

420A -> 437A 0.37042

421A -> 437A 0.40688

415B -> 437B -0.20290

416B -> 437B 0.21001

417B -> 437B 0.23078

420B -> 437B 0.37042

421B -> 437B 0.40688

Excited State 88: 3.000-A 2.4575 eV 504.51 nm f=0.0000 <S\*\*2>=2.000

395A -> 437A 0.45673

415A -> 437A 0.29328

416A -> 437A 0.21292

418A -> 437A 0.12972

420A -> 437A -0.12518

421A -> 437A -0.19680  
395B -> 437B -0.45673  
415B -> 437B -0.29328  
416B -> 437B -0.21292  
418B -> 437B -0.12972  
420B -> 437B 0.12518  
421B -> 437B 0.19680

Excited State 89: 3.000-A 2.4622 eV 503.55 nm f=0.0000 <S\*\*2>=2.000

395A -> 437A 0.12820  
400A -> 437A 0.11607  
412A -> 437A 0.10181  
413A -> 437A 0.22284  
416A -> 437A 0.12406  
418A -> 437A 0.10738  
420A -> 437A 0.40580  
421A -> 437A 0.39629  
422A -> 437A -0.12063  
395B -> 437B -0.12820  
400B -> 437B -0.11607  
412B -> 437B -0.10181  
413B -> 437B -0.22284  
416B -> 437B -0.12406  
418B -> 437B -0.10738  
420B -> 437B -0.40580  
421B -> 437B -0.39629  
422B -> 437B 0.12063

Excited State 90: 1.000-A 2.4693 eV 502.10 nm f=0.0113 <S\*\*2>=0.000

402A -> 438A -0.13792  
404A -> 438A 0.13778  
405A -> 438A -0.14385  
406A -> 438A 0.15190  
408A -> 438A 0.17025  
409A -> 438A 0.15582  
410A -> 438A 0.33183

411A -> 438A 0.19128  
414A -> 438A -0.25509  
417A -> 438A 0.10062  
418A -> 438A -0.13739  
419A -> 438A 0.24068  
402B -> 438B -0.13792  
404B -> 438B 0.13778  
405B -> 438B -0.14385  
406B -> 438B 0.15190  
408B -> 438B 0.17025  
409B -> 438B 0.15582  
410B -> 438B 0.33183  
411B -> 438B 0.19128  
414B -> 438B -0.25509  
417B -> 438B 0.10062  
418B -> 438B -0.13739  
419B -> 438B 0.24068

Excited State 91: 3.000-A 2.4833 eV 499.28 nm f=0.0000 <S\*\*2>=2.000

410A -> 439A -0.14269  
413A -> 439A -0.19670  
414A -> 439A -0.61683  
415A -> 439A -0.11773  
416A -> 439A 0.12443  
410B -> 439B 0.14269  
413B -> 439B 0.19670  
414B -> 439B 0.61683  
415B -> 439B 0.11773  
416B -> 439B -0.12443

Excited State 92: 3.000-A 2.4866 eV 498.61 nm f=0.0000 <S\*\*2>=2.000

395A -> 437A -0.12163  
415A -> 440A 0.46447  
416A -> 440A 0.44427  
417A -> 440A -0.11013  
418A -> 440A -0.13216

395B -> 437B 0.12163  
415B -> 440B -0.46447  
416B -> 440B -0.44427  
417B -> 440B 0.11013  
418B -> 440B 0.13216

Excited State 93: 1.000-A 2.5092 eV 494.12 nm f=0.0008 <S\*\*2>=0.000

400A -> 437A 0.15422  
402A -> 437A 0.21564  
403A -> 437A -0.10010  
404A -> 437A 0.16963  
407A -> 437A -0.16748  
412A -> 437A -0.15067  
413A -> 437A 0.12149  
415A -> 437A 0.37314  
416A -> 437A 0.36426  
400B -> 437B 0.15422  
402B -> 437B 0.21564  
403B -> 437B -0.10010  
404B -> 437B 0.16963  
407B -> 437B -0.16748  
412B -> 437B -0.15067  
413B -> 437B 0.12149  
415B -> 437B 0.37314  
416B -> 437B 0.36426

Excited State 94: 3.000-A 2.5296 eV 490.14 nm f=0.0000 <S\*\*2>=2.000

397A -> 438A 0.30435  
402A -> 438A -0.15046  
405A -> 438A -0.10059  
406A -> 438A 0.12136  
409A -> 438A 0.12136  
410A -> 438A -0.17929  
411A -> 438A 0.15497  
413A -> 438A 0.15257  
420A -> 438A 0.35852

|              |          |
|--------------|----------|
| 421A -> 438A | -0.21252 |
| 397B -> 438B | -0.30435 |
| 402B -> 438B | 0.15046  |
| 405B -> 438B | 0.10059  |
| 406B -> 438B | -0.12136 |
| 409B -> 438B | -0.12136 |
| 410B -> 438B | 0.17929  |
| 411B -> 438B | -0.15497 |
| 413B -> 438B | -0.15257 |
| 420B -> 438B | -0.35852 |
| 421B -> 438B | 0.21252  |

Excited State 95: 1.000-A 2.5331 eV 489.45 nm f=0.0263 <S\*\*2>=0.000

|              |          |
|--------------|----------|
| 403A -> 437A | 0.10535  |
| 412A -> 437A | 0.14547  |
| 413A -> 437A | 0.35779  |
| 414A -> 437A | -0.22532 |
| 415A -> 437A | 0.21691  |
| 416A -> 437A | -0.33108 |
| 420A -> 437A | 0.21063  |
| 421A -> 437A | 0.19302  |
| 403B -> 437B | 0.10535  |
| 412B -> 437B | 0.14547  |
| 413B -> 437B | 0.35779  |
| 414B -> 437B | -0.22532 |
| 415B -> 437B | 0.21691  |
| 416B -> 437B | -0.33108 |
| 420B -> 437B | 0.21063  |
| 421B -> 437B | 0.19302  |

Excited State 96: 1.000-A 2.5513 eV 485.96 nm f=0.0147 <S\*\*2>=0.000

|              |          |
|--------------|----------|
| 410A -> 438A | 0.18764  |
| 415A -> 438A | -0.30144 |
| 416A -> 438A | 0.33159  |
| 417A -> 438A | -0.26127 |
| 418A -> 438A | 0.30289  |

420A -> 438A -0.16960  
410B -> 438B 0.18764  
415B -> 438B -0.30144  
416B -> 438B 0.33159  
417B -> 438B -0.26127  
418B -> 438B 0.30289  
420B -> 438B -0.16960

Excited State 97: 3.000-A 2.5677 eV 482.86 nm f=0.0000 <S\*\*2>=2.000

400A -> 438A 0.14108  
411A -> 438A 0.30187  
415A -> 438A -0.16592  
416A -> 438A 0.19763  
417A -> 438A -0.25980  
418A -> 438A 0.38410  
419A -> 438A 0.14336  
420A -> 438A -0.11192  
421A -> 438A 0.10454  
400B -> 438B -0.14108  
411B -> 438B -0.30187  
415B -> 438B 0.16592  
416B -> 438B -0.19763  
417B -> 438B 0.25980  
418B -> 438B -0.38410  
419B -> 438B -0.14336  
420B -> 438B 0.11192  
421B -> 438B -0.10454

Excited State 98: 3.000-A 2.5769 eV 481.13 nm f=0.0000 <S\*\*2>=2.000

411A -> 437A 0.28335  
412A -> 437A -0.13938  
413A -> 437A 0.33925  
415A -> 437A -0.27933  
416A -> 437A 0.18768  
418A -> 437A 0.15242  
419A -> 437A -0.28132

411B -> 437B -0.28335  
412B -> 437B 0.13938  
413B -> 437B -0.33925  
415B -> 437B 0.27933  
416B -> 437B -0.18768  
418B -> 437B -0.15242  
419B -> 437B 0.28132

Excited State 99: 1.000-A 2.5834 eV 479.93 nm f=0.0045 <S\*\*2>=0.000

411A -> 437A -0.23192  
412A -> 437A 0.24172  
413A -> 437A -0.28074  
415A -> 437A 0.37819  
418A -> 437A -0.19786  
419A -> 437A 0.24640  
411B -> 437B -0.23192  
412B -> 437B 0.24172  
413B -> 437B -0.28074  
415B -> 437B 0.37819  
418B -> 437B -0.19786  
419B -> 437B 0.24640

Excited State 100: 3.000-A 2.5853 eV 479.57 nm f=0.0000 <S\*\*2>=2.000

395A -> 437A -0.26357  
412A -> 437A 0.15814  
415A -> 437A 0.32382  
416A -> 437A 0.43219  
417A -> 437A -0.11007  
419A -> 437A -0.12507  
395B -> 437B 0.26357  
412B -> 437B -0.15814  
415B -> 437B -0.32382  
416B -> 437B -0.43219  
417B -> 437B 0.11007  
419B -> 437B 0.12507



Excited State 101: 1.000-A 2.5917 eV 478.40 nm f=0.0035 <S\*\*2>=0.000

|              |          |
|--------------|----------|
| 400A -> 437A | 0.11711  |
| 402A -> 437A | 0.20589  |
| 404A -> 437A | 0.17823  |
| 407A -> 437A | -0.14682 |
| 412A -> 437A | -0.19178 |
| 413A -> 437A | -0.17680 |
| 415A -> 437A | -0.12344 |
| 416A -> 437A | -0.32596 |
| 417A -> 437A | 0.14145  |
| 419A -> 437A | 0.36225  |
| 400B -> 437B | 0.11711  |
| 402B -> 437B | 0.20589  |
| 404B -> 437B | 0.17823  |
| 407B -> 437B | -0.14682 |
| 412B -> 437B | -0.19178 |
| 413B -> 437B | -0.17680 |
| 415B -> 437B | -0.12344 |
| 416B -> 437B | -0.32596 |
| 417B -> 437B | 0.14145  |
| 419B -> 437B | 0.36225  |

Excited State 102: 1.000-A 2.5943 eV 477.90 nm f=0.0279 <S\*\*2>=0.000

|              |          |
|--------------|----------|
| 413A -> 438A | -0.21481 |
| 414A -> 438A | 0.18668  |
| 415A -> 438A | 0.25018  |
| 416A -> 438A | -0.22463 |
| 418A -> 438A | 0.33469  |
| 419A -> 438A | 0.18391  |
| 420A -> 438A | -0.30044 |
| 421A -> 438A | 0.15821  |
| 413B -> 438B | -0.21481 |
| 414B -> 438B | 0.18668  |
| 415B -> 438B | 0.25018  |
| 416B -> 438B | -0.22463 |
| 418B -> 438B | 0.33469  |

419B -> 438B 0.18391  
420B -> 438B -0.30044  
421B -> 438B 0.15821

Excited State 103: 3.000-A 2.6075 eV 475.49 nm f=0.0000 <S\*\*2>=2.000

411A -> 437A 0.16765  
413A -> 437A 0.15012  
415A -> 437A -0.11085  
416A -> 437A 0.18234  
418A -> 437A -0.21991  
419A -> 437A 0.56325  
421A -> 437A -0.11979  
411B -> 437B -0.16765  
413B -> 437B -0.15012  
415B -> 437B 0.11085  
416B -> 437B -0.18234  
418B -> 437B 0.21991  
419B -> 437B -0.56325  
421B -> 437B 0.11979

Excited State 104: 3.000-A 2.6103 eV 474.98 nm f=0.0000 <S\*\*2>=2.000

431A -> 439A -0.21998  
433A -> 439A 0.44589  
434A -> 439A 0.45183  
435A -> 439A 0.11782  
436A -> 439A -0.13771  
431B -> 439B 0.21998  
433B -> 439B -0.44589  
434B -> 439B -0.45183  
435B -> 439B -0.11782  
436B -> 439B 0.13771

Excited State 105: 1.000-A 2.6117 eV 474.73 nm f=0.0013 <S\*\*2>=0.000

402A -> 437A -0.11104  
404A -> 437A -0.10633  
411A -> 437A 0.20016

413A -> 437A 0.26412  
415A -> 437A -0.13989  
416A -> 437A 0.20352  
418A -> 437A -0.18852  
419A -> 437A 0.46903  
421A -> 437A -0.11876  
402B -> 437B -0.11104  
404B -> 437B -0.10633  
411B -> 437B 0.20016  
413B -> 437B 0.26412  
415B -> 437B -0.13989  
416B -> 437B 0.20352  
418B -> 437B -0.18852  
419B -> 437B 0.46903  
421B -> 437B -0.11876

Excited State 106: 3.000-A 2.6142 eV 474.28 nm f=0.0000 <S\*\*2>=2.000

430A -> 440A -0.20305  
433A -> 440A -0.29281  
434A -> 440A 0.55108  
435A -> 440A -0.20772  
430B -> 440B 0.20305  
433B -> 440B 0.29281  
434B -> 440B -0.55108  
435B -> 440B 0.20772

Excited State 107: 3.000-A 2.6239 eV 472.51 nm f=0.0000 <S\*\*2>=2.000

395A -> 437A 0.10122  
400A -> 437A 0.12569  
409A -> 437A -0.22739  
412A -> 437A 0.48879  
413A -> 437A -0.14914  
415A -> 437A -0.24457  
416A -> 437A 0.12125  
395B -> 437B -0.10122  
400B -> 437B -0.12569

409B -> 437B 0.22739  
412B -> 437B -0.48879  
413B -> 437B 0.14914  
415B -> 437B 0.24457  
416B -> 437B -0.12125

Excited State 108: 1.000-A 2.6241 eV 472.48 nm f=0.0003 <S\*\*2>=0.000

431A -> 439A -0.19884  
433A -> 439A 0.44466  
434A -> 439A 0.47966  
435A -> 439A 0.11272  
436A -> 439A -0.12437  
431B -> 439B -0.19884  
433B -> 439B 0.44466  
434B -> 439B 0.47966  
435B -> 439B 0.11272  
436B -> 439B -0.12437

Excited State 109: 1.000-A 2.6300 eV 471.43 nm f=0.0002 <S\*\*2>=0.000

430A -> 440A -0.17889  
433A -> 440A -0.26127  
434A -> 440A 0.59693  
435A -> 440A -0.19034  
430B -> 440B -0.17889  
433B -> 440B -0.26127  
434B -> 440B 0.59693  
435B -> 440B -0.19034

Excited State 110: 1.000-A 2.6454 eV 468.67 nm f=0.0190 <S\*\*2>=0.000

402A -> 437A 0.18097  
403A -> 437A 0.15642  
405A -> 437A -0.14366  
411A -> 437A 0.22637  
411A -> 438A 0.16158  
412A -> 437A 0.43147  
413A -> 438A -0.10462

|              |          |
|--------------|----------|
| 414A -> 438A | 0.10918  |
| 415A -> 437A | -0.13446 |
| 402B -> 437B | 0.18097  |
| 403B -> 437B | 0.15642  |
| 405B -> 437B | -0.14366 |
| 411B -> 437B | 0.22637  |
| 411B -> 438B | 0.16158  |
| 412B -> 437B | 0.43147  |
| 413B -> 438B | -0.10462 |
| 414B -> 438B | 0.10918  |
| 415B -> 437B | -0.13446 |

Excited State 111: 1.000-A 2.6470 eV 468.40 nm f=0.0020 <S\*\*2>=0.000

|              |          |
|--------------|----------|
| 410A -> 438A | -0.13295 |
| 411A -> 438A | 0.42550  |
| 412A -> 437A | -0.17717 |
| 412A -> 438A | 0.14032  |
| 413A -> 438A | -0.21715 |
| 414A -> 438A | 0.26101  |
| 415A -> 438A | -0.12149 |
| 417A -> 438A | -0.12433 |
| 410B -> 438B | -0.13295 |
| 411B -> 438B | 0.42550  |
| 412B -> 437B | -0.17717 |
| 412B -> 438B | 0.14032  |
| 413B -> 438B | -0.21715 |
| 414B -> 438B | 0.26101  |
| 415B -> 438B | -0.12149 |
| 417B -> 438B | -0.12433 |

Excited State 112: 3.000-A 2.6524 eV 467.43 nm f=0.0000 <S\*\*2>=2.000

|              |          |
|--------------|----------|
| 408A -> 438A | -0.11172 |
| 410A -> 438A | -0.14060 |
| 412A -> 438A | -0.29394 |
| 413A -> 438A | 0.37004  |
| 414A -> 438A | -0.19794 |

|              |          |
|--------------|----------|
| 415A -> 438A | 0.18077  |
| 417A -> 438A | 0.23386  |
| 418A -> 438A | 0.25416  |
| 420A -> 438A | -0.13645 |
| 408B -> 438B | 0.11172  |
| 410B -> 438B | 0.14060  |
| 412B -> 438B | 0.29394  |
| 413B -> 438B | -0.37004 |
| 414B -> 438B | 0.19794  |
| 415B -> 438B | -0.18077 |
| 417B -> 438B | -0.23386 |
| 418B -> 438B | -0.25416 |
| 420B -> 438B | 0.13645  |

Excited State 113: 3.000-A 2.6586 eV 466.36 nm f=0.0000 <S\*\*2>=2.000

|              |          |
|--------------|----------|
| 404A -> 438A | 0.11533  |
| 405A -> 438A | -0.10714 |
| 406A -> 438A | 0.11312  |
| 409A -> 438A | 0.10877  |
| 413A -> 438A | 0.14080  |
| 414A -> 438A | 0.57726  |
| 415A -> 438A | 0.14279  |
| 416A -> 438A | -0.13775 |
| 404B -> 438B | -0.11533 |
| 405B -> 438B | 0.10714  |
| 406B -> 438B | -0.11312 |
| 409B -> 438B | -0.10877 |
| 413B -> 438B | -0.14080 |
| 414B -> 438B | -0.57726 |
| 415B -> 438B | -0.14279 |
| 416B -> 438B | 0.13775  |

Excited State 114: 1.000-A 2.6623 eV 465.71 nm f=0.0097 <S\*\*2>=0.000

|              |          |
|--------------|----------|
| 395A -> 437A | -0.13103 |
| 403A -> 437A | 0.25456  |
| 407A -> 437A | 0.17335  |

|              |          |
|--------------|----------|
| 408A -> 437A | -0.11505 |
| 409A -> 437A | 0.47278  |
| 410A -> 437A | -0.13315 |
| 411A -> 437A | -0.12378 |
| 412A -> 437A | -0.19541 |
| 413A -> 437A | 0.10153  |
| 436A -> 441A | 0.11931  |
| 436A -> 443A | 0.10553  |
| 395B -> 437B | -0.13103 |
| 403B -> 437B | 0.25456  |
| 407B -> 437B | 0.17335  |
| 408B -> 437B | -0.11505 |
| 409B -> 437B | 0.47278  |
| 410B -> 437B | -0.13315 |
| 411B -> 437B | -0.12378 |
| 412B -> 437B | -0.19541 |
| 413B -> 437B | 0.10153  |
| 436B -> 441B | 0.11931  |
| 436B -> 443B | 0.10553  |

Excited State 115: 3.000-A 2.6671 eV 464.86 nm f=0.0000 <S\*\*2>=2.000

|              |          |
|--------------|----------|
| 409A -> 437A | 0.12171  |
| 411A -> 437A | -0.20226 |
| 413A -> 437A | 0.13953  |
| 433A -> 443A | 0.11608  |
| 435A -> 441A | 0.22494  |
| 435A -> 443A | 0.11402  |
| 436A -> 441A | -0.36282 |
| 436A -> 442A | -0.22544 |
| 436A -> 443A | -0.18081 |
| 409B -> 437B | -0.12171 |
| 411B -> 437B | 0.20226  |
| 413B -> 437B | -0.13953 |
| 433B -> 443B | -0.11608 |
| 435B -> 441B | -0.22494 |
| 435B -> 443B | -0.11402 |

436B -> 441B 0.36282  
436B -> 442B 0.22544  
436B -> 443B 0.18081

Excited State 116: 1.000-A 2.6710 eV 464.18 nm f=0.0018 <S\*\*2>=0.000

411A -> 438A 0.23672  
412A -> 438A -0.29402  
413A -> 438A 0.41403  
414A -> 438A 0.16148  
417A -> 438A 0.27964  
418A -> 438A 0.15977  
411B -> 438B 0.23672  
412B -> 438B -0.29402  
413B -> 438B 0.41403  
414B -> 438B 0.16148  
417B -> 438B 0.27964  
418B -> 438B 0.15977

Excited State 117: 1.000-A 2.6732 eV 463.80 nm f=0.0051 <S\*\*2>=0.000

408A -> 438A 0.15806  
410A -> 438A 0.33758  
411A -> 438A -0.14077  
413A -> 438A 0.13531  
414A -> 438A 0.50425  
418A -> 438A -0.14932  
408B -> 438B 0.15806  
410B -> 438B 0.33758  
411B -> 438B -0.14077  
413B -> 438B 0.13531  
414B -> 438B 0.50425  
418B -> 438B -0.14932

Excited State 118: 3.000-A 2.6801 eV 462.61 nm f=0.0000 <S\*\*2>=2.000

395A -> 437A -0.13137  
400A -> 437A -0.12064  
409A -> 437A -0.25001



|              |          |
|--------------|----------|
| 411A -> 437A | 0.36131  |
| 413A -> 437A | -0.19018 |
| 415A -> 437A | 0.18850  |
| 433A -> 440A | 0.12599  |
| 433A -> 442A | -0.12552 |
| 435A -> 442A | 0.11438  |
| 436A -> 441A | -0.16676 |
| 436A -> 442A | -0.14602 |
| 395B -> 437B | 0.13137  |
| 400B -> 437B | 0.12064  |
| 409B -> 437B | 0.25001  |
| 411B -> 437B | -0.36131 |
| 413B -> 437B | 0.19018  |
| 415B -> 437B | -0.18850 |
| 433B -> 440B | -0.12599 |
| 433B -> 442B | 0.12552  |
| 435B -> 442B | -0.11438 |
| 436B -> 441B | 0.16676  |
| 436B -> 442B | 0.14602  |

Excited State 119: 3.000-A 2.6823 eV 462.23 nm f=0.0000 <S\*\*2>=2.000

|              |          |
|--------------|----------|
| 411A -> 437A | 0.12342  |
| 433A -> 440A | -0.51011 |
| 434A -> 440A | -0.32909 |
| 435A -> 441A | 0.11281  |
| 411B -> 437B | -0.12342 |
| 433B -> 440B | 0.51011  |
| 434B -> 440B | 0.32909  |
| 435B -> 441B | -0.11281 |

Excited State 120: 3.000-A 2.6844 eV 461.86 nm f=0.0000 <S\*\*2>=2.000

|              |          |
|--------------|----------|
| 400A -> 438A | -0.11761 |
| 403A -> 438A | -0.14956 |
| 404A -> 438A | 0.14211  |
| 405A -> 438A | -0.11961 |
| 407A -> 438A | 0.11433  |

|              |          |
|--------------|----------|
| 409A -> 438A | 0.11758  |
| 410A -> 438A | -0.24488 |
| 411A -> 438A | -0.23658 |
| 412A -> 438A | 0.26701  |
| 413A -> 438A | -0.16331 |
| 414A -> 438A | -0.20642 |
| 416A -> 438A | -0.17903 |
| 417A -> 438A | -0.14898 |
| 418A -> 438A | 0.12766  |
| 420A -> 438A | -0.12746 |
| 400B -> 438B | 0.11761  |
| 403B -> 438B | 0.14956  |
| 404B -> 438B | -0.14211 |
| 405B -> 438B | 0.11961  |
| 407B -> 438B | -0.11433 |
| 409B -> 438B | -0.11758 |
| 410B -> 438B | 0.24488  |
| 411B -> 438B | 0.23658  |
| 412B -> 438B | -0.26701 |
| 413B -> 438B | 0.16331  |
| 414B -> 438B | 0.20642  |
| 416B -> 438B | 0.17903  |
| 417B -> 438B | 0.14898  |
| 418B -> 438B | -0.12766 |
| 420B -> 438B | 0.12746  |

Excited State 121: 1.000-A 2.6853 eV 461.72 nm f=0.0000 <S\*\*2>=0.000

|              |         |
|--------------|---------|
| 433A -> 440A | 0.62509 |
| 434A -> 440A | 0.29730 |
| 433B -> 440B | 0.62509 |
| 434B -> 440B | 0.29730 |

Excited State 122: 1.000-A 2.6876 eV 461.32 nm f=0.0021 <S\*\*2>=0.000

|              |          |
|--------------|----------|
| 400A -> 437A | -0.18773 |
| 403A -> 437A | 0.14356  |
| 407A -> 437A | 0.19160  |

|              |          |
|--------------|----------|
| 408A -> 437A | -0.10462 |
| 409A -> 437A | -0.16622 |
| 411A -> 437A | 0.40774  |
| 412A -> 437A | -0.24041 |
| 413A -> 437A | -0.21070 |
| 415A -> 437A | 0.19603  |
| 400B -> 437B | -0.18773 |
| 403B -> 437B | 0.14356  |
| 407B -> 437B | 0.19160  |
| 408B -> 437B | -0.10462 |
| 409B -> 437B | -0.16622 |
| 411B -> 437B | 0.40774  |
| 412B -> 437B | -0.24041 |
| 413B -> 437B | -0.21070 |
| 415B -> 437B | 0.19603  |

Excited State 123: 3.000-A 2.6910 eV 460.74 nm f=0.0000 <S\*\*2>=2.000

|              |          |
|--------------|----------|
| 430A -> 441A | 0.16409  |
| 430A -> 442A | -0.14225 |
| 433A -> 440A | -0.28494 |
| 433A -> 441A | 0.16701  |
| 433A -> 442A | -0.10448 |
| 434A -> 441A | -0.16939 |
| 434A -> 442A | 0.17846  |
| 435A -> 441A | -0.22965 |
| 435A -> 442A | 0.20806  |
| 435A -> 443A | 0.14902  |
| 436A -> 441A | -0.13671 |
| 436A -> 442A | 0.13161  |
| 430B -> 441B | -0.16409 |
| 430B -> 442B | 0.14225  |
| 433B -> 440B | 0.28494  |
| 433B -> 441B | -0.16701 |
| 433B -> 442B | 0.10448  |
| 434B -> 441B | 0.16939  |
| 434B -> 442B | -0.17846 |

435B -> 441B 0.22965  
435B -> 442B -0.20806  
435B -> 443B -0.14902  
436B -> 441B 0.13671  
436B -> 442B -0.13161

Excited State 124: 3.000-A 2.6929 eV 460.41 nm f=0.0000 <S\*\*2>=2.000

411A -> 437A 0.12393  
415A -> 437A 0.10522  
431A -> 442A -0.12972  
433A -> 441A 0.11009  
433A -> 442A 0.19534  
434A -> 441A 0.13677  
434A -> 442A 0.12563  
435A -> 441A 0.12562  
435A -> 442A -0.11332  
435A -> 443A 0.17193  
436A -> 442A 0.20387  
436A -> 443A -0.37658  
411B -> 437B -0.12393  
415B -> 437B -0.10522  
431B -> 442B 0.12972  
433B -> 441B -0.11009  
433B -> 442B -0.19534  
434B -> 441B -0.13677  
434B -> 442B -0.12563  
435B -> 441B -0.12562  
435B -> 442B 0.11332  
435B -> 443B -0.17193  
436B -> 442B -0.20387  
436B -> 443B 0.37658

Excited State 125: 3.000-A 2.7056 eV 458.25 nm f=0.0000 <S\*\*2>=2.000

433A -> 439A -0.48013  
434A -> 439A 0.48950  
433B -> 439B 0.48013

434B -> 439B -0.48950

Excited State 126: 1.000-A 2.7068 eV 458.04 nm f=0.0001 <S\*\*2>=0.000

433A -> 439A 0.49640

434A -> 439A -0.47935

433B -> 439B 0.49640

434B -> 439B -0.47935

Excited State 127: 3.000-A 2.7079 eV 457.85 nm f=0.0000 <S\*\*2>=2.000

413A -> 438A -0.29909

415A -> 438A -0.18187

416A -> 438A 0.14193

417A -> 438A 0.51960

418A -> 438A 0.21849

413B -> 438B 0.29909

415B -> 438B 0.18187

416B -> 438B -0.14193

417B -> 438B -0.51960

418B -> 438B -0.21849

Excited State 128: 1.000-A 2.7095 eV 457.58 nm f=0.0011 <S\*\*2>=0.000

411A -> 438A -0.11733

413A -> 438A -0.30910

414A -> 438A 0.10714

415A -> 438A -0.20054

416A -> 438A 0.16038

417A -> 438A 0.49873

418A -> 438A 0.16689

411B -> 438B -0.11733

413B -> 438B -0.30910

414B -> 438B 0.10714

415B -> 438B -0.20054

416B -> 438B 0.16038

417B -> 438B 0.49873

418B -> 438B 0.16689

Excited State 129: 3.000-A 2.7157 eV 456.55 nm f=0.0000 <S\*\*2>=2.000

|              |          |
|--------------|----------|
| 398A -> 437A | -0.11375 |
| 401A -> 437A | -0.15540 |
| 403A -> 437A | -0.23212 |
| 408A -> 437A | -0.12828 |
| 409A -> 437A | 0.39804  |
| 410A -> 437A | -0.27725 |
| 411A -> 437A | 0.15379  |
| 412A -> 437A | 0.23384  |
| 414A -> 437A | 0.19507  |
| 398B -> 437B | 0.11375  |
| 401B -> 437B | 0.15540  |
| 403B -> 437B | 0.23212  |
| 408B -> 437B | 0.12828  |
| 409B -> 437B | -0.39804 |
| 410B -> 437B | 0.27725  |
| 411B -> 437B | -0.15379 |
| 412B -> 437B | -0.23384 |
| 414B -> 437B | -0.19507 |

Excited State 130: 1.000-A 2.7281 eV 454.47 nm f=0.0017 <S\*\*2>=0.000

|              |          |
|--------------|----------|
| 403A -> 437A | -0.23238 |
| 409A -> 437A | 0.19534  |
| 410A -> 437A | -0.21580 |
| 411A -> 437A | 0.16646  |
| 412A -> 437A | 0.10791  |
| 414A -> 437A | 0.50748  |
| 416A -> 437A | -0.12410 |
| 403B -> 437B | -0.23238 |
| 409B -> 437B | 0.19534  |
| 410B -> 437B | -0.21580 |
| 411B -> 437B | 0.16646  |
| 412B -> 437B | 0.10791  |
| 414B -> 437B | 0.50748  |
| 416B -> 437B | -0.12410 |

Excited State 131: 3.000-A 2.7337 eV 453.53 nm f=0.0000 <S\*\*2>=2.000

|              |          |
|--------------|----------|
| 401A -> 437A | 0.10514  |
| 409A -> 437A | -0.16233 |
| 413A -> 437A | 0.22580  |
| 414A -> 437A | 0.60554  |
| 401B -> 437B | -0.10514 |
| 409B -> 437B | 0.16233  |
| 413B -> 437B | -0.22580 |
| 414B -> 437B | -0.60554 |

Excited State 132: 1.000-A 2.7371 eV 452.98 nm f=0.0155 <S\*\*2>=0.000

|              |          |
|--------------|----------|
| 402A -> 438A | 0.11557  |
| 407A -> 438A | 0.12297  |
| 408A -> 438A | -0.10744 |
| 412A -> 438A | 0.48464  |
| 413A -> 438A | 0.19839  |
| 416A -> 438A | -0.24888 |
| 417A -> 438A | 0.17000  |
| 418A -> 438A | 0.17356  |
| 402B -> 438B | 0.11557  |
| 407B -> 438B | 0.12297  |
| 408B -> 438B | -0.10744 |
| 412B -> 438B | 0.48464  |
| 413B -> 438B | 0.19839  |
| 416B -> 438B | -0.24888 |
| 417B -> 438B | 0.17000  |
| 418B -> 438B | 0.17356  |

Excited State 133: 3.000-A 2.7377 eV 452.88 nm f=0.0000 <S\*\*2>=2.000

|              |          |
|--------------|----------|
| 402A -> 438A | 0.16042  |
| 408A -> 438A | -0.11875 |
| 410A -> 438A | 0.22517  |
| 411A -> 438A | 0.17986  |
| 412A -> 438A | 0.40734  |
| 413A -> 438A | 0.21036  |
| 416A -> 438A | -0.22594 |

417A -> 438A 0.17101  
418A -> 438A 0.13505  
402B -> 438B -0.16042  
408B -> 438B 0.11875  
410B -> 438B -0.22517  
411B -> 438B -0.17986  
412B -> 438B -0.40734  
413B -> 438B -0.21036  
416B -> 438B 0.22594  
417B -> 438B -0.17101  
418B -> 438B -0.13505

Excited State 134: 1.000-A 2.7403 eV 452.45 nm f=0.0015 <S\*\*2>=0.000

403A -> 437A 0.25187  
405A -> 437A -0.10460  
407A -> 437A 0.12033  
409A -> 437A -0.33850  
411A -> 437A -0.18853  
413A -> 437A 0.24577  
414A -> 437A 0.37908  
403B -> 437B 0.25187  
405B -> 437B -0.10460  
407B -> 437B 0.12033  
409B -> 437B -0.33850  
411B -> 437B -0.18853  
413B -> 437B 0.24577  
414B -> 437B 0.37908

Excited State 135: 3.000-A 2.7469 eV 451.36 nm f=0.0000 <S\*\*2>=2.000

398A -> 437A 0.12821  
399A -> 437A 0.13857  
401A -> 437A 0.24967  
404A -> 437A -0.11257  
405A -> 437A 0.23849  
406A -> 437A -0.14600  
407A -> 437A -0.14068



|              |          |
|--------------|----------|
| 408A -> 437A | 0.31257  |
| 409A -> 437A | 0.16280  |
| 411A -> 437A | 0.28099  |
| 416A -> 437A | -0.11695 |
| 398B -> 437B | -0.12821 |
| 399B -> 437B | -0.13857 |
| 401B -> 437B | -0.24967 |
| 404B -> 437B | 0.11257  |
| 405B -> 437B | -0.23849 |
| 406B -> 437B | 0.14600  |
| 407B -> 437B | 0.14068  |
| 408B -> 437B | -0.31257 |
| 409B -> 437B | -0.16280 |
| 411B -> 437B | -0.28099 |
| 416B -> 437B | 0.11695  |

Excited State 136: 1.000-A 2.7551 eV 450.01 nm f=0.0127 <S\*\*2>=0.000

|              |          |
|--------------|----------|
| 402A -> 438A | 0.15838  |
| 403A -> 438A | 0.16697  |
| 404A -> 438A | -0.25610 |
| 405A -> 438A | 0.22707  |
| 406A -> 438A | -0.21988 |
| 409A -> 438A | -0.20097 |
| 410A -> 438A | 0.33939  |
| 411A -> 438A | 0.23873  |
| 402B -> 438B | 0.15838  |
| 403B -> 438B | 0.16697  |
| 404B -> 438B | -0.25610 |
| 405B -> 438B | 0.22707  |
| 406B -> 438B | -0.21988 |
| 409B -> 438B | -0.20097 |
| 410B -> 438B | 0.33939  |
| 411B -> 438B | 0.23873  |

Excited State 137: 3.000-A 2.7686 eV 447.81 nm f=0.0000 <S\*\*2>=2.000

|              |          |
|--------------|----------|
| 397A -> 438A | -0.11366 |
|--------------|----------|

|              |          |
|--------------|----------|
| 410A -> 438A | -0.11910 |
| 411A -> 438A | 0.10677  |
| 415A -> 438A | 0.12153  |
| 434A -> 444A | 0.11491  |
| 435A -> 443A | -0.19439 |
| 435A -> 444A | -0.41384 |
| 436A -> 443A | -0.12399 |
| 436A -> 444A | -0.32212 |
| 397B -> 438B | 0.11366  |
| 410B -> 438B | 0.11910  |
| 411B -> 438B | -0.10677 |
| 415B -> 438B | -0.12153 |
| 434B -> 444B | -0.11491 |
| 435B -> 443B | 0.19439  |
| 435B -> 444B | 0.41384  |
| 436B -> 443B | 0.12399  |
| 436B -> 444B | 0.32212  |

Excited State 138: 1.000-A 2.7699 eV 447.61 nm f=0.0006 <S\*\*2>=0.000

|              |          |
|--------------|----------|
| 401A -> 437A | 0.29174  |
| 403A -> 437A | 0.23491  |
| 405A -> 437A | 0.14987  |
| 406A -> 437A | -0.14639 |
| 407A -> 437A | -0.23361 |
| 408A -> 437A | 0.34702  |
| 410A -> 437A | 0.17803  |
| 411A -> 437A | 0.23760  |
| 401B -> 437B | 0.29174  |
| 403B -> 437B | 0.23491  |
| 405B -> 437B | 0.14987  |
| 406B -> 437B | -0.14639 |
| 407B -> 437B | -0.23361 |
| 408B -> 437B | 0.34702  |
| 410B -> 437B | 0.17803  |
| 411B -> 437B | 0.23760  |

Excited State 139: 3.000-A 2.7744 eV 446.88 nm f=0.0000 <S\*\*2>=2.000

|              |          |
|--------------|----------|
| 399A -> 438A | 0.16065  |
| 400A -> 438A | -0.20343 |
| 401A -> 438A | -0.15281 |
| 402A -> 438A | 0.21866  |
| 403A -> 438A | -0.12974 |
| 407A -> 438A | 0.11741  |
| 408A -> 438A | -0.17661 |
| 409A -> 438A | 0.19319  |
| 415A -> 438A | 0.23898  |
| 416A -> 438A | 0.35261  |
| 435A -> 444A | 0.13951  |
| 436A -> 444A | 0.10338  |
| 399B -> 438B | -0.16065 |
| 400B -> 438B | 0.20343  |
| 401B -> 438B | 0.15281  |
| 402B -> 438B | -0.21866 |
| 403B -> 438B | 0.12974  |
| 407B -> 438B | -0.11741 |
| 408B -> 438B | 0.17661  |
| 409B -> 438B | -0.19319 |
| 415B -> 438B | -0.23898 |
| 416B -> 438B | -0.35261 |
| 435B -> 444B | -0.13951 |
| 436B -> 444B | -0.10338 |

Excited State 140: 1.000-A 2.7814 eV 445.77 nm f=0.0014 <S\*\*2>=0.000

|              |          |
|--------------|----------|
| 402A -> 438A | 0.14657  |
| 408A -> 438A | -0.15282 |
| 409A -> 438A | 0.12544  |
| 410A -> 438A | 0.12193  |
| 412A -> 438A | 0.15002  |
| 415A -> 438A | 0.42334  |
| 416A -> 438A | 0.42468  |
| 402B -> 438B | 0.14657  |
| 408B -> 438B | -0.15282 |

409B -> 438B 0.12544  
410B -> 438B 0.12193  
412B -> 438B 0.15002  
415B -> 438B 0.42334  
416B -> 438B 0.42468

Excited State 141: 3.000-A 2.7913 eV 444.18 nm f=0.0000 <S\*\*2>=2.000

399A -> 438A -0.14968  
400A -> 438A 0.22518  
401A -> 438A 0.11404  
402A -> 438A -0.14816  
403A -> 438A 0.13268  
409A -> 438A -0.13178  
412A -> 438A 0.29591  
415A -> 438A 0.38863  
416A -> 438A 0.28296  
399B -> 438B 0.14968  
400B -> 438B -0.22518  
401B -> 438B -0.11404  
402B -> 438B 0.14816  
403B -> 438B -0.13268  
409B -> 438B 0.13178  
412B -> 438B -0.29591  
415B -> 438B -0.38863  
416B -> 438B -0.28296

Excited State 142: 3.000-A 2.7944 eV 443.70 nm f=0.0000 <S\*\*2>=2.000

394A -> 437A 0.10970  
398A -> 437A 0.15177  
399A -> 437A 0.15864  
402A -> 437A 0.19463  
403A -> 437A -0.29757  
404A -> 437A -0.16691  
405A -> 437A 0.10550  
407A -> 437A 0.45796  
408A -> 437A -0.10877

|              |          |
|--------------|----------|
| 394B -> 437B | -0.10970 |
| 398B -> 437B | -0.15177 |
| 399B -> 437B | -0.15864 |
| 402B -> 437B | -0.19463 |
| 403B -> 437B | 0.29757  |
| 404B -> 437B | 0.16691  |
| 405B -> 437B | -0.10550 |
| 407B -> 437B | -0.45796 |
| 408B -> 437B | 0.10877  |

Excited State 143: 1.000-A 2.8111 eV 441.05 nm f=0.0038 <S\*\*2>=0.000

|              |          |
|--------------|----------|
| 400A -> 438A | 0.23494  |
| 401A -> 438A | 0.15061  |
| 402A -> 438A | -0.20714 |
| 403A -> 438A | 0.15806  |
| 407A -> 438A | -0.12266 |
| 408A -> 438A | 0.26407  |
| 409A -> 438A | -0.25223 |
| 412A -> 438A | 0.28614  |
| 413A -> 438A | 0.11485  |
| 415A -> 438A | 0.21510  |
| 416A -> 438A | 0.11583  |
| 400B -> 438B | 0.23494  |
| 401B -> 438B | 0.15061  |
| 402B -> 438B | -0.20714 |
| 403B -> 438B | 0.15806  |
| 407B -> 438B | -0.12266 |
| 408B -> 438B | 0.26407  |
| 409B -> 438B | -0.25223 |
| 412B -> 438B | 0.28614  |
| 413B -> 438B | 0.11485  |
| 415B -> 438B | 0.21510  |
| 416B -> 438B | 0.11583  |

Excited State 144: 3.000-A 2.8154 eV 440.38 nm f=0.0000 <S\*\*2>=2.000

|              |         |
|--------------|---------|
| 398A -> 438A | 0.11753 |
|--------------|---------|

|              |          |
|--------------|----------|
| 399A -> 438A | -0.15461 |
| 401A -> 437A | -0.27446 |
| 401A -> 438A | 0.12342  |
| 404A -> 437A | 0.13729  |
| 405A -> 437A | 0.24580  |
| 408A -> 437A | -0.15642 |
| 410A -> 437A | 0.34003  |
| 410A -> 438A | 0.14688  |
| 411A -> 438A | -0.10925 |
| 398B -> 438B | -0.11753 |
| 399B -> 438B | 0.15461  |
| 401B -> 437B | 0.27446  |
| 401B -> 438B | -0.12342 |
| 404B -> 437B | -0.13729 |
| 405B -> 437B | -0.24580 |
| 408B -> 437B | 0.15642  |
| 410B -> 437B | -0.34003 |
| 410B -> 438B | -0.14688 |
| 411B -> 438B | 0.10925  |

Excited State 145: 3.000-A 2.8177 eV 440.02 nm f=0.0000 <S\*\*2>=2.000

|              |          |
|--------------|----------|
| 397A -> 438A | 0.13248  |
| 398A -> 438A | 0.18480  |
| 399A -> 438A | -0.23093 |
| 401A -> 437A | 0.21603  |
| 401A -> 438A | 0.14315  |
| 404A -> 437A | -0.11775 |
| 404A -> 438A | -0.10641 |
| 405A -> 437A | -0.15563 |
| 405A -> 438A | 0.14065  |
| 408A -> 438A | -0.14048 |
| 409A -> 438A | 0.13396  |
| 410A -> 437A | -0.18297 |
| 410A -> 438A | 0.27178  |
| 411A -> 438A | -0.15201 |
| 397B -> 438B | -0.13248 |

398B -> 438B -0.18480  
399B -> 438B 0.23093  
401B -> 437B -0.21603  
401B -> 438B -0.14315  
404B -> 437B 0.11775  
404B -> 438B 0.10641  
405B -> 437B 0.15563  
405B -> 438B -0.14065  
408B -> 438B 0.14048  
409B -> 438B -0.13396  
410B -> 437B 0.18297  
410B -> 438B -0.27178  
411B -> 438B 0.15201

Excited State 146: 1.000-A 2.8198 eV 439.69 nm f=0.0029 <S\*\*2>=0.000

401A -> 437A 0.41572  
403A -> 437A -0.24098  
404A -> 437A -0.27060  
405A -> 437A -0.18280  
407A -> 437A 0.21005  
408A -> 437A 0.17195  
410A -> 437A -0.19818  
401B -> 437B 0.41572  
403B -> 437B -0.24098  
404B -> 437B -0.27060  
405B -> 437B -0.18280  
407B -> 437B 0.21005  
408B -> 437B 0.17195  
410B -> 437B -0.19818

Excited State 147: 1.000-A 2.8273 eV 438.52 nm f=0.0005 <S\*\*2>=0.000

400A -> 437A 0.12310  
402A -> 437A 0.16534  
403A -> 437A -0.16688  
405A -> 437A 0.16955  
407A -> 437A 0.33358

408A -> 437A -0.14135  
410A -> 437A 0.46290  
411A -> 437A 0.11044  
400B -> 437B 0.12310  
402B -> 437B 0.16534  
403B -> 437B -0.16688  
405B -> 437B 0.16955  
407B -> 437B 0.33358  
408B -> 437B -0.14135  
410B -> 437B 0.46290  
411B -> 437B 0.11044

Excited State 148: 3.000-A 2.8390 eV 436.72 nm f=0.0000 <S\*\*2>=2.000

398A -> 437A -0.11062  
403A -> 437A -0.11445  
404A -> 437A -0.25300  
405A -> 437A -0.36187  
408A -> 437A -0.11038  
408A -> 438A -0.10128  
409A -> 437A 0.14588  
410A -> 437A 0.42285  
398B -> 437B 0.11062  
403B -> 437B 0.11445  
404B -> 437B 0.25300  
405B -> 437B 0.36187  
408B -> 437B 0.11038  
408B -> 438B 0.10128  
409B -> 437B -0.14588  
410B -> 437B -0.42285

Excited State 149: 3.000-A 2.8416 eV 436.32 nm f=0.0000 <S\*\*2>=2.000

400A -> 438A -0.14375  
401A -> 438A 0.24503  
403A -> 438A -0.12139  
405A -> 438A 0.17538  
406A -> 438A -0.13111



|              |          |
|--------------|----------|
| 408A -> 438A | 0.46173  |
| 410A -> 438A | -0.12970 |
| 411A -> 438A | 0.11812  |
| 413A -> 438A | 0.13203  |
| 400B -> 438B | 0.14375  |
| 401B -> 438B | -0.24503 |
| 403B -> 438B | 0.12139  |
| 405B -> 438B | -0.17538 |
| 406B -> 438B | 0.13111  |
| 408B -> 438B | -0.46173 |
| 410B -> 438B | 0.12970  |
| 411B -> 438B | -0.11812 |
| 413B -> 438B | -0.13203 |

Excited State 150: 1.000-A 2.8459 eV 435.66 nm f=0.0008 <S\*\*2>=0.000

|              |          |
|--------------|----------|
| 404A -> 437A | 0.28752  |
| 405A -> 437A | 0.47797  |
| 407A -> 437A | 0.24533  |
| 408A -> 437A | 0.11006  |
| 409A -> 437A | -0.11350 |
| 410A -> 437A | -0.28325 |
| 404B -> 437B | 0.28752  |
| 405B -> 437B | 0.47797  |
| 407B -> 437B | 0.24533  |
| 408B -> 437B | 0.11006  |
| 409B -> 437B | -0.11350 |
| 410B -> 437B | -0.28325 |

Excited State 151: 1.000-A 2.8592 eV 433.64 nm f=0.0037 <S\*\*2>=0.000

|              |          |
|--------------|----------|
| 397A -> 438A | -0.15610 |
| 400A -> 438A | -0.16796 |
| 402A -> 438A | 0.22666  |
| 403A -> 438A | -0.10700 |
| 406A -> 438A | -0.15471 |
| 407A -> 438A | 0.16305  |
| 408A -> 438A | 0.50021  |

410A -> 438A -0.12717  
411A -> 438A 0.11922  
397B -> 438B -0.15610  
400B -> 438B -0.16796  
402B -> 438B 0.22666  
403B -> 438B -0.10700  
406B -> 438B -0.15471  
407B -> 438B 0.16305  
408B -> 438B 0.50021  
410B -> 438B -0.12717  
411B -> 438B 0.11922

Excited State 152: 3.000-A 2.8707 eV 431.89 nm f=0.0000 <S\*\*2>=2.000

398A -> 437A -0.21867  
399A -> 437A -0.12507  
400A -> 437A 0.13689  
401A -> 437A 0.31807  
402A -> 437A -0.16697  
403A -> 437A -0.10162  
404A -> 437A 0.30165  
405A -> 437A 0.14568  
407A -> 437A 0.21121  
435A -> 445A 0.10095  
398B -> 437B 0.21867  
399B -> 437B 0.12507  
400B -> 437B -0.13689  
401B -> 437B -0.31807  
402B -> 437B 0.16697  
403B -> 437B 0.10162  
404B -> 437B -0.30165  
405B -> 437B -0.14568  
407B -> 437B -0.21121  
435B -> 445B -0.10095

Excited State 153: 1.000-A 2.8763 eV 431.05 nm f=0.0074 <S\*\*2>=0.000

399A -> 438A -0.20504

|              |          |
|--------------|----------|
| 401A -> 438A | 0.45106  |
| 402A -> 438A | -0.10931 |
| 404A -> 438A | -0.14161 |
| 405A -> 438A | 0.17113  |
| 406A -> 438A | 0.13987  |
| 407A -> 438A | -0.24819 |
| 409A -> 438A | 0.25703  |
| 399B -> 438B | -0.20504 |
| 401B -> 438B | 0.45106  |
| 402B -> 438B | -0.10931 |
| 404B -> 438B | -0.14161 |
| 405B -> 438B | 0.17113  |
| 406B -> 438B | 0.13987  |
| 407B -> 438B | -0.24819 |
| 409B -> 438B | 0.25703  |

Excited State 154: 3.000-A 2.8767 eV 430.99 nm f=0.0000 <S\*\*2>=2.000

|              |          |
|--------------|----------|
| 393A -> 440A | -0.12820 |
| 401A -> 437A | 0.15360  |
| 401A -> 438A | 0.12246  |
| 404A -> 437A | 0.15267  |
| 406A -> 438A | 0.12660  |
| 407A -> 438A | -0.14320 |
| 408A -> 438A | -0.11547 |
| 432A -> 440A | 0.25777  |
| 433A -> 445A | 0.11014  |
| 434A -> 445A | -0.13353 |
| 435A -> 445A | -0.19694 |
| 436A -> 442A | -0.10391 |
| 436A -> 445A | -0.13207 |
| 393B -> 440B | 0.12820  |
| 401B -> 437B | -0.15360 |
| 401B -> 438B | -0.12246 |
| 404B -> 437B | -0.15267 |
| 406B -> 438B | -0.12660 |
| 407B -> 438B | 0.14320  |

408B -> 438B 0.11547  
432B -> 440B -0.25777  
433B -> 445B -0.11014  
434B -> 445B 0.13353  
435B -> 445B 0.19694  
436B -> 442B 0.10391  
436B -> 445B 0.13207

Excited State 155: 3.000-A 2.8830 eV 430.05 nm f=0.0000 <S\*\*2>=2.000

393A -> 440A -0.21378  
398A -> 438A 0.15434  
400A -> 438A 0.13065  
401A -> 438A -0.24920  
406A -> 438A -0.24763  
407A -> 438A 0.26500  
408A -> 438A 0.10972  
432A -> 440A 0.32682  
393B -> 440B 0.21378  
398B -> 438B -0.15434  
400B -> 438B -0.13065  
401B -> 438B 0.24920  
406B -> 438B 0.24763  
407B -> 438B -0.26500  
408B -> 438B -0.10972  
432B -> 440B -0.32682

Excited State 156: 3.000-A 2.8840 eV 429.90 nm f=0.0000 <S\*\*2>=2.000

392A -> 439A 0.21967  
393A -> 440A -0.17700  
401A -> 438A 0.15472  
406A -> 438A 0.14351  
407A -> 438A -0.15807  
431A -> 439A 0.13144  
432A -> 439A 0.25878  
432A -> 440A 0.22601  
435A -> 445A 0.10938

392B -> 439B -0.21967  
393B -> 440B 0.17700  
401B -> 438B -0.15472  
406B -> 438B -0.14351  
407B -> 438B 0.15807  
431B -> 439B -0.13144  
432B -> 439B -0.25878  
432B -> 440B -0.22601  
435B -> 445B -0.10938

Excited State 157: 3.000-A 2.8854 eV 429.70 nm f=0.0000 <S\*\*2>=2.000

392A -> 439A 0.31775  
393A -> 440A 0.14412  
431A -> 439A 0.18990  
432A -> 439A 0.35571  
432A -> 440A -0.17320  
435A -> 445A -0.11527  
392B -> 439B -0.31775  
393B -> 440B -0.14412  
431B -> 439B -0.18990  
432B -> 439B -0.35571  
432B -> 440B 0.17320  
435B -> 445B 0.11527

Excited State 158: 3.000-A 2.8912 eV 428.83 nm f=0.0000 <S\*\*2>=2.000

400A -> 437A 0.54982  
402A -> 437A -0.14448  
404A -> 437A -0.16784  
408A -> 437A 0.14219  
410A -> 437A -0.13184  
412A -> 437A -0.11076  
400B -> 437B -0.54982  
402B -> 437B 0.14448  
404B -> 437B 0.16784  
408B -> 437B -0.14219  
410B -> 437B 0.13184

412B -> 437B 0.11076

Excited State 159: 1.000-A 2.8946 eV 428.34 nm f=0.0121 <S\*\*2>=0.000

395A -> 437A -0.23218

398A -> 437A -0.12385

399A -> 437A -0.16874

400A -> 437A -0.32545

401A -> 437A 0.21759

404A -> 437A 0.34181

408A -> 437A -0.12871

410A -> 437A 0.14057

436A -> 441A -0.17435

436A -> 443A -0.10804

395B -> 437B -0.23218

398B -> 437B -0.12385

399B -> 437B -0.16874

400B -> 437B -0.32545

401B -> 437B 0.21759

404B -> 437B 0.34181

408B -> 437B -0.12871

410B -> 437B 0.14057

436B -> 441B -0.17435

436B -> 443B -0.10804

Excited State 160: 1.000-A 2.9058 eV 426.68 nm f=0.0007 <S\*\*2>=0.000

432A -> 440A 0.69156

432B -> 440B 0.69156

Excited State 161: 1.000-A 2.9073 eV 426.45 nm f=0.0005 <S\*\*2>=0.000

397A -> 438A -0.14547

399A -> 438A 0.14621

400A -> 438A -0.14887

402A -> 438A 0.12841

406A -> 437A 0.24576

406A -> 438A 0.46076

407A -> 438A -0.11380

409A -> 438A -0.27852  
397B -> 438B -0.14547  
399B -> 438B 0.14621  
400B -> 438B -0.14887  
402B -> 438B 0.12841  
406B -> 437B 0.24576  
406B -> 438B 0.46076  
407B -> 438B -0.11380  
409B -> 438B -0.27852

Excited State 162: 3.000-A 2.9100 eV 426.06 nm f=0.0000 <S\*\*2>=2.000

401A -> 437A 0.10103  
404A -> 437A -0.19991  
405A -> 437A 0.22438  
406A -> 437A 0.49988  
407A -> 437A -0.20588  
408A -> 437A -0.17762  
432A -> 439A -0.10661  
401B -> 437B -0.10103  
404B -> 437B 0.19991  
405B -> 437B -0.22438  
406B -> 437B -0.49988  
407B -> 437B 0.20588  
408B -> 437B 0.17762  
432B -> 439B 0.10661

Excited State 163: 3.000-A 2.9108 eV 425.94 nm f=0.0000 <S\*\*2>=2.000

393A -> 440A 0.43266  
407A -> 440A -0.10051  
432A -> 440A 0.43357  
393B -> 440B -0.43266  
407B -> 440B 0.10051  
432B -> 440B -0.43357

Excited State 164: 1.000-A 2.9116 eV 425.83 nm f=0.0004 <S\*\*2>=0.000

395A -> 437A 0.10126

401A -> 437A 0.17422  
 402A -> 437A -0.15515  
 405A -> 437A 0.15779  
 406A -> 437A 0.51647  
 406A -> 438A -0.20874  
 407A -> 437A -0.13922  
 409A -> 438A 0.12066  
 395B -> 437B 0.10126  
 401B -> 437B 0.17422  
 402B -> 437B -0.15515  
 405B -> 437B 0.15779  
 406B -> 437B 0.51647  
 406B -> 438B -0.20874  
 407B -> 437B -0.13922  
 409B -> 438B 0.12066

Excited State 165: 1.000-A 2.9120 eV 425.76 nm f=0.0006 <S\*\*2>=0.000

429A -> 439A 0.11779  
 431A -> 439A 0.10218  
 432A -> 439A 0.68090  
 429B -> 439B 0.11779  
 431B -> 439B 0.10218  
 432B -> 439B 0.68090

Excited State 166: 3.000-A 2.9124 eV 425.72 nm f=0.0000 <S\*\*2>=2.000

392A -> 439A -0.37499  
 406A -> 437A 0.13258  
 408A -> 439A 0.11160  
 432A -> 439A 0.47485  
 392B -> 439B 0.37499  
 406B -> 437B -0.13258  
 408B -> 439B -0.11160  
 432B -> 439B -0.47485

Excited State 167: 3.000-A 2.9171 eV 425.03 nm f=0.0000 <S\*\*2>=2.000

400A -> 438A 0.20781



|              |          |
|--------------|----------|
| 401A -> 438A | -0.19596 |
| 403A -> 438A | 0.14103  |
| 404A -> 438A | -0.22100 |
| 405A -> 438A | 0.23745  |
| 406A -> 438A | 0.27520  |
| 408A -> 437A | 0.15217  |
| 408A -> 438A | 0.10056  |
| 409A -> 438A | 0.29755  |
| 411A -> 438A | -0.14329 |
| 400B -> 438B | -0.20781 |
| 401B -> 438B | 0.19596  |
| 403B -> 438B | -0.14103 |
| 404B -> 438B | 0.22100  |
| 405B -> 438B | -0.23745 |
| 406B -> 438B | -0.27520 |
| 408B -> 437B | -0.15217 |
| 408B -> 438B | -0.10056 |
| 409B -> 438B | -0.29755 |
| 411B -> 438B | 0.14329  |

Excited State 168: 1.000-A 2.9172 eV 425.01 nm f=0.0020 <S\*\*2>=0.000

|              |          |
|--------------|----------|
| 398A -> 437A | -0.18689 |
| 399A -> 437A | -0.13644 |
| 400A -> 437A | 0.31570  |
| 402A -> 437A | -0.23636 |
| 404A -> 437A | 0.26637  |
| 405A -> 437A | -0.21951 |
| 407A -> 437A | 0.18145  |
| 408A -> 437A | 0.28234  |
| 409A -> 437A | 0.10234  |
| 398B -> 437B | -0.18689 |
| 399B -> 437B | -0.13644 |
| 400B -> 437B | 0.31570  |
| 402B -> 437B | -0.23636 |
| 404B -> 437B | 0.26637  |
| 405B -> 437B | -0.21951 |

407B -> 437B 0.18145  
408B -> 437B 0.28234  
409B -> 437B 0.10234

Excited State 169: 3.000-A 2.9192 eV 424.72 nm f=0.0000 <S\*\*2>=2.000

401A -> 437A -0.15354  
404A -> 437A 0.13737  
405A -> 437A -0.11337  
406A -> 437A 0.38149  
408A -> 437A 0.38859  
409A -> 437A 0.10732  
409A -> 438A -0.13876  
401B -> 437B 0.15354  
404B -> 437B -0.13737  
405B -> 437B 0.11337  
406B -> 437B -0.38149  
408B -> 437B -0.38859  
409B -> 437B -0.10732  
409B -> 438B 0.13876

Excited State 170: 1.000-A 2.9214 eV 424.40 nm f=0.0127 <S\*\*2>=0.000

395A -> 437A 0.20975  
397A -> 438A 0.15878  
399A -> 438A 0.17913  
400A -> 437A -0.21895  
401A -> 438A -0.12133  
404A -> 438A -0.14538  
405A -> 438A 0.20058  
406A -> 437A -0.13210  
409A -> 438A 0.17535  
435A -> 444A 0.10075  
436A -> 441A 0.27253  
436A -> 443A 0.18482  
395B -> 437B 0.20975  
397B -> 438B 0.15878  
399B -> 438B 0.17913

400B -> 437B -0.21895  
401B -> 438B -0.12133  
404B -> 438B -0.14538  
405B -> 438B 0.20058  
406B -> 437B -0.13210  
409B -> 438B 0.17535  
435B -> 444B 0.10075  
436B -> 441B 0.27253  
436B -> 443B 0.18482

Excited State 171: 1.000-A 2.9234 eV 424.11 nm f=0.0217 <S\*\*2>=0.000

395A -> 437A 0.20866  
397A -> 438A -0.13098  
399A -> 438A -0.15137  
400A -> 437A -0.23174  
400A -> 438A -0.10860  
401A -> 438A 0.16866  
403A -> 438A -0.11287  
404A -> 438A 0.15796  
405A -> 438A -0.20757  
406A -> 438A -0.12201  
408A -> 438A -0.10622  
409A -> 438A -0.19743  
436A -> 441A 0.26833  
395B -> 437B 0.20866  
397B -> 438B -0.13098  
399B -> 438B -0.15137  
400B -> 437B -0.23174  
400B -> 438B -0.10860  
401B -> 438B 0.16866  
403B -> 438B -0.11287  
404B -> 438B 0.15796  
405B -> 438B -0.20757  
406B -> 438B -0.12201  
408B -> 438B -0.10622  
409B -> 438B -0.19743

436B -> 441B 0.26833

Excited State 172: 3.000-A 2.9235 eV 424.09 nm f=0.0000 <S\*\*2>=2.000

406A -> 437A -0.10701

408A -> 437A -0.17888

431A -> 442A 0.10516

432A -> 439A -0.10086

433A -> 448A 0.10331

434A -> 446A -0.11207

435A -> 445A -0.12350

436A -> 442A 0.14912

436A -> 446A -0.20313

436A -> 448A 0.12969

436A -> 449A -0.11503

406B -> 437B 0.10701

408B -> 437B 0.17888

431B -> 442B -0.10516

432B -> 439B 0.10086

433B -> 448B -0.10331

434B -> 446B 0.11207

435B -> 445B 0.12350

436B -> 442B -0.14912

436B -> 446B 0.20313

436B -> 448B -0.12969

436B -> 449B 0.11503

Excited State 173: 1.000-A 2.9242 eV 424.00 nm f=0.0044 <S\*\*2>=0.000

395A -> 437A -0.12424

400A -> 437A -0.20336

401A -> 437A -0.29332

402A -> 437A 0.26485

406A -> 437A 0.28801

408A -> 437A 0.36038

395B -> 437B -0.12424

400B -> 437B -0.20336

401B -> 437B -0.29332

402B -> 437B 0.26485  
406B -> 437B 0.28801  
408B -> 437B 0.36038

Excited State 174: 3.000-A 2.9264 eV 423.67 nm f=0.0000 <S\*\*2>=2.000

398A -> 438A -0.21817  
405A -> 438A -0.11401  
406A -> 438A -0.39732  
407A -> 438A -0.14818  
409A -> 438A 0.43671  
398B -> 438B 0.21817  
405B -> 438B 0.11401  
406B -> 438B 0.39732  
407B -> 438B 0.14818  
409B -> 438B -0.43671

Excited State 175: 1.000-A 2.9416 eV 421.49 nm f=0.0205 <S\*\*2>=0.000

397A -> 438A 0.15935  
398A -> 438A -0.17251  
399A -> 438A 0.34305  
400A -> 438A -0.24781  
401A -> 438A 0.13708  
403A -> 438A -0.15596  
404A -> 438A 0.11714  
406A -> 438A -0.24468  
407A -> 438A -0.24677  
408A -> 438A -0.10289  
435A -> 444A 0.14136  
436A -> 444A 0.12587  
397B -> 438B 0.15935  
398B -> 438B -0.17251  
399B -> 438B 0.34305  
400B -> 438B -0.24781  
401B -> 438B 0.13708  
403B -> 438B -0.15596  
404B -> 438B 0.11714

406B -> 438B -0.24468  
407B -> 438B -0.24677  
408B -> 438B -0.10289  
435B -> 444B 0.14136  
436B -> 444B 0.12587

Excited State 176: 3.000-A 2.9576 eV 419.21 nm f=0.0000 <S\*\*2>=2.000

391A -> 438A -0.10102  
394A -> 438A -0.10864  
397A -> 438A -0.11433  
398A -> 438A 0.20967  
399A -> 438A 0.30507  
402A -> 438A -0.28485  
403A -> 438A -0.23374  
404A -> 438A 0.10985  
405A -> 438A 0.15597  
406A -> 438A -0.16176  
407A -> 438A -0.21841  
408A -> 438A -0.15792  
412A -> 438A 0.10292  
391B -> 438B 0.10102  
394B -> 438B 0.10864  
397B -> 438B 0.11433  
398B -> 438B -0.20967  
399B -> 438B -0.30507  
402B -> 438B 0.28485  
403B -> 438B 0.23374  
404B -> 438B -0.10985  
405B -> 438B -0.15597  
406B -> 438B 0.16176  
407B -> 438B 0.21841  
408B -> 438B 0.15792  
412B -> 438B -0.10292

Excited State 177: 1.000-A 2.9593 eV 418.96 nm f=0.0113 <S\*\*2>=0.000

431A -> 439A -0.10052

436A -> 442A 0.60757  
436A -> 443A -0.20041  
431B -> 439B -0.10052  
436B -> 442B 0.60757  
436B -> 443B -0.20041

Excited State 178: 1.000-A 2.9647 eV 418.21 nm f=0.0061 <S\*\*2>=0.000

397A -> 438A 0.36857  
398A -> 438A 0.16539  
399A -> 438A -0.10014  
401A -> 438A 0.13484  
403A -> 438A -0.21314  
404A -> 438A -0.11512  
405A -> 438A 0.14144  
407A -> 438A 0.31095  
409A -> 438A -0.23979  
397B -> 438B 0.36857  
398B -> 438B 0.16539  
399B -> 438B -0.10014  
401B -> 438B 0.13484  
403B -> 438B -0.21314  
404B -> 438B -0.11512  
405B -> 438B 0.14144  
407B -> 438B 0.31095  
409B -> 438B -0.23979

Excited State 179: 3.000-A 2.9661 eV 418.00 nm f=0.0000 <S\*\*2>=2.000

392A -> 439A -0.20362  
431A -> 439A 0.58894  
432A -> 439A -0.13147  
433A -> 439A 0.17511  
434A -> 439A 0.10613  
392B -> 439B 0.20362  
431B -> 439B -0.58894  
432B -> 439B 0.13147  
433B -> 439B -0.17511

434B -> 439B -0.10613

Excited State 180: 1.000-A 2.9732 eV 417.00 nm f=0.0002 <S\*\*2>=0.000

431A -> 439A 0.65179

433A -> 439A 0.18496

434A -> 439A 0.10767

436A -> 442A 0.10053

431B -> 439B 0.65179

433B -> 439B 0.18496

434B -> 439B 0.10767

436B -> 442B 0.10053

Excited State 181: 3.000-A 2.9827 eV 415.68 nm f=0.0000 <S\*\*2>=2.000

393A -> 440A -0.15775

430A -> 440A 0.61962

432A -> 440A 0.10983

433A -> 440A -0.13610

434A -> 440A 0.13620

393B -> 440B 0.15775

430B -> 440B -0.61962

432B -> 440B -0.10983

433B -> 440B 0.13610

434B -> 440B -0.13620

Excited State 182: 1.000-A 2.9876 eV 415.00 nm f=0.0130 <S\*\*2>=0.000

395A -> 437A -0.11749

403A -> 438A 0.10140

404A -> 438A -0.10799

405A -> 438A -0.14546

430A -> 440A 0.42549

435A -> 441A 0.22355

435A -> 442A -0.15083

436A -> 441A 0.24110

436A -> 443A -0.15733

436A -> 444A 0.11732

395B -> 437B -0.11749



|              |          |
|--------------|----------|
| 403B -> 438B | 0.10140  |
| 404B -> 438B | -0.10799 |
| 405B -> 438B | -0.14546 |
| 430B -> 440B | 0.42549  |
| 435B -> 441B | 0.22355  |
| 435B -> 442B | -0.15083 |
| 436B -> 441B | 0.24110  |
| 436B -> 443B | -0.15733 |
| 436B -> 444B | 0.11732  |

Excited State 183: 1.000-A 2.9900 eV 414.66 nm f=0.0001 <S\*\*2>=0.000

|              |          |
|--------------|----------|
| 397A -> 438A | -0.11461 |
| 398A -> 438A | 0.21172  |
| 401A -> 438A | -0.17871 |
| 402A -> 438A | -0.15980 |
| 403A -> 438A | -0.30496 |
| 404A -> 438A | 0.18544  |
| 405A -> 438A | 0.31082  |
| 407A -> 438A | -0.14231 |
| 430A -> 440A | 0.25779  |
| 397B -> 438B | -0.11461 |
| 398B -> 438B | 0.21172  |
| 401B -> 438B | -0.17871 |
| 402B -> 438B | -0.15980 |
| 403B -> 438B | -0.30496 |
| 404B -> 438B | 0.18544  |
| 405B -> 438B | 0.31082  |
| 407B -> 438B | -0.14231 |
| 430B -> 440B | 0.25779  |

Excited State 184: 1.000-A 2.9949 eV 413.98 nm f=0.0129 <S\*\*2>=0.000

|              |          |
|--------------|----------|
| 395A -> 437A | 0.12972  |
| 430A -> 440A | 0.44361  |
| 435A -> 441A | -0.23714 |
| 435A -> 442A | 0.16375  |
| 436A -> 441A | -0.28566 |

|              |          |
|--------------|----------|
| 436A -> 442A | 0.12724  |
| 436A -> 443A | 0.19272  |
| 395B -> 437B | 0.12972  |
| 430B -> 440B | 0.44361  |
| 435B -> 441B | -0.23714 |
| 435B -> 442B | 0.16375  |
| 436B -> 441B | -0.28566 |
| 436B -> 442B | 0.12724  |
| 436B -> 443B | 0.19272  |

Excited State 185: 3.000-A 2.9959 eV 413.85 nm f=0.0000 <S\*\*2>=2.000

|              |          |
|--------------|----------|
| 399A -> 438A | 0.17655  |
| 401A -> 438A | 0.25494  |
| 402A -> 438A | -0.25342 |
| 403A -> 438A | 0.25973  |
| 405A -> 438A | 0.17042  |
| 407A -> 438A | 0.45445  |
| 408A -> 438A | -0.14638 |
| 399B -> 438B | -0.17655 |
| 401B -> 438B | -0.25494 |
| 402B -> 438B | 0.25342  |
| 403B -> 438B | -0.25973 |
| 405B -> 438B | -0.17042 |
| 407B -> 438B | -0.45445 |
| 408B -> 438B | 0.14638  |

Excited State 186: 3.000-A 2.9970 eV 413.70 nm f=0.0000 <S\*\*2>=2.000

|              |          |
|--------------|----------|
| 399A -> 438A | -0.14112 |
| 402A -> 438A | 0.10135  |
| 403A -> 438A | 0.17090  |
| 404A -> 438A | 0.51717  |
| 405A -> 438A | 0.37993  |
| 399B -> 438B | 0.14112  |
| 402B -> 438B | -0.10135 |
| 403B -> 438B | -0.17090 |
| 404B -> 438B | -0.51717 |

405B -> 438B -0.37993

Excited State 187: 1.000-A 2.9999 eV 413.30 nm f=0.0003 <S\*\*2>=0.000

401A -> 438A 0.15834

403A -> 438A 0.34048

404A -> 438A 0.39412

405A -> 438A 0.34249

407A -> 438A 0.23485

401B -> 438B 0.15834

403B -> 438B 0.34048

404B -> 438B 0.39412

405B -> 438B 0.34249

407B -> 438B 0.23485

Excited State 188: 1.000-A 3.0071 eV 412.31 nm f=0.0006 <S\*\*2>=0.000

397A -> 438A -0.24325

399A -> 438A 0.34806

401A -> 438A 0.13214

402A -> 438A -0.34220

404A -> 438A -0.27758

407A -> 438A 0.27116

408A -> 438A -0.12236

397B -> 438B -0.24325

399B -> 438B 0.34806

401B -> 438B 0.13214

402B -> 438B -0.34220

404B -> 438B -0.27758

407B -> 438B 0.27116

408B -> 438B -0.12236

Excited State 189: 3.000-A 3.0099 eV 411.92 nm f=0.0000 <S\*\*2>=2.000

398A -> 437A -0.36096

399A -> 437A -0.17969

402A -> 437A 0.43586

403A -> 437A 0.11044

404A -> 437A -0.18603

405A -> 437A 0.19481  
398B -> 437B 0.36096  
399B -> 437B 0.17969  
402B -> 437B -0.43586  
403B -> 437B -0.11044  
404B -> 437B 0.18603  
405B -> 437B -0.19481

Excited State 190: 3.000-A 3.0248 eV 409.90 nm f=0.0000 <S\*\*2>=2.000

435A -> 442A -0.14346  
435A -> 443A -0.11016  
436A -> 441A -0.39806  
436A -> 442A 0.37631  
436A -> 443A 0.25600  
436A -> 444A -0.12278  
435B -> 442B 0.14346  
435B -> 443B 0.11016  
436B -> 441B 0.39806  
436B -> 442B -0.37631  
436B -> 443B -0.25600  
436B -> 444B 0.12278

Excited State 191: 3.000-A 3.0304 eV 409.13 nm f=0.0000 <S\*\*2>=2.000

399A -> 437A -0.13279  
431A -> 441A 0.13880  
433A -> 441A 0.15676  
433A -> 443A 0.17945  
434A -> 441A 0.17876  
434A -> 443A 0.24295  
435A -> 441A 0.18342  
435A -> 442A 0.13130  
436A -> 441A 0.18981  
436A -> 442A 0.18322  
436A -> 448A 0.13568  
399B -> 437B 0.13279  
431B -> 441B -0.13880

433B -> 441B -0.15676  
 433B -> 443B -0.17945  
 434B -> 441B -0.17876  
 434B -> 443B -0.24295  
 435B -> 441B -0.18342  
 435B -> 442B -0.13130  
 436B -> 441B -0.18981  
 436B -> 442B -0.18322  
 436B -> 448B -0.13568

Excited State 192: 1.000-A 3.0310 eV 409.05 nm f=0.0007 <S\*\*2>=0.000

398A -> 437A 0.42752  
 399A -> 437A 0.33810  
 402A -> 437A -0.34805  
 404A -> 437A 0.13782  
 405A -> 437A -0.14871  
 398B -> 437B 0.42752  
 399B -> 437B 0.33810  
 402B -> 437B -0.34805  
 404B -> 437B 0.13782  
 405B -> 437B -0.14871

Excited State 193: 3.000-A 3.0380 eV 408.11 nm f=0.0000 <S\*\*2>=2.000

398A -> 438A 0.28352  
 400A -> 438A -0.35010  
 403A -> 438A 0.42643  
 405A -> 438A -0.19583  
 407A -> 438A -0.15888  
 398B -> 438B -0.28352  
 400B -> 438B 0.35010  
 403B -> 438B -0.42643  
 405B -> 438B 0.19583  
 407B -> 438B 0.15888

Excited State 194: 1.000-A 3.0436 eV 407.37 nm f=0.0000 <S\*\*2>=0.000

415A -> 440A 0.46655

416A -> 440A 0.45116  
417A -> 440A -0.11436  
418A -> 440A -0.13843  
429A -> 440A 0.10135  
415B -> 440B 0.46655  
416B -> 440B 0.45116  
417B -> 440B -0.11436  
418B -> 440B -0.13843  
429B -> 440B 0.10135

Excited State 195: 1.000-A 3.0468 eV 406.93 nm f=0.0000 <S\*\*2>=0.000

410A -> 439A 0.13211  
413A -> 439A 0.19343  
414A -> 439A 0.62151  
415A -> 439A 0.12009  
416A -> 439A -0.12750  
410B -> 439B 0.13211  
413B -> 439B 0.19343  
414B -> 439B 0.62151  
415B -> 439B 0.12009  
416B -> 439B -0.12750

Excited State 196: 1.000-A 3.0553 eV 405.81 nm f=0.0012 <S\*\*2>=0.000

398A -> 438A -0.37547  
400A -> 438A 0.43038  
401A -> 438A 0.12797  
402A -> 438A 0.13735  
403A -> 438A -0.27772  
407A -> 438A 0.13234  
398B -> 438B -0.37547  
400B -> 438B 0.43038  
401B -> 438B 0.12797  
402B -> 438B 0.13735  
403B -> 438B -0.27772  
407B -> 438B 0.13234

Excited State 197: 1.000-A 3.0576 eV 405.49 nm f=0.0091 <S\*\*2>=0.000

395A -> 437A -0.11437  
435A -> 441A -0.35411  
435A -> 442A 0.38765  
435A -> 443A 0.11020  
436A -> 441A 0.24168  
436A -> 442A -0.16751  
436A -> 443A -0.27394  
395B -> 437B -0.11437  
435B -> 441B -0.35411  
435B -> 442B 0.38765  
435B -> 443B 0.11020  
436B -> 441B 0.24168  
436B -> 442B -0.16751  
436B -> 443B -0.27394

Excited State 198: 3.000-A 3.0622 eV 404.89 nm f=0.0000 <S\*\*2>=2.000

396A -> 437A 0.16973  
398A -> 437A -0.27809  
399A -> 437A 0.47125  
435A -> 441A 0.12942  
435A -> 442A 0.20975  
436A -> 441A 0.10003  
436A -> 442A 0.13056  
396B -> 437B -0.16973  
398B -> 437B 0.27809  
399B -> 437B -0.47125  
435B -> 441B -0.12942  
435B -> 442B -0.20975  
436B -> 441B -0.10003  
436B -> 442B -0.13056

Excited State 199: 3.000-A 3.0659 eV 404.40 nm f=0.0000 <S\*\*2>=2.000

398A -> 437A -0.21625  
399A -> 437A 0.27433  
435A -> 441A -0.16125

435A -> 442A -0.29636  
 435A -> 443A 0.17573  
 435A -> 447A -0.11146  
 436A -> 442A -0.17529  
 436A -> 443A 0.13043  
 436A -> 448A 0.11336  
 398B -> 437B 0.21625  
 399B -> 437B -0.27433  
 435B -> 441B 0.16125  
 435B -> 442B 0.29636  
 435B -> 443B -0.17573  
 435B -> 447B 0.11146  
 436B -> 442B 0.17529  
 436B -> 443B -0.13043  
 436B -> 448B -0.11336

Excited State 200: 1.000-A 3.0705 eV 403.79 nm f=0.0034 <S\*\*2>=0.000

396A -> 437A 0.12369  
 398A -> 437A -0.42557  
 399A -> 437A 0.51611  
 411A -> 437A -0.10239  
 396B -> 437B 0.12369  
 398B -> 437B -0.42557  
 399B -> 437B 0.51611  
 411B -> 437B -0.10239

**Table S12.** Standard orientation of the optimized geometry for the open-ring isomer (OF5) of **[Ir( $\mu$ -Cl)(PIC)<sub>2</sub>]<sub>2</sub>**.

| Symbol | Coordinates |           |          |   |          |           |           |
|--------|-------------|-----------|----------|---|----------|-----------|-----------|
|        | X           | Y         | Z        |   |          |           |           |
| Ir     | -0.080562   | -2.403347 | 0.080187 | C | 5.612086 | -1.191721 | -0.071472 |
| N      | 4.165477    | -3.581871 | 0.047636 | C | 6.60822  | -0.946124 | -0.96958  |
| C      | 3.172356    | -2.821134 | 0.663452 | C | 8.009099 | -1.15425  | -0.63746  |
| C      | 3.480636    | -2.187521 | 1.910945 | C | 8.282241 | -1.707211 | 0.690143  |
| C      | 4.861924    | -1.874248 | 2.237732 | C | 7.276247 | -1.937422 | 1.58361   |
| C      | 5.890941    | -1.702504 | 1.248314 | O | 8.945545 | -0.834881 | -1.434239 |
|        |             |           |          | C | 2.502116 | -2.072476 | 2.934083  |
|        |             |           |          | C | 2.854306 | -1.778631 | 4.236228  |
|        |             |           |          | C | 4.210542 | -1.570622 | 4.581536  |



|   |           |           |           |    |           |           |           |
|---|-----------|-----------|-----------|----|-----------|-----------|-----------|
| C | 5.185155  | -1.630217 | 3.607897  | Cl | 0.404413  | -0.179703 | 1.584913  |
| C | 3.599039  | -4.220789 | -0.984426 | Cl | 0.120836  | -0.336259 | -1.633429 |
| C | 2.200912  | -3.840358 | -1.048451 | Ir | 0.212394  | 1.906814  | -0.080021 |
| N | 1.952553  | -2.978957 | 0.001199  | N  | -4.36379  | -2.026104 | 0.067715  |
| C | 4.386001  | -5.187399 | -1.764851 | C  | -3.17892  | -1.788463 | -0.604419 |
| C | 1.082648  | -4.235942 | -1.846333 | C  | -3.500457 | -1.440756 | -1.988706 |
| C | 1.159847  | -5.013917 | -3.027646 | C  | -4.911471 | -1.479067 | -2.11079  |
| C | -0.000755 | -5.455025 | -3.646705 | C  | -5.586941 | -1.786599 | -0.753265 |
| C | -1.253126 | -5.134703 | -3.087105 | C  | -6.439936 | -3.032528 | -0.842933 |
| C | -1.344178 | -4.322237 | -1.956124 | C  | -7.774303 | -3.010144 | -0.686774 |
| C | -0.190036 | -3.800241 | -1.336855 | C  | -8.500359 | -1.772599 | -0.336561 |
| C | 5.706655  | -4.85259  | -2.128622 | C  | -7.687105 | -0.556187 | -0.152014 |
| C | 6.507637  | -5.765923 | -2.81697  | C  | -6.350087 | -0.555651 | -0.300691 |
| C | 6.010524  | -7.034314 | -3.142113 | O  | -9.745005 | -1.761437 | -0.196317 |
| C | 4.708164  | -7.385867 | -2.766693 | C  | -2.718033 | -1.211278 | -3.125671 |
| C | 3.901388  | -6.472383 | -2.082872 | C  | -3.358817 | -1.007559 | -4.354874 |
| N | 4.579633  | 2.165567  | 0.436823  | C  | -4.754942 | -1.038147 | -4.463414 |
| C | 3.535875  | 1.904878  | -0.444751 | C  | -5.545585 | -1.275993 | -3.329039 |
| C | 3.8659    | 1.617652  | -1.815741 | C  | -4.104362 | -2.669555 | 1.278442  |
| C | 5.179081  | 1.990251  | -2.291733 | C  | -2.717706 | -2.779556 | 1.330942  |
| C | 6.00473   | 2.980281  | -1.636367 | N  | -2.156616 | -2.199936 | 0.168204  |
| C | 5.454797  | 4.238596  | -1.183496 | C  | -5.174714 | -3.186032 | 2.155997  |
| C | 6.253093  | 5.24335   | -0.72754  | C  | -1.784561 | -3.513252 | 2.173057  |
| C | 7.702596  | 5.079537  | -0.639156 | C  | -2.124419 | -4.148873 | 3.380364  |
| C | 8.246057  | 3.797955  | -1.102163 | C  | -1.207124 | -4.991652 | 4.011702  |
| C | 7.43891   | 2.819582  | -1.604452 | C  | 0.044597  | -5.216502 | 3.425867  |
| O | 8.457606  | 5.996026  | -0.203013 | C  | 0.403919  | -4.551737 | 2.246008  |
| C | 3.018686  | 0.891646  | -2.684323 | C  | -0.474203 | -3.647751 | 1.62215   |
| C | 3.474946  | 0.435679  | -3.910118 | C  | -6.100047 | -2.319528 | 2.766509  |
| C | 4.801143  | 0.69032   | -4.325605 | C  | -7.137187 | -2.830732 | 3.553309  |
| C | 5.639509  | 1.442994  | -3.521896 | C  | -7.259115 | -4.210836 | 3.749795  |
| C | 4.045742  | 2.665309  | 1.563871  | C  | -6.336969 | -5.081082 | 3.155113  |
| C | 2.608842  | 2.664627  | 1.416969  | C  | -5.305238 | -4.574788 | 2.360654  |
| N | 2.309648  | 2.103549  | 0.182309  | N  | -4.179396 | 2.202514  | -0.58838  |
| C | 4.923733  | 3.05822   | 2.68088   | C  | -3.129958 | 1.899549  | 0.278865  |
| C | 1.507949  | 3.207744  | 2.157541  | C  | -3.452779 | 1.58855   | 1.647005  |
| C | 1.587852  | 3.81059   | 3.434622  | C  | -2.630391 | 0.767949  | 2.451439  |
| C | 0.492186  | 4.488451  | 3.954117  | C  | -3.062681 | 0.304916  | 3.682475  |
| C | -0.691628 | 4.588617  | 3.199266  | C  | -4.344975 | 0.647323  | 4.165954  |
| C | -0.801413 | 3.945744  | 1.964887  | C  | -5.156549 | 1.489201  | 3.425957  |
| C | 0.262824  | 3.190859  | 1.44255   | C  | -3.639394 | 2.707051  | -1.710872 |
| C | 5.964325  | 2.192077  | 3.07029   | C  | -2.199328 | 2.656732  | -1.57982  |
| C | 6.856866  | 2.560721  | 4.078897  | N  | -1.903188 | 2.077951  | -0.351803 |
| C | 6.73607   | 3.806024  | 4.708238  | C  | -4.506353 | 3.220561  | -2.78639  |
| C | 5.721563  | 4.684881  | 4.312507  | C  | -1.101068 | 3.175027  | -2.334392 |
| C | 4.824323  | 4.316978  | 3.305309  | C  | -1.187435 | 3.755218  | -3.624325 |

|   |           |           |           |   |           |           |           |
|---|-----------|-----------|-----------|---|-----------|-----------|-----------|
| C | -0.092192 | 4.413414  | -4.163574 | H | -5.910764 | -3.949486 | -1.084971 |
| C | 1.099555  | 4.519107  | -3.417018 | H | -8.376256 | -3.906266 | -0.790703 |
| C | 1.217012  | 3.897695  | -2.17476  | H | -8.226712 | 0.346885  | 0.11322   |
| C | 0.152149  | 3.153966  | -1.627875 | H | -5.759227 | 0.35068   | -0.188033 |
| C | -5.621604 | 2.468715  | -3.202978 | H | -1.641932 | -1.17884  | -3.052727 |
| C | -6.501914 | 2.971987  | -4.163202 | H | -2.755561 | -0.827202 | -5.238145 |
| C | -6.294761 | 4.242428  | -4.714237 | H | -5.228419 | -0.882633 | -5.42684  |
| C | -5.203351 | 5.009448  | -4.29072  | H | -6.627399 | -1.31664  | -3.404429 |
| C | -4.317558 | 4.50567   | -3.334224 | H | -3.105288 | -3.999608 | 3.816551  |
| H | 4.589461  | -0.947789 | -0.32501  | H | -1.474494 | -5.483378 | 4.94165   |
| H | 6.391601  | -0.531399 | -1.944883 | H | 0.747949  | -5.900958 | 3.89123   |
| H | 9.317854  | -1.920948 | 0.931171  | H | 1.385025  | -4.728816 | 1.821781  |
| H | 7.510892  | -2.368965 | 2.550074  | H | -6.000875 | -1.249497 | 2.628938  |
| H | 1.476059  | -2.292772 | 2.698202  | H | -7.847758 | -2.151814 | 4.013631  |
| H | 2.086259  | -1.731814 | 5.000218  | H | -8.064916 | -4.605075 | 4.360373  |
| H | 4.480659  | -1.339922 | 5.60659   | H | -6.425926 | -6.152555 | 3.302604  |
| H | 6.210075  | -1.399546 | 3.870905  | H | -4.59483  | -5.250075 | 1.895385  |
| H | 2.125933  | -5.262257 | -3.448289 | H | -1.671841 | 0.450065  | 2.073276  |
| H | 0.056304  | -6.05071  | -4.551677 | H | -2.418277 | -0.349959 | 4.25862   |
| H | -2.160598 | -5.508801 | -3.552683 | H | -4.681657 | 0.276493  | 5.128372  |
| H | -2.322972 | -4.078458 | -1.565686 | H | -6.103361 | 1.819469  | 3.838372  |
| H | 6.087582  | -3.871637 | -1.867752 | H | -2.10662  | 3.681561  | -4.190476 |
| H | 7.51837   | -5.488507 | -3.098559 | H | -0.155706 | 4.855802  | -5.152145 |
| H | 6.633923  | -7.744108 | -3.676578 | H | 1.941054  | 5.072064  | -3.824229 |
| H | 4.324     | -8.374903 | -2.995635 | H | 2.150819  | 3.963779  | -1.633168 |
| H | 2.904775  | -6.763729 | -1.770278 | H | -5.786502 | 1.490354  | -2.769662 |
| H | 4.384113  | 4.387044  | -1.263011 | H | -7.352859 | 2.375894  | -4.477619 |
| H | 5.84818   | 6.202768  | -0.426604 | H | -6.982893 | 4.635447  | -5.455612 |
| H | 9.31884   | 3.663417  | -1.019641 | H | -5.049714 | 6.005974  | -4.692047 |
| H | 7.865277  | 1.871721  | -1.918173 | H | -3.495188 | 5.121822  | -2.988442 |
| H | 2.028313  | 0.623363  | -2.354408 | C | -4.714408 | 2.045971  | 2.191438  |
| H | 2.811248  | -0.148318 | -4.538662 | C | -5.481911 | 3.134898  | 1.625849  |
| H | 5.154521  | 0.319359  | -5.281761 | C | -6.920357 | 3.131213  | 1.720212  |
| H | 6.635831  | 1.696387  | -3.866381 | C | -4.855007 | 4.327808  | 1.111553  |
| H | 2.501241  | 3.740245  | 4.010175  | C | -7.669751 | 4.181978  | 1.274607  |
| H | 0.553839  | 4.949746  | 4.934172  | H | -7.410366 | 2.241105  | 2.101105  |
| H | -1.533302 | 5.153997  | 3.588754  | C | -5.585182 | 5.406122  | 0.706262  |
| H | -1.72864  | 4.007505  | 1.412496  | H | -3.773306 | 4.373992  | 1.097924  |
| H | 6.064055  | 1.237214  | 2.567867  | H | -8.753831 | 4.159867  | 1.294943  |
| H | 7.651545  | 1.880682  | 4.369507  | H | -5.109733 | 6.315888  | 0.357993  |
| H | 7.433413  | 4.093863  | 5.488379  | C | -7.044105 | 5.394223  | 0.740221  |
| H | 5.63809   | 5.663323  | 4.774675  | O | -7.738963 | 6.378863  | 0.350997  |
| H | 4.066063  | 5.020376  | 2.97955   |   |           |           |           |

Excited State 1: 3.000-A -0.5846 eV -2120.87 nm f=-0.0000 <S\*\*2>=2.000

431A -> 437A -0.17750  
 434A -> 437A 0.39989  
 434A -> 438A -0.19832  
 435A -> 437A 0.47986  
 436A -> 437A 0.18638  
 431B -> 437B 0.17750  
 434B -> 437B -0.39989  
 434B -> 438B 0.19832  
 435B -> 437B -0.47986  
 436B -> 437B -0.18638

This state for optimization and/or second-order correction.

Total Energy, E(TD-HF/TD-DFT) = -6023.94357822

Copying the excited state density for this state as the 1-particle RhoCI density.

Excited State 2: 3.000-A -0.5782 eV -2144.49 nm f=-0.0000 <S\*\*2>=2.000

433A -> 439A -0.33505  
 435A -> 439A 0.23198  
 436A -> 439A -0.56531  
 433B -> 439B 0.33505  
 435B -> 439B -0.23198  
 436B -> 439B 0.56531

Excited State 3: 3.000-A -0.5675 eV -2184.84 nm f=-0.0000 <S\*\*2>=2.000

431A -> 438A 0.11311  
 434A -> 437A 0.23894  
 434A -> 438A 0.34570  
 435A -> 438A -0.47825  
 436A -> 438A -0.23708  
 431B -> 438B -0.11311  
 434B -> 437B -0.23894  
 434B -> 438B -0.34570  
 435B -> 438B 0.47825  
 436B -> 438B 0.23708

Excited State 4: 3.000-A 0.5273 eV 2351.37 nm f=0.0000 <S\*\*2>=2.000

431A -> 437A 0.12821

434A -> 437A -0.16301  
436A -> 437A 0.65544  
431B -> 437B -0.12821  
434B -> 437B 0.16301  
436B -> 437B -0.65544

Excited State 5: 1.000-A 0.5497 eV 2255.36 nm f=0.0025 <S\*\*2>=0.000

435A -> 437A -0.18838  
436A -> 437A 0.67338  
435B -> 437B -0.18838  
436B -> 437B 0.67338

Excited State 6: 3.000-A 0.6141 eV 2018.80 nm f=0.0000 <S\*\*2>=2.000

431A -> 437A 0.17241  
431A -> 438A -0.11855  
434A -> 437A -0.32404  
435A -> 437A 0.38063  
436A -> 437A -0.12482  
436A -> 438A -0.43164  
431B -> 437B -0.17241  
431B -> 438B 0.11855  
434B -> 437B 0.32404  
435B -> 437B -0.38063  
436B -> 437B 0.12482  
436B -> 438B 0.43164

Excited State 7: 1.000-A 0.6577 eV 1885.01 nm f=0.0035 <S\*\*2>=0.000

435A -> 438A -0.18378  
436A -> 438A 0.65990  
435B -> 438B -0.18378  
436B -> 438B 0.65990

Excited State 8: 3.000-A 0.6677 eV 1856.86 nm f=0.0000 <S\*\*2>=2.000

431A -> 437A -0.12582  
434A -> 437A 0.21026  
434A -> 438A -0.10343

435A -> 437A -0.27660  
 435A -> 438A 0.31367  
 436A -> 438A -0.48647  
 431B -> 437B 0.12582  
 434B -> 437B -0.21026  
 434B -> 438B 0.10343  
 435B -> 437B 0.27660  
 435B -> 438B -0.31367  
 436B -> 438B 0.48647

Excited State 9: 1.000-A 0.7271 eV 1705.08 nm f=0.0433 <S\*\*2>=0.000

434A -> 437A -0.30367  
 435A -> 437A 0.58261  
 435A -> 438A -0.18118  
 436A -> 437A 0.14585  
 434B -> 437B -0.30367  
 435B -> 437B 0.58261  
 435B -> 438B -0.18118  
 436B -> 437B 0.14585

Excited State 10: 3.000-A 0.7540 eV 1644.39 nm f=0.0000 <S\*\*2>=2.000

430A -> 439A 0.14707  
 433A -> 439A -0.47890  
 435A -> 439A 0.25984  
 436A -> 439A 0.41107  
 430B -> 439B -0.14707  
 433B -> 439B 0.47890  
 435B -> 439B -0.25984  
 436B -> 439B -0.41107

Excited State 11: 1.000-A 0.7844 eV 1580.68 nm f=0.0017 <S\*\*2>=0.000

434A -> 439A -0.12293  
 435A -> 438A 0.13458  
 435A -> 439A 0.54334  
 436A -> 439A 0.40519  
 434B -> 439B -0.12293

435B -> 438B 0.13458  
435B -> 439B 0.54334  
436B -> 439B 0.40519

Excited State 12: 3.000-A 0.8058 eV 1538.73 nm  $f=0.0000$   $\langle S^{*2} \rangle = 2.000$

431A -> 438A 0.13720  
433A -> 439A -0.24826  
434A -> 438A 0.34250  
435A -> 437A 0.14490  
435A -> 438A 0.23395  
435A -> 439A -0.44689  
431B -> 438B -0.13720  
433B -> 439B 0.24826  
434B -> 438B -0.34250  
435B -> 437B -0.14490  
435B -> 438B -0.23395  
435B -> 439B 0.44689

Excited State 13: 3.000-A 0.8082 eV 1534.15 nm  $f=0.0000$   $\langle S^{*2} \rangle = 2.000$

431A -> 438A -0.14260  
433A -> 439A -0.23801  
434A -> 438A -0.35150  
435A -> 437A -0.14136  
435A -> 438A -0.30687  
435A -> 439A -0.39431  
431B -> 438B 0.14260  
433B -> 439B 0.23801  
434B -> 438B 0.35150  
435B -> 437B 0.14136  
435B -> 438B 0.30687  
435B -> 439B 0.39431

Excited State 14: 1.000-A 0.8487 eV 1460.81 nm  $f=0.0262$   $\langle S^{*2} \rangle = 0.000$

433A -> 439A -0.10225  
434A -> 437A 0.19823  
434A -> 438A 0.24564

435A -> 437A 0.18778  
 435A -> 438A 0.49088  
 435A -> 439A -0.24085  
 436A -> 438A 0.16261  
 433B -> 439B -0.10225  
 434B -> 437B 0.19823  
 434B -> 438B 0.24564  
 435B -> 437B 0.18778  
 435B -> 438B 0.49088  
 435B -> 439B -0.24085  
 436B -> 438B 0.16261

Excited State 15: 1.000-A 0.9050 eV 1370.05 nm f=0.0882 <S\*\*2>=0.000

433A -> 439A 0.42022  
 434A -> 438A 0.11527  
 435A -> 437A 0.11569  
 435A -> 438A 0.16708  
 435A -> 439A 0.28954  
 436A -> 439A -0.41171  
 433B -> 439B 0.42022  
 434B -> 438B 0.11527  
 435B -> 437B 0.11569  
 435B -> 438B 0.16708  
 435B -> 439B 0.28954  
 436B -> 439B -0.41171

Excited State 16: 3.000-A 0.9116 eV 1360.04 nm f=0.0000 <S\*\*2>=2.000

431A -> 437A -0.12717  
 432A -> 437A 0.16566  
 433A -> 437A 0.64009  
 431B -> 437B 0.12717  
 432B -> 437B -0.16566  
 433B -> 437B -0.64009

Excited State 17: 1.000-A 0.9281 eV 1335.95 nm f=0.0001 <S\*\*2>=0.000

433A -> 437A 0.68490

433B -> 437B 0.68490

Excited State 18: 3.000-A 1.0057 eV 1232.85 nm f=0.0000 <S\*\*2>=2.000

429A -> 437A -0.26626  
429A -> 438A 0.11929  
431A -> 437A -0.32226  
432A -> 437A 0.36582  
432A -> 438A -0.14522  
433A -> 437A -0.26193  
433A -> 438A -0.14036  
434A -> 437A -0.17335  
429B -> 437B 0.26626  
429B -> 438B -0.11929  
431B -> 437B 0.32226  
432B -> 437B -0.36582  
432B -> 438B 0.14522  
433B -> 437B 0.26193  
433B -> 438B 0.14036  
434B -> 437B 0.17335

Excited State 19: 1.000-A 1.0633 eV 1166.03 nm f=0.0218 <S\*\*2>=0.000

429A -> 437A 0.12972  
431A -> 437A 0.13293  
432A -> 437A -0.25542  
432A -> 438A 0.13621  
433A -> 438A 0.52287  
434A -> 437A 0.23614  
434A -> 438A -0.12918  
435A -> 437A 0.15136  
429B -> 437B 0.12972  
431B -> 437B 0.13293  
432B -> 437B -0.25542  
432B -> 438B 0.13621  
433B -> 438B 0.52287  
434B -> 437B 0.23614  
434B -> 438B -0.12918



435B -> 437B 0.15136

Excited State 20: 3.000-A 1.0675 eV 1161.43 nm f=0.0000 <S\*\*2>=2.000

429A -> 437A 0.10341

432A -> 437A -0.15455

433A -> 438A -0.66019

429B -> 437B -0.10341

432B -> 437B 0.15455

433B -> 438B 0.66019

Excited State 21: 1.000-A 1.0739 eV 1154.57 nm f=0.0226 <S\*\*2>=0.000

429A -> 437A -0.14190

431A -> 437A -0.17390

432A -> 437A 0.27559

433A -> 438A 0.45178

434A -> 437A -0.26955

434A -> 438A 0.23300

435A -> 437A -0.12062

435A -> 438A 0.11695

429B -> 437B -0.14190

431B -> 437B -0.17390

432B -> 437B 0.27559

433B -> 438B 0.45178

434B -> 437B -0.26955

434B -> 438B 0.23300

435B -> 437B -0.12062

435B -> 438B 0.11695

Excited State 22: 3.000-A 1.0814 eV 1146.47 nm f=0.0000 <S\*\*2>=2.000

429A -> 439A -0.19500

432A -> 439A -0.54364

434A -> 439A 0.35457

435A -> 439A 0.10964

429B -> 439B 0.19500

432B -> 439B 0.54364

434B -> 439B -0.35457

435B -> 439B -0.10964

Excited State 23: 3.000-A 1.0939 eV 1133.47 nm f=0.0000 <S\*\*2>=2.000

429A -> 437A -0.20409

431A -> 437A 0.47024

431A -> 438A -0.13392

432A -> 437A 0.31348

432A -> 438A -0.11315

434A -> 437A 0.24145

429B -> 437B 0.20409

431B -> 437B -0.47024

431B -> 438B 0.13392

432B -> 437B -0.31348

432B -> 438B 0.11315

434B -> 437B -0.24145

Excited State 24: 1.000-A 1.1082 eV 1118.76 nm f=0.0011 <S\*\*2>=0.000

434A -> 439A 0.67133

435A -> 439A 0.15767

434B -> 439B 0.67133

435B -> 439B 0.15767

Excited State 25: 3.000-A 1.1206 eV 1106.41 nm f=0.0000 <S\*\*2>=2.000

429A -> 439A -0.13327

431A -> 439A -0.11036

432A -> 439A -0.33001

434A -> 439A -0.58525

429B -> 439B 0.13327

431B -> 439B 0.11036

432B -> 439B 0.33001

434B -> 439B 0.58525

Excited State 26: 1.000-A 1.1407 eV 1086.95 nm f=0.0292 <S\*\*2>=0.000

429A -> 437A -0.16392

431A -> 437A 0.25725

432A -> 437A 0.47122

434A -> 437A 0.11894  
434A -> 438A -0.36458  
429B -> 437B -0.16392  
431B -> 437B 0.25725  
432B -> 437B 0.47122  
434B -> 437B 0.11894  
434B -> 438B -0.36458

Excited State 27: 3.000-A 1.1432 eV 1084.56 nm  $f=0.0000$   $\langle S^{*2} \rangle = 2.000$

429A -> 438A 0.38862  
432A -> 437A -0.21042  
432A -> 438A -0.48548  
433A -> 438A 0.10596  
434A -> 438A 0.12943  
429B -> 438B -0.38862  
432B -> 437B 0.21042  
432B -> 438B 0.48548  
433B -> 438B -0.10596  
434B -> 438B -0.12943

Excited State 28: 3.000-A 1.1510 eV 1077.22 nm  $f=0.0000$   $\langle S^{*2} \rangle = 2.000$

422A -> 437A 0.66790  
422A -> 438A -0.16622  
422B -> 437B -0.66790  
422B -> 438B 0.16622

Excited State 29: 1.000-A 1.1859 eV 1045.51 nm  $f=0.0055$   $\langle S^{*2} \rangle = 0.000$

429A -> 438A -0.20575  
431A -> 437A -0.21203  
432A -> 437A -0.14827  
432A -> 438A 0.35234  
432A -> 439A 0.11232  
433A -> 439A 0.11681  
434A -> 437A -0.31898  
434A -> 438A -0.24657  
435A -> 438A 0.24666

436A -> 438A 0.10779  
 429B -> 438B -0.20575  
 431B -> 437B -0.21203  
 432B -> 437B -0.14827  
 432B -> 438B 0.35234  
 432B -> 439B 0.11232  
 433B -> 439B 0.11681  
 434B -> 437B -0.31898  
 434B -> 438B -0.24657  
 435B -> 438B 0.24666  
 436B -> 438B 0.10779  
 435A <- 438A -0.10157  
 435B <- 438B -0.10157

Excited State 30: 3.000-A 1.1893 eV 1042.52 nm f=0.0000 <S\*\*2>=2.000

423A -> 437A -0.27885  
 423A -> 438A -0.62199  
 423B -> 437B 0.27885  
 423B -> 438B 0.62199

Excited State 31: 1.000-A 1.2515 eV 990.69 nm f=0.0654 <S\*\*2>=0.000

429A -> 439A 0.12943  
 432A -> 438A -0.12125  
 432A -> 439A 0.56687  
 433A -> 439A 0.18291  
 435A -> 439A -0.11234  
 436A -> 439A 0.25299  
 429B -> 439B 0.12943  
 432B -> 438B -0.12125  
 432B -> 439B 0.56687  
 433B -> 439B 0.18291  
 435B -> 439B -0.11234  
 436B -> 439B 0.25299

Excited State 32: 3.000-A 1.2758 eV 971.82 nm f=0.0000 <S\*\*2>=2.000

425A -> 439A -0.67201

425A -> 444A 0.10300  
426A -> 439A 0.12390  
425B -> 439B 0.67201  
425B -> 444B -0.10300  
426B -> 439B -0.12390

Excited State 33: 3.000-A 1.2850 eV 964.88 nm f=0.0000 <S\*\*2>=2.000

428A -> 437A -0.12137  
429A -> 437A 0.44596  
430A -> 437A 0.31663  
432A -> 437A 0.38924  
428B -> 437B 0.12137  
429B -> 437B -0.44596  
430B -> 437B -0.31663  
432B -> 437B -0.38924

Excited State 34: 1.000-A 1.2974 eV 955.67 nm f=0.0040 <S\*\*2>=0.000

429A -> 437A 0.29233  
430A -> 437A 0.40331  
431A -> 437A -0.24587  
431A -> 438A -0.11636  
432A -> 437A 0.28082  
432A -> 438A 0.14265  
434A -> 437A 0.14036  
434A -> 438A 0.11481  
429B -> 437B 0.29233  
430B -> 437B 0.40331  
431B -> 437B -0.24587  
431B -> 438B -0.11636  
432B -> 437B 0.28082  
432B -> 438B 0.14265  
434B -> 437B 0.14036  
434B -> 438B 0.11481

Excited State 35: 3.000-A 1.2990 eV 954.46 nm f=0.0000 <S\*\*2>=2.000

431A -> 437A 0.18164

431A -> 438A 0.60387  
434A -> 438A -0.23141  
431B -> 437B -0.18164  
431B -> 438B -0.60387  
434B -> 438B 0.23141

Excited State 36: 3.000-A 1.3426 eV 923.44 nm f=0.0000 <S\*\*2>=2.000

429A -> 437A -0.32884  
430A -> 437A 0.59644  
432A -> 437A -0.11472  
429B -> 437B 0.32884  
430B -> 437B -0.59644  
432B -> 437B 0.11472

Excited State 37: 1.000-A 1.3511 eV 917.64 nm f=0.0050 <S\*\*2>=0.000

429A -> 437A 0.15552  
430A -> 437A 0.31806  
431A -> 438A 0.36275  
432A -> 438A -0.32126  
434A -> 437A -0.17107  
434A -> 438A -0.22576  
435A -> 438A 0.13945  
429B -> 437B 0.15552  
430B -> 437B 0.31806  
431B -> 438B 0.36275  
432B -> 438B -0.32126  
434B -> 437B -0.17107  
434B -> 438B -0.22576  
435B -> 438B 0.13945

Excited State 38: 1.000-A 1.3563 eV 914.13 nm f=0.0007 <S\*\*2>=0.000

429A -> 437A 0.50513  
430A -> 437A -0.43810  
431A -> 438A 0.11688  
432A -> 437A 0.15224  
429B -> 437B 0.50513

430B -> 437B -0.43810  
431B -> 438B 0.11688  
432B -> 437B 0.15224

Excited State 39: 3.000-A 1.4058 eV 881.94 nm f=0.0000 <S\*\*2>=2.000

428A -> 439A -0.42913  
429A -> 439A -0.16074  
430A -> 439A 0.42077  
431A -> 439A -0.26447  
433A -> 439A 0.11607  
428B -> 439B 0.42913  
429B -> 439B 0.16074  
430B -> 439B -0.42077  
431B -> 439B 0.26447  
433B -> 439B -0.11607

Excited State 40: 1.000-A 1.4168 eV 875.09 nm f=0.0813 <S\*\*2>=0.000

428A -> 437A 0.17547  
429A -> 437A 0.17101  
429A -> 438A 0.14522  
430A -> 437A 0.12218  
431A -> 437A 0.41159  
431A -> 438A 0.10678  
432A -> 438A 0.33335  
434A -> 437A -0.18595  
434A -> 438A 0.19125  
435A -> 437A -0.16891  
428B -> 437B 0.17547  
429B -> 437B 0.17101  
429B -> 438B 0.14522  
430B -> 437B 0.12218  
431B -> 437B 0.41159  
431B -> 438B 0.10678  
432B -> 438B 0.33335  
434B -> 437B -0.18595  
434B -> 438B 0.19125

435B -> 437B -0.16891

Excited State 41: 1.000-A 1.4203 eV 872.96 nm f=0.1526 <S\*\*2>=0.000

425A -> 439A -0.11356

430A -> 439A 0.12900

432A -> 439A -0.32025

433A -> 439A 0.48562

435A -> 439A -0.15345

436A -> 439A 0.31367

425B -> 439B -0.11356

430B -> 439B 0.12900

432B -> 439B -0.32025

433B -> 439B 0.48562

435B -> 439B -0.15345

436B -> 439B 0.31367

436A <- 439A -0.15191

436B <- 439B -0.15191

Excited State 42: 1.000-A 1.4362 eV 863.27 nm f=0.0067 <S\*\*2>=0.000

428A -> 437A -0.14637

429A -> 437A -0.15302

429A -> 438A 0.22144

431A -> 437A -0.18932

431A -> 438A 0.46494

432A -> 438A 0.28854

434A -> 437A 0.16462

435A -> 438A -0.13702

428B -> 437B -0.14637

429B -> 437B -0.15302

429B -> 438B 0.22144

431B -> 437B -0.18932

431B -> 438B 0.46494

432B -> 438B 0.28854

434B -> 437B 0.16462

435B -> 438B -0.13702



Excited State 43: 3.000-A 1.4466 eV 857.06 nm f=0.0000 <S\*\*2>=2.000

427A -> 437A 0.14509  
428A -> 437A 0.31700  
429A -> 437A 0.13832  
429A -> 438A 0.40892  
430A -> 438A 0.12409  
432A -> 438A 0.37981  
427B -> 437B -0.14509  
428B -> 437B -0.31700  
429B -> 437B -0.13832  
429B -> 438B -0.40892  
430B -> 438B -0.12409  
432B -> 438B -0.37981

Excited State 44: 3.000-A 1.4541 eV 852.65 nm f=0.0000 <S\*\*2>=2.000

427A -> 437A 0.17401  
427A -> 438A -0.11482  
428A -> 437A 0.48863  
429A -> 438A -0.28047  
430A -> 439A 0.16142  
432A -> 438A -0.23688  
427B -> 437B -0.17401  
427B -> 438B 0.11482  
428B -> 437B -0.48863  
429B -> 438B 0.28047  
430B -> 439B -0.16142  
432B -> 438B 0.23688

Excited State 45: 3.000-A 1.4588 eV 849.88 nm f=0.0000 <S\*\*2>=2.000

428A -> 437A 0.16481  
428A -> 439A -0.27203  
430A -> 439A -0.48182  
431A -> 439A -0.28508  
432A -> 439A 0.17726  
433A -> 439A -0.12483  
428B -> 437B -0.16481

428B -> 439B 0.27203  
430B -> 439B 0.48182  
431B -> 439B 0.28508  
432B -> 439B -0.17726  
433B -> 439B 0.12483

Excited State 46: 1.000-A 1.4748 eV 840.66 nm f=0.0051 <S\*\*2>=0.000

428A -> 439A 0.41982  
429A -> 439A 0.16818  
430A -> 439A -0.27107  
431A -> 439A 0.43841  
428B -> 439B 0.41982  
429B -> 439B 0.16818  
430B -> 439B -0.27107  
431B -> 439B 0.43841

Excited State 47: 1.000-A 1.4893 eV 832.52 nm f=0.0138 <S\*\*2>=0.000

422A -> 437A -0.18153  
427A -> 437A 0.13272  
428A -> 437A 0.60518  
431A -> 437A -0.13774  
431A -> 438A 0.12049  
422B -> 437B -0.18153  
427B -> 437B 0.13272  
428B -> 437B 0.60518  
431B -> 437B -0.13774  
431B -> 438B 0.12049

Excited State 48: 1.000-A 1.5330 eV 808.76 nm f=0.0081 <S\*\*2>=0.000

425A -> 439A 0.10849  
430A -> 439A 0.60466  
431A -> 439A 0.29378  
425B -> 439B 0.10849  
430B -> 439B 0.60466  
431B -> 439B 0.29378

Excited State 49: 1.000-A 1.5340 eV 808.22 nm f=0.0061 <S\*\*2>=0.000

|              |          |
|--------------|----------|
| 422A -> 437A | 0.58393  |
| 422A -> 438A | -0.14028 |
| 428A -> 437A | 0.11550  |
| 429A -> 438A | -0.15835 |
| 430A -> 438A | -0.22441 |
| 431A -> 438A | 0.10475  |
| 422B -> 437B | 0.58393  |
| 422B -> 438B | -0.14028 |
| 428B -> 437B | 0.11550  |
| 429B -> 438B | -0.15835 |
| 430B -> 438B | -0.22441 |
| 431B -> 438B | 0.10475  |

Excited State 50: 1.000-A 1.5441 eV 802.95 nm f=0.0591 <S\*\*2>=0.000

|              |          |
|--------------|----------|
| 422A -> 437A | 0.26700  |
| 423A -> 438A | 0.10702  |
| 429A -> 438A | 0.29166  |
| 430A -> 438A | 0.48769  |
| 431A -> 437A | -0.13250 |
| 434A -> 438A | -0.14734 |
| 422B -> 437B | 0.26700  |
| 423B -> 438B | 0.10702  |
| 429B -> 438B | 0.29166  |
| 430B -> 438B | 0.48769  |
| 431B -> 437B | -0.13250 |
| 434B -> 438B | -0.14734 |

Excited State 51: 3.000-A 1.5501 eV 799.83 nm f=0.0000 <S\*\*2>=2.000

|              |          |
|--------------|----------|
| 427A -> 438A | 0.10442  |
| 428A -> 438A | 0.12409  |
| 429A -> 438A | 0.11232  |
| 430A -> 438A | -0.64748 |
| 431A -> 438A | -0.11076 |
| 427B -> 438B | -0.10442 |
| 428B -> 438B | -0.12409 |

429B -> 438B -0.11232  
430B -> 438B 0.64748  
431B -> 438B 0.11076

Excited State 52: 1.000-A 1.5652 eV 792.15 nm f=0.0174 <S\*\*2>=0.000

423A -> 438A 0.19042  
429A -> 438A 0.42043  
430A -> 438A -0.41491  
431A -> 438A -0.21974  
434A -> 438A -0.11576  
423B -> 438B 0.19042  
429B -> 438B 0.42043  
430B -> 438B -0.41491  
431B -> 438B -0.21974  
434B -> 438B -0.11576

Excited State 53: 3.000-A 1.5760 eV 786.69 nm f=0.0000 <S\*\*2>=2.000

428A -> 439A -0.23530  
429A -> 439A -0.34940  
431A -> 439A 0.53851  
432A -> 439A 0.12355  
428B -> 439B 0.23530  
429B -> 439B 0.34940  
431B -> 439B -0.53851  
432B -> 439B -0.12355

Excited State 54: 1.000-A 1.5926 eV 778.52 nm f=0.0124 <S\*\*2>=0.000

423A -> 437A 0.27433  
423A -> 438A 0.57308  
425A -> 438A -0.10408  
429A -> 438A -0.17287  
431A -> 438A 0.10430  
423B -> 437B 0.27433  
423B -> 438B 0.57308  
425B -> 438B -0.10408  
429B -> 438B -0.17287

431B -> 438B 0.10430

Excited State 55: 3.000-A 1.5939 eV 777.86 nm f=0.0000 <S\*\*2>=2.000

428A -> 439A -0.39627

429A -> 439A 0.51627

431A -> 439A 0.19419

432A -> 439A -0.16183

428B -> 439B 0.39627

429B -> 439B -0.51627

431B -> 439B -0.19419

432B -> 439B 0.16183

Excited State 56: 1.000-A 1.5985 eV 775.64 nm f=0.0013 <S\*\*2>=0.000

428A -> 439A -0.39801

429A -> 439A -0.33302

430A -> 439A -0.14296

431A -> 439A 0.42555

428B -> 439B -0.39801

429B -> 439B -0.33302

430B -> 439B -0.14296

431B -> 439B 0.42555

Excited State 57: 3.000-A 1.6037 eV 773.13 nm f=0.0000 <S\*\*2>=2.000

426A -> 437A 0.15261

427A -> 437A 0.36846

427A -> 438A -0.22784

428A -> 437A -0.29492

428A -> 438A -0.37578

430A -> 438A -0.16859

426B -> 437B -0.15261

427B -> 437B -0.36846

427B -> 438B 0.22784

428B -> 437B 0.29492

428B -> 438B 0.37578

430B -> 438B 0.16859

Excited State 58: 1.000-A 1.6096 eV 770.29 nm f=0.0002 <S\*\*2>=0.000

428A -> 439A -0.37694

429A -> 439A 0.56851

431A -> 439A 0.10813

432A -> 439A -0.12028

428B -> 439B -0.37694

429B -> 439B 0.56851

431B -> 439B 0.10813

432B -> 439B -0.12028

Excited State 59: 1.000-A 1.6309 eV 760.23 nm f=0.0187 <S\*\*2>=0.000

425A -> 439A 0.65028

426A -> 439A -0.12471

430A -> 439A -0.10907

433A -> 439A 0.10232

425B -> 439B 0.65028

426B -> 439B -0.12471

430B -> 439B -0.10907

433B -> 439B 0.10232

Excited State 60: 1.000-A 1.6397 eV 756.16 nm f=0.0021 <S\*\*2>=0.000

427A -> 437A -0.18052

427A -> 438A 0.19674

428A -> 437A 0.14804

428A -> 438A 0.61102

430A -> 438A 0.11356

427B -> 437B -0.18052

427B -> 438B 0.19674

428B -> 437B 0.14804

428B -> 438B 0.61102

430B -> 438B 0.11356

Excited State 61: 3.000-A 1.6497 eV 751.54 nm f=0.0000 <S\*\*2>=2.000

426A -> 437A -0.16305

427A -> 437A -0.41021

428A -> 438A -0.52313

426B -> 437B 0.16305  
427B -> 437B 0.41021  
428B -> 438B 0.52313

Excited State 62: 1.000-A 1.6811 eV 737.51 nm f=0.0009 <S\*\*2>=0.000

426A -> 437A 0.21294  
427A -> 437A 0.59004  
428A -> 437A -0.12490  
428A -> 438A 0.26397  
426B -> 437B 0.21294  
427B -> 437B 0.59004  
428B -> 437B -0.12490  
428B -> 438B 0.26397

Excited State 63: 3.000-A 1.7791 eV 696.91 nm f=0.0000 <S\*\*2>=2.000

421A -> 438A -0.13131  
426A -> 438A -0.19364  
427A -> 437A -0.18353  
427A -> 438A -0.55857  
428A -> 438A 0.17136  
429A -> 438A 0.16265  
421B -> 438B 0.13131  
426B -> 438B 0.19364  
427B -> 437B 0.18353  
427B -> 438B 0.55857  
428B -> 438B -0.17136  
429B -> 438B -0.16265

Excited State 64: 1.000-A 1.8304 eV 677.38 nm f=0.0013 <S\*\*2>=0.000

426A -> 438A 0.21100  
427A -> 437A 0.16931  
427A -> 438A 0.61327  
428A -> 438A -0.17201  
426B -> 438B 0.21100  
427B -> 437B 0.16931  
427B -> 438B 0.61327

428B -> 438B -0.17201

Excited State 65: 3.000-A 1.8437 eV 672.47 nm f=0.0000 <S\*\*2>=2.000

398A -> 437A 0.11153

401A -> 437A -0.12519

418A -> 437A -0.11752

419A -> 437A -0.25442

424A -> 437A 0.51748

424A -> 438A -0.13029

427A -> 437A -0.14198

398B -> 437B -0.11153

401B -> 437B 0.12519

418B -> 437B 0.11752

419B -> 437B 0.25442

424B -> 437B -0.51748

424B -> 438B 0.13029

427B -> 437B 0.14198

Excited State 66: 3.000-A 1.8874 eV 656.90 nm f=0.0000 <S\*\*2>=2.000

408A -> 439A -0.14370

417A -> 439A -0.13708

420A -> 439A 0.27873

421A -> 439A 0.10324

426A -> 439A 0.32649

427A -> 439A -0.40733

408B -> 439B 0.14370

417B -> 439B 0.13708

420B -> 439B -0.27873

421B -> 439B -0.10324

426B -> 439B -0.32649

427B -> 439B 0.40733

Excited State 67: 3.000-A 1.8904 eV 655.85 nm f=0.0000 <S\*\*2>=2.000

399A -> 438A -0.10121

400A -> 438A 0.11833

402A -> 438A -0.10674



|              |          |
|--------------|----------|
| 403A -> 438A | 0.15834  |
| 406A -> 438A | -0.18764 |
| 410A -> 438A | -0.12251 |
| 414A -> 438A | 0.17708  |
| 416A -> 438A | -0.19028 |
| 419A -> 438A | 0.13175  |
| 420A -> 438A | 0.10807  |
| 421A -> 438A | -0.20221 |
| 424A -> 437A | 0.11368  |
| 424A -> 438A | 0.17937  |
| 427A -> 438A | 0.14760  |
| 399B -> 438B | 0.10121  |
| 400B -> 438B | -0.11833 |
| 402B -> 438B | 0.10674  |
| 403B -> 438B | -0.15834 |
| 406B -> 438B | 0.18764  |
| 410B -> 438B | 0.12251  |
| 414B -> 438B | -0.17708 |
| 416B -> 438B | 0.19028  |
| 419B -> 438B | -0.13175 |
| 420B -> 438B | -0.10807 |
| 421B -> 438B | 0.20221  |
| 424B -> 437B | -0.11368 |
| 424B -> 438B | -0.17937 |
| 427B -> 438B | -0.14760 |

Excited State 68: 3.000-A 1.9143 eV 647.69 nm f=0.0000 <S\*\*2>=2.000

|              |          |
|--------------|----------|
| 398A -> 437A | -0.11000 |
| 401A -> 437A | 0.15637  |
| 409A -> 437A | -0.13090 |
| 411A -> 437A | 0.13429  |
| 413A -> 437A | -0.16258 |
| 415A -> 437A | 0.11738  |
| 416A -> 437A | 0.13750  |
| 421A -> 437A | -0.20322 |
| 424A -> 437A | 0.18271  |

|              |          |
|--------------|----------|
| 426A -> 437A | 0.41155  |
| 427A -> 437A | -0.12406 |
| 398B -> 437B | 0.11000  |
| 401B -> 437B | -0.15637 |
| 409B -> 437B | 0.13090  |
| 411B -> 437B | -0.13429 |
| 413B -> 437B | 0.16258  |
| 415B -> 437B | -0.11738 |
| 416B -> 437B | -0.13750 |
| 421B -> 437B | 0.20322  |
| 424B -> 437B | -0.18271 |
| 426B -> 437B | -0.41155 |
| 427B -> 437B | 0.12406  |

Excited State 69: 3.000-A 1.9198 eV 645.83 nm f=0.0000 <S\*\*2>=2.000

|              |          |
|--------------|----------|
| 408A -> 439A | 0.17004  |
| 409A -> 439A | -0.11220 |
| 411A -> 439A | -0.12231 |
| 414A -> 439A | -0.21845 |
| 416A -> 439A | -0.11621 |
| 417A -> 439A | 0.21549  |
| 420A -> 439A | -0.30410 |
| 426A -> 439A | 0.29172  |
| 427A -> 439A | -0.29043 |
| 408B -> 439B | -0.17004 |
| 409B -> 439B | 0.11220  |
| 411B -> 439B | 0.12231  |
| 414B -> 439B | 0.21845  |
| 416B -> 439B | 0.11621  |
| 417B -> 439B | -0.21549 |
| 420B -> 439B | 0.30410  |
| 426B -> 439B | -0.29172 |
| 427B -> 439B | 0.29043  |

Excited State 70: 1.000-A 1.9339 eV 641.11 nm f=0.0002 <S\*\*2>=0.000

|              |          |
|--------------|----------|
| 421A -> 437A | -0.11600 |
|--------------|----------|

424A -> 437A -0.15150  
 426A -> 437A 0.62892  
 427A -> 437A -0.21924  
 421B -> 437B -0.11600  
 424B -> 437B -0.15150  
 426B -> 437B 0.62892  
 427B -> 437B -0.21924

Excited State 71: 3.000-A 1.9362 eV 640.36 nm f=0.0000 <S\*\*2>=2.000

416A -> 437A -0.10579  
 419A -> 437A -0.12929  
 424A -> 437A -0.34014  
 424A -> 438A 0.10473  
 426A -> 437A 0.44562  
 427A -> 437A -0.17541  
 416B -> 437B 0.10579  
 419B -> 437B 0.12929  
 424B -> 437B 0.34014  
 424B -> 438B -0.10473  
 426B -> 437B -0.44562  
 427B -> 437B 0.17541

Excited State 72: 3.000-A 1.9511 eV 635.45 nm f=0.0000 <S\*\*2>=2.000

424A -> 438A 0.10857  
 425A -> 437A -0.39433  
 425A -> 438A -0.53031  
 426A -> 438A 0.13187  
 424B -> 438B -0.10857  
 425B -> 437B 0.39433  
 425B -> 438B 0.53031  
 426B -> 438B -0.13187

Excited State 73: 1.000-A 1.9515 eV 635.33 nm f=0.0087 <S\*\*2>=0.000

424A -> 437A 0.64031  
 425A -> 437A -0.13153  
 425A -> 438A -0.14017

426A -> 437A 0.14348  
424B -> 437B 0.64031  
425B -> 437B -0.13153  
425B -> 438B -0.14017  
426B -> 437B 0.14348

Excited State 74: 1.000-A 1.9613 eV 632.15 nm f=0.0020 <S\*\*2>=0.000

424A -> 437A 0.18531  
425A -> 437A 0.39900  
425A -> 438A 0.51919  
426A -> 438A -0.11042  
424B -> 437B 0.18531  
425B -> 437B 0.39900  
425B -> 438B 0.51919  
426B -> 438B -0.11042

Excited State 75: 1.000-A 1.9960 eV 621.16 nm f=0.0141 <S\*\*2>=0.000

426A -> 439A -0.19005  
427A -> 439A 0.66807  
426B -> 439B -0.19005  
427B -> 439B 0.66807

Excited State 76: 3.000-A 2.0080 eV 617.46 nm f=0.0000 <S\*\*2>=2.000

410A -> 439A 0.11264  
419A -> 439A -0.15075  
424A -> 439A -0.12566  
426A -> 439A -0.45262  
427A -> 439A -0.43461  
410B -> 439B -0.11264  
419B -> 439B 0.15075  
424B -> 439B 0.12566  
426B -> 439B 0.45262  
427B -> 439B 0.43461

Excited State 77: 3.000-A 2.0414 eV 607.36 nm f=0.0000 <S\*\*2>=2.000

407A -> 439A -0.11944

|              |          |
|--------------|----------|
| 408A -> 439A | -0.26380 |
| 410A -> 439A | -0.32793 |
| 414A -> 439A | -0.23083 |
| 415A -> 439A | 0.10577  |
| 416A -> 439A | -0.15275 |
| 418A -> 439A | -0.18290 |
| 420A -> 439A | -0.12120 |
| 421A -> 439A | 0.18404  |
| 424A -> 439A | 0.16938  |
| 426A -> 439A | -0.20408 |
| 407B -> 439B | 0.11944  |
| 408B -> 439B | 0.26380  |
| 410B -> 439B | 0.32793  |
| 414B -> 439B | 0.23083  |
| 415B -> 439B | -0.10577 |
| 416B -> 439B | 0.15275  |
| 418B -> 439B | 0.18290  |
| 420B -> 439B | 0.12120  |
| 421B -> 439B | -0.18404 |
| 424B -> 439B | -0.16938 |
| 426B -> 439B | 0.20408  |

Excited State 78: 3.000-A 2.0426 eV 606.98 nm f=0.0000 <S\*\*2>=2.000

|              |          |
|--------------|----------|
| 419A -> 438A | -0.10962 |
| 421A -> 438A | -0.10443 |
| 424A -> 437A | 0.13766  |
| 424A -> 438A | 0.53822  |
| 425A -> 437A | 0.11673  |
| 426A -> 438A | 0.18318  |
| 419B -> 438B | 0.10962  |
| 421B -> 438B | 0.10443  |
| 424B -> 437B | -0.13766 |
| 424B -> 438B | -0.53822 |
| 425B -> 437B | -0.11673 |
| 426B -> 438B | -0.18318 |

Excited State 79: 1.000-A 2.0549 eV 603.36 nm f=0.0062 <S\*\*2>=0.000

425A -> 439A 0.12671  
426A -> 439A 0.65430  
427A -> 439A 0.19376  
425B -> 439B 0.12671  
426B -> 439B 0.65430  
427B -> 439B 0.19376

Excited State 80: 3.000-A 2.0707 eV 598.75 nm f=0.0000 <S\*\*2>=2.000

402A -> 437A 0.19665  
405A -> 437A 0.15789  
409A -> 437A -0.21737  
411A -> 437A 0.25269  
415A -> 437A -0.11276  
420A -> 437A 0.11367  
421A -> 437A 0.41068  
402B -> 437B -0.19665  
405B -> 437B -0.15789  
409B -> 437B 0.21737  
411B -> 437B -0.25269  
415B -> 437B 0.11276  
420B -> 437B -0.11367  
421B -> 437B -0.41068

Excited State 81: 3.000-A 2.0849 eV 594.68 nm f=0.0000 <S\*\*2>=2.000

395A -> 438A 0.10609  
405A -> 437A -0.10260  
405A -> 438A -0.18626  
406A -> 438A 0.12315  
407A -> 438A 0.22094  
409A -> 438A -0.24499  
414A -> 438A 0.16794  
416A -> 438A -0.17065  
417A -> 438A -0.17209  
418A -> 438A 0.14825  
424A -> 438A 0.21356

425A -> 437A -0.10206  
 426A -> 438A -0.10567  
 395B -> 438B -0.10609  
 405B -> 437B 0.10260  
 405B -> 438B 0.18626  
 406B -> 438B -0.12315  
 407B -> 438B -0.22094  
 409B -> 438B 0.24499  
 414B -> 438B -0.16794  
 416B -> 438B 0.17065  
 417B -> 438B 0.17209  
 418B -> 438B -0.14825  
 424B -> 438B -0.21356  
 425B -> 437B 0.10206  
 426B -> 438B 0.10567

Excited State 82: 3.000-A 2.0894 eV 593.39 nm f=0.0000 <S\*\*2>=2.000

419A -> 437A -0.11486  
 419A -> 438A 0.12492  
 421A -> 438A 0.10087  
 424A -> 438A 0.17145  
 425A -> 438A -0.10698  
 426A -> 437A -0.11510  
 426A -> 438A -0.54880  
 427A -> 438A 0.20877  
 419B -> 437B 0.11486  
 419B -> 438B -0.12492  
 421B -> 438B -0.10087  
 424B -> 438B -0.17145  
 425B -> 438B 0.10698  
 426B -> 437B 0.11510  
 426B -> 438B 0.54880  
 427B -> 438B -0.20877

Excited State 83: 1.000-A 2.0900 eV 593.22 nm f=0.0116 <S\*\*2>=0.000

421A -> 437A -0.26979

424A -> 438A 0.46729  
426A -> 438A -0.37553  
427A -> 438A 0.15735  
421B -> 437B -0.26979  
424B -> 438B 0.46729  
426B -> 438B -0.37553  
427B -> 438B 0.15735

Excited State 84: 1.000-A 2.1045 eV 589.15 nm f=0.0183 <S\*\*2>=0.000

421A -> 437A -0.16888  
421A -> 438A -0.12032  
424A -> 438A 0.35780  
425A -> 437A 0.12713  
426A -> 438A 0.51422  
427A -> 438A -0.15543  
421B -> 437B -0.16888  
421B -> 438B -0.12032  
424B -> 438B 0.35780  
425B -> 437B 0.12713  
426B -> 438B 0.51422  
427B -> 438B -0.15543

Excited State 85: 1.000-A 2.1118 eV 587.11 nm f=0.0018 <S\*\*2>=0.000

416A -> 437A -0.11358  
421A -> 437A 0.58139  
424A -> 438A 0.34020  
416B -> 437B -0.11358  
421B -> 437B 0.58139  
424B -> 438B 0.34020

Excited State 86: 3.000-A 2.1167 eV 585.74 nm f=0.0000 <S\*\*2>=2.000

402A -> 437A -0.15199  
415A -> 437A 0.12568  
419A -> 437A 0.28602  
421A -> 437A 0.43990  
425A -> 437A -0.10908



|              |          |
|--------------|----------|
| 426A -> 437A | 0.14545  |
| 426A -> 438A | -0.18046 |
| 402B -> 437B | 0.15199  |
| 415B -> 437B | -0.12568 |
| 419B -> 437B | -0.28602 |
| 421B -> 437B | -0.43990 |
| 425B -> 437B | 0.10908  |
| 426B -> 437B | -0.14545 |
| 426B -> 438B | 0.18046  |

Excited State 87: 3.000-A 2.1208 eV 584.60 nm f=0.0000 <S\*\*2>=2.000

|              |          |
|--------------|----------|
| 408A -> 439A | 0.11755  |
| 409A -> 439A | -0.11050 |
| 415A -> 439A | -0.11985 |
| 418A -> 439A | 0.12257  |
| 419A -> 439A | 0.19892  |
| 420A -> 439A | 0.27817  |
| 424A -> 439A | 0.47531  |
| 426A -> 439A | -0.12849 |
| 427A -> 439A | -0.10905 |
| 408B -> 439B | -0.11755 |
| 409B -> 439B | 0.11050  |
| 415B -> 439B | 0.11985  |
| 418B -> 439B | -0.12257 |
| 419B -> 439B | -0.19892 |
| 420B -> 439B | -0.27817 |
| 424B -> 439B | -0.47531 |
| 426B -> 439B | 0.12849  |
| 427B -> 439B | 0.10905  |

Excited State 88: 3.000-A 2.1269 eV 582.94 nm f=0.0000 <S\*\*2>=2.000

|              |          |
|--------------|----------|
| 421A -> 437A | 0.11367  |
| 425A -> 437A | 0.53672  |
| 425A -> 438A | -0.40492 |
| 421B -> 437B | -0.11367 |
| 425B -> 437B | -0.53672 |

425B -> 438B 0.40492

Excited State 89: 1.000-A 2.1272 eV 582.86 nm f=0.0013 <S\*\*2>=0.000

425A -> 437A 0.54371  
425A -> 438A -0.42570  
425B -> 437B 0.54371  
425B -> 438B -0.42570

Excited State 90: 3.000-A 2.1571 eV 574.77 nm f=0.0000 <S\*\*2>=2.000

397A -> 437A -0.11105  
398A -> 437A 0.23121  
401A -> 437A -0.26926  
402A -> 437A 0.16426  
413A -> 437A -0.22344  
415A -> 437A -0.18198  
419A -> 437A 0.35959  
397B -> 437B 0.11105  
398B -> 437B -0.23121  
401B -> 437B 0.26926  
402B -> 437B -0.16426  
413B -> 437B 0.22344  
415B -> 437B 0.18198  
419B -> 437B -0.35959

Excited State 91: 3.000-A 2.1615 eV 573.60 nm f=0.0000 <S\*\*2>=2.000

406A -> 438A 0.10933  
410A -> 438A 0.11190  
414A -> 438A -0.10190  
416A -> 438A -0.10164  
419A -> 437A 0.16129  
421A -> 438A -0.53628  
424A -> 438A -0.12346  
426A -> 438A -0.10131  
427A -> 438A 0.11394  
406B -> 438B -0.10933  
410B -> 438B -0.11190

414B -> 438B 0.10190  
416B -> 438B 0.10164  
419B -> 437B -0.16129  
421B -> 438B 0.53628  
424B -> 438B 0.12346  
426B -> 438B 0.10131  
427B -> 438B -0.11394

Excited State 92: 1.000-A 2.1726 eV 570.67 nm f=0.0224 <S\*\*2>=0.000

418A -> 437A 0.19279  
419A -> 437A 0.60087  
420A -> 437A -0.15227  
421A -> 437A 0.10742  
418B -> 437B 0.19279  
419B -> 437B 0.60087  
420B -> 437B -0.15227  
421B -> 437B 0.10742

Excited State 93: 1.000-A 2.2037 eV 562.63 nm f=0.0057 <S\*\*2>=0.000

419A -> 439A 0.16592  
421A -> 438A 0.37354  
421A -> 439A 0.17329  
424A -> 439A 0.50104  
419B -> 439B 0.16592  
421B -> 438B 0.37354  
421B -> 439B 0.17329  
424B -> 439B 0.50104

Excited State 94: 1.000-A 2.2067 eV 561.85 nm f=0.0212 <S\*\*2>=0.000

416A -> 437A 0.10643  
419A -> 437A -0.11996  
419A -> 439A -0.10372  
421A -> 438A 0.49964  
421A -> 439A -0.14987  
424A -> 439A -0.35726  
416B -> 437B 0.10643

419B -> 437B -0.11996  
419B -> 439B -0.10372  
421B -> 438B 0.49964  
421B -> 439B -0.14987  
424B -> 439B -0.35726

Excited State 95: 3.000-A 2.2189 eV 558.77 nm f=0.0000 <S\*\*2>=2.000

433A -> 440A -0.18940  
435A -> 440A -0.13954  
436A -> 440A 0.66216  
433B -> 440B 0.18940  
435B -> 440B 0.13954  
436B -> 440B -0.66216

Excited State 96: 1.000-A 2.2256 eV 557.07 nm f=0.0002 <S\*\*2>=0.000

433A -> 440A -0.17651  
435A -> 440A -0.12311  
436A -> 440A 0.67097  
433B -> 440B -0.17651  
435B -> 440B -0.12311  
436B -> 440B 0.67097

Excited State 97: 3.000-A 2.2477 eV 551.61 nm f=0.0000 <S\*\*2>=2.000

393A -> 437A -0.11872  
402A -> 437A 0.25590  
414A -> 437A 0.16445  
415A -> 437A 0.30716  
416A -> 437A 0.11247  
419A -> 437A -0.19613  
420A -> 437A -0.29368  
393B -> 437B 0.11872  
402B -> 437B -0.25590  
414B -> 437B -0.16445  
415B -> 437B -0.30716  
416B -> 437B -0.11247  
419B -> 437B 0.19613

420B -> 437B 0.29368

Excited State 98: 1.000-A 2.2549 eV 549.84 nm f=0.0011 <S\*\*2>=0.000

415A -> 437A 0.33979

415A -> 438A -0.10477

416A -> 437A 0.13462

416A -> 438A -0.10405

417A -> 437A -0.14213

417A -> 438A -0.15650

418A -> 437A 0.16207

418A -> 438A 0.15372

419A -> 437A -0.19958

419A -> 438A -0.13582

420A -> 437A -0.32767

421A -> 438A -0.18334

415B -> 437B 0.33979

415B -> 438B -0.10477

416B -> 437B 0.13462

416B -> 438B -0.10405

417B -> 437B -0.14213

417B -> 438B -0.15650

418B -> 437B 0.16207

418B -> 438B 0.15372

419B -> 437B -0.19958

419B -> 438B -0.13582

420B -> 437B -0.32767

421B -> 438B -0.18334

Excited State 99: 3.000-A 2.2561 eV 549.54 nm f=0.0000 <S\*\*2>=2.000

410A -> 439A 0.11742

414A -> 439A 0.28140

415A -> 439A -0.11813

416A -> 439A 0.11534

417A -> 439A -0.21290

418A -> 439A -0.17534

419A -> 439A 0.21978

|              |          |
|--------------|----------|
| 420A -> 439A | -0.40063 |
| 424A -> 439A | 0.15946  |
| 410B -> 439B | -0.11742 |
| 414B -> 439B | -0.28140 |
| 415B -> 439B | 0.11813  |
| 416B -> 439B | -0.11534 |
| 417B -> 439B | 0.21290  |
| 418B -> 439B | 0.17534  |
| 419B -> 439B | -0.21978 |
| 420B -> 439B | 0.40063  |
| 424B -> 439B | -0.15946 |

Excited State 100: 3.000-A 2.2631 eV 547.86 nm f=0.0000 <S\*\*2>=2.000

|              |          |
|--------------|----------|
| 395A -> 437A | -0.10905 |
| 395A -> 438A | -0.29884 |
| 397A -> 438A | 0.11790  |
| 402A -> 437A | -0.15506 |
| 406A -> 438A | -0.13117 |
| 407A -> 438A | -0.13832 |
| 415A -> 437A | -0.18201 |
| 416A -> 437A | -0.12490 |
| 417A -> 437A | -0.10130 |
| 417A -> 438A | -0.21369 |
| 418A -> 437A | 0.10402  |
| 418A -> 438A | 0.19080  |
| 419A -> 438A | -0.24015 |
| 420A -> 438A | -0.10063 |
| 395B -> 437B | 0.10905  |
| 395B -> 438B | 0.29884  |
| 397B -> 438B | -0.11790 |
| 402B -> 437B | 0.15506  |
| 406B -> 438B | 0.13117  |
| 407B -> 438B | 0.13832  |
| 415B -> 437B | 0.18201  |
| 416B -> 437B | 0.12490  |
| 417B -> 437B | 0.10130  |

417B -> 438B 0.21369  
418B -> 437B -0.10402  
418B -> 438B -0.19080  
419B -> 438B 0.24015  
420B -> 438B 0.10063

Excited State 101: 3.000-A 2.2674 eV 546.81 nm  $f=0.0000$   $\langle S^{*2} \rangle = 2.000$

423A -> 437A 0.63629  
423A -> 438A -0.28464  
423B -> 437B -0.63629  
423B -> 438B 0.28464

Excited State 102: 1.000-A 2.2686 eV 546.53 nm  $f=0.0001$   $\langle S^{*2} \rangle = 0.000$

423A -> 437A 0.63331  
423A -> 438A -0.30281  
423B -> 437B 0.63331  
423B -> 438B -0.30281

Excited State 103: 1.000-A 2.2709 eV 545.97 nm  $f=0.0047$   $\langle S^{*2} \rangle = 0.000$

413A -> 437A 0.15439  
415A -> 437A 0.39681  
416A -> 437A 0.19825  
417A -> 437A 0.12338  
417A -> 438A 0.25745  
418A -> 437A -0.12598  
418A -> 438A -0.25072  
419A -> 438A 0.22457  
420A -> 438A 0.15292  
413B -> 437B 0.15439  
415B -> 437B 0.39681  
416B -> 437B 0.19825  
417B -> 437B 0.12338  
417B -> 438B 0.25745  
418B -> 437B -0.12598  
418B -> 438B -0.25072  
419B -> 438B 0.22457

420B -> 438B 0.15292

Excited State 104: 3.000-A 2.2805 eV 543.67 nm f=0.0000 <S\*\*2>=2.000

393A -> 437A -0.10874

395A -> 438A -0.11621

401A -> 437A -0.14441

410A -> 437A 0.13146

412A -> 437A -0.15121

413A -> 437A 0.22356

414A -> 437A -0.16732

415A -> 437A 0.30205

419A -> 437A 0.11915

420A -> 437A 0.35089

393B -> 437B 0.10874

395B -> 438B 0.11621

401B -> 437B 0.14441

410B -> 437B -0.13146

412B -> 437B 0.15121

413B -> 437B -0.22356

414B -> 437B 0.16732

415B -> 437B -0.30205

419B -> 437B -0.11915

420B -> 437B -0.35089

Excited State 105: 3.000-A 2.2856 eV 542.45 nm f=0.0000 <S\*\*2>=2.000

407A -> 439A -0.11825

409A -> 439A -0.13554

410A -> 439A -0.10829

418A -> 439A -0.14626

420A -> 439A 0.11108

421A -> 439A -0.55615

424A -> 439A -0.14243

407B -> 439B 0.11825

409B -> 439B 0.13554

410B -> 439B 0.10829

418B -> 439B 0.14626



420B -> 439B -0.11108  
421B -> 439B 0.55615  
424B -> 439B 0.14243

Excited State 106: 3.000-A 2.2873 eV 542.04 nm f=0.0000 <S\*\*2>=2.000

398A -> 437A -0.20000  
401A -> 437A 0.15285  
402A -> 437A 0.31552  
406A -> 437A -0.10927  
409A -> 437A 0.14587  
410A -> 437A -0.10915  
413A -> 437A 0.24192  
415A -> 437A -0.13600  
416A -> 437A -0.18658  
419A -> 437A 0.13933  
420A -> 437A 0.11024  
398B -> 437B 0.20000  
401B -> 437B -0.15285  
402B -> 437B -0.31552  
406B -> 437B 0.10927  
409B -> 437B -0.14587  
410B -> 437B 0.10915  
413B -> 437B -0.24192  
415B -> 437B 0.13600  
416B -> 437B 0.18658  
419B -> 437B -0.13933  
420B -> 437B -0.11024

Excited State 107: 1.000-A 2.2892 eV 541.61 nm f=0.0185 <S\*\*2>=0.000

408A -> 439A -0.11999  
417A -> 439A -0.10665  
418A -> 439A -0.18954  
420A -> 439A -0.38560  
421A -> 439A 0.46654  
424A -> 439A -0.15464  
408B -> 439B -0.11999

417B -> 439B -0.10665  
418B -> 439B -0.18954  
420B -> 439B -0.38560  
421B -> 439B 0.46654  
424B -> 439B -0.15464

Excited State 108: 1.000-A 2.2990 eV 539.29 nm f=0.0006 <S\*\*2>=0.000

410A -> 437A 0.10867  
413A -> 437A 0.21077  
414A -> 437A -0.15256  
415A -> 437A 0.18668  
417A -> 437A -0.10983  
417A -> 438A -0.18168  
418A -> 437A 0.11460  
418A -> 438A 0.15327  
419A -> 438A -0.12078  
420A -> 437A 0.48706  
410B -> 437B 0.10867  
413B -> 437B 0.21077  
414B -> 437B -0.15256  
415B -> 437B 0.18668  
417B -> 437B -0.10983  
417B -> 438B -0.18168  
418B -> 437B 0.11460  
418B -> 438B 0.15327  
419B -> 438B -0.12078  
420B -> 437B 0.48706

Excited State 109: 3.000-A 2.3023 eV 538.51 nm f=0.0000 <S\*\*2>=2.000

403A -> 438A -0.10816  
407A -> 437A -0.10849  
407A -> 438A -0.16917  
408A -> 438A 0.16669  
413A -> 437A -0.16588  
415A -> 438A 0.10701  
416A -> 437A -0.13199

|              |          |
|--------------|----------|
| 416A -> 438A | -0.29252 |
| 417A -> 438A | 0.15348  |
| 419A -> 438A | 0.26251  |
| 420A -> 437A | -0.10704 |
| 421A -> 438A | 0.11364  |
| 403B -> 438B | 0.10816  |
| 407B -> 437B | 0.10849  |
| 407B -> 438B | 0.16917  |
| 408B -> 438B | -0.16669 |
| 413B -> 437B | 0.16588  |
| 415B -> 438B | -0.10701 |
| 416B -> 437B | 0.13199  |
| 416B -> 438B | 0.29252  |
| 417B -> 438B | -0.15348 |
| 419B -> 438B | -0.26251 |
| 420B -> 437B | 0.10704  |
| 421B -> 438B | -0.11364 |

Excited State 110: 3.000-A 2.3095 eV 536.84 nm f=0.0000 <S\*\*2>=2.000

|              |          |
|--------------|----------|
| 434A -> 440A | -0.18498 |
| 435A -> 440A | -0.65467 |
| 436A -> 440A | -0.16231 |
| 434B -> 440B | 0.18498  |
| 435B -> 440B | 0.65467  |
| 436B -> 440B | 0.16231  |

Excited State 111: 1.000-A 2.3113 eV 536.44 nm f=0.0002 <S\*\*2>=0.000

|              |         |
|--------------|---------|
| 434A -> 440A | 0.18385 |
| 435A -> 440A | 0.66305 |
| 436A -> 440A | 0.14054 |
| 434B -> 440B | 0.18385 |
| 435B -> 440B | 0.66305 |
| 436B -> 440B | 0.14054 |

Excited State 112: 1.000-A 2.3169 eV 535.12 nm f=0.0260 <S\*\*2>=0.000

|              |         |
|--------------|---------|
| 418A -> 439A | 0.13513 |
|--------------|---------|

|              |          |
|--------------|----------|
| 419A -> 439A | -0.10056 |
| 420A -> 439A | 0.47286  |
| 421A -> 439A | 0.42147  |
| 424A -> 439A | -0.18913 |
| 418B -> 439B | 0.13513  |
| 419B -> 439B | -0.10056 |
| 420B -> 439B | 0.47286  |
| 421B -> 439B | 0.42147  |
| 424B -> 439B | -0.18913 |

Excited State 113: 3.000-A 2.3244 eV 533.40 nm f=0.0000 <S\*\*2>=2.000

|              |          |
|--------------|----------|
| 395A -> 438A | 0.18611  |
| 397A -> 438A | -0.11369 |
| 407A -> 438A | -0.15899 |
| 408A -> 438A | 0.10108  |
| 413A -> 438A | -0.10318 |
| 414A -> 438A | 0.15809  |
| 415A -> 438A | 0.11887  |
| 416A -> 437A | -0.11425 |
| 418A -> 438A | -0.15156 |
| 419A -> 438A | -0.42108 |
| 420A -> 437A | 0.12195  |
| 421A -> 438A | -0.10830 |
| 426A -> 438A | -0.12594 |
| 395B -> 438B | -0.18611 |
| 397B -> 438B | 0.11369  |
| 407B -> 438B | 0.15899  |
| 408B -> 438B | -0.10108 |
| 413B -> 438B | 0.10318  |
| 414B -> 438B | -0.15809 |
| 415B -> 438B | -0.11887 |
| 416B -> 437B | 0.11425  |
| 418B -> 438B | 0.15156  |
| 419B -> 438B | 0.42108  |
| 420B -> 437B | -0.12195 |
| 421B -> 438B | 0.10830  |

426B -> 438B 0.12594

Excited State 114: 3.000-A 2.3396 eV 529.95 nm f=0.0000 <S\*\*2>=2.000

395A -> 438A 0.15221

408A -> 438A -0.11412

409A -> 437A 0.16676

412A -> 437A 0.12335

413A -> 437A -0.22980

414A -> 438A -0.14292

416A -> 437A -0.11838

417A -> 437A -0.16028

417A -> 438A -0.17432

418A -> 437A 0.17241

418A -> 438A 0.14077

419A -> 437A -0.11480

420A -> 437A 0.27444

420A -> 438A 0.21461

395B -> 438B -0.15221

408B -> 438B 0.11412

409B -> 437B -0.16676

412B -> 437B -0.12335

413B -> 437B 0.22980

414B -> 438B 0.14292

416B -> 437B 0.11838

417B -> 437B 0.16028

417B -> 438B 0.17432

418B -> 437B -0.17241

418B -> 438B -0.14077

419B -> 437B 0.11480

420B -> 437B -0.27444

420B -> 438B -0.21461

Excited State 115: 3.000-A 2.3550 eV 526.46 nm f=0.0000 <S\*\*2>=2.000

396A -> 439A -0.10689

399A -> 439A 0.13539

407A -> 439A 0.11925

|              |          |
|--------------|----------|
| 409A -> 439A | 0.15816  |
| 413A -> 439A | -0.11255 |
| 414A -> 439A | -0.10929 |
| 415A -> 439A | 0.13382  |
| 416A -> 439A | -0.16033 |
| 419A -> 439A | -0.24025 |
| 421A -> 439A | -0.29486 |
| 424A -> 439A | 0.36669  |
| 396B -> 439B | 0.10689  |
| 399B -> 439B | -0.13539 |
| 407B -> 439B | -0.11925 |
| 409B -> 439B | -0.15816 |
| 413B -> 439B | 0.11255  |
| 414B -> 439B | 0.10929  |
| 415B -> 439B | -0.13382 |
| 416B -> 439B | 0.16033  |
| 419B -> 439B | 0.24025  |
| 421B -> 439B | 0.29486  |
| 424B -> 439B | -0.36669 |

Excited State 116: 3.000-A 2.3575 eV 525.91 nm  $f=0.0000$   $\langle S^2 \rangle=2.000$

|              |          |
|--------------|----------|
| 395A -> 437A | -0.11320 |
| 395A -> 438A | -0.27916 |
| 397A -> 438A | 0.10959  |
| 405A -> 438A | -0.10063 |
| 407A -> 438A | 0.15991  |
| 409A -> 438A | -0.16900 |
| 412A -> 437A | 0.11948  |
| 413A -> 437A | -0.20344 |
| 414A -> 437A | 0.11920  |
| 415A -> 437A | 0.10394  |
| 416A -> 438A | 0.17321  |
| 417A -> 438A | 0.12236  |
| 418A -> 438A | -0.16657 |
| 420A -> 437A | 0.20989  |
| 395B -> 437B | 0.11320  |

|              |          |
|--------------|----------|
| 395B -> 438B | 0.27916  |
| 397B -> 438B | -0.10959 |
| 405B -> 438B | 0.10063  |
| 407B -> 438B | -0.15991 |
| 409B -> 438B | 0.16900  |
| 412B -> 437B | -0.11948 |
| 413B -> 437B | 0.20344  |
| 414B -> 437B | -0.11920 |
| 415B -> 437B | -0.10394 |
| 416B -> 438B | -0.17321 |
| 417B -> 438B | -0.12236 |
| 418B -> 438B | 0.16657  |
| 420B -> 437B | -0.20989 |

Excited State 117: 1.000-A 2.3582 eV 525.76 nm f=0.0048 <S\*\*2>=0.000

|              |          |
|--------------|----------|
| 413A -> 437A | 0.14641  |
| 416A -> 437A | -0.20836 |
| 416A -> 438A | -0.23189 |
| 418A -> 438A | 0.18441  |
| 419A -> 438A | 0.49133  |
| 420A -> 437A | -0.11216 |
| 421A -> 438A | 0.14621  |
| 413B -> 437B | 0.14641  |
| 416B -> 437B | -0.20836 |
| 416B -> 438B | -0.23189 |
| 418B -> 438B | 0.18441  |
| 419B -> 438B | 0.49133  |
| 420B -> 437B | -0.11216 |
| 421B -> 438B | 0.14621  |

Excited State 118: 1.000-A 2.3604 eV 525.27 nm f=0.0041 <S\*\*2>=0.000

|              |         |
|--------------|---------|
| 408A -> 439A | 0.18675 |
| 410A -> 439A | 0.21236 |
| 414A -> 439A | 0.12754 |
| 417A -> 439A | 0.25918 |
| 418A -> 439A | 0.36822 |

|              |          |
|--------------|----------|
| 419A -> 439A | -0.11649 |
| 420A -> 438A | -0.11477 |
| 420A -> 439A | -0.26823 |
| 421A -> 439A | 0.14970  |
| 423A -> 439A | 0.13495  |
| 408B -> 439B | 0.18675  |
| 410B -> 439B | 0.21236  |
| 414B -> 439B | 0.12754  |
| 417B -> 439B | 0.25918  |
| 418B -> 439B | 0.36822  |
| 419B -> 439B | -0.11649 |
| 420B -> 438B | -0.11477 |
| 420B -> 439B | -0.26823 |
| 421B -> 439B | 0.14970  |
| 423B -> 439B | 0.13495  |

Excited State 119: 1.000-A 2.3674 eV 523.71 nm  $f=0.0216$   $\langle S^{*2} \rangle = 0.000$

|              |          |
|--------------|----------|
| 413A -> 437A | -0.36670 |
| 414A -> 437A | 0.11418  |
| 417A -> 437A | -0.16340 |
| 418A -> 437A | 0.15234  |
| 419A -> 437A | -0.11747 |
| 420A -> 437A | 0.13139  |
| 420A -> 438A | 0.41725  |
| 413B -> 437B | -0.36670 |
| 414B -> 437B | 0.11418  |
| 417B -> 437B | -0.16340 |
| 418B -> 437B | 0.15234  |
| 419B -> 437B | -0.11747 |
| 420B -> 437B | 0.13139  |
| 420B -> 438B | 0.41725  |

Excited State 120: 3.000-A 2.3725 eV 522.60 nm  $f=0.0000$   $\langle S^{*2} \rangle = 2.000$

|              |          |
|--------------|----------|
| 423A -> 439A | -0.68547 |
| 423B -> 439B | 0.68547  |



Excited State 121: 1.000-A 2.3738 eV 522.29 nm  $f=0.0003$   $\langle S^{*2} \rangle = 0.000$

423A -> 439A 0.68480

423B -> 439B 0.68480

Excited State 122: 3.000-A 2.3814 eV 520.63 nm  $f=0.0000$   $\langle S^{*2} \rangle = 2.000$

393A -> 437A -0.17364

409A -> 437A 0.11129

412A -> 437A 0.16867

415A -> 437A 0.14644

416A -> 437A -0.31152

416A -> 438A 0.10387

417A -> 437A 0.12411

419A -> 438A 0.12377

420A -> 438A -0.41196

393B -> 437B 0.17364

409B -> 437B -0.11129

412B -> 437B -0.16867

415B -> 437B -0.14644

416B -> 437B 0.31152

416B -> 438B -0.10387

417B -> 437B -0.12411

419B -> 438B -0.12377

420B -> 438B 0.41196

Excited State 123: 1.000-A 2.3924 eV 518.25 nm  $f=0.0051$   $\langle S^{*2} \rangle = 0.000$

410A -> 437A -0.13477

412A -> 437A -0.12114

413A -> 437A 0.31872

415A -> 437A -0.29475

416A -> 437A 0.33427

417A -> 437A -0.16830

417A -> 438A -0.10732

420A -> 438A 0.27747

410B -> 437B -0.13477

412B -> 437B -0.12114

413B -> 437B 0.31872

415B -> 437B -0.29475  
416B -> 437B 0.33427  
417B -> 437B -0.16830  
417B -> 438B -0.10732  
420B -> 438B 0.27747

Excited State 124: 3.000-A 2.4016 eV 516.25 nm f=0.0000 <S\*\*2>=2.000

396A -> 439A -0.21997  
397A -> 439A 0.12011  
408A -> 439A 0.26495  
410A -> 439A 0.11657  
411A -> 439A -0.15578  
414A -> 439A -0.24848  
417A -> 439A -0.28083  
418A -> 439A -0.29281  
419A -> 439A 0.13273  
420A -> 439A 0.10156  
421A -> 439A 0.10527  
423A -> 439A -0.11040  
396B -> 439B 0.21997  
397B -> 439B -0.12011  
408B -> 439B -0.26495  
410B -> 439B -0.11657  
411B -> 439B 0.15578  
414B -> 439B 0.24848  
417B -> 439B 0.28083  
418B -> 439B 0.29281  
419B -> 439B -0.13273  
420B -> 439B -0.10156  
421B -> 439B -0.10527  
423B -> 439B 0.11040

Excited State 125: 1.000-A 2.4031 eV 515.94 nm f=0.0091 <S\*\*2>=0.000

413A -> 437A -0.17339  
414A -> 437A -0.19707  
415A -> 438A -0.11606

|              |          |
|--------------|----------|
| 416A -> 437A | 0.30089  |
| 416A -> 438A | 0.13481  |
| 418A -> 437A | 0.12975  |
| 419A -> 438A | 0.29583  |
| 420A -> 437A | 0.10732  |
| 420A -> 438A | -0.27391 |
| 422A -> 438A | 0.15170  |
| 413B -> 437B | -0.17339 |
| 414B -> 437B | -0.19707 |
| 415B -> 438B | -0.11606 |
| 416B -> 437B | 0.30089  |
| 416B -> 438B | 0.13481  |
| 418B -> 437B | 0.12975  |
| 419B -> 438B | 0.29583  |
| 420B -> 437B | 0.10732  |
| 420B -> 438B | -0.27391 |
| 422B -> 438B | 0.15170  |

Excited State 126: 3.000-A 2.4137 eV 513.68 nm f=0.0000 <S\*\*2>=2.000

|              |          |
|--------------|----------|
| 393A -> 437A | -0.14395 |
| 412A -> 437A | 0.11733  |
| 420A -> 438A | 0.16189  |
| 422A -> 437A | -0.15530 |
| 422A -> 438A | -0.61200 |
| 393B -> 437B | 0.14395  |
| 412B -> 437B | -0.11733 |
| 420B -> 438B | -0.16189 |
| 422B -> 437B | 0.15530  |
| 422B -> 438B | 0.61200  |

Excited State 127: 3.000-A 2.4141 eV 513.58 nm f=0.0000 <S\*\*2>=2.000

|              |          |
|--------------|----------|
| 393A -> 437A | 0.27979  |
| 412A -> 437A | -0.22275 |
| 413A -> 437A | -0.16437 |
| 414A -> 437A | 0.10309  |
| 416A -> 437A | 0.11187  |

|              |          |
|--------------|----------|
| 419A -> 438A | 0.11081  |
| 420A -> 437A | 0.16980  |
| 420A -> 438A | -0.33345 |
| 422A -> 438A | -0.30054 |
| 393B -> 437B | -0.27979 |
| 412B -> 437B | 0.22275  |
| 413B -> 437B | 0.16437  |
| 414B -> 437B | -0.10309 |
| 416B -> 437B | -0.11187 |
| 419B -> 438B | -0.11081 |
| 420B -> 437B | -0.16980 |
| 420B -> 438B | 0.33345  |
| 422B -> 438B | 0.30054  |

Excited State 128: 1.000-A 2.4142 eV 513.55 nm  $f=0.0008$   $\langle S^{*2} \rangle=0.000$

|              |          |
|--------------|----------|
| 416A -> 437A | -0.10065 |
| 422A -> 437A | 0.15923  |
| 422A -> 438A | 0.66517  |
| 416B -> 437B | -0.10065 |
| 422B -> 437B | 0.15923  |
| 422B -> 438B | 0.66517  |

Excited State 129: 3.000-A 2.4387 eV 508.40 nm  $f=0.0000$   $\langle S^{*2} \rangle=2.000$

|              |          |
|--------------|----------|
| 393A -> 437A | -0.21176 |
| 410A -> 437A | -0.12405 |
| 412A -> 437A | 0.26841  |
| 413A -> 437A | 0.10604  |
| 415A -> 437A | -0.15226 |
| 416A -> 437A | 0.26722  |
| 417A -> 437A | -0.22881 |
| 417A -> 438A | 0.12540  |
| 418A -> 437A | 0.16816  |
| 419A -> 438A | 0.10628  |
| 420A -> 437A | 0.15218  |
| 420A -> 438A | -0.20241 |
| 393B -> 437B | 0.21176  |

|              |          |
|--------------|----------|
| 410B -> 437B | 0.12405  |
| 412B -> 437B | -0.26841 |
| 413B -> 437B | -0.10604 |
| 415B -> 437B | 0.15226  |
| 416B -> 437B | -0.26722 |
| 417B -> 437B | 0.22881  |
| 417B -> 438B | -0.12540 |
| 418B -> 437B | -0.16816 |
| 419B -> 438B | -0.10628 |
| 420B -> 437B | -0.15218 |
| 420B -> 438B | 0.20241  |

Excited State 130: 1.000-A 2.4446 eV 507.18 nm f=0.0045 <S\*\*2>=0.000

|              |          |
|--------------|----------|
| 410A -> 437A | -0.15536 |
| 411A -> 437A | -0.10214 |
| 414A -> 437A | 0.48646  |
| 416A -> 437A | 0.10033  |
| 417A -> 437A | -0.11676 |
| 418A -> 437A | -0.15540 |
| 420A -> 437A | 0.20119  |
| 420A -> 438A | -0.25559 |
| 410B -> 437B | -0.15536 |
| 411B -> 437B | -0.10214 |
| 414B -> 437B | 0.48646  |
| 416B -> 437B | 0.10033  |
| 417B -> 437B | -0.11676 |
| 418B -> 437B | -0.15540 |
| 420B -> 437B | 0.20119  |
| 420B -> 438B | -0.25559 |

Excited State 131: 1.000-A 2.4517 eV 505.70 nm f=0.0094 <S\*\*2>=0.000

|              |          |
|--------------|----------|
| 413A -> 439A | 0.12131  |
| 415A -> 439A | -0.13236 |
| 419A -> 439A | 0.61681  |
| 424A -> 439A | -0.18952 |
| 413B -> 439B | 0.12131  |

415B -> 439B -0.13236  
419B -> 439B 0.61681  
424B -> 439B -0.18952

Excited State 132: 1.000-A 2.4521 eV 505.63 nm  $f=0.0208$   $\langle S^{*2} \rangle = 0.000$

401A -> 437A 0.10464  
409A -> 437A 0.15607  
411A -> 437A -0.21872  
412A -> 437A 0.36505  
413A -> 437A 0.10321  
414A -> 437A 0.13930  
415A -> 438A -0.13777  
416A -> 438A 0.35593  
401B -> 437B 0.10464  
409B -> 437B 0.15607  
411B -> 437B -0.21872  
412B -> 437B 0.36505  
413B -> 437B 0.10321  
414B -> 437B 0.13930  
415B -> 438B -0.13777  
416B -> 438B 0.35593

Excited State 133: 3.000-A 2.4580 eV 504.40 nm  $f=0.0000$   $\langle S^{*2} \rangle = 2.000$

412A -> 437A -0.20033  
414A -> 437A -0.16322  
416A -> 437A -0.16904  
417A -> 438A 0.25263  
418A -> 437A 0.49539  
418A -> 438A -0.14761  
419A -> 437A -0.16449  
412B -> 437B 0.20033  
414B -> 437B 0.16322  
416B -> 437B 0.16904  
417B -> 438B -0.25263  
418B -> 437B -0.49539  
418B -> 438B 0.14761

419B -> 437B 0.16449

Excited State 134: 1.000-A 2.4610 eV 503.79 nm f=0.0006 <S\*\*2>=0.000

413A -> 437A 0.14484

415A -> 437A -0.11918

415A -> 438A 0.11122

417A -> 437A -0.13538

417A -> 438A 0.32876

418A -> 437A 0.46227

418A -> 438A -0.17098

419A -> 437A -0.12887

413B -> 437B 0.14484

415B -> 437B -0.11918

415B -> 438B 0.11122

417B -> 437B -0.13538

417B -> 438B 0.32876

418B -> 437B 0.46227

418B -> 438B -0.17098

419B -> 437B -0.12887

Excited State 135: 1.000-A 2.4707 eV 501.81 nm f=0.0010 <S\*\*2>=0.000

411A -> 437A -0.14006

416A -> 437A 0.20028

417A -> 437A 0.52614

418A -> 437A 0.18800

418A -> 438A 0.22901

411B -> 437B -0.14006

416B -> 437B 0.20028

417B -> 437B 0.52614

418B -> 437B 0.18800

418B -> 438B 0.22901

Excited State 136: 3.000-A 2.4724 eV 501.48 nm f=0.0000 <S\*\*2>=2.000

416A -> 437A 0.22428

416A -> 438A -0.10334

417A -> 437A 0.54652

|              |          |
|--------------|----------|
| 418A -> 437A | 0.20209  |
| 418A -> 438A | 0.21888  |
| 416B -> 437B | -0.22428 |
| 416B -> 438B | 0.10334  |
| 417B -> 437B | -0.54652 |
| 418B -> 437B | -0.20209 |
| 418B -> 438B | -0.21888 |

Excited State 137: 3.000-A 2.4755 eV 500.85 nm f=0.0000 <S\*\*2>=2.000

|              |          |
|--------------|----------|
| 396A -> 439A | 0.23912  |
| 397A -> 439A | -0.13637 |
| 399A -> 439A | -0.11744 |
| 400A -> 439A | 0.11094  |
| 409A -> 439A | -0.11942 |
| 416A -> 439A | 0.13348  |
| 417A -> 439A | -0.25991 |
| 418A -> 439A | -0.18444 |
| 419A -> 439A | -0.42404 |
| 396B -> 439B | -0.23912 |
| 397B -> 439B | 0.13637  |
| 399B -> 439B | 0.11744  |
| 400B -> 439B | -0.11094 |
| 409B -> 439B | 0.11942  |
| 416B -> 439B | -0.13348 |
| 417B -> 439B | 0.25991  |
| 418B -> 439B | 0.18444  |
| 419B -> 439B | 0.42404  |

Excited State 138: 1.000-A 2.4791 eV 500.11 nm f=0.0064 <S\*\*2>=0.000

|              |          |
|--------------|----------|
| 409A -> 437A | -0.11132 |
| 412A -> 437A | 0.49602  |
| 412A -> 438A | -0.10548 |
| 416A -> 437A | 0.17051  |
| 416A -> 438A | -0.28169 |
| 418A -> 437A | -0.17086 |
| 409B -> 437B | -0.11132 |



412B -> 437B 0.49602  
412B -> 438B -0.10548  
416B -> 437B 0.17051  
416B -> 438B -0.28169  
418B -> 437B -0.17086

Excited State 139: 3.000-A 2.4879 eV 498.35 nm  $f=0.0000$   $\langle S^{*2} \rangle = 2.000$

393A -> 437A 0.12726  
411A -> 440A 0.12155  
412A -> 440A 0.56953  
413A -> 440A 0.26016  
415A -> 440A 0.15023  
393B -> 437B -0.12726  
411B -> 440B -0.12155  
412B -> 440B -0.56953  
413B -> 440B -0.26016  
415B -> 440B -0.15023

Excited State 140: 1.000-A 2.4959 eV 496.76 nm  $f=0.0150$   $\langle S^{*2} \rangle = 0.000$

408A -> 439A -0.27268  
410A -> 439A -0.24636  
411A -> 439A 0.14429  
415A -> 439A 0.12977  
416A -> 439A -0.16199  
417A -> 439A 0.48140  
418A -> 439A 0.11996  
408B -> 439B -0.27268  
410B -> 439B -0.24636  
411B -> 439B 0.14429  
415B -> 439B 0.12977  
416B -> 439B -0.16199  
417B -> 439B 0.48140  
418B -> 439B 0.11996

Excited State 141: 3.000-A 2.5034 eV 495.27 nm  $f=0.0000$   $\langle S^{*2} \rangle = 2.000$

409A -> 437A -0.17440

414A -> 437A 0.40587  
414A -> 438A 0.12483  
416A -> 438A 0.33528  
418A -> 437A 0.17530  
418A -> 438A 0.11447  
409B -> 437B 0.17440  
414B -> 437B -0.40587  
414B -> 438B -0.12483  
416B -> 438B -0.33528  
418B -> 437B -0.17530  
418B -> 438B -0.11447

Excited State 142: 1.000-A 2.5116 eV 493.64 nm f=0.0129 <S\*\*2>=0.000

405A -> 438A 0.16827  
406A -> 438A -0.13498  
407A -> 438A -0.22325  
409A -> 437A 0.28367  
409A -> 438A 0.27769  
411A -> 437A -0.17410  
413A -> 438A -0.16478  
415A -> 438A 0.16112  
416A -> 438A -0.18937  
405B -> 438B 0.16827  
406B -> 438B -0.13498  
407B -> 438B -0.22325  
409B -> 437B 0.28367  
409B -> 438B 0.27769  
411B -> 437B -0.17410  
413B -> 438B -0.16478  
415B -> 438B 0.16112  
416B -> 438B -0.18937

Excited State 143: 3.000-A 2.5148 eV 493.02 nm f=0.0000 <S\*\*2>=2.000

408A -> 438A 0.12278  
409A -> 437A 0.22161  
409A -> 438A -0.11282

|              |          |
|--------------|----------|
| 410A -> 438A | -0.13759 |
| 411A -> 437A | -0.12203 |
| 414A -> 437A | -0.25815 |
| 414A -> 438A | 0.30808  |
| 416A -> 437A | 0.13648  |
| 416A -> 438A | 0.18306  |
| 417A -> 438A | -0.21231 |
| 419A -> 438A | 0.16680  |
| 408B -> 438B | -0.12278 |
| 409B -> 437B | -0.22161 |
| 409B -> 438B | 0.11282  |
| 410B -> 438B | 0.13759  |
| 411B -> 437B | 0.12203  |
| 414B -> 437B | 0.25815  |
| 414B -> 438B | -0.30808 |
| 416B -> 437B | -0.13648 |
| 416B -> 438B | -0.18306 |
| 417B -> 438B | 0.21231  |
| 419B -> 438B | -0.16680 |

Excited State 144: 3.000-A 2.5231 eV 491.39 nm f=0.0000 <S\*\*2>=2.000

|              |          |
|--------------|----------|
| 396A -> 439A | 0.21212  |
| 410A -> 439A | 0.15317  |
| 414A -> 439A | 0.12713  |
| 415A -> 439A | 0.14796  |
| 416A -> 439A | -0.12883 |
| 417A -> 439A | 0.28806  |
| 418A -> 439A | -0.39888 |
| 419A -> 439A | 0.16956  |
| 422A -> 439A | -0.14712 |
| 396B -> 439B | -0.21212 |
| 410B -> 439B | -0.15317 |
| 414B -> 439B | -0.12713 |
| 415B -> 439B | -0.14796 |
| 416B -> 439B | 0.12883  |
| 417B -> 439B | -0.28806 |

418B -> 439B 0.39888  
419B -> 439B -0.16956  
422B -> 439B 0.14712

Excited State 145: 1.000-A 2.5262 eV 490.80 nm f=0.0000 <S\*\*2>=0.000  
422A -> 439A 0.69602  
422B -> 439B 0.69602

Excited State 146: 3.000-A 2.5264 eV 490.76 nm f=0.0000 <S\*\*2>=2.000  
418A -> 439A 0.10983  
422A -> 439A -0.68489  
418B -> 439B -0.10983  
422B -> 439B 0.68489

Excited State 147: 1.000-A 2.5270 eV 490.64 nm f=0.0007 <S\*\*2>=0.000  
407A -> 437A -0.11853  
408A -> 437A 0.13544  
409A -> 438A 0.15065  
411A -> 437A 0.41553  
412A -> 437A 0.10793  
413A -> 437A 0.13417  
413A -> 438A -0.12506  
414A -> 437A 0.16040  
414A -> 438A 0.16671  
416A -> 438A 0.15624  
417A -> 437A 0.13464  
417A -> 438A -0.12518  
418A -> 437A 0.14012  
407B -> 437B -0.11853  
408B -> 437B 0.13544  
409B -> 438B 0.15065  
411B -> 437B 0.41553  
412B -> 437B 0.10793  
413B -> 437B 0.13417  
413B -> 438B -0.12506  
414B -> 437B 0.16040

414B -> 438B 0.16671  
416B -> 438B 0.15624  
417B -> 437B 0.13464  
417B -> 438B -0.12518  
418B -> 437B 0.14012

Excited State 148: 3.000-A 2.5302 eV 490.01 nm f=0.0000 <S\*\*2>=2.000

393A -> 437A 0.29207  
408A -> 437A 0.15736  
410A -> 437A -0.20713  
411A -> 437A 0.16441  
412A -> 437A 0.35026  
412A -> 440A -0.12901  
413A -> 437A 0.18534  
414A -> 437A -0.15386  
415A -> 437A 0.14987  
416A -> 438A 0.11103  
393B -> 437B -0.29207  
408B -> 437B -0.15736  
410B -> 437B 0.20713  
411B -> 437B -0.16441  
412B -> 437B -0.35026  
412B -> 440B 0.12901  
413B -> 437B -0.18534  
414B -> 437B 0.15386  
415B -> 437B -0.14987  
416B -> 438B -0.11103

Excited State 149: 1.000-A 2.5362 eV 488.85 nm f=0.0009 <S\*\*2>=0.000

408A -> 439A -0.16213  
410A -> 439A -0.19567  
414A -> 438A -0.13472  
417A -> 439A -0.36037  
418A -> 439A 0.46920  
408B -> 439B -0.16213  
410B -> 439B -0.19567

414B -> 438B -0.13472  
417B -> 439B -0.36037  
418B -> 439B 0.46920

Excited State 150: 1.000-A 2.5388 eV 488.36 nm f=0.0085 <S\*\*2>=0.000

408A -> 437A -0.14159  
410A -> 437A 0.20301  
414A -> 438A 0.40675  
415A -> 438A 0.14105  
416A -> 437A 0.11107  
417A -> 438A -0.21015  
417A -> 439A -0.11287  
418A -> 438A -0.11355  
418A -> 439A 0.17002  
419A -> 438A 0.10604  
408B -> 437B -0.14159  
410B -> 437B 0.20301  
414B -> 438B 0.40675  
415B -> 438B 0.14105  
416B -> 437B 0.11107  
417B -> 438B -0.21015  
417B -> 439B -0.11287  
418B -> 438B -0.11355  
418B -> 439B 0.17002  
419B -> 438B 0.10604

Excited State 151: 3.000-A 2.5401 eV 488.11 nm f=0.0000 <S\*\*2>=2.000

396A -> 439A 0.24741  
397A -> 439A -0.11635  
407A -> 439A 0.13731  
416A -> 439A -0.35160  
417A -> 439A -0.34924  
418A -> 439A 0.24925  
419A -> 439A 0.19352  
396B -> 439B -0.24741  
397B -> 439B 0.11635

407B -> 439B -0.13731  
416B -> 439B 0.35160  
417B -> 439B 0.34924  
418B -> 439B -0.24925  
419B -> 439B -0.19352

Excited State 152: 3.000-A 2.5522 eV 485.79 nm f=0.0000 <S\*\*2>=2.000

393A -> 437A -0.11181  
398A -> 437A -0.10088  
405A -> 437A -0.21414  
407A -> 437A -0.10152  
408A -> 437A 0.18315  
409A -> 437A 0.26198  
411A -> 437A 0.48547  
412A -> 437A -0.12856  
418A -> 438A 0.11854  
393B -> 437B 0.11181  
398B -> 437B 0.10088  
405B -> 437B 0.21414  
407B -> 437B 0.10152  
408B -> 437B -0.18315  
409B -> 437B -0.26198  
411B -> 437B -0.48547  
412B -> 437B 0.12856  
418B -> 438B -0.11854

Excited State 153: 1.000-A 2.5527 eV 485.70 nm f=0.0036 <S\*\*2>=0.000

401A -> 437A 0.15460  
402A -> 437A -0.14324  
405A -> 437A -0.11294  
408A -> 437A -0.12252  
409A -> 438A 0.11139  
410A -> 437A 0.36603  
411A -> 437A 0.16609  
414A -> 437A 0.23299  
414A -> 438A -0.10319

|              |          |
|--------------|----------|
| 415A -> 437A | -0.10974 |
| 417A -> 438A | 0.22843  |
| 418A -> 438A | 0.24079  |
| 401B -> 437B | 0.15460  |
| 402B -> 437B | -0.14324 |
| 405B -> 437B | -0.11294 |
| 408B -> 437B | -0.12252 |
| 409B -> 438B | 0.11139  |
| 410B -> 437B | 0.36603  |
| 411B -> 437B | 0.16609  |
| 414B -> 437B | 0.23299  |
| 414B -> 438B | -0.10319 |
| 415B -> 437B | -0.10974 |
| 417B -> 438B | 0.22843  |
| 418B -> 438B | 0.24079  |

Excited State 154: 1.000-A 2.5605 eV 484.23 nm f=0.0058 <S\*\*2>=0.000

|              |          |
|--------------|----------|
| 408A -> 439A | -0.17661 |
| 410A -> 439A | -0.19753 |
| 414A -> 439A | -0.13853 |
| 415A -> 439A | -0.19762 |
| 416A -> 439A | 0.57950  |
| 408B -> 439B | -0.17661 |
| 410B -> 439B | -0.19753 |
| 414B -> 439B | -0.13853 |
| 415B -> 439B | -0.19762 |
| 416B -> 439B | 0.57950  |

Excited State 155: 3.000-A 2.5611 eV 484.10 nm f=0.0000 <S\*\*2>=2.000

|              |          |
|--------------|----------|
| 395A -> 438A | 0.10368  |
| 406A -> 438A | -0.14183 |
| 408A -> 438A | 0.17691  |
| 409A -> 437A | -0.15697 |
| 409A -> 438A | -0.15861 |
| 411A -> 437A | -0.15367 |
| 413A -> 438A | 0.19331  |



|              |          |
|--------------|----------|
| 414A -> 437A | -0.11239 |
| 415A -> 438A | -0.22060 |
| 417A -> 437A | -0.12185 |
| 417A -> 438A | 0.27793  |
| 418A -> 437A | -0.14397 |
| 418A -> 438A | 0.25835  |
| 395B -> 438B | -0.10368 |
| 406B -> 438B | 0.14183  |
| 408B -> 438B | -0.17691 |
| 409B -> 437B | 0.15697  |
| 409B -> 438B | 0.15861  |
| 411B -> 437B | 0.15367  |
| 413B -> 438B | -0.19331 |
| 414B -> 437B | 0.11239  |
| 415B -> 438B | 0.22060  |
| 417B -> 437B | 0.12185  |
| 417B -> 438B | -0.27793 |
| 418B -> 437B | 0.14397  |
| 418B -> 438B | -0.25835 |

Excited State 156: 3.000-A 2.5706 eV 482.31 nm  $f=0.0000$   $\langle S^2 \rangle = 2.000$

|              |          |
|--------------|----------|
| 393A -> 437A | 0.16051  |
| 408A -> 437A | -0.17761 |
| 409A -> 437A | 0.21579  |
| 410A -> 437A | 0.28819  |
| 412A -> 437A | 0.16385  |
| 414A -> 438A | 0.12997  |
| 415A -> 438A | 0.10431  |
| 417A -> 437A | -0.13306 |
| 417A -> 438A | 0.27335  |
| 418A -> 438A | 0.28143  |
| 393B -> 437B | -0.16051 |
| 408B -> 437B | 0.17761  |
| 409B -> 437B | -0.21579 |
| 410B -> 437B | -0.28819 |
| 412B -> 437B | -0.16385 |

414B -> 438B -0.12997  
415B -> 438B -0.10431  
417B -> 437B 0.13306  
417B -> 438B -0.27335  
418B -> 438B -0.28143

Excited State 157: 3.000-A 2.5718 eV 482.10 nm  $f=0.0000$   $\langle S^{*2} \rangle = 2.000$

430A -> 440A -0.19082  
433A -> 440A -0.62308  
434A -> 440A -0.10801  
435A -> 440A 0.15063  
436A -> 440A -0.16977  
430B -> 440B 0.19082  
433B -> 440B 0.62308  
434B -> 440B 0.10801  
435B -> 440B -0.15063  
436B -> 440B 0.16977

Excited State 158: 1.000-A 2.5727 eV 481.92 nm  $f=0.0025$   $\langle S^{*2} \rangle = 0.000$

402A -> 437A 0.12296  
408A -> 437A 0.10479  
408A -> 438A 0.10899  
409A -> 437A 0.39557  
409A -> 438A -0.11275  
414A -> 437A -0.11622  
414A -> 438A 0.24604  
416A -> 438A 0.11099  
417A -> 437A -0.10490  
417A -> 438A 0.20079  
418A -> 438A 0.26619  
402B -> 437B 0.12296  
408B -> 437B 0.10479  
408B -> 438B 0.10899  
409B -> 437B 0.39557  
409B -> 438B -0.11275  
414B -> 437B -0.11622

414B -> 438B 0.24604  
416B -> 438B 0.11099  
417B -> 437B -0.10490  
417B -> 438B 0.20079  
418B -> 438B 0.26619

Excited State 159: 1.000-A 2.5772 eV 481.08 nm f=0.0086 <S\*\*2>=0.000

405A -> 437A -0.16312  
409A -> 437A 0.37555  
409A -> 438A -0.13741  
411A -> 437A 0.28360  
413A -> 438A 0.10513  
414A -> 438A -0.19272  
415A -> 438A -0.10342  
416A -> 438A -0.15287  
417A -> 438A -0.13672  
418A -> 438A -0.25800  
405B -> 437B -0.16312  
409B -> 437B 0.37555  
409B -> 438B -0.13741  
411B -> 437B 0.28360  
413B -> 438B 0.10513  
414B -> 438B -0.19272  
415B -> 438B -0.10342  
416B -> 438B -0.15287  
417B -> 438B -0.13672  
418B -> 438B -0.25800

Excited State 160: 3.000-A 2.5831 eV 479.99 nm f=0.0000 <S\*\*2>=2.000

393A -> 437A 0.10872  
408A -> 437A -0.11183  
409A -> 438A -0.18540  
410A -> 437A 0.28950  
413A -> 437A 0.12000  
413A -> 438A 0.22288  
414A -> 437A 0.12849

|              |          |
|--------------|----------|
| 414A -> 438A | -0.10135 |
| 415A -> 437A | -0.11392 |
| 415A -> 438A | -0.27280 |
| 416A -> 438A | -0.13453 |
| 418A -> 438A | -0.24790 |
| 393B -> 437B | -0.10872 |
| 408B -> 437B | 0.11183  |
| 409B -> 438B | 0.18540  |
| 410B -> 437B | -0.28950 |
| 413B -> 437B | -0.12000 |
| 413B -> 438B | -0.22288 |
| 414B -> 437B | -0.12849 |
| 414B -> 438B | 0.10135  |
| 415B -> 437B | 0.11392  |
| 415B -> 438B | 0.27280  |
| 416B -> 438B | 0.13453  |
| 418B -> 438B | 0.24790  |

Excited State 161: 1.000-A 2.5840 eV 479.81 nm f=0.0004 <S\*\*2>=0.000

|              |          |
|--------------|----------|
| 430A -> 440A | 0.17053  |
| 433A -> 440A | 0.63565  |
| 434A -> 440A | 0.13250  |
| 435A -> 440A | -0.14344 |
| 436A -> 440A | 0.15319  |
| 430B -> 440B | 0.17053  |
| 433B -> 440B | 0.63565  |
| 434B -> 440B | 0.13250  |
| 435B -> 440B | -0.14344 |
| 436B -> 440B | 0.15319  |

Excited State 162: 3.000-A 2.5948 eV 477.82 nm f=0.0000 <S\*\*2>=2.000

|              |          |
|--------------|----------|
| 396A -> 439A | -0.16047 |
| 406A -> 439A | 0.11635  |
| 407A -> 439A | -0.20736 |
| 409A -> 439A | -0.26826 |
| 414A -> 439A | 0.32721  |

|              |          |
|--------------|----------|
| 416A -> 439A | -0.40870 |
| 419A -> 439A | -0.15348 |
| 396B -> 439B | 0.16047  |
| 406B -> 439B | -0.11635 |
| 407B -> 439B | 0.20736  |
| 409B -> 439B | 0.26826  |
| 414B -> 439B | -0.32721 |
| 416B -> 439B | 0.40870  |
| 419B -> 439B | 0.15348  |

Excited State 163: 1.000-A 2.5990 eV 477.05 nm  $f=0.0237$   $\langle S^{*2} \rangle=0.000$

|              |          |
|--------------|----------|
| 408A -> 439A | -0.10847 |
| 411A -> 439A | 0.11999  |
| 414A -> 439A | 0.59577  |
| 416A -> 439A | 0.13522  |
| 436A -> 444A | -0.14166 |
| 408B -> 439B | -0.10847 |
| 411B -> 439B | 0.11999  |
| 414B -> 439B | 0.59577  |
| 416B -> 439B | 0.13522  |
| 436B -> 444B | -0.14166 |

Excited State 164: 1.000-A 2.6041 eV 476.11 nm  $f=0.0006$   $\langle S^{*2} \rangle=0.000$

|              |          |
|--------------|----------|
| 397A -> 437A | -0.10905 |
| 398A -> 437A | 0.28721  |
| 400A -> 437A | 0.10085  |
| 401A -> 437A | -0.28804 |
| 402A -> 437A | 0.17200  |
| 407A -> 437A | -0.17448 |
| 410A -> 437A | 0.34987  |
| 411A -> 437A | -0.11893 |
| 412A -> 437A | 0.14066  |
| 413A -> 437A | 0.10520  |
| 418A -> 438A | -0.10894 |
| 397B -> 437B | -0.10905 |
| 398B -> 437B | 0.28721  |

400B -> 437B 0.10085  
401B -> 437B -0.28804  
402B -> 437B 0.17200  
407B -> 437B -0.17448  
410B -> 437B 0.34987  
411B -> 437B -0.11893  
412B -> 437B 0.14066  
413B -> 437B 0.10520  
418B -> 438B -0.10894

Excited State 165: 3.000-A 2.6163 eV 473.90 nm f=0.0000 <S\*\*2>=2.000

433A -> 440A -0.12570  
434A -> 440A 0.66446  
435A -> 440A -0.15586  
433B -> 440B 0.12570  
434B -> 440B -0.66446  
435B -> 440B 0.15586

Excited State 166: 1.000-A 2.6163 eV 473.89 nm f=0.0000 <S\*\*2>=0.000

433A -> 440A -0.14875  
434A -> 440A 0.66174  
435A -> 440A -0.15345  
433B -> 440B -0.14875  
434B -> 440B 0.66174  
435B -> 440B -0.15345

Excited State 167: 1.000-A 2.6337 eV 470.76 nm f=0.0056 <S\*\*2>=0.000

402A -> 437A 0.11594  
405A -> 438A -0.15759  
406A -> 438A 0.14244  
407A -> 437A 0.23288  
407A -> 438A 0.18097  
408A -> 437A -0.21831  
408A -> 438A -0.12562  
413A -> 438A -0.19813  
414A -> 438A -0.24487

|              |          |
|--------------|----------|
| 415A -> 438A | 0.34761  |
| 402B -> 437B | 0.11594  |
| 405B -> 438B | -0.15759 |
| 406B -> 438B | 0.14244  |
| 407B -> 437B | 0.23288  |
| 407B -> 438B | 0.18097  |
| 408B -> 437B | -0.21831 |
| 408B -> 438B | -0.12562 |
| 413B -> 438B | -0.19813 |
| 414B -> 438B | -0.24487 |
| 415B -> 438B | 0.34761  |

Excited State 168: 1.000-A 2.6439 eV 468.95 nm  $f=0.0093$   $\langle S^{*2} \rangle = 0.000$

|              |          |
|--------------|----------|
| 393A -> 437A | 0.10984  |
| 402A -> 437A | 0.16016  |
| 405A -> 437A | 0.34402  |
| 406A -> 437A | -0.14307 |
| 407A -> 437A | 0.26245  |
| 408A -> 437A | -0.21238 |
| 414A -> 438A | 0.16777  |
| 415A -> 438A | -0.23417 |
| 393B -> 437B | 0.10984  |
| 402B -> 437B | 0.16016  |
| 405B -> 437B | 0.34402  |
| 406B -> 437B | -0.14307 |
| 407B -> 437B | 0.26245  |
| 408B -> 437B | -0.21238 |
| 414B -> 438B | 0.16777  |
| 415B -> 438B | -0.23417 |

Excited State 169: 3.000-A 2.6456 eV 468.64 nm  $f=0.0000$   $\langle S^{*2} \rangle = 2.000$

|              |          |
|--------------|----------|
| 400A -> 438A | 0.11640  |
| 406A -> 437A | 0.12023  |
| 407A -> 438A | 0.12941  |
| 408A -> 437A | 0.17445  |
| 408A -> 438A | -0.10483 |

|              |          |
|--------------|----------|
| 409A -> 438A | 0.12297  |
| 410A -> 437A | 0.10045  |
| 410A -> 438A | 0.30522  |
| 414A -> 438A | 0.35295  |
| 415A -> 438A | -0.27850 |
| 400B -> 438B | -0.11640 |
| 406B -> 437B | -0.12023 |
| 407B -> 438B | -0.12941 |
| 408B -> 437B | -0.17445 |
| 408B -> 438B | 0.10483  |
| 409B -> 438B | -0.12297 |
| 410B -> 437B | -0.10045 |
| 410B -> 438B | -0.30522 |
| 414B -> 438B | -0.35295 |
| 415B -> 438B | 0.27850  |

Excited State 170: 3.000-A 2.6479 eV 468.23 nm f=0.0000 <S\*\*2>=2.000

|              |          |
|--------------|----------|
| 397A -> 437A | -0.11021 |
| 402A -> 437A | -0.15159 |
| 405A -> 437A | 0.32122  |
| 406A -> 437A | 0.14513  |
| 407A -> 437A | 0.36165  |
| 409A -> 437A | 0.17517  |
| 410A -> 437A | -0.17838 |
| 415A -> 438A | -0.13629 |
| 397B -> 437B | 0.11021  |
| 402B -> 437B | 0.15159  |
| 405B -> 437B | -0.32122 |
| 406B -> 437B | -0.14513 |
| 407B -> 437B | -0.36165 |
| 409B -> 437B | -0.17517 |
| 410B -> 437B | 0.17838  |
| 415B -> 438B | 0.13629  |

Excited State 171: 1.000-A 2.6517 eV 467.57 nm f=0.0164 <S\*\*2>=0.000

|              |         |
|--------------|---------|
| 395A -> 438A | 0.10719 |
|--------------|---------|



|              |          |
|--------------|----------|
| 401A -> 437A | 0.11772  |
| 405A -> 437A | 0.26759  |
| 406A -> 437A | 0.16697  |
| 407A -> 437A | 0.16065  |
| 408A -> 437A | 0.29288  |
| 408A -> 438A | 0.13907  |
| 410A -> 437A | 0.15228  |
| 410A -> 438A | 0.30515  |
| 417A -> 438A | -0.12903 |
| 395B -> 438B | 0.10719  |
| 401B -> 437B | 0.11772  |
| 405B -> 437B | 0.26759  |
| 406B -> 437B | 0.16697  |
| 407B -> 437B | 0.16065  |
| 408B -> 437B | 0.29288  |
| 408B -> 438B | 0.13907  |
| 410B -> 437B | 0.15228  |
| 410B -> 438B | 0.30515  |
| 417B -> 438B | -0.12903 |

Excited State 172: 3.000-A 2.6574 eV 466.57 nm  $f=0.0000$   $\langle S^2 \rangle=2.000$

|              |          |
|--------------|----------|
| 430A -> 441A | 0.10886  |
| 430A -> 442A | 0.20234  |
| 433A -> 441A | 0.18317  |
| 433A -> 442A | 0.30729  |
| 435A -> 442A | 0.15936  |
| 436A -> 441A | -0.20195 |
| 436A -> 442A | -0.32480 |
| 430B -> 441B | -0.10886 |
| 430B -> 442B | -0.20234 |
| 433B -> 441B | -0.18317 |
| 433B -> 442B | -0.30729 |
| 435B -> 442B | -0.15936 |
| 436B -> 441B | 0.20195  |
| 436B -> 442B | 0.32480  |

Excited State 173: 3.000-A 2.6668 eV 464.91 nm  $f=0.0000$   $\langle S^{*2} \rangle = 2.000$

|              |          |
|--------------|----------|
| 401A -> 439A | -0.12960 |
| 408A -> 439A | -0.16532 |
| 409A -> 439A | 0.11974  |
| 410A -> 439A | 0.25478  |
| 411A -> 439A | 0.26458  |
| 413A -> 439A | 0.22916  |
| 414A -> 439A | -0.23081 |
| 415A -> 439A | -0.32187 |
| 416A -> 439A | -0.15787 |
| 401B -> 439B | 0.12960  |
| 408B -> 439B | 0.16532  |
| 409B -> 439B | -0.11974 |
| 410B -> 439B | -0.25478 |
| 411B -> 439B | -0.26458 |
| 413B -> 439B | -0.22916 |
| 414B -> 439B | 0.23081  |
| 415B -> 439B | 0.32187  |
| 416B -> 439B | 0.15787  |

Excited State 174: 1.000-A 2.6698 eV 464.39 nm  $f=0.0080$   $\langle S^{*2} \rangle = 0.000$

|              |          |
|--------------|----------|
| 401A -> 437A | -0.15084 |
| 402A -> 437A | -0.24739 |
| 405A -> 437A | 0.14208  |
| 406A -> 437A | 0.48888  |
| 406A -> 438A | -0.10249 |
| 408A -> 438A | -0.17252 |
| 415A -> 438A | -0.10358 |
| 401B -> 437B | -0.15084 |
| 402B -> 437B | -0.24739 |
| 405B -> 437B | 0.14208  |
| 406B -> 437B | 0.48888  |
| 406B -> 438B | -0.10249 |
| 408B -> 438B | -0.17252 |
| 415B -> 438B | -0.10358 |

Excited State 175: 3.000-A 2.6702 eV 464.32 nm  $f=0.0000$   $\langle S^{*2} \rangle = 2.000$

|              |          |
|--------------|----------|
| 397A -> 437A | 0.10359  |
| 405A -> 437A | 0.16901  |
| 406A -> 437A | 0.42207  |
| 406A -> 438A | -0.14940 |
| 408A -> 437A | 0.28247  |
| 410A -> 437A | 0.19518  |
| 414A -> 438A | -0.17317 |
| 415A -> 438A | 0.18464  |
| 397B -> 437B | -0.10359 |
| 405B -> 437B | -0.16901 |
| 406B -> 437B | -0.42207 |
| 406B -> 438B | 0.14940  |
| 408B -> 437B | -0.28247 |
| 410B -> 437B | -0.19518 |
| 414B -> 438B | 0.17317  |
| 415B -> 438B | -0.18464 |

Excited State 176: 1.000-A 2.6854 eV 461.70 nm  $f=0.0108$   $\langle S^{*2} \rangle = 0.000$

|              |          |
|--------------|----------|
| 405A -> 437A | -0.12264 |
| 407A -> 438A | 0.13368  |
| 407A -> 439A | 0.13357  |
| 409A -> 438A | 0.14826  |
| 409A -> 439A | 0.38043  |
| 410A -> 438A | 0.17250  |
| 411A -> 439A | 0.12877  |
| 413A -> 438A | -0.10404 |
| 413A -> 439A | -0.19527 |
| 414A -> 439A | -0.17359 |
| 415A -> 438A | -0.12936 |
| 415A -> 439A | 0.18608  |
| 416A -> 439A | 0.11684  |
| 419A -> 439A | 0.10351  |
| 405B -> 437B | -0.12264 |
| 407B -> 438B | 0.13368  |
| 407B -> 439B | 0.13357  |

|              |          |
|--------------|----------|
| 409B -> 438B | 0.14826  |
| 409B -> 439B | 0.38043  |
| 410B -> 438B | 0.17250  |
| 411B -> 439B | 0.12877  |
| 413B -> 438B | -0.10404 |
| 413B -> 439B | -0.19527 |
| 414B -> 439B | -0.17359 |
| 415B -> 438B | -0.12936 |
| 415B -> 439B | 0.18608  |
| 416B -> 439B | 0.11684  |
| 419B -> 439B | 0.10351  |

Excited State 177: 3.000-A 2.6855 eV 461.68 nm  $f=0.0000$   $\langle S^{*2} \rangle = 2.000$

|              |          |
|--------------|----------|
| 406A -> 437A | -0.29027 |
| 407A -> 437A | 0.21118  |
| 408A -> 437A | 0.32101  |
| 408A -> 438A | 0.24149  |
| 410A -> 437A | 0.14829  |
| 410A -> 438A | 0.19240  |
| 411A -> 438A | -0.14526 |
| 417A -> 438A | -0.12983 |
| 406B -> 437B | 0.29027  |
| 407B -> 437B | -0.21118 |
| 408B -> 437B | -0.32101 |
| 408B -> 438B | -0.24149 |
| 410B -> 437B | -0.14829 |
| 410B -> 438B | -0.19240 |
| 411B -> 438B | 0.14526  |
| 417B -> 438B | 0.12983  |

Excited State 178: 1.000-A 2.6895 eV 460.99 nm  $f=0.0270$   $\langle S^{*2} \rangle = 0.000$

|              |          |
|--------------|----------|
| 405A -> 437A | 0.16400  |
| 407A -> 438A | -0.20523 |
| 408A -> 438A | 0.10780  |
| 409A -> 438A | -0.21867 |
| 409A -> 439A | 0.25272  |

|              |          |
|--------------|----------|
| 410A -> 438A | -0.23681 |
| 412A -> 438A | -0.15052 |
| 413A -> 438A | 0.17970  |
| 413A -> 439A | -0.13433 |
| 415A -> 438A | 0.23668  |
| 415A -> 439A | 0.11228  |
| 405B -> 437B | 0.16400  |
| 407B -> 438B | -0.20523 |
| 408B -> 438B | 0.10780  |
| 409B -> 438B | -0.21867 |
| 409B -> 439B | 0.25272  |
| 410B -> 438B | -0.23681 |
| 412B -> 438B | -0.15052 |
| 413B -> 438B | 0.17970  |
| 413B -> 439B | -0.13433 |
| 415B -> 438B | 0.23668  |
| 415B -> 439B | 0.11228  |

Excited State 179: 3.000-A 2.7066 eV 458.08 nm  $f=0.0000$   $\langle S^2 \rangle=2.000$

|              |          |
|--------------|----------|
| 400A -> 438A | -0.10634 |
| 409A -> 438A | 0.12968  |
| 410A -> 438A | -0.28896 |
| 411A -> 438A | -0.28547 |
| 412A -> 438A | 0.16749  |
| 413A -> 438A | -0.28643 |
| 415A -> 438A | -0.28135 |
| 416A -> 438A | -0.19167 |
| 400B -> 438B | 0.10634  |
| 409B -> 438B | -0.12968 |
| 410B -> 438B | 0.28896  |
| 411B -> 438B | 0.28547  |
| 412B -> 438B | -0.16749 |
| 413B -> 438B | 0.28643  |
| 415B -> 438B | 0.28135  |
| 416B -> 438B | 0.19167  |

Excited State 180: 1.000-A 2.7097 eV 457.56 nm  $f=0.0034$   $\langle S^{*2} \rangle=0.000$

|              |          |
|--------------|----------|
| 408A -> 437A | -0.12072 |
| 408A -> 439A | -0.11730 |
| 409A -> 439A | 0.12965  |
| 410A -> 439A | 0.15776  |
| 411A -> 439A | 0.37955  |
| 412A -> 439A | -0.12420 |
| 413A -> 439A | 0.23408  |
| 415A -> 439A | -0.32092 |
| 416A -> 439A | -0.10187 |
| 408B -> 437B | -0.12072 |
| 408B -> 439B | -0.11730 |
| 409B -> 439B | 0.12965  |
| 410B -> 439B | 0.15776  |
| 411B -> 439B | 0.37955  |
| 412B -> 439B | -0.12420 |
| 413B -> 439B | 0.23408  |
| 415B -> 439B | -0.32092 |
| 416B -> 439B | -0.10187 |

Excited State 181: 1.000-A 2.7114 eV 457.27 nm  $f=0.0085$   $\langle S^{*2} \rangle=0.000$

|              |          |
|--------------|----------|
| 395A -> 438A | -0.12924 |
| 403A -> 437A | 0.16220  |
| 403A -> 438A | 0.14117  |
| 406A -> 438A | -0.19441 |
| 407A -> 437A | 0.12829  |
| 407A -> 438A | 0.22723  |
| 408A -> 437A | 0.32183  |
| 410A -> 437A | 0.18437  |
| 410A -> 438A | -0.17483 |
| 411A -> 439A | 0.16064  |
| 415A -> 439A | -0.12969 |
| 395B -> 438B | -0.12924 |
| 403B -> 437B | 0.16220  |
| 403B -> 438B | 0.14117  |
| 406B -> 438B | -0.19441 |

|              |          |
|--------------|----------|
| 407B -> 437B | 0.12829  |
| 407B -> 438B | 0.22723  |
| 408B -> 437B | 0.32183  |
| 410B -> 437B | 0.18437  |
| 410B -> 438B | -0.17483 |
| 411B -> 439B | 0.16064  |
| 415B -> 439B | -0.12969 |

Excited State 182: 1.000-A 2.7199 eV 455.85 nm  $f=0.0036$   $\langle S^{*2} \rangle = 0.000$

|              |          |
|--------------|----------|
| 407A -> 438A | 0.11814  |
| 410A -> 438A | 0.30368  |
| 411A -> 438A | 0.37858  |
| 412A -> 438A | -0.17072 |
| 413A -> 438A | 0.27910  |
| 415A -> 438A | 0.20341  |
| 416A -> 438A | 0.12642  |
| 407B -> 438B | 0.11814  |
| 410B -> 438B | 0.30368  |
| 411B -> 438B | 0.37858  |
| 412B -> 438B | -0.17072 |
| 413B -> 438B | 0.27910  |
| 415B -> 438B | 0.20341  |
| 416B -> 438B | 0.12642  |

Excited State 183: 3.000-A 2.7225 eV 455.40 nm  $f=0.0000$   $\langle S^{*2} \rangle = 2.000$

|              |          |
|--------------|----------|
| 403A -> 437A | 0.15085  |
| 409A -> 438A | 0.23333  |
| 410A -> 438A | -0.12127 |
| 411A -> 438A | -0.27097 |
| 412A -> 438A | -0.11157 |
| 413A -> 438A | 0.38893  |
| 415A -> 438A | 0.15278  |
| 434A -> 441A | -0.11506 |
| 435A -> 441A | -0.15717 |
| 435A -> 443A | 0.13559  |
| 403B -> 437B | -0.15085 |

409B -> 438B -0.23333  
410B -> 438B 0.12127  
411B -> 438B 0.27097  
412B -> 438B 0.11157  
413B -> 438B -0.38893  
415B -> 438B -0.15278  
434B -> 441B 0.11506  
435B -> 441B 0.15717  
435B -> 443B -0.13559

Excited State 184: 1.000-A 2.7228 eV 455.35 nm f=0.0171 <S\*\*2>=0.000

397A -> 437A -0.11222  
398A -> 437A 0.17652  
402A -> 437A -0.27681  
403A -> 437A -0.23022  
406A -> 437A -0.17330  
407A -> 437A 0.30460  
408A -> 438A 0.19627  
411A -> 438A -0.20717  
413A -> 438A 0.15475  
397B -> 437B -0.11222  
398B -> 437B 0.17652  
402B -> 437B -0.27681  
403B -> 437B -0.23022  
406B -> 437B -0.17330  
407B -> 437B 0.30460  
408B -> 438B 0.19627  
411B -> 438B -0.20717  
413B -> 438B 0.15475

Excited State 185: 3.000-A 2.7245 eV 455.07 nm f=0.0000 <S\*\*2>=2.000

411A -> 438A 0.17428  
413A -> 438A -0.13062  
434A -> 441A -0.26815  
434A -> 442A 0.10916  
435A -> 441A -0.43243



435A -> 442A 0.16900  
436A -> 441A -0.20412  
411B -> 438B -0.17428  
413B -> 438B 0.13062  
434B -> 441B 0.26815  
434B -> 442B -0.10916  
435B -> 441B 0.43243  
435B -> 442B -0.16900  
436B -> 441B 0.20412

Excited State 186: 3.000-A 2.7297 eV 454.21 nm f=0.0000 <S\*\*2>=2.000

400A -> 437A -0.24534  
403A -> 437A 0.47000  
405A -> 437A 0.28342  
407A -> 437A -0.15727  
409A -> 437A 0.12079  
413A -> 438A -0.13916  
400B -> 437B 0.24534  
403B -> 437B -0.47000  
405B -> 437B -0.28342  
407B -> 437B 0.15727  
409B -> 437B -0.12079  
413B -> 438B 0.13916

Excited State 187: 1.000-A 2.7349 eV 453.34 nm f=0.0067 <S\*\*2>=0.000

402A -> 437A 0.13109  
408A -> 438A -0.13029  
409A -> 438A 0.31933  
411A -> 438A -0.33248  
413A -> 438A 0.37034  
415A -> 438A 0.10133  
402B -> 437B 0.13109  
408B -> 438B -0.13029  
409B -> 438B 0.31933  
411B -> 438B -0.33248  
413B -> 438B 0.37034

415B -> 438B 0.10133

Excited State 188: 3.000-A 2.7363 eV 453.11 nm f=0.0000 <S\*\*2>=2.000

408A -> 439A -0.31082

409A -> 439A 0.10297

410A -> 439A 0.18558

411A -> 439A -0.43555

412A -> 439A 0.23916

413A -> 439A -0.20974

415A -> 439A -0.10705

416A -> 439A -0.10348

408B -> 439B 0.31082

409B -> 439B -0.10297

410B -> 439B -0.18558

411B -> 439B 0.43555

412B -> 439B -0.23916

413B -> 439B 0.20974

415B -> 439B 0.10705

416B -> 439B 0.10348

Excited State 189: 3.000-A 2.7454 eV 451.61 nm f=0.0000 <S\*\*2>=2.000

400A -> 437A 0.10499

400A -> 438A 0.17436

403A -> 437A 0.12401

406A -> 437A 0.15291

408A -> 437A -0.15601

409A -> 438A -0.20978

410A -> 438A 0.11802

411A -> 438A -0.36537

412A -> 438A 0.15169

434A -> 443A 0.15833

435A -> 443A -0.23939

436A -> 443A -0.12248

400B -> 437B -0.10499

400B -> 438B -0.17436

403B -> 437B -0.12401

|              |          |
|--------------|----------|
| 406B -> 437B | -0.15291 |
| 408B -> 437B | 0.15601  |
| 409B -> 438B | 0.20978  |
| 410B -> 438B | -0.11802 |
| 411B -> 438B | 0.36537  |
| 412B -> 438B | -0.15169 |
| 434B -> 443B | -0.15833 |
| 435B -> 443B | 0.23939  |
| 436B -> 443B | 0.12248  |

Excited State 190: 1.000-A 2.7459 eV 451.53 nm f=0.0044 <S\*\*2>=0.000

|              |          |
|--------------|----------|
| 400A -> 437A | -0.24631 |
| 402A -> 437A | -0.10484 |
| 403A -> 437A | 0.42867  |
| 405A -> 437A | 0.21510  |
| 408A -> 437A | -0.16344 |
| 408A -> 438A | 0.15469  |
| 410A -> 438A | 0.11551  |
| 411A -> 438A | -0.14434 |
| 400B -> 437B | -0.24631 |
| 402B -> 437B | -0.10484 |
| 403B -> 437B | 0.42867  |
| 405B -> 437B | 0.21510  |
| 408B -> 437B | -0.16344 |
| 408B -> 438B | 0.15469  |
| 410B -> 438B | 0.11551  |
| 411B -> 438B | -0.14434 |

Excited State 191: 1.000-A 2.7507 eV 450.73 nm f=0.0029 <S\*\*2>=0.000

|              |          |
|--------------|----------|
| 408A -> 439A | 0.37809  |
| 409A -> 439A | -0.15923 |
| 410A -> 439A | -0.16387 |
| 411A -> 439A | 0.33573  |
| 412A -> 439A | -0.21706 |
| 413A -> 439A | 0.17283  |
| 415A -> 439A | 0.24414  |

416A -> 439A 0.12788  
408B -> 439B 0.37809  
409B -> 439B -0.15923  
410B -> 439B -0.16387  
411B -> 439B 0.33573  
412B -> 439B -0.21706  
413B -> 439B 0.17283  
415B -> 439B 0.24414  
416B -> 439B 0.12788

Excited State 192: 3.000-A 2.7570 eV 449.71 nm f=0.0000 <S\*\*2>=2.000

400A -> 437A 0.12312  
400A -> 438A 0.16183  
404A -> 437A 0.25171  
406A -> 438A 0.11030  
407A -> 438A -0.12496  
408A -> 437A 0.18899  
408A -> 438A -0.22507  
409A -> 438A -0.27217  
434A -> 443A -0.14964  
435A -> 443A 0.23966  
436A -> 443A 0.14330  
400B -> 437B -0.12312  
400B -> 438B -0.16183  
404B -> 437B -0.25171  
406B -> 438B -0.11030  
407B -> 438B 0.12496  
408B -> 437B -0.18899  
408B -> 438B 0.22507  
409B -> 438B 0.27217  
434B -> 443B 0.14964  
435B -> 443B -0.23966  
436B -> 443B -0.14330

Excited State 193: 3.000-A 2.7590 eV 449.38 nm f=0.0000 <S\*\*2>=2.000

399A -> 437A 0.10963

|              |          |
|--------------|----------|
| 400A -> 437A | 0.12856  |
| 402A -> 437A | 0.15424  |
| 403A -> 437A | 0.31545  |
| 404A -> 437A | 0.21969  |
| 405A -> 437A | -0.27125 |
| 406A -> 437A | 0.25200  |
| 406A -> 438A | -0.10668 |
| 407A -> 437A | 0.16835  |
| 408A -> 438A | 0.13072  |
| 410A -> 438A | 0.10774  |
| 411A -> 438A | 0.13183  |
| 399B -> 437B | -0.10963 |
| 400B -> 437B | -0.12856 |
| 402B -> 437B | -0.15424 |
| 403B -> 437B | -0.31545 |
| 404B -> 437B | -0.21969 |
| 405B -> 437B | 0.27125  |
| 406B -> 437B | -0.25200 |
| 406B -> 438B | 0.10668  |
| 407B -> 437B | -0.16835 |
| 408B -> 438B | -0.13072 |
| 410B -> 438B | -0.10774 |
| 411B -> 438B | -0.13183 |

Excited State 194: 3.000-A 2.7639 eV 448.58 nm  $f=0.0000$   $\langle S^2 \rangle=2.000$

|              |          |
|--------------|----------|
| 404A -> 437A | -0.13539 |
| 407A -> 439A | -0.33442 |
| 408A -> 438A | 0.11442  |
| 409A -> 439A | 0.14003  |
| 410A -> 438A | 0.11540  |
| 410A -> 439A | 0.18594  |
| 413A -> 439A | -0.13026 |
| 415A -> 439A | 0.23114  |
| 435A -> 443A | 0.10286  |
| 436A -> 443A | 0.11511  |
| 436A -> 444A | -0.23259 |

|              |          |
|--------------|----------|
| 404B -> 437B | 0.13539  |
| 407B -> 439B | 0.33442  |
| 408B -> 438B | -0.11442 |
| 409B -> 439B | -0.14003 |
| 410B -> 438B | -0.11540 |
| 410B -> 439B | -0.18594 |
| 413B -> 439B | 0.13026  |
| 415B -> 439B | -0.23114 |
| 435B -> 443B | -0.10286 |
| 436B -> 443B | -0.11511 |
| 436B -> 444B | 0.23259  |

Excited State 195: 3.000-A 2.7650 eV 448.41 nm f=0.0000 <S\*\*2>=2.000

|              |          |
|--------------|----------|
| 404A -> 437A | 0.10671  |
| 407A -> 439A | -0.25244 |
| 408A -> 437A | 0.13101  |
| 408A -> 438A | -0.15094 |
| 409A -> 438A | 0.10064  |
| 410A -> 438A | -0.14360 |
| 410A -> 439A | 0.14888  |
| 415A -> 439A | 0.21135  |
| 434A -> 443A | 0.11749  |
| 435A -> 443A | -0.18342 |
| 436A -> 443A | -0.15987 |
| 436A -> 444A | 0.22070  |
| 404B -> 437B | -0.10671 |
| 407B -> 439B | 0.25244  |
| 408B -> 437B | -0.13101 |
| 408B -> 438B | 0.15094  |
| 409B -> 438B | -0.10064 |
| 410B -> 438B | 0.14360  |
| 410B -> 439B | -0.14888 |
| 415B -> 439B | -0.21135 |
| 434B -> 443B | -0.11749 |
| 435B -> 443B | 0.18342  |
| 436B -> 443B | 0.15987  |

436B -> 444B -0.22070

Excited State 196: 1.000-A 2.7655 eV 448.32 nm f=0.0009 <S\*\*2>=0.000

400A -> 437A 0.21376

402A -> 437A 0.16735

402A -> 438A -0.10566

403A -> 437A 0.22383

404A -> 437A 0.22701

405A -> 437A -0.22003

405A -> 438A 0.10983

406A -> 437A 0.25588

406A -> 438A -0.14888

407A -> 437A 0.13230

408A -> 437A -0.12242

408A -> 438A 0.14753

410A -> 437A -0.10134

410A -> 438A 0.19608

400B -> 437B 0.21376

402B -> 437B 0.16735

402B -> 438B -0.10566

403B -> 437B 0.22383

404B -> 437B 0.22701

405B -> 437B -0.22003

405B -> 438B 0.10983

406B -> 437B 0.25588

406B -> 438B -0.14888

407B -> 437B 0.13230

408B -> 437B -0.12242

408B -> 438B 0.14753

410B -> 437B -0.10134

410B -> 438B 0.19608

Excited State 197: 3.000-A 2.7691 eV 447.75 nm f=0.0000 <S\*\*2>=2.000

404A -> 437A 0.15900

408A -> 438A -0.11048

410A -> 438A -0.11570

|              |          |
|--------------|----------|
| 433A -> 444A | -0.12652 |
| 434A -> 443A | 0.11334  |
| 435A -> 443A | -0.22592 |
| 435A -> 444A | 0.15071  |
| 436A -> 442A | 0.13110  |
| 436A -> 444A | -0.44771 |
| 404B -> 437B | -0.15900 |
| 408B -> 438B | 0.11048  |
| 410B -> 438B | 0.11570  |
| 433B -> 444B | 0.12652  |
| 434B -> 443B | -0.11334 |
| 435B -> 443B | 0.22592  |
| 435B -> 444B | -0.15071 |
| 436B -> 442B | -0.13110 |
| 436B -> 444B | 0.44771  |

Excited State 198: 1.000-A 2.7765 eV 446.55 nm  $f=0.0016$   $\langle S^{*2} \rangle = 0.000$

|              |          |
|--------------|----------|
| 400A -> 438A | 0.10235  |
| 402A -> 437A | -0.12986 |
| 403A -> 437A | -0.13859 |
| 404A -> 437A | 0.42501  |
| 405A -> 437A | 0.17877  |
| 407A -> 437A | -0.17250 |
| 408A -> 438A | -0.22208 |
| 409A -> 438A | -0.18887 |
| 410A -> 438A | 0.10845  |
| 411A -> 438A | -0.16191 |
| 412A -> 438A | 0.17771  |
| 400B -> 438B | 0.10235  |
| 402B -> 437B | -0.12986 |
| 403B -> 437B | -0.13859 |
| 404B -> 437B | 0.42501  |
| 405B -> 437B | 0.17877  |
| 407B -> 437B | -0.17250 |
| 408B -> 438B | -0.22208 |
| 409B -> 438B | -0.18887 |



410B -> 438B 0.10845  
411B -> 438B -0.16191  
412B -> 438B 0.17771

Excited State 199: 1.000-A 2.7816 eV 445.73 nm f=0.0016 <S\*\*2>=0.000

397A -> 437A -0.17231  
398A -> 437A 0.11402  
400A -> 437A -0.16051  
403A -> 437A 0.17614  
403A -> 438A -0.16543  
404A -> 437A 0.41436  
404A -> 438A -0.12321  
406A -> 438A 0.12567  
407A -> 437A 0.15463  
407A -> 438A -0.13839  
408A -> 437A 0.11663  
410A -> 438A -0.16386  
411A -> 438A 0.10676  
412A -> 438A -0.13102  
397B -> 437B -0.17231  
398B -> 437B 0.11402  
400B -> 437B -0.16051  
403B -> 437B 0.17614  
403B -> 438B -0.16543  
404B -> 437B 0.41436  
404B -> 438B -0.12321  
406B -> 438B 0.12567  
407B -> 437B 0.15463  
407B -> 438B -0.13839  
408B -> 437B 0.11663  
410B -> 438B -0.16386  
411B -> 438B 0.10676  
412B -> 438B -0.13102

Excited State 200: 3.000-A 2.7818 eV 445.70 nm f=0.0000 <S\*\*2>=2.000

403A -> 437A -0.18555

|              |          |
|--------------|----------|
| 404A -> 437A | 0.51835  |
| 405A -> 437A | 0.17266  |
| 407A -> 437A | -0.19730 |
| 407A -> 438A | 0.14269  |
| 408A -> 437A | -0.14351 |
| 408A -> 438A | 0.14538  |
| 403B -> 437B | 0.18555  |
| 404B -> 437B | -0.51835 |
| 405B -> 437B | -0.17266 |
| 407B -> 437B | 0.19730  |
| 407B -> 438B | -0.14269 |
| 408B -> 437B | 0.14351  |
| 408B -> 438B | -0.14538 |

**Table S13.** Standard orientation of the optimized geometry for the open-ring isomer (OF6) of **[Ir( $\mu$ -Cl)(PIC)<sub>2</sub>]<sub>2</sub>**.

| Symbol | Coordinates |           |           | C | -0.422798 | -4.73604  | -4.165437 |
|--------|-------------|-----------|-----------|---|-----------|-----------|-----------|
|        | X           | Y         | Z         |   |           |           |           |
| Ir     | -0.153771   | -2.250449 | -0.057884 | C | -1.591322 | -4.618879 | -3.389548 |
| N      | 4.103067    | -3.237218 | -0.767133 | C | -1.558214 | -3.996238 | -2.140107 |
| C      | 3.210558    | -2.546683 | 0.036781  | C | -0.359994 | -3.474363 | -1.620024 |
| C      | 3.661157    | -2.070047 | 1.309387  | C | 5.411674  | -4.25716  | -3.205814 |
| C      | 5.073526    | -2.136334 | 1.669897  | C | 6.124862  | -5.094765 | -4.065733 |
| C      | 6.166387    | -2.184958 | 0.736725  | C | 5.560099  | -6.298614 | -4.504587 |
| C      | 6.174008    | -1.427638 | -0.491215 | C | 4.279862  | -6.663073 | -4.06926  |
| C      | 7.265017    | -1.410786 | -1.310423 | C | 3.560934  | -5.825396 | -3.212988 |
| C      | 8.46192     | -2.189438 | -1.01314  | N | 4.360135  | 2.022627  | 1.062012  |
| C      | 8.44201     | -2.953099 | 0.236478  | C | 3.420617  | 1.845633  | 0.049011  |
| C      | 7.364414    | -2.918347 | 1.072028  | C | 3.895896  | 1.567836  | -1.281254 |
| O      | 9.470215    | -2.200232 | -1.780068 | C | 5.233993  | 1.984636  | -1.627914 |
| C      | 2.7296      | -1.758983 | 2.333904  | C | 5.969463  | 2.980303  | -0.875587 |
| C      | 3.108579    | -1.636052 | 3.654667  | C | 5.346786  | 4.192962  | -0.401409 |
| C      | 4.45809     | -1.835381 | 4.03012   | C | 6.072185  | 5.19313   | 0.174716  |
| C      | 5.405296    | -2.090932 | 3.060429  | C | 7.514156  | 5.070667  | 0.369898  |
| C      | 3.428645    | -3.726436 | -1.815049 | C | 8.135629  | 3.838654  | -0.124715 |
| C      | 2.038848    | -3.337403 | -1.675107 | C | 7.400334  | 2.868247  | -0.741062 |
| N      | 1.910685    | -2.618824 | -0.507195 | O | 8.200784  | 5.98165   | 0.918522  |
| C      | 4.112381    | -4.602345 | -2.778107 | C | 3.153066  | 0.819423  | -2.222614 |
| C      | 0.840691    | -3.706733 | -2.365682 | C | 3.726508  | 0.400579  | -3.412369 |
| C      | 0.788307    | -4.287827 | -3.655012 | C | 5.069427  | 0.719394  | -3.713263 |
|        |             |           |           | C | 5.810407  | 1.484801  | -2.828738 |

|    |           |           |           |   |           |           |           |
|----|-----------|-----------|-----------|---|-----------|-----------|-----------|
| C  | 3.71219   | 2.529627  | 2.124256  | C | -5.194882 | -5.22426  | 4.731153  |
| C  | 2.308713  | 2.632426  | 1.790602  | C | -4.39325  | -4.753439 | 3.686923  |
| N  | 2.140778  | 2.115203  | 0.511625  | N | -4.169798 | 2.773837  | -1.040353 |
| C  | 4.453857  | 2.846172  | 3.35838   | C | -3.261556 | 2.338062  | -0.084283 |
| C  | 1.16274   | 3.252216  | 2.383679  | C | -3.75616  | 1.993887  | 1.217585  |
| C  | 1.111895  | 3.837507  | 3.671639  | C | -3.055508 | 1.135156  | 2.094903  |
| C  | 0.015313  | 4.603116  | 4.043672  | C | -3.647909 | 0.655308  | 3.249113  |
| C  | -1.036216 | 4.812307  | 3.129683  | C | -4.978911 | 1.006118  | 3.572649  |
| C  | -1.025657 | 4.190256  | 1.880574  | C | -5.680556 | 1.871884  | 2.754856  |
| C  | 0.032119  | 3.344579  | 1.499876  | C | -3.467108 | 3.261565  | -2.075276 |
| C  | 5.359     | 1.89906   | 3.875848  | C | -2.059834 | 3.064229  | -1.794933 |
| C  | 6.125159  | 2.191647  | 5.006304  | N | -1.955523 | 2.425127  | -0.568821 |
| C  | 6.013357  | 3.439585  | 5.631774  | C | -4.1778   | 3.863952  | -3.216139 |
| C  | 5.135679  | 4.39743   | 5.111384  | C | -0.837131 | 3.487672  | -2.408987 |
| C  | 4.363568  | 4.105639  | 3.983002  | C | -0.714327 | 4.072403  | -3.692063 |
| Cl | -0.004588 | -0.092062 | 1.599552  | C | 0.493517  | 4.62884   | -4.090964 |
| Cl | -0.00759  | -0.076496 | -1.687551 | C | 1.589676  | 4.625023  | -3.207282 |
| Ir | 0.089708  | 2.084928  | -0.040067 | C | 1.497815  | 3.993193  | -1.966537 |
| N  | -4.454973 | -2.333651 | 1.016209  | C | 0.313477  | 3.351212  | -1.561423 |
| C  | -3.515368 | -2.022052 | 0.040418  | C | -5.366578 | 3.259251  | -3.673885 |
| C  | -3.99323  | -1.589516 | -1.242427 | C | -6.108504 | 3.836453  | -4.705779 |
| C  | -5.363275 | -1.88605  | -1.603792 | C | -5.689709 | 5.03907   | -5.289531 |
| C  | -6.135219 | -2.938881 | -0.985252 | C | -4.529795 | 5.666083  | -4.821349 |
| C  | -5.559942 | -4.22901  | -0.680007 | C | -3.781332 | 5.087666  | -3.791801 |
| C  | -6.32433  | -5.26996  | -0.244919 | H | 5.306465  | -0.82598  | -0.725966 |
| C  | -7.760885 | -5.12183  | -0.030032 | H | 7.282655  | -0.808972 | -2.210642 |
| C  | -8.334446 | -3.811399 | -0.351771 | H | 9.317472  | -3.553263 | 0.458765  |
| C  | -7.562491 | -2.795515 | -0.834091 | H | 7.367956  | -3.516723 | 1.976171  |
| O  | -8.483943 | -6.071428 | 0.390814  | H | 1.693048  | -1.650756 | 2.071808  |
| C  | -3.215452 | -0.80988  | -2.127519 | H | 2.360134  | -1.408323 | 4.40532   |
| C  | -3.775728 | -0.24382  | -3.259046 | H | 4.75281   | -1.752759 | 5.070835  |
| C  | -5.147748 | -0.423943 | -3.548698 | H | 6.448749  | -2.158971 | 3.343922  |
| C  | -5.928576 | -1.210782 | -2.722374 | H | 1.691726  | -4.377275 | -4.245056 |
| C  | -3.808652 | -2.948601 | 2.01903   | H | -0.466928 | -5.179015 | -5.154719 |
| C  | -2.3974   | -2.968971 | 1.698204  | H | -2.533502 | -4.997275 | -3.775406 |
| N  | -2.226647 | -2.320716 | 0.481703  | H | -2.47566  | -3.886567 | -1.580418 |
| C  | -4.573379 | -3.453588 | 3.173539  | H | 5.848186  | -3.329036 | -2.855838 |
| C  | -1.246645 | -3.607969 | 2.262647  | H | 7.120786  | -4.809421 | -4.388827 |
| C  | -1.202427 | -4.278619 | 3.50862   | H | 6.114752  | -6.950184 | -5.172215 |
| C  | -0.106141 | -5.06538  | 3.835779  | H | 3.84541   | -7.605895 | -4.386105 |
| C  | 0.949288  | -5.209291 | 2.915035  | H | 2.584059  | -6.132527 | -2.857789 |
| C  | 0.950298  | -4.495209 | 1.715351  | H | 4.281967  | 4.319059  | -0.554351 |
| C  | -0.105917 | -3.620196 | 1.391617  | H | 5.610344  | 6.120234  | 0.494444  |
| C  | -5.605178 | -2.656078 | 3.708632  | H | 9.203888  | 3.734064  | 0.029416  |
| C  | -6.400402 | -3.126917 | 4.755129  | H | 7.879269  | 1.956028  | -1.08029  |
| C  | -6.194272 | -4.410573 | 5.276238  | H | 2.145091  | 0.518957  | -1.982932 |

|   |           |           |           |   |           |           |           |
|---|-----------|-----------|-----------|---|-----------|-----------|-----------|
| H | 3.140845  | -0.196457 | -4.102946 | H | -5.049248 | -6.232242 | 5.106157  |
| H | 5.512002  | 0.388332  | -4.646889 | H | -3.650173 | -5.40825  | 3.246617  |
| H | 6.817516  | 1.788941  | -3.091806 | H | -2.065504 | 0.800451  | 1.829753  |
| H | 1.92668   | 3.686283  | 4.367288  | H | -3.092739 | -0.020692 | 3.88999   |
| H | -0.025114 | 5.050767  | 5.031069  | H | -5.437304 | 0.621697  | 4.477642  |
| H | -1.871798 | 5.448226  | 3.407483  | H | -6.671748 | 2.200854  | 3.045754  |
| H | -1.854411 | 4.341297  | 1.202258  | H | -1.560035 | 4.078916  | -4.367028 |
| H | 5.452035  | 0.939733  | 3.38093   | H | 0.58871   | 5.073601  | -5.075883 |
| H | 6.813878  | 1.448748  | 5.39652   | H | 2.521997  | 5.097273  | -3.502785 |
| H | 6.612878  | 3.667867  | 6.50712   | H | 2.361903  | 3.96848   | -1.318594 |
| H | 5.063431  | 5.377169  | 5.572586  | H | -5.698337 | 2.343192  | -3.199978 |
| H | 3.714438  | 4.867493  | 3.565782  | H | -7.018293 | 3.354462  | -5.050029 |
| H | -4.500368 | -4.373315 | -0.853581 | H | -6.26937  | 5.489866  | -6.088511 |
| H | -5.898193 | -6.248533 | -0.055835 | H | -4.215003 | 6.614315  | -5.24517  |
| H | -9.39885  | -3.690276 | -0.183055 | H | -2.908143 | 5.604543  | -3.411114 |
| H | -8.007539 | -1.830382 | -1.051065 | C | -5.069874 | 2.460723  | 1.610772  |
| H | -2.184277 | -0.606558 | -1.886892 | C | -5.730631 | 3.590539  | 1.000456  |
| H | -3.15963  | 0.368409  | -3.908188 | C | -7.168741 | 3.616113  | 0.893993  |
| H | -5.579147 | 0.029202  | -4.434834 | C | -5.016705 | 4.798616  | 0.656483  |
| H | -6.960213 | -1.411605 | -2.988536 | C | -7.829578 | 4.710927  | 0.418962  |
| H | -2.022384 | -4.177761 | 4.207252  | H | -7.718353 | 2.713546  | 1.138796  |
| H | -0.071268 | -5.57969  | 4.790455  | C | -5.665392 | 5.918512  | 0.229524  |
| H | 1.783795  | -5.863571 | 3.149388  | H | -3.943241 | 4.815548  | 0.79825   |
| H | 1.791891  | -4.59983  | 1.043462  | H | -8.905609 | 4.715222  | 0.283841  |
| H | -5.776251 | -1.674409 | 3.283274  | H | -5.132241 | 6.836872  | 0.012008  |
| H | -7.186799 | -2.497173 | 5.159613  | C | -7.115305 | 5.940013  | 0.060288  |
| H | -6.815705 | -4.778019 | 6.086444  | O | -7.733958 | 6.963792  | -0.353396 |

Excited State 1: 3.000-A -0.5908 eV -2098.73 nm  $f=-0.0000$   $\langle S^{*2} \rangle=2.000$

|              |          |
|--------------|----------|
| 434A -> 437A | 0.20318  |
| 434A -> 438A | -0.17995 |
| 434A -> 439A | -0.24615 |
| 434A -> 440A | -0.18391 |
| 436A -> 437A | -0.36927 |
| 436A -> 438A | 0.27026  |
| 436A -> 439A | 0.19525  |
| 436A -> 440A | 0.14964  |
| 434B -> 437B | -0.20318 |
| 434B -> 438B | 0.17995  |
| 434B -> 439B | 0.24615  |
| 434B -> 440B | 0.18391  |

436B -> 437B 0.36927  
436B -> 438B -0.27026  
436B -> 439B -0.19525  
436B -> 440B -0.14964

This state for optimization and/or second-order correction.

Total Energy, E(TD-HF/TD-DFT) = -6023.89106891

Copying the excited state density for this state as the 1-particle RhoCI density.

Excited State 2: 3.000-A -0.5828 eV -2127.29 nm f=-0.0000 <S\*\*2>=2.000

433A -> 438A 0.10007  
433A -> 439A -0.28075  
433A -> 440A 0.30210  
435A -> 437A -0.23435  
435A -> 438A -0.33171  
435A -> 439A 0.23228  
435A -> 440A -0.18628  
433B -> 438B -0.10007  
433B -> 439B 0.28075  
433B -> 440B -0.30210  
435B -> 437B 0.23435  
435B -> 438B 0.33171  
435B -> 439B -0.23228  
435B -> 440B 0.18628

Excited State 3: 3.000-A -0.5764 eV -2151.16 nm f=-0.0000 <S\*\*2>=2.000

433A -> 437A -0.18217  
433A -> 438A -0.33708  
434A -> 437A -0.18858  
435A -> 437A -0.14050  
435A -> 438A -0.25232  
435A -> 439A -0.17676  
435A -> 440A 0.32228  
436A -> 437A -0.13123  
436A -> 439A -0.17198  
433B -> 437B 0.18217  
433B -> 438B 0.33708

|              |          |
|--------------|----------|
| 434B -> 437B | 0.18858  |
| 435B -> 437B | 0.14050  |
| 435B -> 438B | 0.25232  |
| 435B -> 439B | 0.17676  |
| 435B -> 440B | -0.32228 |
| 436B -> 437B | 0.13123  |
| 436B -> 439B | 0.17198  |

Excited State 4: 3.000-A -0.5734 eV -2162.26 nm f=-0.0000 <S\*\*2>=2.000

|              |          |
|--------------|----------|
| 433A -> 437A | -0.16921 |
| 434A -> 437A | 0.26505  |
| 434A -> 438A | -0.18813 |
| 434A -> 439A | 0.18245  |
| 434A -> 440A | 0.15795  |
| 435A -> 437A | -0.13129 |
| 435A -> 439A | -0.14924 |
| 436A -> 437A | 0.22059  |
| 436A -> 438A | -0.10997 |
| 436A -> 439A | 0.29002  |
| 436A -> 440A | 0.26370  |
| 433B -> 437B | 0.16921  |
| 434B -> 437B | -0.26505 |
| 434B -> 438B | 0.18813  |
| 434B -> 439B | -0.18245 |
| 434B -> 440B | -0.15795 |
| 435B -> 437B | 0.13129  |
| 435B -> 439B | 0.14924  |
| 436B -> 437B | -0.22059 |
| 436B -> 438B | 0.10997  |
| 436B -> 439B | -0.29002 |
| 436B -> 440B | -0.26370 |

Excited State 5: 3.000-A 0.6621 eV 1872.62 nm f=0.0000 <S\*\*2>=2.000

|              |          |
|--------------|----------|
| 435A -> 438A | 0.10948  |
| 436A -> 437A | -0.40308 |
| 436A -> 438A | -0.54183 |

435B -> 438B -0.10948  
436B -> 437B 0.40308  
436B -> 438B 0.54183

Excited State 6: 1.000-A 0.6661 eV 1861.24 nm f=0.0003 <S\*\*2>=0.000

435A -> 437A -0.10145  
436A -> 437A 0.40267  
436A -> 438A 0.53614  
436A -> 439A -0.13194  
435B -> 437B -0.10145  
436B -> 437B 0.40267  
436B -> 438B 0.53614  
436B -> 439B -0.13194

Excited State 7: 3.000-A 0.6750 eV 1836.75 nm f=0.0000 <S\*\*2>=2.000

430A -> 439A -0.11401  
432A -> 439A 0.13051  
433A -> 437A 0.11869  
434A -> 437A -0.29259  
434A -> 438A 0.18453  
435A -> 437A -0.23718  
435A -> 438A 0.16544  
436A -> 437A -0.12749  
436A -> 438A 0.11541  
436A -> 439A 0.36465  
436A -> 440A 0.21967  
430B -> 439B 0.11401  
432B -> 439B -0.13051  
433B -> 437B -0.11869  
434B -> 437B 0.29259  
434B -> 438B -0.18453  
435B -> 437B 0.23718  
435B -> 438B -0.16544  
436B -> 437B 0.12749  
436B -> 438B -0.11541  
436B -> 439B -0.36465

436B -> 440B -0.21967

Excited State 8: 3.000-A 0.6831 eV 1815.00 nm f=0.0000 <S\*\*2>=2.000

434A -> 437A 0.17915

435A -> 437A -0.49315

435A -> 438A 0.29248

436A -> 437A -0.12384

436A -> 438A 0.13605

436A -> 439A -0.23263

434B -> 437B -0.17915

435B -> 437B 0.49315

435B -> 438B -0.29248

436B -> 437B 0.12384

436B -> 438B -0.13605

436B -> 439B 0.23263

Excited State 9: 1.000-A 0.6863 eV 1806.58 nm f=0.0000 <S\*\*2>=0.000

435A -> 437A 0.57332

435A -> 438A -0.34727

436A -> 437A 0.16530

435B -> 437B 0.57332

435B -> 438B -0.34727

436B -> 437B 0.16530

Excited State 10: 3.000-A 0.7180 eV 1726.70 nm f=0.0000 <S\*\*2>=2.000

432A -> 440A 0.13022

433A -> 437A 0.18354

433A -> 438A 0.24031

435A -> 439A -0.15641

435A -> 440A 0.13579

436A -> 439A -0.29948

436A -> 440A 0.46586

432B -> 440B -0.13022

433B -> 437B -0.18354

433B -> 438B -0.24031

435B -> 439B 0.15641



435B -> 440B -0.13579  
436B -> 439B 0.29948  
436B -> 440B -0.46586

Excited State 11: 1.000-A 0.7323 eV 1693.07 nm  $f=0.0029$   $\langle S^{*2} \rangle=0.000$

434A -> 438A 0.14154  
436A -> 438A 0.12182  
436A -> 439A 0.52079  
436A -> 440A -0.41579  
434B -> 438B 0.14154  
436B -> 438B 0.12182  
436B -> 439B 0.52079  
436B -> 440B -0.41579

Excited State 12: 3.000-A 0.7487 eV 1656.10 nm  $f=0.0000$   $\langle S^{*2} \rangle=2.000$

433A -> 437A 0.13663  
433A -> 438A 0.19950  
434A -> 438A 0.11039  
434A -> 439A -0.24169  
434A -> 440A -0.11813  
435A -> 437A -0.14505  
435A -> 439A -0.29214  
435A -> 440A 0.24997  
436A -> 437A 0.19730  
436A -> 439A 0.20087  
436A -> 440A -0.23260  
433B -> 437B -0.13663  
433B -> 438B -0.19950  
434B -> 438B -0.11039  
434B -> 439B 0.24169  
434B -> 440B 0.11813  
435B -> 437B 0.14505  
435B -> 439B 0.29214  
435B -> 440B -0.24997  
436B -> 437B -0.19730  
436B -> 439B -0.20087

436B -> 440B 0.23260

Excited State 13: 3.000-A 0.7495 eV 1654.14 nm f=0.0000 <S\*\*2>=2.000

430A -> 437A 0.10401  
432A -> 437A -0.12647  
433A -> 439A -0.10364  
434A -> 438A 0.15751  
434A -> 439A 0.27666  
434A -> 440A 0.22313  
435A -> 437A 0.10782  
435A -> 438A -0.14979  
435A -> 439A -0.28830  
436A -> 437A -0.24168  
436A -> 438A 0.24191  
436A -> 440A -0.21447  
430B -> 437B -0.10401  
432B -> 437B 0.12647  
433B -> 439B 0.10364  
434B -> 438B -0.15751  
434B -> 439B -0.27666  
434B -> 440B -0.22313  
435B -> 437B -0.10782  
435B -> 438B 0.14979  
435B -> 439B 0.28830  
436B -> 437B 0.24168  
436B -> 438B -0.24191  
436B -> 440B 0.21447

Excited State 14: 1.000-A 0.7610 eV 1629.19 nm f=0.0027 <S\*\*2>=0.000

433A -> 437A 0.12018  
433A -> 438A -0.12844  
435A -> 437A 0.13417  
435A -> 438A 0.11072  
435A -> 439A 0.53082  
435A -> 440A 0.27955  
436A -> 439A 0.18241

|              |          |
|--------------|----------|
| 436A -> 440A | 0.19567  |
| 433B -> 437B | 0.12018  |
| 433B -> 438B | -0.12844 |
| 435B -> 437B | 0.13417  |
| 435B -> 438B | 0.11072  |
| 435B -> 439B | 0.53082  |
| 435B -> 440B | 0.27955  |
| 436B -> 439B | 0.18241  |
| 436B -> 440B | 0.19567  |

Excited State 15: 3.000-A 0.7667 eV 1617.09 nm  $f=0.0000$   $\langle S^{*2} \rangle = 2.000$

|              |          |
|--------------|----------|
| 433A -> 437A | -0.14915 |
| 434A -> 437A | -0.15198 |
| 435A -> 437A | -0.14466 |
| 435A -> 439A | -0.38646 |
| 435A -> 440A | -0.49613 |
| 433B -> 437B | 0.14915  |
| 434B -> 437B | 0.15198  |
| 435B -> 437B | 0.14466  |
| 435B -> 439B | 0.38646  |
| 435B -> 440B | 0.49613  |

Excited State 16: 1.000-A 0.7761 eV 1597.55 nm  $f=0.0192$   $\langle S^{*2} \rangle = 0.000$

|              |          |
|--------------|----------|
| 432A -> 437A | 0.10072  |
| 434A -> 439A | -0.21445 |
| 435A -> 438A | 0.32662  |
| 435A -> 439A | -0.11494 |
| 436A -> 437A | 0.47736  |
| 436A -> 438A | -0.28455 |
| 432B -> 437B | 0.10072  |
| 434B -> 439B | -0.21445 |
| 435B -> 438B | 0.32662  |
| 435B -> 439B | -0.11494 |
| 436B -> 437B | 0.47736  |
| 436B -> 438B | -0.28455 |

Excited State 17: 3.000-A 0.7953 eV 1558.97 nm  $f=0.0000$   $\langle S^{*2} \rangle = 2.000$

|              |          |
|--------------|----------|
| 430A -> 438A | -0.12385 |
| 432A -> 437A | -0.11111 |
| 432A -> 438A | -0.15372 |
| 433A -> 439A | 0.29120  |
| 433A -> 440A | -0.31619 |
| 434A -> 439A | 0.11095  |
| 434A -> 440A | -0.10565 |
| 435A -> 437A | -0.20711 |
| 435A -> 438A | -0.38720 |
| 435A -> 439A | 0.15500  |
| 430B -> 438B | 0.12385  |
| 432B -> 437B | 0.11111  |
| 432B -> 438B | 0.15372  |
| 433B -> 439B | -0.29120 |
| 433B -> 440B | 0.31619  |
| 434B -> 439B | -0.11095 |
| 434B -> 440B | 0.10565  |
| 435B -> 437B | 0.20711  |
| 435B -> 438B | 0.38720  |
| 435B -> 439B | -0.15500 |

Excited State 18: 1.000-A 0.7985 eV 1552.72 nm  $f=0.0005$   $\langle S^{*2} \rangle = 0.000$

|              |          |
|--------------|----------|
| 434A -> 437A | -0.36093 |
| 434A -> 438A | 0.13817  |
| 435A -> 439A | -0.18897 |
| 435A -> 440A | -0.20117 |
| 436A -> 439A | 0.29960  |
| 436A -> 440A | 0.42100  |
| 434B -> 437B | -0.36093 |
| 434B -> 438B | 0.13817  |
| 435B -> 439B | -0.18897 |
| 435B -> 440B | -0.20117 |
| 436B -> 439B | 0.29960  |
| 436B -> 440B | 0.42100  |

Excited State 19: 1.000-A 0.8411 eV 1473.99 nm  $f=0.1750$   $\langle S^{*2} \rangle=0.000$

|              |          |
|--------------|----------|
| 433A -> 437A | -0.10522 |
| 433A -> 438A | -0.10565 |
| 433A -> 439A | -0.17538 |
| 433A -> 440A | 0.13786  |
| 434A -> 440A | 0.13638  |
| 435A -> 437A | 0.32728  |
| 435A -> 438A | 0.42513  |
| 435A -> 440A | -0.11396 |
| 436A -> 437A | -0.16628 |
| 436A -> 438A | 0.26001  |
| 433B -> 437B | -0.10522 |
| 433B -> 438B | -0.10565 |
| 433B -> 439B | -0.17538 |
| 433B -> 440B | 0.13786  |
| 434B -> 440B | 0.13638  |
| 435B -> 437B | 0.32728  |
| 435B -> 438B | 0.42513  |
| 435B -> 440B | -0.11396 |
| 436B -> 437B | -0.16628 |
| 436B -> 438B | 0.26001  |

Excited State 20: 1.000-A 0.8430 eV 1470.73 nm  $f=0.0122$   $\langle S^{*2} \rangle=0.000$

|              |          |
|--------------|----------|
| 433A -> 437A | 0.26269  |
| 433A -> 438A | 0.22241  |
| 433A -> 439A | -0.12438 |
| 434A -> 438A | 0.12639  |
| 435A -> 439A | -0.28999 |
| 435A -> 440A | 0.47770  |
| 433B -> 437B | 0.26269  |
| 433B -> 438B | 0.22241  |
| 433B -> 439B | -0.12438 |
| 434B -> 438B | 0.12639  |
| 435B -> 439B | -0.28999 |
| 435B -> 440B | 0.47770  |

Excited State 21: 3.000-A 0.9587 eV 1293.23 nm  $f=0.0000$   $\langle S^{*2} \rangle = 2.000$

|              |          |
|--------------|----------|
| 433A -> 437A | -0.52990 |
| 433A -> 438A | 0.27812  |
| 434A -> 438A | 0.30446  |
| 435A -> 439A | 0.13010  |
| 435A -> 440A | 0.10337  |
| 433B -> 437B | 0.52990  |
| 433B -> 438B | -0.27812 |
| 434B -> 438B | -0.30446 |
| 435B -> 439B | -0.13010 |
| 435B -> 440B | -0.10337 |

Excited State 22: 1.000-A 0.9600 eV 1291.48 nm  $f=0.0001$   $\langle S^{*2} \rangle = 0.000$

|              |          |
|--------------|----------|
| 433A -> 437A | 0.49344  |
| 433A -> 438A | -0.19681 |
| 434A -> 438A | -0.40458 |
| 435A -> 440A | -0.10063 |
| 436A -> 440A | -0.10944 |
| 433B -> 437B | 0.49344  |
| 433B -> 438B | -0.19681 |
| 434B -> 438B | -0.40458 |
| 435B -> 440B | -0.10063 |
| 436B -> 440B | -0.10944 |

Excited State 23: 3.000-A 0.9602 eV 1291.20 nm  $f=0.0000$   $\langle S^{*2} \rangle = 2.000$

|              |          |
|--------------|----------|
| 433A -> 438A | 0.30233  |
| 434A -> 437A | -0.37478 |
| 434A -> 438A | -0.45709 |
| 434A -> 439A | 0.11634  |
| 436A -> 440A | -0.10993 |
| 433B -> 438B | -0.30233 |
| 434B -> 437B | 0.37478  |
| 434B -> 438B | 0.45709  |
| 434B -> 439B | -0.11634 |
| 436B -> 440B | 0.10993  |

Excited State 24: 1.000-A 0.9636 eV 1286.67 nm  $f=0.0023$   $\langle S^{*2} \rangle=0.000$

433A -> 437A -0.20987  
433A -> 438A 0.37089  
434A -> 437A -0.36356  
434A -> 438A -0.36596  
434A -> 439A 0.10360  
435A -> 440A 0.13834  
436A -> 440A -0.10592  
433B -> 437B -0.20987  
433B -> 438B 0.37089  
434B -> 437B -0.36356  
434B -> 438B -0.36596  
434B -> 439B 0.10360  
435B -> 440B 0.13834  
436B -> 440B -0.10592

Excited State 25: 3.000-A 1.0293 eV 1204.54 nm  $f=0.0000$   $\langle S^{*2} \rangle=2.000$

433A -> 439A -0.16046  
433A -> 440A 0.13701  
434A -> 439A 0.37902  
434A -> 440A -0.52765  
433B -> 439B 0.16046  
433B -> 440B -0.13701  
434B -> 439B -0.37902  
434B -> 440B 0.52765

Excited State 26: 1.000-A 1.0308 eV 1202.77 nm  $f=0.0018$   $\langle S^{*2} \rangle=0.000$

433A -> 439A 0.23289  
434A -> 439A -0.40684  
434A -> 440A 0.49224  
433B -> 439B 0.23289  
434B -> 439B -0.40684  
434B -> 440B 0.49224

Excited State 27: 3.000-A 1.0368 eV 1195.83 nm  $f=0.0000$   $\langle S^{*2} \rangle=2.000$

431A -> 439A -0.11296

|              |          |
|--------------|----------|
| 433A -> 437A | -0.11807 |
| 433A -> 439A | -0.47295 |
| 433A -> 440A | -0.42019 |
| 434A -> 439A | -0.17574 |
| 431B -> 439B | 0.11296  |
| 433B -> 437B | 0.11807  |
| 433B -> 439B | 0.47295  |
| 433B -> 440B | 0.42019  |
| 434B -> 439B | 0.17574  |

Excited State 28: 1.000-A 1.0403 eV 1191.78 nm  $f=0.0016$   $\langle S^{*2} \rangle=0.000$

|              |         |
|--------------|---------|
| 433A -> 437A | 0.12143 |
| 433A -> 439A | 0.49107 |
| 433A -> 440A | 0.39817 |
| 434A -> 439A | 0.23246 |
| 435A -> 438A | 0.11117 |
| 433B -> 437B | 0.12143 |
| 433B -> 439B | 0.49107 |
| 433B -> 440B | 0.39817 |
| 434B -> 439B | 0.23246 |
| 435B -> 438B | 0.11117 |

Excited State 29: 3.000-A 1.0921 eV 1135.29 nm  $f=0.0000$   $\langle S^{*2} \rangle=2.000$

|              |          |
|--------------|----------|
| 429A -> 437A | 0.11929  |
| 429A -> 438A | -0.11400 |
| 429A -> 439A | -0.17110 |
| 429A -> 440A | -0.14494 |
| 431A -> 437A | 0.27574  |
| 431A -> 438A | -0.24274 |
| 431A -> 439A | -0.34621 |
| 431A -> 440A | -0.25433 |
| 432A -> 437A | -0.13588 |
| 433A -> 439A | 0.11761  |
| 433A -> 440A | 0.11148  |
| 429B -> 437B | -0.11929 |
| 429B -> 438B | 0.11400  |



|              |          |
|--------------|----------|
| 429B -> 439B | 0.17110  |
| 429B -> 440B | 0.14494  |
| 431B -> 437B | -0.27574 |
| 431B -> 438B | 0.24274  |
| 431B -> 439B | 0.34621  |
| 431B -> 440B | 0.25433  |
| 432B -> 437B | 0.13588  |
| 433B -> 439B | -0.11761 |
| 433B -> 440B | -0.11148 |

Excited State 30: 3.000-A 1.1128 eV 1114.14 nm f=0.0000 <S\*\*2>=2.000

|              |          |
|--------------|----------|
| 429A -> 437A | -0.15910 |
| 429A -> 438A | 0.13471  |
| 429A -> 439A | -0.11031 |
| 429A -> 440A | -0.13282 |
| 430A -> 437A | 0.11100  |
| 430A -> 439A | 0.11867  |
| 431A -> 437A | -0.41362 |
| 431A -> 438A | 0.11442  |
| 431A -> 439A | -0.23501 |
| 431A -> 440A | -0.11762 |
| 432A -> 437A | -0.17771 |
| 432A -> 439A | -0.17879 |
| 429B -> 437B | 0.15910  |
| 429B -> 438B | -0.13471 |
| 429B -> 439B | 0.11031  |
| 429B -> 440B | 0.13282  |
| 430B -> 437B | -0.11100 |
| 430B -> 439B | -0.11867 |
| 431B -> 437B | 0.41362  |
| 431B -> 438B | -0.11442 |
| 431B -> 439B | 0.23501  |
| 431B -> 440B | 0.11762  |
| 432B -> 437B | 0.17771  |
| 432B -> 439B | 0.17879  |

Excited State 31: 1.000-A 1.1206 eV 1106.42 nm  $f=0.0566$   $\langle S^{*2} \rangle=0.000$

|              |          |
|--------------|----------|
| 431A -> 438A | 0.10678  |
| 431A -> 439A | 0.22740  |
| 431A -> 440A | 0.13499  |
| 432A -> 437A | 0.20431  |
| 433A -> 440A | -0.22506 |
| 434A -> 439A | 0.36072  |
| 434A -> 440A | 0.33223  |
| 436A -> 437A | 0.15295  |
| 431B -> 438B | 0.10678  |
| 431B -> 439B | 0.22740  |
| 431B -> 440B | 0.13499  |
| 432B -> 437B | 0.20431  |
| 433B -> 440B | -0.22506 |
| 434B -> 439B | 0.36072  |
| 434B -> 440B | 0.33223  |
| 436B -> 437B | 0.15295  |

Excited State 32: 3.000-A 1.1354 eV 1092.02 nm  $f=0.0000$   $\langle S^{*2} \rangle=2.000$

|              |          |
|--------------|----------|
| 429A -> 437A | 0.17707  |
| 429A -> 438A | 0.17165  |
| 429A -> 439A | 0.13340  |
| 429A -> 440A | -0.12730 |
| 431A -> 437A | -0.11663 |
| 431A -> 438A | -0.32800 |
| 431A -> 440A | 0.25941  |
| 432A -> 437A | -0.13626 |
| 432A -> 438A | -0.25827 |
| 432A -> 440A | 0.17526  |
| 433A -> 437A | -0.10300 |
| 433A -> 438A | -0.15620 |
| 433A -> 440A | 0.12793  |
| 429B -> 437B | -0.17707 |
| 429B -> 438B | -0.17165 |
| 429B -> 439B | -0.13340 |
| 429B -> 440B | 0.12730  |

|              |          |
|--------------|----------|
| 431B -> 437B | 0.11663  |
| 431B -> 438B | 0.32800  |
| 431B -> 440B | -0.25941 |
| 432B -> 437B | 0.13626  |
| 432B -> 438B | 0.25827  |
| 432B -> 440B | -0.17526 |
| 433B -> 437B | 0.10300  |
| 433B -> 438B | 0.15620  |
| 433B -> 440B | -0.12793 |

Excited State 33: 1.000-A 1.1500 eV 1078.17 nm f=0.0817 <S\*\*2>=0.000

|              |          |
|--------------|----------|
| 429A -> 438A | -0.12130 |
| 431A -> 437A | 0.27483  |
| 431A -> 440A | -0.13352 |
| 432A -> 437A | 0.14405  |
| 432A -> 438A | 0.16618  |
| 433A -> 438A | 0.30968  |
| 433A -> 439A | 0.13140  |
| 433A -> 440A | -0.29596 |
| 434A -> 437A | 0.21540  |
| 435A -> 438A | 0.12601  |
| 435A -> 440A | -0.14036 |
| 436A -> 439A | 0.11809  |
| 429B -> 438B | -0.12130 |
| 431B -> 437B | 0.27483  |
| 431B -> 440B | -0.13352 |
| 432B -> 437B | 0.14405  |
| 432B -> 438B | 0.16618  |
| 433B -> 438B | 0.30968  |
| 433B -> 439B | 0.13140  |
| 433B -> 440B | -0.29596 |
| 434B -> 437B | 0.21540  |
| 435B -> 438B | 0.12601  |
| 435B -> 440B | -0.14036 |
| 436B -> 439B | 0.11809  |

Excited State 34: 3.000-A 1.1567 eV 1071.86 nm  $f=0.0000$   $\langle S^{*2} \rangle = 2.000$

|              |          |
|--------------|----------|
| 424A -> 437A | 0.43572  |
| 424A -> 438A | -0.34241 |
| 424A -> 439A | -0.31814 |
| 424A -> 440A | -0.24427 |
| 424B -> 437B | -0.43572 |
| 424B -> 438B | 0.34241  |
| 424B -> 439B | 0.31814  |
| 424B -> 440B | 0.24427  |

Excited State 35: 1.000-A 1.1719 eV 1058.00 nm  $f=0.0742$   $\langle S^{*2} \rangle = 0.000$

|              |          |
|--------------|----------|
| 429A -> 437A | 0.15540  |
| 430A -> 437A | -0.13528 |
| 431A -> 437A | 0.27534  |
| 431A -> 438A | -0.21865 |
| 431A -> 440A | 0.10859  |
| 432A -> 438A | -0.14397 |
| 433A -> 437A | -0.13034 |
| 433A -> 439A | -0.15265 |
| 433A -> 440A | 0.18895  |
| 434A -> 437A | 0.25628  |
| 434A -> 438A | -0.20811 |
| 434A -> 440A | 0.17714  |
| 436A -> 439A | 0.18769  |
| 436A -> 440A | 0.17553  |
| 429B -> 437B | 0.15540  |
| 430B -> 437B | -0.13528 |
| 431B -> 437B | 0.27534  |
| 431B -> 438B | -0.21865 |
| 431B -> 440B | 0.10859  |
| 432B -> 438B | -0.14397 |
| 433B -> 437B | -0.13034 |
| 433B -> 439B | -0.15265 |
| 433B -> 440B | 0.18895  |
| 434B -> 437B | 0.25628  |
| 434B -> 438B | -0.20811 |

434B -> 440B 0.17714  
436B -> 439B 0.18769  
436B -> 440B 0.17553

Excited State 36: 3.000-A 1.1806 eV 1050.19 nm f=0.0000 <S\*\*2>=2.000

429A -> 439A -0.10201  
429A -> 440A 0.19483  
430A -> 438A -0.26088  
430A -> 439A -0.14183  
430A -> 440A 0.19132  
431A -> 437A 0.10162  
431A -> 439A 0.23152  
431A -> 440A -0.17606  
432A -> 437A -0.28350  
432A -> 438A -0.12203  
432A -> 439A -0.12347  
432A -> 440A 0.16638  
433A -> 438A -0.14098  
429B -> 439B 0.10201  
429B -> 440B -0.19483  
430B -> 438B 0.26088  
430B -> 439B 0.14183  
430B -> 440B -0.19132  
431B -> 437B -0.10162  
431B -> 439B -0.23152  
431B -> 440B 0.17606  
432B -> 437B 0.28350  
432B -> 438B 0.12203  
432B -> 439B 0.12347  
432B -> 440B -0.16638  
433B -> 438B 0.14098

Excited State 37: 3.000-A 1.1856 eV 1045.77 nm f=0.0000 <S\*\*2>=2.000

429A -> 439A -0.11364  
430A -> 437A -0.28991  
430A -> 438A 0.12493

|              |          |
|--------------|----------|
| 430A -> 439A | 0.13224  |
| 430A -> 440A | 0.20198  |
| 431A -> 440A | -0.13140 |
| 432A -> 437A | 0.25342  |
| 432A -> 438A | -0.26223 |
| 432A -> 439A | -0.24936 |
| 434A -> 437A | -0.12993 |
| 434A -> 439A | 0.12824  |
| 434A -> 440A | 0.13707  |
| 429B -> 439B | 0.11364  |
| 430B -> 437B | 0.28991  |
| 430B -> 438B | -0.12493 |
| 430B -> 439B | -0.13224 |
| 430B -> 440B | -0.20198 |
| 431B -> 440B | 0.13140  |
| 432B -> 437B | -0.25342 |
| 432B -> 438B | 0.26223  |
| 432B -> 439B | 0.24936  |
| 434B -> 437B | 0.12993  |
| 434B -> 439B | -0.12824 |
| 434B -> 440B | -0.13707 |

Excited State 38: 3.000-A 1.1887 eV 1043.02 nm  $f=0.0000$   $\langle S^2 \rangle = 2.000$

|              |          |
|--------------|----------|
| 429A -> 437A | 0.12228  |
| 429A -> 438A | 0.17346  |
| 429A -> 439A | -0.16269 |
| 429A -> 440A | 0.13165  |
| 430A -> 437A | 0.10308  |
| 430A -> 438A | 0.17188  |
| 430A -> 439A | -0.13046 |
| 431A -> 437A | -0.21774 |
| 431A -> 438A | -0.29117 |
| 431A -> 439A | 0.20600  |
| 431A -> 440A | -0.24314 |
| 432A -> 437A | 0.14243  |
| 432A -> 438A | 0.14703  |

|              |          |
|--------------|----------|
| 433A -> 440A | -0.10216 |
| 429B -> 437B | -0.12228 |
| 429B -> 438B | -0.17346 |
| 429B -> 439B | 0.16269  |
| 429B -> 440B | -0.13165 |
| 430B -> 437B | -0.10308 |
| 430B -> 438B | -0.17188 |
| 430B -> 439B | 0.13046  |
| 431B -> 437B | 0.21774  |
| 431B -> 438B | 0.29117  |
| 431B -> 439B | -0.20600 |
| 431B -> 440B | 0.24314  |
| 432B -> 437B | -0.14243 |
| 432B -> 438B | -0.14703 |
| 433B -> 440B | 0.10216  |

Excited State 39: 3.000-A 1.1951 eV 1037.46 nm f=0.0000 <S\*\*2>=2.000

|              |          |
|--------------|----------|
| 423A -> 437A | -0.42042 |
| 423A -> 438A | 0.18571  |
| 423A -> 439A | -0.34880 |
| 423A -> 440A | -0.26528 |
| 423B -> 437B | 0.42042  |
| 423B -> 438B | -0.18571 |
| 423B -> 439B | 0.34880  |
| 423B -> 440B | 0.26528  |

Excited State 40: 3.000-A 1.2011 eV 1032.25 nm f=0.0000 <S\*\*2>=2.000

|              |          |
|--------------|----------|
| 421A -> 438A | -0.11073 |
| 422A -> 437A | -0.33083 |
| 422A -> 438A | -0.48150 |
| 422A -> 439A | -0.16033 |
| 422A -> 440A | 0.29249  |
| 421B -> 438B | 0.11073  |
| 422B -> 437B | 0.33083  |
| 422B -> 438B | 0.48150  |
| 422B -> 439B | 0.16033  |

422B -> 440B -0.29249

Excited State 41: 3.000-A 1.2042 eV 1029.62 nm f=0.0000 <S\*\*2>=2.000

423A -> 437A -0.13622

423A -> 439A -0.11396

429A -> 437A 0.10444

430A -> 437A 0.20268

430A -> 439A 0.22777

430A -> 440A 0.12200

431A -> 437A 0.18278

431A -> 438A -0.13683

431A -> 439A 0.17540

431A -> 440A 0.15598

432A -> 437A -0.16700

432A -> 438A 0.12021

432A -> 439A -0.25022

432A -> 440A -0.21871

434A -> 437A -0.13801

434A -> 439A -0.10834

434A -> 440A -0.11718

423B -> 437B 0.13622

423B -> 439B 0.11396

429B -> 437B -0.10444

430B -> 437B -0.20268

430B -> 439B -0.22777

430B -> 440B -0.12200

431B -> 437B -0.18278

431B -> 438B 0.13683

431B -> 439B -0.17540

431B -> 440B -0.15598

432B -> 437B 0.16700

432B -> 438B -0.12021

432B -> 439B 0.25022

432B -> 440B 0.21871

434B -> 437B 0.13801

434B -> 439B 0.10834



434B -> 440B 0.11718

Excited State 42: 3.000-A 1.2180 eV 1017.92 nm f=0.0000 <S\*\*2>=2.000

425A -> 437A 0.23539

425A -> 438A 0.31824

425A -> 439A -0.38280

425A -> 440A 0.36292

425B -> 437B -0.23539

425B -> 438B -0.31824

425B -> 439B 0.38280

425B -> 440B -0.36292

Excited State 43: 3.000-A 1.2351 eV 1003.81 nm f=0.0000 <S\*\*2>=2.000

429A -> 439A -0.10626

430A -> 439A 0.19693

430A -> 440A -0.16585

431A -> 438A -0.14184

431A -> 439A 0.16256

431A -> 440A -0.16719

432A -> 437A -0.13419

432A -> 438A -0.20799

432A -> 439A 0.27862

432A -> 440A -0.30205

433A -> 438A 0.10414

433A -> 439A -0.11815

433A -> 440A 0.12624

429B -> 439B 0.10626

430B -> 439B -0.19693

430B -> 440B 0.16585

431B -> 438B 0.14184

431B -> 439B -0.16256

431B -> 440B 0.16719

432B -> 437B 0.13419

432B -> 438B 0.20799

432B -> 439B -0.27862

432B -> 440B 0.30205

433B -> 438B -0.10414  
433B -> 439B 0.11815  
433B -> 440B -0.12624

Excited State 44: 1.000-A 1.2432 eV 997.27 nm f=0.0037 <S\*\*2>=0.000

429A -> 440A 0.15352  
430A -> 438A -0.23872  
431A -> 437A 0.10999  
431A -> 438A 0.23782  
431A -> 439A 0.35851  
431A -> 440A 0.12929  
432A -> 437A -0.35447  
434A -> 439A -0.10258  
429B -> 440B 0.15352  
430B -> 438B -0.23872  
431B -> 437B 0.10999  
431B -> 438B 0.23782  
431B -> 439B 0.35851  
431B -> 440B 0.12929  
432B -> 437B -0.35447  
434B -> 439B -0.10258

Excited State 45: 1.000-A 1.2600 eV 984.01 nm f=0.0111 <S\*\*2>=0.000

429A -> 437A 0.10635  
429A -> 438A 0.15549  
429A -> 439A 0.12779  
430A -> 437A 0.28802  
430A -> 438A 0.11608  
430A -> 440A -0.10268  
431A -> 437A -0.20039  
431A -> 438A -0.27406  
431A -> 439A 0.11997  
431A -> 440A 0.25835  
432A -> 438A 0.30034  
429B -> 437B 0.10635  
429B -> 438B 0.15549

|              |          |
|--------------|----------|
| 429B -> 439B | 0.12779  |
| 430B -> 437B | 0.28802  |
| 430B -> 438B | 0.11608  |
| 430B -> 440B | -0.10268 |
| 431B -> 437B | -0.20039 |
| 431B -> 438B | -0.27406 |
| 431B -> 439B | 0.11997  |
| 431B -> 440B | 0.25835  |
| 432B -> 438B | 0.30034  |

Excited State 46: 1.000-A 1.2715 eV 975.11 nm f=0.0128 <S\*\*2>=0.000

|              |          |
|--------------|----------|
| 430A -> 440A | 0.11577  |
| 431A -> 437A | 0.40373  |
| 431A -> 438A | -0.12916 |
| 431A -> 439A | 0.13027  |
| 431A -> 440A | 0.13201  |
| 432A -> 439A | -0.31257 |
| 433A -> 438A | -0.17714 |
| 433A -> 439A | 0.11303  |
| 434A -> 437A | -0.23821 |
| 435A -> 440A | 0.12741  |
| 430B -> 440B | 0.11577  |
| 431B -> 437B | 0.40373  |
| 431B -> 438B | -0.12916 |
| 431B -> 439B | 0.13027  |
| 431B -> 440B | 0.13201  |
| 432B -> 439B | -0.31257 |
| 433B -> 438B | -0.17714 |
| 433B -> 439B | 0.11303  |
| 434B -> 437B | -0.23821 |
| 435B -> 440B | 0.12741  |

Excited State 47: 1.000-A 1.2948 eV 957.53 nm f=0.0059 <S\*\*2>=0.000

|              |          |
|--------------|----------|
| 429A -> 439A | 0.15201  |
| 429A -> 440A | -0.14137 |
| 431A -> 437A | 0.11011  |

|              |          |
|--------------|----------|
| 431A -> 438A | 0.36145  |
| 431A -> 439A | -0.33736 |
| 431A -> 440A | 0.31966  |
| 432A -> 438A | 0.16316  |
| 432A -> 440A | 0.15741  |
| 429B -> 439B | 0.15201  |
| 429B -> 440B | -0.14137 |
| 431B -> 437B | 0.11011  |
| 431B -> 438B | 0.36145  |
| 431B -> 439B | -0.33736 |
| 431B -> 440B | 0.31966  |
| 432B -> 438B | 0.16316  |
| 432B -> 440B | 0.15741  |

Excited State 48: 1.000-A 1.3257 eV 935.24 nm f=0.0357 <S\*\*2>=0.000

|              |          |
|--------------|----------|
| 430A -> 439A | -0.21473 |
| 431A -> 437A | -0.10123 |
| 431A -> 440A | -0.22297 |
| 432A -> 440A | 0.26893  |
| 433A -> 437A | -0.20805 |
| 433A -> 438A | -0.24356 |
| 433A -> 439A | 0.16310  |
| 433A -> 440A | -0.14296 |
| 434A -> 438A | -0.20127 |
| 435A -> 439A | -0.18207 |
| 435A -> 440A | 0.17944  |
| 436A -> 440A | 0.11831  |
| 430B -> 439B | -0.21473 |
| 431B -> 437B | -0.10123 |
| 431B -> 440B | -0.22297 |
| 432B -> 440B | 0.26893  |
| 433B -> 437B | -0.20805 |
| 433B -> 438B | -0.24356 |
| 433B -> 439B | 0.16310  |
| 433B -> 440B | -0.14296 |
| 434B -> 438B | -0.20127 |

435B -> 439B -0.18207  
435B -> 440B 0.17944  
436B -> 440B 0.11831

Excited State 49: 1.000-A 1.3847 eV 895.37 nm f=0.0084 <S\*\*2>=0.000

430A -> 437A 0.39430  
430A -> 438A -0.24837  
431A -> 439A 0.10189  
432A -> 437A 0.42696  
432A -> 438A -0.23170  
433A -> 440A 0.10879  
430B -> 437B 0.39430  
430B -> 438B -0.24837  
431B -> 439B 0.10189  
432B -> 437B 0.42696  
432B -> 438B -0.23170  
433B -> 440B 0.10879

Excited State 50: 3.000-A 1.3853 eV 894.97 nm f=0.0000 <S\*\*2>=2.000

430A -> 437A -0.50124  
430A -> 438A 0.16964  
432A -> 437A -0.27761  
432A -> 438A 0.34832  
430B -> 437B 0.50124  
430B -> 438B -0.16964  
432B -> 437B 0.27761  
432B -> 438B -0.34832

Excited State 51: 1.000-A 1.3927 eV 890.27 nm f=0.0198 <S\*\*2>=0.000

430A -> 437A -0.30581  
430A -> 438A -0.33302  
431A -> 439A 0.10965  
432A -> 437A 0.25441  
432A -> 438A 0.41093  
433A -> 440A 0.12509  
430B -> 437B -0.30581

430B -> 438B -0.33302  
 431B -> 439B 0.10965  
 432B -> 437B 0.25441  
 432B -> 438B 0.41093  
 433B -> 440B 0.12509

Excited State 52: 3.000-A 1.3967 eV 887.69 nm f=0.0000 <S\*\*2>=2.000

430A -> 437A -0.14070  
 430A -> 438A -0.52358  
 431A -> 438A -0.16578  
 432A -> 437A 0.27898  
 432A -> 438A 0.24562  
 430B -> 437B 0.14070  
 430B -> 438B 0.52358  
 431B -> 438B 0.16578  
 432B -> 437B -0.27898  
 432B -> 438B -0.24562

Excited State 53: 1.000-A 1.4160 eV 875.58 nm f=0.0016 <S\*\*2>=0.000

431A -> 437A 0.23339  
 432A -> 439A 0.54474  
 433A -> 438A -0.18681  
 434A -> 437A -0.12450  
 435A -> 440A 0.16259  
 436A -> 439A -0.12585  
 431B -> 437B 0.23339  
 432B -> 439B 0.54474  
 433B -> 438B -0.18681  
 434B -> 437B -0.12450  
 435B -> 440B 0.16259  
 436B -> 439B -0.12585

Excited State 54: 1.000-A 1.4359 eV 863.44 nm f=0.0482 <S\*\*2>=0.000

429A -> 437A 0.19639  
 429A -> 438A 0.10182  
 430A -> 437A 0.10748

|              |          |
|--------------|----------|
| 430A -> 438A | 0.24590  |
| 430A -> 439A | 0.13683  |
| 431A -> 438A | 0.33191  |
| 431A -> 439A | 0.14061  |
| 431A -> 440A | -0.20461 |
| 432A -> 438A | 0.16874  |
| 432A -> 439A | -0.10903 |
| 432A -> 440A | -0.23150 |
| 433A -> 440A | 0.13025  |
| 435A -> 438A | -0.13271 |
| 429B -> 437B | 0.19639  |
| 429B -> 438B | 0.10182  |
| 430B -> 437B | 0.10748  |
| 430B -> 438B | 0.24590  |
| 430B -> 439B | 0.13683  |
| 431B -> 438B | 0.33191  |
| 431B -> 439B | 0.14061  |
| 431B -> 440B | -0.20461 |
| 432B -> 438B | 0.16874  |
| 432B -> 439B | -0.10903 |
| 432B -> 440B | -0.23150 |
| 433B -> 440B | 0.13025  |
| 435B -> 438B | -0.13271 |

Excited State 55: 1.000-A 1.4448 eV 858.13 nm f=0.0567 <S\*\*2>=0.000

|              |          |
|--------------|----------|
| 430A -> 438A | 0.31641  |
| 430A -> 439A | -0.20083 |
| 431A -> 439A | 0.15269  |
| 432A -> 440A | 0.41322  |
| 433A -> 439A | -0.12035 |
| 433A -> 440A | 0.15797  |
| 434A -> 439A | -0.10762 |
| 435A -> 439A | 0.10801  |
| 430B -> 438B | 0.31641  |
| 430B -> 439B | -0.20083 |
| 431B -> 439B | 0.15269  |

432B -> 440B 0.41322  
433B -> 439B -0.12035  
433B -> 440B 0.15797  
434B -> 439B -0.10762  
435B -> 439B 0.10801

Excited State 56: 3.000-A 1.4483 eV 856.09 nm f=0.0000 <S\*\*2>=2.000

428A -> 439A -0.10377  
429A -> 437A -0.26307  
429A -> 438A -0.20062  
430A -> 439A -0.37463  
430A -> 440A 0.14511  
431A -> 438A -0.26172  
432A -> 440A -0.32561  
428B -> 439B 0.10377  
429B -> 437B 0.26307  
429B -> 438B 0.20062  
430B -> 439B 0.37463  
430B -> 440B -0.14511  
431B -> 438B 0.26172  
432B -> 440B 0.32561

Excited State 57: 3.000-A 1.4537 eV 852.86 nm f=0.0000 <S\*\*2>=2.000

429A -> 438A 0.24717  
430A -> 439A -0.24571  
430A -> 440A -0.40300  
431A -> 437A 0.16742  
432A -> 439A -0.33928  
432A -> 440A -0.16477  
429B -> 438B -0.24717  
430B -> 439B 0.24571  
430B -> 440B 0.40300  
431B -> 437B -0.16742  
432B -> 439B 0.33928  
432B -> 440B 0.16477



Excited State 58: 1.000-A 1.4586 eV 850.03 nm f=0.0902 <S\*\*2>=0.000

|              |          |
|--------------|----------|
| 429A -> 437A | 0.10080  |
| 430A -> 437A | -0.18631 |
| 430A -> 439A | 0.40578  |
| 431A -> 437A | -0.10633 |
| 431A -> 438A | 0.11898  |
| 431A -> 439A | 0.17955  |
| 431A -> 440A | 0.18751  |
| 432A -> 438A | -0.15116 |
| 432A -> 439A | 0.10979  |
| 432A -> 440A | 0.21943  |
| 434A -> 439A | -0.11043 |
| 434A -> 440A | -0.15281 |
| 436A -> 437A | -0.10816 |
| 429B -> 437B | 0.10080  |
| 430B -> 437B | -0.18631 |
| 430B -> 439B | 0.40578  |
| 431B -> 437B | -0.10633 |
| 431B -> 438B | 0.11898  |
| 431B -> 439B | 0.17955  |
| 431B -> 440B | 0.18751  |
| 432B -> 438B | -0.15116 |
| 432B -> 439B | 0.10979  |
| 432B -> 440B | 0.21943  |
| 434B -> 439B | -0.11043 |
| 434B -> 440B | -0.15281 |
| 436B -> 437B | -0.10816 |

Excited State 59: 1.000-A 1.4614 eV 848.39 nm f=0.0721 <S\*\*2>=0.000

|              |          |
|--------------|----------|
| 430A -> 437A | 0.20339  |
| 430A -> 438A | -0.13117 |
| 430A -> 439A | 0.38681  |
| 431A -> 439A | -0.13226 |
| 431A -> 440A | -0.21728 |
| 432A -> 437A | -0.11569 |
| 432A -> 438A | 0.11325  |

|              |          |
|--------------|----------|
| 432A -> 440A | 0.31626  |
| 434A -> 439A | 0.15859  |
| 434A -> 440A | 0.12457  |
| 436A -> 437A | 0.12396  |
| 430B -> 437B | 0.20339  |
| 430B -> 438B | -0.13117 |
| 430B -> 439B | 0.38681  |
| 431B -> 439B | -0.13226 |
| 431B -> 440B | -0.21728 |
| 432B -> 437B | -0.11569 |
| 432B -> 438B | 0.11325  |
| 432B -> 440B | 0.31626  |
| 434B -> 439B | 0.15859  |
| 434B -> 440B | 0.12457  |
| 436B -> 437B | 0.12396  |

Excited State 60: 3.000-A 1.4717 eV 842.46 nm f=0.0000 <S\*\*2>=2.000

|              |          |
|--------------|----------|
| 429A -> 437A | -0.36862 |
| 429A -> 438A | -0.23118 |
| 430A -> 439A | 0.23555  |
| 430A -> 440A | -0.28500 |
| 431A -> 438A | -0.23674 |
| 432A -> 439A | -0.13577 |
| 432A -> 440A | 0.24749  |
| 429B -> 437B | 0.36862  |
| 429B -> 438B | 0.23118  |
| 430B -> 439B | -0.23555 |
| 430B -> 440B | 0.28500  |
| 431B -> 438B | 0.23674  |
| 432B -> 439B | 0.13577  |
| 432B -> 440B | -0.24749 |

Excited State 61: 1.000-A 1.4811 eV 837.09 nm f=0.0100 <S\*\*2>=0.000

|              |          |
|--------------|----------|
| 429A -> 438A | -0.23441 |
| 430A -> 440A | 0.59235  |
| 431A -> 437A | -0.10669 |

432A -> 439A 0.18007  
429B -> 438B -0.23441  
430B -> 440B 0.59235  
431B -> 437B -0.10669  
432B -> 439B 0.18007

Excited State 62: 3.000-A 1.4862 eV 834.24 nm f=0.0000 <S\*\*2>=2.000

429A -> 437A 0.37035  
429A -> 438A -0.42462  
430A -> 440A -0.20215  
431A -> 437A -0.26294  
432A -> 439A -0.16992  
429B -> 437B -0.37035  
429B -> 438B 0.42462  
430B -> 440B 0.20215  
431B -> 437B 0.26294  
432B -> 439B 0.16992

Excited State 63: 1.000-A 1.5134 eV 819.24 nm f=0.0118 <S\*\*2>=0.000

429A -> 437A 0.56381  
429A -> 438A 0.18077  
429A -> 439A -0.11979  
430A -> 438A -0.12608  
430A -> 439A -0.17421  
431A -> 438A 0.10369  
429B -> 437B 0.56381  
429B -> 438B 0.18077  
429B -> 439B -0.11979  
430B -> 438B -0.12608  
430B -> 439B -0.17421  
431B -> 438B 0.10369

Excited State 64: 3.000-A 1.5204 eV 815.47 nm f=0.0000 <S\*\*2>=2.000

429A -> 439A -0.40596  
429A -> 440A 0.34909  
431A -> 439A -0.19441

431A -> 440A 0.35821  
429B -> 439B 0.40596  
429B -> 440B -0.34909  
431B -> 439B 0.19441  
431B -> 440B -0.35821

Excited State 65: 1.000-A 1.5370 eV 806.68 nm f=0.0145 <S\*\*2>=0.000

424A -> 437A 0.14563  
424A -> 438A -0.11281  
424A -> 439A -0.10150  
429A -> 437A -0.19622  
429A -> 438A 0.53222  
429A -> 440A 0.10410  
430A -> 440A 0.24681  
424B -> 437B 0.14563  
424B -> 438B -0.11281  
424B -> 439B -0.10150  
429B -> 437B -0.19622  
429B -> 438B 0.53222  
429B -> 440B 0.10410  
430B -> 440B 0.24681

Excited State 66: 3.000-A 1.5451 eV 802.44 nm f=0.0000 <S\*\*2>=2.000

427A -> 437A -0.10852  
429A -> 439A -0.38061  
429A -> 440A -0.43651  
431A -> 439A 0.29233  
431A -> 440A 0.16295  
427B -> 437B 0.10852  
429B -> 439B 0.38061  
429B -> 440B 0.43651  
431B -> 439B -0.29233  
431B -> 440B -0.16295

Excited State 67: 1.000-A 1.5527 eV 798.52 nm f=0.0070 <S\*\*2>=0.000

424A -> 437A 0.40521

|              |          |
|--------------|----------|
| 424A -> 438A | -0.31499 |
| 424A -> 439A | -0.28934 |
| 424A -> 440A | -0.21999 |
| 429A -> 437A | 0.11791  |
| 429A -> 438A | -0.13130 |
| 429A -> 439A | 0.14331  |
| 424B -> 437B | 0.40521  |
| 424B -> 438B | -0.31499 |
| 424B -> 439B | -0.28934 |
| 424B -> 440B | -0.21999 |
| 429B -> 437B | 0.11791  |
| 429B -> 438B | -0.13130 |
| 429B -> 439B | 0.14331  |

Excited State 68: 1.000-A 1.5617 eV 793.93 nm f=0.0232 <S\*\*2>=0.000

|              |          |
|--------------|----------|
| 422A -> 438A | 0.11505  |
| 429A -> 438A | 0.13251  |
| 429A -> 439A | 0.51524  |
| 429A -> 440A | -0.28757 |
| 431A -> 440A | -0.19525 |
| 422B -> 438B | 0.11505  |
| 429B -> 438B | 0.13251  |
| 429B -> 439B | 0.51524  |
| 429B -> 440B | -0.28757 |
| 431B -> 440B | -0.19525 |

Excited State 69: 1.000-A 1.5805 eV 784.48 nm f=0.0008 <S\*\*2>=0.000

|              |          |
|--------------|----------|
| 423A -> 437A | 0.39760  |
| 423A -> 438A | -0.17429 |
| 423A -> 439A | 0.32236  |
| 423A -> 440A | 0.24296  |
| 429A -> 439A | -0.10169 |
| 429A -> 440A | -0.27027 |
| 423B -> 437B | 0.39760  |
| 423B -> 438B | -0.17429 |
| 423B -> 439B | 0.32236  |

423B -> 440B 0.24296  
429B -> 439B -0.10169  
429B -> 440B -0.27027

Excited State 70: 1.000-A 1.5861 eV 781.71 nm f=0.0049 <S\*\*2>=0.000

425A -> 437A -0.24802  
425A -> 438A -0.32726  
425A -> 439A 0.38773  
425A -> 440A -0.36322  
425B -> 437B -0.24802  
425B -> 438B -0.32726  
425B -> 439B 0.38773  
425B -> 440B -0.36322

Excited State 71: 1.000-A 1.5915 eV 779.02 nm f=0.0199 <S\*\*2>=0.000

422A -> 437A 0.28520  
422A -> 438A 0.42681  
422A -> 439A 0.13195  
422A -> 440A -0.25427  
423A -> 437A -0.14680  
423A -> 439A -0.11399  
429A -> 439A -0.20472  
429A -> 440A -0.10227  
422B -> 437B 0.28520  
422B -> 438B 0.42681  
422B -> 439B 0.13195  
422B -> 440B -0.25427  
423B -> 437B -0.14680  
423B -> 439B -0.11399  
429B -> 439B -0.20472  
429B -> 440B -0.10227

Excited State 72: 1.000-A 1.5989 eV 775.42 nm f=0.0233 <S\*\*2>=0.000

422A -> 437A 0.13937  
422A -> 438A 0.17799  
422A -> 440A -0.10452

|              |          |
|--------------|----------|
| 423A -> 437A | 0.14709  |
| 423A -> 439A | 0.11754  |
| 429A -> 439A | 0.25094  |
| 429A -> 440A | 0.49084  |
| 430A -> 438A | 0.10749  |
| 431A -> 439A | -0.11161 |
| 422B -> 437B | 0.13937  |
| 422B -> 438B | 0.17799  |
| 422B -> 440B | -0.10452 |
| 423B -> 437B | 0.14709  |
| 423B -> 439B | 0.11754  |
| 429B -> 439B | 0.25094  |
| 429B -> 440B | 0.49084  |
| 430B -> 438B | 0.10749  |
| 431B -> 439B | -0.11161 |

Excited State 73: 3.000-A 1.6418 eV 755.16 nm f=0.0000 <S\*\*2>=2.000

|              |          |
|--------------|----------|
| 427A -> 439A | -0.17567 |
| 427A -> 440A | 0.23719  |
| 428A -> 439A | 0.38281  |
| 428A -> 440A | -0.39666 |
| 429A -> 438A | -0.11454 |
| 427B -> 439B | 0.17567  |
| 427B -> 440B | -0.23719 |
| 428B -> 439B | -0.38281 |
| 428B -> 440B | 0.39666  |
| 429B -> 438B | 0.11454  |

Excited State 74: 3.000-A 1.6615 eV 746.24 nm f=0.0000 <S\*\*2>=2.000

|              |          |
|--------------|----------|
| 427A -> 437A | 0.16807  |
| 427A -> 438A | 0.19974  |
| 427A -> 439A | -0.11352 |
| 427A -> 440A | -0.14031 |
| 428A -> 437A | -0.32772 |
| 428A -> 438A | -0.46267 |
| 428A -> 439A | -0.11346 |

|              |          |
|--------------|----------|
| 429A -> 440A | -0.13315 |
| 427B -> 437B | -0.16807 |
| 427B -> 438B | -0.19974 |
| 427B -> 439B | 0.11352  |
| 427B -> 440B | 0.14031  |
| 428B -> 437B | 0.32772  |
| 428B -> 438B | 0.46267  |
| 428B -> 439B | 0.11346  |
| 429B -> 440B | 0.13315  |

Excited State 75: 3.000-A 1.6627 eV 745.70 nm f=0.0000 <S\*\*2>=2.000

|              |          |
|--------------|----------|
| 427A -> 437A | 0.10171  |
| 427A -> 438A | -0.23048 |
| 427A -> 439A | -0.36611 |
| 427A -> 440A | -0.24185 |
| 428A -> 437A | 0.22106  |
| 428A -> 439A | -0.25874 |
| 428A -> 440A | -0.27660 |
| 429A -> 438A | -0.10685 |
| 427B -> 437B | -0.10171 |
| 427B -> 438B | 0.23048  |
| 427B -> 439B | 0.36611  |
| 427B -> 440B | 0.24185  |
| 428B -> 437B | -0.22106 |
| 428B -> 439B | 0.25874  |
| 428B -> 440B | 0.27660  |
| 429B -> 438B | 0.10685  |

Excited State 76: 3.000-A 1.6915 eV 732.98 nm f=0.0000 <S\*\*2>=2.000

|              |          |
|--------------|----------|
| 427A -> 437A | -0.43610 |
| 427A -> 438A | 0.17540  |
| 427A -> 439A | -0.16978 |
| 427A -> 440A | -0.11611 |
| 428A -> 437A | -0.31352 |
| 428A -> 438A | 0.22411  |
| 428A -> 439A | -0.12754 |



|              |          |
|--------------|----------|
| 428A -> 440A | -0.12053 |
| 429A -> 439A | 0.12325  |
| 429A -> 440A | 0.13024  |
| 427B -> 437B | 0.43610  |
| 427B -> 438B | -0.17540 |
| 427B -> 439B | 0.16978  |
| 427B -> 440B | 0.11611  |
| 428B -> 437B | 0.31352  |
| 428B -> 438B | -0.22411 |
| 428B -> 439B | 0.12754  |
| 428B -> 440B | 0.12053  |
| 429B -> 439B | -0.12325 |
| 429B -> 440B | -0.13024 |

Excited State 77: 1.000-A 1.7015 eV 728.70 nm f=0.0006 <S\*\*2>=0.000

|              |          |
|--------------|----------|
| 427A -> 438A | -0.22628 |
| 427A -> 440A | 0.10997  |
| 428A -> 437A | 0.43355  |
| 428A -> 438A | 0.40693  |
| 428A -> 439A | 0.13306  |
| 428A -> 440A | -0.20496 |
| 427B -> 438B | -0.22628 |
| 427B -> 440B | 0.10997  |
| 428B -> 437B | 0.43355  |
| 428B -> 438B | 0.40693  |
| 428B -> 439B | 0.13306  |
| 428B -> 440B | -0.20496 |

Excited State 78: 1.000-A 1.7159 eV 722.57 nm f=0.0014 <S\*\*2>=0.000

|              |          |
|--------------|----------|
| 427A -> 437A | 0.35457  |
| 427A -> 438A | -0.20975 |
| 427A -> 439A | -0.16979 |
| 427A -> 440A | -0.18143 |
| 428A -> 437A | 0.30867  |
| 428A -> 438A | -0.30462 |
| 428A -> 439A | -0.24965 |

427B -> 437B 0.35457  
427B -> 438B -0.20975  
427B -> 439B -0.16979  
427B -> 440B -0.18143  
428B -> 437B 0.30867  
428B -> 438B -0.30462  
428B -> 439B -0.24965

Excited State 79: 1.000-A 1.7390 eV 712.96 nm f=0.0010 <S\*\*2>=0.000

427A -> 437A 0.27032  
427A -> 439A 0.15760  
427A -> 440A 0.27182  
428A -> 438A -0.26485  
428A -> 439A 0.47990  
427B -> 437B 0.27032  
427B -> 439B 0.15760  
427B -> 440B 0.27182  
428B -> 438B -0.26485  
428B -> 439B 0.47990

Excited State 80: 1.000-A 1.7415 eV 711.95 nm f=0.0018 <S\*\*2>=0.000

427A -> 439A 0.37757  
428A -> 437A 0.21209  
428A -> 438A 0.10040  
428A -> 439A -0.10656  
428A -> 440A 0.50725  
427B -> 439B 0.37757  
428B -> 437B 0.21209  
428B -> 438B 0.10040  
428B -> 439B -0.10656  
428B -> 440B 0.50725

Excited State 81: 3.000-A 1.8244 eV 679.61 nm f=0.0000 <S\*\*2>=2.000

420A -> 437A 0.18579  
426A -> 439A -0.12029  
427A -> 437A 0.23344

|              |          |
|--------------|----------|
| 427A -> 438A | -0.17456 |
| 428A -> 437A | -0.38844 |
| 428A -> 438A | 0.27449  |
| 420B -> 437B | -0.18579 |
| 426B -> 439B | 0.12029  |
| 427B -> 437B | -0.23344 |
| 427B -> 438B | 0.17456  |
| 428B -> 437B | 0.38844  |
| 428B -> 438B | -0.27449 |

Excited State 82: 3.000-A 1.8414 eV 673.31 nm f=0.0000 <S\*\*2>=2.000

|              |          |
|--------------|----------|
| 417A -> 438A | 0.10930  |
| 419A -> 439A | 0.12666  |
| 419A -> 440A | -0.12666 |
| 420A -> 437A | 0.10927  |
| 420A -> 438A | 0.15580  |
| 427A -> 437A | -0.16642 |
| 427A -> 438A | -0.26218 |
| 428A -> 437A | -0.13864 |
| 428A -> 438A | -0.28058 |
| 428A -> 439A | 0.13688  |
| 428A -> 440A | -0.10215 |
| 417B -> 438B | -0.10930 |
| 419B -> 439B | -0.12666 |
| 419B -> 440B | 0.12666  |
| 420B -> 437B | -0.10927 |
| 420B -> 438B | -0.15580 |
| 427B -> 437B | 0.16642  |
| 427B -> 438B | 0.26218  |
| 428B -> 437B | 0.13864  |
| 428B -> 438B | 0.28058  |
| 428B -> 439B | -0.13688 |
| 428B -> 440B | 0.10215  |

Excited State 83: 3.000-A 1.8537 eV 668.84 nm f=0.0000 <S\*\*2>=2.000

|              |         |
|--------------|---------|
| 400A -> 437A | 0.15270 |
|--------------|---------|

|              |          |
|--------------|----------|
| 411A -> 437A | -0.11112 |
| 417A -> 439A | -0.12365 |
| 418A -> 437A | 0.15243  |
| 420A -> 439A | 0.17275  |
| 420A -> 440A | 0.14077  |
| 421A -> 437A | -0.13516 |
| 426A -> 437A | -0.21109 |
| 426A -> 438A | 0.10635  |
| 427A -> 437A | -0.10043 |
| 427A -> 438A | 0.10347  |
| 427A -> 439A | 0.10955  |
| 428A -> 437A | 0.10462  |
| 428A -> 438A | -0.10306 |
| 428A -> 439A | -0.19892 |
| 428A -> 440A | -0.18742 |
| 400B -> 437B | -0.15270 |
| 411B -> 437B | 0.11112  |
| 417B -> 439B | 0.12365  |
| 418B -> 437B | -0.15243 |
| 420B -> 439B | -0.17275 |
| 420B -> 440B | -0.14077 |
| 421B -> 437B | 0.13516  |
| 426B -> 437B | 0.21109  |
| 426B -> 438B | -0.10635 |
| 427B -> 437B | 0.10043  |
| 427B -> 438B | -0.10347 |
| 427B -> 439B | -0.10955 |
| 428B -> 437B | -0.10462 |
| 428B -> 438B | 0.10306  |
| 428B -> 439B | 0.19892  |
| 428B -> 440B | 0.18742  |

Excited State 84: 3.000-A 1.8583 eV 667.20 nm f=0.0000 <S\*\*2>=2.000

|              |         |
|--------------|---------|
| 399A -> 438A | 0.14166 |
| 401A -> 438A | 0.11849 |
| 410A -> 438A | 0.12663 |

|              |          |
|--------------|----------|
| 417A -> 437A | -0.12222 |
| 417A -> 438A | -0.18773 |
| 417A -> 440A | 0.13569  |
| 419A -> 438A | -0.11001 |
| 420A -> 438A | -0.11130 |
| 420A -> 439A | -0.11837 |
| 420A -> 440A | 0.13404  |
| 426A -> 438A | -0.14351 |
| 427A -> 440A | -0.13331 |
| 428A -> 439A | 0.13671  |
| 428A -> 440A | -0.16014 |
| 399B -> 438B | -0.14166 |
| 401B -> 438B | -0.11849 |
| 410B -> 438B | -0.12663 |
| 417B -> 437B | 0.12222  |
| 417B -> 438B | 0.18773  |
| 417B -> 440B | -0.13569 |
| 419B -> 438B | 0.11001  |
| 420B -> 438B | 0.11130  |
| 420B -> 439B | 0.11837  |
| 420B -> 440B | -0.13404 |
| 426B -> 438B | 0.14351  |
| 427B -> 440B | 0.13331  |
| 428B -> 439B | -0.13671 |
| 428B -> 440B | 0.16014  |

Excited State 85: 1.000-A 1.8589 eV 666.97 nm f=0.0026 <S\*\*2>=0.000

|              |          |
|--------------|----------|
| 427A -> 437A | 0.44668  |
| 427A -> 438A | -0.21384 |
| 428A -> 437A | -0.35893 |
| 428A -> 438A | 0.33575  |
| 427B -> 437B | 0.44668  |
| 427B -> 438B | -0.21384 |
| 428B -> 437B | -0.35893 |
| 428B -> 438B | 0.33575  |

Excited State 86: 3.000-A 1.8894 eV 656.22 nm f=0.0000 <S\*\*2>=2.000

|              |          |
|--------------|----------|
| 400A -> 439A | 0.13547  |
| 400A -> 440A | 0.10325  |
| 403A -> 437A | -0.11995 |
| 410A -> 437A | -0.10344 |
| 417A -> 437A | -0.17157 |
| 420A -> 437A | 0.13749  |
| 420A -> 438A | -0.11143 |
| 427A -> 437A | -0.26914 |
| 428A -> 437A | 0.17008  |
| 428A -> 438A | -0.14219 |
| 400B -> 439B | -0.13547 |
| 400B -> 440B | -0.10325 |
| 403B -> 437B | 0.11995  |
| 410B -> 437B | 0.10344  |
| 417B -> 437B | 0.17157  |
| 420B -> 437B | -0.13749 |
| 420B -> 438B | 0.11143  |
| 427B -> 437B | 0.26914  |
| 428B -> 437B | -0.17008 |
| 428B -> 438B | 0.14219  |

Excited State 87: 1.000-A 1.8975 eV 653.42 nm f=0.0085 <S\*\*2>=0.000

|              |         |
|--------------|---------|
| 427A -> 437A | 0.26638 |
| 427A -> 438A | 0.58102 |
| 428A -> 437A | 0.16420 |
| 428A -> 438A | 0.19086 |
| 427B -> 437B | 0.26638 |
| 427B -> 438B | 0.58102 |
| 428B -> 437B | 0.16420 |
| 428B -> 438B | 0.19086 |

Excited State 88: 3.000-A 1.9046 eV 650.96 nm f=0.0000 <S\*\*2>=2.000

|              |          |
|--------------|----------|
| 417A -> 438A | -0.12932 |
| 427A -> 437A | -0.21440 |
| 427A -> 438A | -0.43902 |

428A -> 437A -0.11856  
428A -> 438A -0.14011  
417B -> 438B 0.12932  
427B -> 437B 0.21440  
427B -> 438B 0.43902  
428B -> 437B 0.11856  
428B -> 438B 0.14011

Excited State 89: 3.000-A 1.9191 eV 646.04 nm f=0.0000 <S\*\*2>=2.000

400A -> 437A -0.12334  
411A -> 437A 0.11570  
413A -> 437A -0.10056  
427A -> 439A 0.28389  
427A -> 440A 0.21596  
428A -> 439A -0.32593  
428A -> 440A -0.29075  
400B -> 437B 0.12334  
411B -> 437B -0.11570  
413B -> 437B 0.10056  
427B -> 439B -0.28389  
427B -> 440B -0.21596  
428B -> 439B 0.32593  
428B -> 440B 0.29075

Excited State 90: 1.000-A 1.9270 eV 643.40 nm f=0.0009 <S\*\*2>=0.000

427A -> 439A 0.37963  
427A -> 440A 0.26555  
428A -> 439A -0.35752  
428A -> 440A -0.36311  
427B -> 439B 0.37963  
427B -> 440B 0.26555  
428B -> 439B -0.35752  
428B -> 440B -0.36311

Excited State 91: 3.000-A 1.9473 eV 636.71 nm f=0.0000 <S\*\*2>=2.000

426A -> 437A -0.15542

426A -> 438A -0.17375  
426A -> 439A 0.12669  
427A -> 439A 0.26667  
427A -> 440A -0.37333  
428A -> 439A 0.14888  
428A -> 440A -0.15683  
426B -> 437B 0.15542  
426B -> 438B 0.17375  
426B -> 439B -0.12669  
427B -> 439B -0.26667  
427B -> 440B 0.37333  
428B -> 439B -0.14888  
428B -> 440B 0.15683

Excited State 92: 1.000-A 1.9615 eV 632.09 nm f=0.0022 <S\*\*2>=0.000

427A -> 439A -0.34712  
427A -> 440A 0.52708  
428A -> 439A -0.18388  
428A -> 440A 0.21030  
427B -> 439B -0.34712  
427B -> 440B 0.52708  
428B -> 439B -0.18388  
428B -> 440B 0.21030

Excited State 93: 3.000-A 1.9752 eV 627.71 nm f=0.0000 <S\*\*2>=2.000

421A -> 438A 0.22204  
426A -> 437A -0.44836  
426A -> 438A -0.14394  
427A -> 439A -0.23627  
427A -> 440A 0.18093  
428A -> 440A 0.12354  
421B -> 438B -0.22204  
426B -> 437B 0.44836  
426B -> 438B 0.14394  
427B -> 439B 0.23627  
427B -> 440B -0.18093



428B -> 440B -0.12354

Excited State 94: 3.000-A 1.9826 eV 625.35 nm f=0.0000 <S\*\*2>=2.000

407A -> 439A -0.11576  
411A -> 437A -0.13465  
421A -> 437A 0.25914  
426A -> 437A 0.19580  
426A -> 438A -0.42366  
427A -> 440A 0.18056  
407B -> 439B 0.11576  
411B -> 437B 0.13465  
421B -> 437B -0.25914  
426B -> 437B -0.19580  
426B -> 438B 0.42366  
427B -> 440B -0.18056

Excited State 95: 3.000-A 1.9906 eV 622.84 nm f=0.0000 <S\*\*2>=2.000

407A -> 438A -0.10271  
411A -> 440A 0.13839  
413A -> 439A -0.10296  
421A -> 440A -0.21557  
426A -> 437A -0.13448  
426A -> 438A -0.17588  
426A -> 439A -0.40508  
426A -> 440A 0.16304  
407B -> 438B 0.10271  
411B -> 440B -0.13839  
413B -> 439B 0.10296  
421B -> 440B 0.21557  
426B -> 437B 0.13448  
426B -> 438B 0.17588  
426B -> 439B 0.40508  
426B -> 440B -0.16304

Excited State 96: 3.000-A 2.0021 eV 619.26 nm f=0.0000 <S\*\*2>=2.000

407A -> 437A 0.11768

|              |          |
|--------------|----------|
| 411A -> 439A | 0.18391  |
| 413A -> 440A | -0.12928 |
| 419A -> 440A | 0.11930  |
| 421A -> 437A | -0.13071 |
| 421A -> 438A | -0.11043 |
| 421A -> 439A | -0.13348 |
| 421A -> 440A | -0.14420 |
| 426A -> 438A | 0.13531  |
| 426A -> 439A | -0.31882 |
| 426A -> 440A | -0.20065 |
| 407B -> 437B | -0.11768 |
| 411B -> 439B | -0.18391 |
| 413B -> 440B | 0.12928  |
| 419B -> 440B | -0.11930 |
| 421B -> 437B | 0.13071  |
| 421B -> 438B | 0.11043  |
| 421B -> 439B | 0.13348  |
| 421B -> 440B | 0.14420  |
| 426B -> 438B | -0.13531 |
| 426B -> 439B | 0.31882  |
| 426B -> 440B | 0.20065  |

Excited State 97: 3.000-A 2.0073 eV 617.68 nm f=0.0000 <S\*\*2>=2.000

|              |          |
|--------------|----------|
| 411A -> 440A | 0.10212  |
| 413A -> 439A | -0.11904 |
| 419A -> 439A | 0.12052  |
| 421A -> 439A | -0.28314 |
| 426A -> 440A | -0.42366 |
| 411B -> 440B | -0.10212 |
| 413B -> 439B | 0.11904  |
| 419B -> 439B | -0.12052 |
| 421B -> 439B | 0.28314  |
| 426B -> 440B | 0.42366  |

Excited State 98: 1.000-A 2.0218 eV 613.24 nm f=0.0095 <S\*\*2>=0.000

|              |         |
|--------------|---------|
| 421A -> 437A | 0.14546 |
|--------------|---------|

421A -> 438A -0.22339  
425A -> 437A 0.10375  
426A -> 437A 0.61978  
421B -> 437B 0.14546  
421B -> 438B -0.22339  
425B -> 437B 0.10375  
426B -> 437B 0.61978

Excited State 99: 1.000-A 2.0483 eV 605.32 nm f=0.0008 <S\*\*2>=0.000

421A -> 437A -0.30424  
426A -> 438A 0.58313  
421B -> 437B -0.30424  
426B -> 438B 0.58313

Excited State 100: 3.000-A 2.0535 eV 603.76 nm f=0.0000 <S\*\*2>=2.000

402A -> 438A 0.12075  
404A -> 437A -0.12400  
404A -> 438A -0.13240  
405A -> 437A -0.10166  
405A -> 438A -0.18655  
405A -> 440A 0.11460  
406A -> 438A 0.11613  
409A -> 438A 0.14782  
410A -> 438A -0.10658  
412A -> 438A 0.10387  
415A -> 437A -0.18138  
415A -> 438A -0.19756  
415A -> 439A -0.10155  
415A -> 440A 0.10851  
421A -> 437A -0.10311  
421A -> 438A -0.10979  
402B -> 438B -0.12075  
404B -> 437B 0.12400  
404B -> 438B 0.13240  
405B -> 437B 0.10166  
405B -> 438B 0.18655

|              |          |
|--------------|----------|
| 405B -> 440B | -0.11460 |
| 406B -> 438B | -0.11613 |
| 409B -> 438B | -0.14782 |
| 410B -> 438B | 0.10658  |
| 412B -> 438B | -0.10387 |
| 415B -> 437B | 0.18138  |
| 415B -> 438B | 0.19756  |
| 415B -> 439B | 0.10155  |
| 415B -> 440B | -0.10851 |
| 421B -> 437B | 0.10311  |
| 421B -> 438B | 0.10979  |

Excited State 101: 3.000-A 2.0672 eV 599.78 nm f=0.0000 <S\*\*2>=2.000

|              |          |
|--------------|----------|
| 403A -> 437A | -0.15517 |
| 403A -> 439A | -0.15032 |
| 403A -> 440A | -0.10925 |
| 404A -> 437A | 0.15012  |
| 404A -> 438A | -0.10007 |
| 404A -> 439A | 0.13000  |
| 404A -> 440A | 0.12115  |
| 405A -> 437A | -0.17427 |
| 405A -> 439A | -0.13084 |
| 406A -> 437A | 0.15045  |
| 406A -> 439A | 0.11994  |
| 415A -> 437A | 0.17238  |
| 415A -> 438A | -0.12001 |
| 415A -> 439A | 0.15214  |
| 415A -> 440A | 0.14469  |
| 403B -> 437B | 0.15517  |
| 403B -> 439B | 0.15032  |
| 403B -> 440B | 0.10925  |
| 404B -> 437B | -0.15012 |
| 404B -> 438B | 0.10007  |
| 404B -> 439B | -0.13000 |
| 404B -> 440B | -0.12115 |
| 405B -> 437B | 0.17427  |

|              |          |
|--------------|----------|
| 405B -> 439B | 0.13084  |
| 406B -> 437B | -0.15045 |
| 406B -> 439B | -0.11994 |
| 415B -> 437B | -0.17238 |
| 415B -> 438B | 0.12001  |
| 415B -> 439B | -0.15214 |
| 415B -> 440B | -0.14469 |

Excited State 102: 3.000-A 2.0756 eV 597.35 nm f=0.0000 <S\*\*2>=2.000

|              |          |
|--------------|----------|
| 403A -> 437A | -0.13569 |
| 403A -> 438A | 0.10509  |
| 407A -> 437A | 0.11145  |
| 409A -> 437A | 0.15448  |
| 409A -> 438A | -0.11848 |
| 409A -> 439A | -0.10510 |
| 413A -> 437A | 0.12619  |
| 413A -> 439A | -0.10315 |
| 416A -> 437A | -0.14379 |
| 416A -> 438A | 0.10896  |
| 416A -> 439A | 0.10455  |
| 420A -> 437A | 0.12488  |
| 425A -> 437A | -0.18614 |
| 425A -> 438A | 0.14955  |
| 425A -> 439A | 0.10378  |
| 403B -> 437B | 0.13569  |
| 403B -> 438B | -0.10509 |
| 407B -> 437B | -0.11145 |
| 409B -> 437B | -0.15448 |
| 409B -> 438B | 0.11848  |
| 409B -> 439B | 0.10510  |
| 413B -> 437B | -0.12619 |
| 413B -> 439B | 0.10315  |
| 416B -> 437B | 0.14379  |
| 416B -> 438B | -0.10896 |
| 416B -> 439B | -0.10455 |
| 420B -> 437B | -0.12488 |

425B -> 437B 0.18614  
425B -> 438B -0.14955  
425B -> 439B -0.10378

Excited State 103: 1.000-A 2.0835 eV 595.09 nm f=0.0228 <S\*\*2>=0.000

421A -> 439A 0.17076  
421A -> 440A 0.21721  
425A -> 439A 0.13393  
426A -> 439A 0.54919  
426A -> 440A 0.12637  
421B -> 439B 0.17076  
421B -> 440B 0.21721  
425B -> 439B 0.13393  
426B -> 439B 0.54919  
426B -> 440B 0.12637

Excited State 104: 1.000-A 2.1002 eV 590.35 nm f=0.0225 <S\*\*2>=0.000

421A -> 439A 0.28212  
421A -> 440A -0.13511  
425A -> 437A -0.17967  
425A -> 438A 0.16445  
425A -> 440A 0.13382  
426A -> 439A -0.26410  
426A -> 440A 0.45021  
421B -> 439B 0.28212  
421B -> 440B -0.13511  
425B -> 437B -0.17967  
425B -> 438B 0.16445  
425B -> 440B 0.13382  
426B -> 439B -0.26410  
426B -> 440B 0.45021

Excited State 105: 3.000-A 2.1036 eV 589.39 nm f=0.0000 <S\*\*2>=2.000

425A -> 437A -0.41774  
425A -> 438A 0.33344  
425A -> 439A 0.20354

425A -> 440A 0.19289  
426A -> 437A 0.10586  
425B -> 437B 0.41774  
425B -> 438B -0.33344  
425B -> 439B -0.20354  
425B -> 440B -0.19289  
426B -> 437B -0.10586

Excited State 106: 1.000-A 2.1070 eV 588.44 nm f=0.0122 <S\*\*2>=0.000

421A -> 439A 0.18045  
425A -> 437A 0.42565  
425A -> 438A -0.33104  
425A -> 439A -0.18564  
425A -> 440A -0.16994  
426A -> 438A 0.11700  
426A -> 440A 0.27747  
421B -> 439B 0.18045  
425B -> 437B 0.42565  
425B -> 438B -0.33104  
425B -> 439B -0.18564  
425B -> 440B -0.16994  
426B -> 438B 0.11700  
426B -> 440B 0.27747

Excited State 107: 3.000-A 2.1331 eV 581.24 nm f=0.0000 <S\*\*2>=2.000

403A -> 437A 0.11405  
416A -> 437A 0.14313  
416A -> 438A -0.10992  
418A -> 437A -0.17405  
420A -> 437A 0.19570  
420A -> 438A -0.16467  
420A -> 439A -0.16455  
421A -> 437A -0.33150  
426A -> 438A -0.14340  
403B -> 437B -0.11405  
416B -> 437B -0.14313

|              |          |
|--------------|----------|
| 416B -> 438B | 0.10992  |
| 418B -> 437B | 0.17405  |
| 420B -> 437B | -0.19570 |
| 420B -> 438B | 0.16467  |
| 420B -> 439B | 0.16455  |
| 421B -> 437B | 0.33150  |
| 426B -> 438B | 0.14340  |

Excited State 108: 3.000-A 2.1397 eV 579.46 nm f=0.0000 <S\*\*2>=2.000

|              |          |
|--------------|----------|
| 418A -> 437A | -0.10243 |
| 420A -> 437A | -0.32405 |
| 421A -> 437A | -0.26504 |
| 421A -> 438A | -0.21412 |
| 426A -> 438A | -0.16682 |
| 427A -> 438A | -0.10089 |
| 418B -> 437B | 0.10243  |
| 420B -> 437B | 0.32405  |
| 421B -> 437B | 0.26504  |
| 421B -> 438B | 0.21412  |
| 426B -> 438B | 0.16682  |
| 427B -> 438B | 0.10089  |

Excited State 109: 3.000-A 2.1524 eV 576.03 nm f=0.0000 <S\*\*2>=2.000

|              |          |
|--------------|----------|
| 418A -> 437A | 0.12068  |
| 418A -> 438A | -0.10504 |
| 420A -> 437A | 0.14254  |
| 420A -> 438A | -0.24521 |
| 421A -> 437A | 0.16210  |
| 421A -> 438A | -0.35187 |
| 421A -> 439A | 0.10107  |
| 421A -> 440A | 0.12048  |
| 426A -> 437A | -0.17235 |
| 418B -> 437B | -0.12068 |
| 418B -> 438B | 0.10504  |
| 420B -> 437B | -0.14254 |
| 420B -> 438B | 0.24521  |



421B -> 437B -0.16210  
421B -> 438B 0.35187  
421B -> 439B -0.10107  
421B -> 440B -0.12048  
426B -> 437B 0.17235

Excited State 110: 1.000-A 2.1535 eV 575.73 nm f=0.0049 <S\*\*2>=0.000

418A -> 437A 0.19364  
420A -> 437A -0.27234  
420A -> 438A 0.15288  
421A -> 437A 0.43101  
421A -> 438A -0.13307  
422A -> 437A -0.11980  
423A -> 437A 0.12301  
426A -> 437A -0.13714  
426A -> 438A 0.22675  
418B -> 437B 0.19364  
420B -> 437B -0.27234  
420B -> 438B 0.15288  
421B -> 437B 0.43101  
421B -> 438B -0.13307  
422B -> 437B -0.11980  
423B -> 437B 0.12301  
426B -> 437B -0.13714  
426B -> 438B 0.22675

Excited State 111: 1.000-A 2.1602 eV 573.95 nm f=0.0534 <S\*\*2>=0.000

417A -> 438A 0.14606  
419A -> 437A 0.12865  
420A -> 437A 0.48698  
421A -> 437A 0.30933  
421A -> 438A 0.14283  
426A -> 438A 0.17400  
417B -> 438B 0.14606  
419B -> 437B 0.12865  
420B -> 437B 0.48698

421B -> 437B 0.30933  
421B -> 438B 0.14283  
426B -> 438B 0.17400

Excited State 112: 3.000-A 2.1620 eV 573.46 nm f=0.0000 <S\*\*2>=2.000

414A -> 439A -0.10338  
414A -> 440A 0.10682  
419A -> 437A 0.12590  
419A -> 438A 0.16348  
419A -> 439A -0.19873  
419A -> 440A 0.18080  
420A -> 437A -0.16044  
420A -> 438A -0.28479  
420A -> 440A -0.10425  
421A -> 437A 0.10023  
421A -> 438A 0.19565  
421A -> 439A -0.15229  
421A -> 440A 0.13876  
414B -> 439B 0.10338  
414B -> 440B -0.10682  
419B -> 437B -0.12590  
419B -> 438B -0.16348  
419B -> 439B 0.19873  
419B -> 440B -0.18080  
420B -> 437B 0.16044  
420B -> 438B 0.28479  
420B -> 440B 0.10425  
421B -> 437B -0.10023  
421B -> 438B -0.19565  
421B -> 439B 0.15229  
421B -> 440B -0.13876

Excited State 113: 1.000-A 2.1740 eV 570.30 nm f=0.0007 <S\*\*2>=0.000

417A -> 437A 0.13424  
419A -> 438A 0.14049  
420A -> 437A -0.10241

|              |          |
|--------------|----------|
| 420A -> 438A | 0.25598  |
| 421A -> 438A | 0.50782  |
| 422A -> 438A | -0.10257 |
| 426A -> 437A | 0.17903  |
| 417B -> 437B | 0.13424  |
| 419B -> 438B | 0.14049  |
| 420B -> 437B | -0.10241 |
| 420B -> 438B | 0.25598  |
| 421B -> 438B | 0.50782  |
| 422B -> 438B | -0.10257 |
| 426B -> 437B | 0.17903  |

Excited State 114: 3.000-A 2.1860 eV 567.18 nm f=0.0000 <S\*\*2>=2.000

|              |          |
|--------------|----------|
| 400A -> 437A | 0.12307  |
| 408A -> 437A | 0.12459  |
| 418A -> 439A | -0.11945 |
| 420A -> 439A | -0.36429 |
| 420A -> 440A | -0.11997 |
| 421A -> 437A | 0.20184  |
| 421A -> 439A | -0.14843 |
| 421A -> 440A | -0.13293 |
| 426A -> 437A | -0.13528 |
| 426A -> 438A | 0.20222  |
| 400B -> 437B | -0.12307 |
| 408B -> 437B | -0.12459 |
| 418B -> 439B | 0.11945  |
| 420B -> 439B | 0.36429  |
| 420B -> 440B | 0.11997  |
| 421B -> 437B | -0.20184 |
| 421B -> 439B | 0.14843  |
| 421B -> 440B | 0.13293  |
| 426B -> 437B | 0.13528  |
| 426B -> 438B | -0.20222 |

Excited State 115: 1.000-A 2.1866 eV 567.02 nm f=0.0153 <S\*\*2>=0.000

|              |         |
|--------------|---------|
| 417A -> 437A | 0.14190 |
|--------------|---------|

|              |          |
|--------------|----------|
| 417A -> 438A | 0.12358  |
| 419A -> 439A | 0.10306  |
| 420A -> 437A | 0.23077  |
| 420A -> 438A | 0.48633  |
| 421A -> 438A | -0.18410 |
| 423A -> 438A | -0.10222 |
| 426A -> 438A | -0.13096 |
| 417B -> 437B | 0.14190  |
| 417B -> 438B | 0.12358  |
| 419B -> 439B | 0.10306  |
| 420B -> 437B | 0.23077  |
| 420B -> 438B | 0.48633  |
| 421B -> 438B | -0.18410 |
| 423B -> 438B | -0.10222 |
| 426B -> 438B | -0.13096 |

Excited State 116: 3.000-A 2.1972 eV 564.29 nm f=0.0000 <S\*\*2>=2.000

|              |          |
|--------------|----------|
| 399A -> 438A | 0.10322  |
| 418A -> 439A | -0.10046 |
| 419A -> 439A | -0.15760 |
| 420A -> 437A | 0.18770  |
| 420A -> 438A | 0.11740  |
| 420A -> 439A | 0.12744  |
| 420A -> 440A | -0.21262 |
| 421A -> 438A | -0.24295 |
| 421A -> 439A | -0.18650 |
| 426A -> 437A | -0.13250 |
| 426A -> 438A | -0.15013 |
| 426A -> 439A | 0.12193  |
| 426A -> 440A | 0.13455  |
| 399B -> 438B | -0.10322 |
| 418B -> 439B | 0.10046  |
| 419B -> 439B | 0.15760  |
| 420B -> 437B | -0.18770 |
| 420B -> 438B | -0.11740 |
| 420B -> 439B | -0.12744 |

|              |          |
|--------------|----------|
| 420B -> 440B | 0.21262  |
| 421B -> 438B | 0.24295  |
| 421B -> 439B | 0.18650  |
| 426B -> 437B | 0.13250  |
| 426B -> 438B | 0.15013  |
| 426B -> 439B | -0.12193 |
| 426B -> 440B | -0.13455 |

Excited State 117: 3.000-A 2.2110 eV 560.76 nm  $f=0.0000$   $\langle S^{*2} \rangle = 2.000$

|              |          |
|--------------|----------|
| 418A -> 439A | -0.10437 |
| 420A -> 437A | 0.19655  |
| 420A -> 440A | 0.27281  |
| 421A -> 438A | 0.10555  |
| 421A -> 439A | -0.34275 |
| 426A -> 437A | 0.12838  |
| 426A -> 439A | 0.11343  |
| 426A -> 440A | 0.25027  |
| 418B -> 439B | 0.10437  |
| 420B -> 437B | -0.19655 |
| 420B -> 440B | -0.27281 |
| 421B -> 438B | -0.10555 |
| 421B -> 439B | 0.34275  |
| 426B -> 437B | -0.12838 |
| 426B -> 439B | -0.11343 |
| 426B -> 440B | -0.25027 |

Excited State 118: 1.000-A 2.2167 eV 559.32 nm  $f=0.0048$   $\langle S^{*2} \rangle = 0.000$

|              |          |
|--------------|----------|
| 418A -> 439A | 0.19935  |
| 419A -> 439A | 0.16831  |
| 421A -> 439A | 0.46862  |
| 422A -> 439A | -0.11602 |
| 423A -> 439A | 0.10882  |
| 426A -> 439A | -0.10708 |
| 426A -> 440A | -0.36638 |
| 418B -> 439B | 0.19935  |
| 419B -> 439B | 0.16831  |

421B -> 439B 0.46862  
422B -> 439B -0.11602  
423B -> 439B 0.10882  
426B -> 439B -0.10708  
426B -> 440B -0.36638

Excited State 119: 3.000-A 2.2177 eV 559.06 nm f=0.0000 <S\*\*2>=2.000

418A -> 440A -0.10092  
419A -> 440A -0.13156  
420A -> 438A -0.26322  
420A -> 439A 0.20538  
420A -> 440A -0.11573  
421A -> 440A -0.40144  
426A -> 439A 0.20926  
418B -> 440B 0.10092  
419B -> 440B 0.13156  
420B -> 438B 0.26322  
420B -> 439B -0.20538  
420B -> 440B 0.11573  
421B -> 440B 0.40144  
426B -> 439B -0.20926

Excited State 120: 1.000-A 2.2237 eV 557.56 nm f=0.0066 <S\*\*2>=0.000

417A -> 439A -0.14012  
418A -> 437A 0.30917  
418A -> 438A -0.10427  
420A -> 437A 0.10303  
420A -> 438A -0.13001  
420A -> 439A 0.44729  
420A -> 440A 0.20899  
417B -> 439B -0.14012  
418B -> 437B 0.30917  
418B -> 438B -0.10427  
420B -> 437B 0.10303  
420B -> 438B -0.13001  
420B -> 439B 0.44729

420B -> 440B 0.20899

Excited State 121: 1.000-A 2.2413 eV 553.18 nm f=0.0006 <S\*\*2>=0.000

416A -> 437A -0.14230

416A -> 438A 0.13194

418A -> 440A 0.13847

419A -> 437A 0.14409

419A -> 439A -0.14655

419A -> 440A 0.13626

420A -> 438A 0.10593

421A -> 440A 0.46528

422A -> 440A -0.11400

423A -> 440A 0.11642

424A -> 440A 0.12166

426A -> 439A -0.19840

416B -> 437B -0.14230

416B -> 438B 0.13194

418B -> 440B 0.13847

419B -> 437B 0.14409

419B -> 439B -0.14655

419B -> 440B 0.13626

420B -> 438B 0.10593

421B -> 440B 0.46528

422B -> 440B -0.11400

423B -> 440B 0.11642

424B -> 440B 0.12166

426B -> 439B -0.19840

Excited State 122: 1.000-A 2.2419 eV 553.02 nm f=0.0028 <S\*\*2>=0.000

416A -> 437A 0.15333

416A -> 438A -0.15745

416A -> 440A -0.12039

417A -> 438A -0.12065

419A -> 437A -0.24514

419A -> 439A 0.17262

420A -> 439A -0.26679

|              |          |
|--------------|----------|
| 420A -> 440A | 0.25309  |
| 421A -> 440A | 0.27830  |
| 426A -> 439A | -0.13492 |
| 416B -> 437B | 0.15333  |
| 416B -> 438B | -0.15745 |
| 416B -> 440B | -0.12039 |
| 417B -> 438B | -0.12065 |
| 419B -> 437B | -0.24514 |
| 419B -> 439B | 0.17262  |
| 420B -> 439B | -0.26679 |
| 420B -> 440B | 0.25309  |
| 421B -> 440B | 0.27830  |
| 426B -> 439B | -0.13492 |

Excited State 123: 3.000-A 2.2427 eV 552.83 nm  $f=0.0000$   $\langle S^2 \rangle = 2.000$

|              |          |
|--------------|----------|
| 399A -> 439A | -0.11249 |
| 399A -> 440A | 0.10989  |
| 404A -> 440A | 0.10638  |
| 419A -> 437A | 0.10375  |
| 419A -> 438A | 0.11905  |
| 420A -> 439A | -0.10759 |
| 420A -> 440A | 0.11954  |
| 421A -> 439A | 0.13949  |
| 421A -> 440A | -0.21289 |
| 426A -> 439A | 0.17331  |
| 426A -> 440A | -0.18918 |
| 399B -> 439B | 0.11249  |
| 399B -> 440B | -0.10989 |
| 404B -> 440B | -0.10638 |
| 419B -> 437B | -0.10375 |
| 419B -> 438B | -0.11905 |
| 420B -> 439B | 0.10759  |
| 420B -> 440B | -0.11954 |
| 421B -> 439B | -0.13949 |
| 421B -> 440B | 0.21289  |
| 426B -> 439B | -0.17331 |



426B -> 440B 0.18918

Excited State 124: 3.000-A 2.2485 eV 551.41 nm f=0.0000 <S\*\*2>=2.000

395A -> 437A 0.17040

395A -> 438A -0.13400

395A -> 439A -0.12455

403A -> 437A 0.14042

403A -> 438A -0.10952

416A -> 437A -0.28138

416A -> 438A 0.20619

416A -> 439A 0.19656

416A -> 440A 0.13539

417A -> 437A -0.13578

419A -> 437A 0.13176

419A -> 438A -0.10728

395B -> 437B -0.17040

395B -> 438B 0.13400

395B -> 439B 0.12455

403B -> 437B -0.14042

403B -> 438B 0.10952

416B -> 437B 0.28138

416B -> 438B -0.20619

416B -> 439B -0.19656

416B -> 440B -0.13539

417B -> 437B 0.13578

419B -> 437B -0.13176

419B -> 438B 0.10728

Excited State 125: 1.000-A 2.2502 eV 551.00 nm f=0.0078 <S\*\*2>=0.000

416A -> 437A 0.30072

416A -> 438A -0.18712

416A -> 439A -0.21747

416A -> 440A -0.12495

417A -> 437A 0.13939

419A -> 438A 0.18090

419A -> 440A 0.12876

|              |          |
|--------------|----------|
| 420A -> 440A | -0.26193 |
| 424A -> 437A | 0.15171  |
| 424A -> 438A | 0.21416  |
| 424A -> 439A | -0.13839 |
| 424A -> 440A | 0.15752  |
| 416B -> 437B | 0.30072  |
| 416B -> 438B | -0.18712 |
| 416B -> 439B | -0.21747 |
| 416B -> 440B | -0.12495 |
| 417B -> 437B | 0.13939  |
| 419B -> 438B | 0.18090  |
| 419B -> 440B | 0.12876  |
| 420B -> 440B | -0.26193 |
| 424B -> 437B | 0.15171  |
| 424B -> 438B | 0.21416  |
| 424B -> 439B | -0.13839 |
| 424B -> 440B | 0.15752  |

Excited State 126: 1.000-A 2.2533 eV 550.24 nm  $f=0.0041$   $\langle S^{*2} \rangle = 0.000$

|              |          |
|--------------|----------|
| 416A -> 437A | -0.12989 |
| 416A -> 439A | 0.10371  |
| 419A -> 438A | -0.12231 |
| 419A -> 440A | -0.11791 |
| 420A -> 440A | 0.17593  |
| 421A -> 440A | -0.13911 |
| 424A -> 437A | 0.26358  |
| 424A -> 438A | 0.39559  |
| 424A -> 439A | -0.24628 |
| 424A -> 440A | 0.23865  |
| 416B -> 437B | -0.12989 |
| 416B -> 439B | 0.10371  |
| 419B -> 438B | -0.12231 |
| 419B -> 440B | -0.11791 |
| 420B -> 440B | 0.17593  |
| 421B -> 440B | -0.13911 |
| 424B -> 437B | 0.26358  |

424B -> 438B 0.39559  
424B -> 439B -0.24628  
424B -> 440B 0.23865

Excited State 127: 3.000-A 2.2537 eV 550.13 nm f=0.0000 <S\*\*2>=2.000

424A -> 437A 0.30951  
424A -> 438A 0.44714  
424A -> 439A -0.28442  
424A -> 440A 0.29266  
424B -> 437B -0.30951  
424B -> 438B -0.44714  
424B -> 439B 0.28442  
424B -> 440B -0.29266

Excited State 128: 3.000-A 2.2665 eV 547.02 nm f=0.0000 <S\*\*2>=2.000

400A -> 437A -0.14386  
400A -> 439A -0.11918  
402A -> 437A 0.13892  
402A -> 439A 0.11402  
404A -> 439A 0.11528  
412A -> 437A -0.14066  
417A -> 437A -0.19404  
417A -> 439A -0.11392  
418A -> 437A 0.15149  
418A -> 439A 0.10582  
420A -> 437A -0.10851  
420A -> 438A 0.11572  
420A -> 439A -0.12357  
420A -> 440A -0.16858  
400B -> 437B 0.14386  
400B -> 439B 0.11918  
402B -> 437B -0.13892  
402B -> 439B -0.11402  
404B -> 439B -0.11528  
412B -> 437B 0.14066  
417B -> 437B 0.19404

417B -> 439B 0.11392  
418B -> 437B -0.15149  
418B -> 439B -0.10582  
420B -> 437B 0.10851  
420B -> 438B -0.11572  
420B -> 439B 0.12357  
420B -> 440B 0.16858

Excited State 129: 3.000-A 2.2736 eV 545.33 nm f=0.0000 <S\*\*2>=2.000

401A -> 437A -0.12556  
401A -> 438A -0.19154  
401A -> 440A 0.12619  
404A -> 437A -0.11236  
405A -> 438A -0.12402  
412A -> 438A -0.15213  
413A -> 438A 0.13767  
417A -> 438A -0.18044  
418A -> 437A -0.12297  
423A -> 437A -0.13688  
423A -> 438A -0.23528  
401B -> 437B 0.12556  
401B -> 438B 0.19154  
401B -> 440B -0.12619  
404B -> 437B 0.11236  
405B -> 438B 0.12402  
412B -> 438B 0.15213  
413B -> 438B -0.13767  
417B -> 438B 0.18044  
418B -> 437B 0.12297  
423B -> 437B 0.13688  
423B -> 438B 0.23528

Excited State 130: 1.000-A 2.2842 eV 542.78 nm f=0.0026 <S\*\*2>=0.000

412A -> 438A -0.13026  
415A -> 437A 0.16999  
415A -> 438A 0.15176

418A -> 437A -0.13210  
418A -> 438A -0.15940  
423A -> 437A 0.26974  
423A -> 438A 0.44735  
423A -> 440A -0.16211  
412B -> 438B -0.13026  
415B -> 437B 0.16999  
415B -> 438B 0.15176  
418B -> 437B -0.13210  
418B -> 438B -0.15940  
423B -> 437B 0.26974  
423B -> 438B 0.44735  
423B -> 440B -0.16211

Excited State 131: 3.000-A 2.2870 eV 542.12 nm f=0.0000 <S\*\*2>=2.000

418A -> 437A 0.15827  
420A -> 438A -0.11238  
421A -> 438A 0.11724  
423A -> 437A -0.29959  
423A -> 438A -0.46997  
423A -> 440A 0.17999  
418B -> 437B -0.15827  
420B -> 438B 0.11238  
421B -> 438B -0.11724  
423B -> 437B 0.29959  
423B -> 438B 0.46997  
423B -> 440B -0.17999

Excited State 132: 1.000-A 2.2873 eV 542.06 nm f=0.0226 <S\*\*2>=0.000

414A -> 437A -0.10540  
414A -> 438A -0.14961  
414A -> 439A 0.18720  
414A -> 440A -0.17961  
415A -> 437A -0.12820  
417A -> 437A 0.11211  
418A -> 437A 0.14882

|              |          |
|--------------|----------|
| 418A -> 438A | 0.21519  |
| 418A -> 439A | -0.15154 |
| 418A -> 440A | 0.10852  |
| 419A -> 438A | -0.11777 |
| 419A -> 439A | 0.12937  |
| 419A -> 440A | -0.11019 |
| 420A -> 439A | 0.10286  |
| 420A -> 440A | -0.16521 |
| 423A -> 438A | 0.17017  |
| 414B -> 437B | -0.10540 |
| 414B -> 438B | -0.14961 |
| 414B -> 439B | 0.18720  |
| 414B -> 440B | -0.17961 |
| 415B -> 437B | -0.12820 |
| 417B -> 437B | 0.11211  |
| 418B -> 437B | 0.14882  |
| 418B -> 438B | 0.21519  |
| 418B -> 439B | -0.15154 |
| 418B -> 440B | 0.10852  |
| 419B -> 438B | -0.11777 |
| 419B -> 439B | 0.12937  |
| 419B -> 440B | -0.11019 |
| 420B -> 439B | 0.10286  |
| 420B -> 440B | -0.16521 |
| 423B -> 438B | 0.17017  |

Excited State 133: 1.000-A 2.2885 eV 541.77 nm  $f=0.0055$   $\langle S^2 \rangle=0.000$

|              |          |
|--------------|----------|
| 412A -> 438A | 0.18713  |
| 412A -> 440A | -0.12553 |
| 415A -> 437A | -0.25770 |
| 415A -> 438A | -0.15554 |
| 415A -> 439A | -0.16429 |
| 417A -> 438A | -0.15161 |
| 418A -> 440A | -0.11171 |
| 419A -> 437A | 0.13677  |
| 420A -> 438A | 0.10400  |

|              |          |
|--------------|----------|
| 423A -> 437A | 0.15589  |
| 423A -> 438A | 0.27012  |
| 423A -> 440A | -0.11342 |
| 425A -> 437A | -0.13383 |
| 425A -> 438A | -0.10798 |
| 425A -> 439A | -0.13447 |
| 412B -> 438B | 0.18713  |
| 412B -> 440B | -0.12553 |
| 415B -> 437B | -0.25770 |
| 415B -> 438B | -0.15554 |
| 415B -> 439B | -0.16429 |
| 417B -> 438B | -0.15161 |
| 418B -> 440B | -0.11171 |
| 419B -> 437B | 0.13677  |
| 420B -> 438B | 0.10400  |
| 423B -> 437B | 0.15589  |
| 423B -> 438B | 0.27012  |
| 423B -> 440B | -0.11342 |
| 425B -> 437B | -0.13383 |
| 425B -> 438B | -0.10798 |
| 425B -> 439B | -0.13447 |

Excited State 134: 3.000-A 2.2911 eV 541.15 nm f=0.0000 <S\*\*2>=2.000

|              |          |
|--------------|----------|
| 425A -> 437A | -0.42127 |
| 425A -> 438A | -0.31394 |
| 425A -> 439A | -0.41553 |
| 425A -> 440A | 0.11128  |
| 425B -> 437B | 0.42127  |
| 425B -> 438B | 0.31394  |
| 425B -> 439B | 0.41553  |
| 425B -> 440B | -0.11128 |

Excited State 135: 1.000-A 2.2927 eV 540.79 nm f=0.0006 <S\*\*2>=0.000

|              |          |
|--------------|----------|
| 415A -> 438A | -0.11039 |
| 417A -> 437A | -0.10030 |
| 425A -> 437A | 0.37366  |

|              |          |
|--------------|----------|
| 425A -> 438A | 0.28728  |
| 425A -> 439A | 0.39142  |
| 425A -> 440A | -0.10439 |
| 415B -> 438B | -0.11039 |
| 417B -> 437B | -0.10030 |
| 425B -> 437B | 0.37366  |
| 425B -> 438B | 0.28728  |
| 425B -> 439B | 0.39142  |
| 425B -> 440B | -0.10439 |

Excited State 136: 3.000-A 2.2936 eV 540.56 nm f=0.0000 <S\*\*2>=2.000

|              |          |
|--------------|----------|
| 406A -> 437A | -0.13273 |
| 413A -> 437A | -0.12780 |
| 417A -> 437A | -0.24289 |
| 417A -> 438A | 0.14874  |
| 418A -> 437A | -0.26688 |
| 418A -> 438A | 0.11066  |
| 418A -> 439A | 0.14698  |
| 419A -> 437A | -0.19827 |
| 419A -> 438A | 0.11933  |
| 423A -> 438A | -0.11548 |
| 406B -> 437B | 0.13273  |
| 413B -> 437B | 0.12780  |
| 417B -> 437B | 0.24289  |
| 417B -> 438B | -0.14874 |
| 418B -> 437B | 0.26688  |
| 418B -> 438B | -0.11066 |
| 418B -> 439B | -0.14698 |
| 419B -> 437B | 0.19827  |
| 419B -> 438B | -0.11933 |
| 423B -> 438B | 0.11548  |

Excited State 137: 1.000-A 2.2943 eV 540.39 nm f=0.0035 <S\*\*2>=0.000

|              |          |
|--------------|----------|
| 412A -> 437A | -0.19640 |
| 412A -> 439A | -0.14097 |
| 415A -> 437A | -0.21111 |



|              |          |
|--------------|----------|
| 415A -> 438A | 0.15729  |
| 415A -> 439A | -0.17983 |
| 415A -> 440A | -0.16196 |
| 417A -> 437A | 0.27114  |
| 417A -> 438A | -0.10028 |
| 417A -> 439A | 0.13144  |
| 420A -> 440A | 0.15864  |
| 422A -> 437A | 0.11527  |
| 425A -> 437A | 0.12002  |
| 425A -> 439A | 0.10681  |
| 412B -> 437B | -0.19640 |
| 412B -> 439B | -0.14097 |
| 415B -> 437B | -0.21111 |
| 415B -> 438B | 0.15729  |
| 415B -> 439B | -0.17983 |
| 415B -> 440B | -0.16196 |
| 417B -> 437B | 0.27114  |
| 417B -> 438B | -0.10028 |
| 417B -> 439B | 0.13144  |
| 420B -> 440B | 0.15864  |
| 422B -> 437B | 0.11527  |
| 425B -> 437B | 0.12002  |
| 425B -> 439B | 0.10681  |

Excited State 138: 3.000-A 2.2999 eV 539.09 nm  $f=0.0000$   $\langle S^2 \rangle=2.000$

|              |          |
|--------------|----------|
| 410A -> 438A | -0.10059 |
| 412A -> 437A | -0.13077 |
| 415A -> 438A | 0.14760  |
| 415A -> 440A | -0.11254 |
| 417A -> 437A | 0.14797  |
| 417A -> 438A | 0.11942  |
| 418A -> 437A | -0.25766 |
| 418A -> 438A | -0.30052 |
| 420A -> 440A | 0.15439  |
| 423A -> 438A | -0.11082 |
| 410B -> 438B | 0.10059  |

412B -> 437B 0.13077  
 415B -> 438B -0.14760  
 415B -> 440B 0.11254  
 417B -> 437B -0.14797  
 417B -> 438B -0.11942  
 418B -> 437B 0.25766  
 418B -> 438B 0.30052  
 420B -> 440B -0.15439  
 423B -> 438B 0.11082

Excited State 139: 1.000-A 2.3015 eV 538.71 nm f=0.0003 <S\*\*2>=0.000

421A -> 437A 0.12939  
 422A -> 437A 0.51078  
 422A -> 438A -0.30972  
 422A -> 439A 0.20868  
 422A -> 440A 0.19166  
 421B -> 437B 0.12939  
 422B -> 437B 0.51078  
 422B -> 438B -0.30972  
 422B -> 439B 0.20868  
 422B -> 440B 0.19166

Excited State 140: 3.000-A 2.3018 eV 538.65 nm f=0.0000 <S\*\*2>=2.000

421A -> 437A -0.12938  
 422A -> 437A -0.51936  
 422A -> 438A 0.31048  
 422A -> 439A -0.20803  
 422A -> 440A -0.19122  
 421B -> 437B 0.12938  
 422B -> 437B 0.51936  
 422B -> 438B -0.31048  
 422B -> 439B 0.20803  
 422B -> 440B 0.19122

Excited State 141: 3.000-A 2.3046 eV 537.98 nm f=0.0000 <S\*\*2>=2.000

393A -> 437A 0.12301

|              |          |
|--------------|----------|
| 405A -> 438A | 0.11009  |
| 412A -> 438A | 0.17253  |
| 412A -> 440A | -0.14692 |
| 415A -> 437A | -0.24588 |
| 415A -> 438A | -0.10816 |
| 415A -> 439A | -0.16353 |
| 417A -> 438A | -0.19096 |
| 418A -> 437A | -0.15116 |
| 418A -> 439A | 0.10160  |
| 418A -> 440A | -0.12159 |
| 393B -> 437B | -0.12301 |
| 405B -> 438B | -0.11009 |
| 412B -> 438B | -0.17253 |
| 412B -> 440B | 0.14692  |
| 415B -> 437B | 0.24588  |
| 415B -> 438B | 0.10816  |
| 415B -> 439B | 0.16353  |
| 417B -> 438B | 0.19096  |
| 418B -> 437B | 0.15116  |
| 418B -> 439B | -0.10160 |
| 418B -> 440B | 0.12159  |

Excited State 142: 3.000-A 2.3057 eV 537.72 nm f=0.0000 <S\*\*2>=2.000

|              |          |
|--------------|----------|
| 406A -> 439A | -0.11203 |
| 412A -> 437A | 0.15646  |
| 412A -> 439A | 0.12602  |
| 413A -> 437A | 0.10447  |
| 414A -> 439A | -0.11092 |
| 415A -> 437A | 0.12451  |
| 415A -> 438A | -0.11038 |
| 415A -> 439A | 0.10557  |
| 415A -> 440A | 0.12326  |
| 417A -> 440A | -0.10126 |
| 418A -> 438A | -0.32042 |
| 418A -> 440A | -0.11274 |
| 420A -> 439A | -0.16933 |

|              |          |
|--------------|----------|
| 406B -> 439B | 0.11203  |
| 412B -> 437B | -0.15646 |
| 412B -> 439B | -0.12602 |
| 413B -> 437B | -0.10447 |
| 414B -> 439B | 0.11092  |
| 415B -> 437B | -0.12451 |
| 415B -> 438B | 0.11038  |
| 415B -> 439B | -0.10557 |
| 415B -> 440B | -0.12326 |
| 417B -> 440B | 0.10126  |
| 418B -> 438B | 0.32042  |
| 418B -> 440B | 0.11274  |
| 420B -> 439B | 0.16933  |

Excited State 143: 3.000-A 2.3112 eV 536.45 nm f=0.0000 <S\*\*2>=2.000

|              |          |
|--------------|----------|
| 400A -> 437A | -0.12160 |
| 411A -> 437A | -0.11735 |
| 418A -> 439A | -0.10564 |
| 419A -> 437A | -0.38433 |
| 419A -> 438A | 0.24278  |
| 420A -> 440A | -0.12034 |
| 425A -> 438A | -0.10209 |
| 400B -> 437B | 0.12160  |
| 411B -> 437B | 0.11735  |
| 418B -> 439B | 0.10564  |
| 419B -> 437B | 0.38433  |
| 419B -> 438B | -0.24278 |
| 420B -> 440B | 0.12034  |
| 425B -> 438B | 0.10209  |

Excited State 144: 1.000-A 2.3124 eV 536.18 nm f=0.0024 <S\*\*2>=0.000

|              |          |
|--------------|----------|
| 418A -> 437A | 0.39139  |
| 419A -> 437A | 0.36068  |
| 420A -> 439A | -0.25548 |
| 421A -> 437A | -0.14183 |
| 418B -> 437B | 0.39139  |

419B -> 437B 0.36068  
420B -> 439B -0.25548  
421B -> 437B -0.14183

Excited State 145: 3.000-A 2.3255 eV 533.15 nm f=0.0000 <S\*\*2>=2.000

411A -> 438A -0.11824  
412A -> 438A 0.13194  
414A -> 439A 0.14175  
414A -> 440A -0.12217  
418A -> 437A -0.11216  
418A -> 438A -0.23356  
418A -> 439A -0.20844  
418A -> 440A 0.19856  
419A -> 438A -0.24877  
419A -> 439A -0.11191  
420A -> 439A 0.12886  
420A -> 440A -0.11145  
426A -> 440A -0.11805  
411B -> 438B 0.11824  
412B -> 438B -0.13194  
414B -> 439B -0.14175  
414B -> 440B 0.12217  
418B -> 437B 0.11216  
418B -> 438B 0.23356  
418B -> 439B 0.20844  
418B -> 440B -0.19856  
419B -> 438B 0.24877  
419B -> 439B 0.11191  
420B -> 439B -0.12886  
420B -> 440B 0.11145  
426B -> 440B 0.11805

Excited State 146: 1.000-A 2.3279 eV 532.59 nm f=0.0009 <S\*\*2>=0.000

424A -> 437A 0.41266  
424A -> 439A 0.50933  
424A -> 440A 0.14514

424B -> 437B 0.41266  
424B -> 439B 0.50933  
424B -> 440B 0.14514

Excited State 147: 3.000-A 2.3281 eV 532.56 nm f=0.0000 <S\*\*2>=2.000

424A -> 437A 0.42065  
424A -> 439A 0.51754  
424A -> 440A 0.14494  
424B -> 437B -0.42065  
424B -> 439B -0.51754  
424B -> 440B -0.14494

Excited State 148: 1.000-A 2.3310 eV 531.89 nm f=0.0103 <S\*\*2>=0.000

414A -> 437A -0.13955  
414A -> 438A -0.13133  
414A -> 439A 0.14893  
414A -> 440A -0.13790  
418A -> 437A -0.23443  
419A -> 437A 0.14910  
419A -> 438A 0.20836  
419A -> 439A -0.13085  
419A -> 440A 0.12415  
420A -> 440A 0.31025  
414B -> 437B -0.13955  
414B -> 438B -0.13133  
414B -> 439B 0.14893  
414B -> 440B -0.13790  
418B -> 437B -0.23443  
419B -> 437B 0.14910  
419B -> 438B 0.20836  
419B -> 439B -0.13085  
419B -> 440B 0.12415  
420B -> 440B 0.31025

Excited State 149: 1.000-A 2.3337 eV 531.28 nm f=0.0029 <S\*\*2>=0.000

412A -> 437A -0.16502

|              |          |
|--------------|----------|
| 413A -> 437A | -0.10318 |
| 415A -> 438A | 0.10833  |
| 415A -> 440A | -0.10163 |
| 416A -> 437A | -0.12795 |
| 417A -> 438A | 0.10134  |
| 418A -> 437A | 0.11125  |
| 418A -> 438A | 0.23789  |
| 419A -> 437A | -0.18669 |
| 419A -> 438A | 0.38786  |
| 420A -> 439A | -0.12704 |
| 424A -> 439A | 0.10752  |
| 425A -> 440A | 0.10747  |
| 412B -> 437B | -0.16502 |
| 413B -> 437B | -0.10318 |
| 415B -> 438B | 0.10833  |
| 415B -> 440B | -0.10163 |
| 416B -> 437B | -0.12795 |
| 417B -> 438B | 0.10134  |
| 418B -> 437B | 0.11125  |
| 418B -> 438B | 0.23789  |
| 419B -> 437B | -0.18669 |
| 419B -> 438B | 0.38786  |
| 420B -> 439B | -0.12704 |
| 424B -> 439B | 0.10752  |
| 425B -> 440B | 0.10747  |

Excited State 150: 3.000-A 2.3376 eV 530.38 nm f=0.0000 <S\*\*2>=2.000

|              |          |
|--------------|----------|
| 395A -> 437A | -0.15082 |
| 395A -> 438A | 0.11144  |
| 400A -> 437A | -0.11466 |
| 402A -> 439A | 0.10111  |
| 413A -> 437A | 0.15103  |
| 415A -> 437A | 0.10192  |
| 418A -> 437A | -0.10273 |
| 423A -> 437A | 0.11156  |
| 423A -> 439A | -0.10934 |

|              |          |
|--------------|----------|
| 425A -> 438A | 0.16312  |
| 425A -> 439A | -0.14103 |
| 425A -> 440A | -0.27014 |
| 395B -> 437B | 0.15082  |
| 395B -> 438B | -0.11144 |
| 400B -> 437B | 0.11466  |
| 402B -> 439B | -0.10111 |
| 413B -> 437B | -0.15103 |
| 415B -> 437B | -0.10192 |
| 418B -> 437B | 0.10273  |
| 423B -> 437B | -0.11156 |
| 423B -> 439B | 0.10934  |
| 425B -> 438B | -0.16312 |
| 425B -> 439B | 0.14103  |
| 425B -> 440B | 0.27014  |

Excited State 151: 3.000-A 2.3396 eV 529.94 nm f=0.0000 <S\*\*2>=2.000

|              |          |
|--------------|----------|
| 395A -> 437A | 0.11828  |
| 423A -> 437A | -0.16014 |
| 423A -> 438A | 0.11473  |
| 423A -> 439A | 0.19584  |
| 423A -> 440A | 0.11178  |
| 425A -> 438A | 0.25927  |
| 425A -> 439A | -0.20045 |
| 425A -> 440A | -0.37630 |
| 395B -> 437B | -0.11828 |
| 423B -> 437B | 0.16014  |
| 423B -> 438B | -0.11473 |
| 423B -> 439B | -0.19584 |
| 423B -> 440B | -0.11178 |
| 425B -> 438B | -0.25927 |
| 425B -> 439B | 0.20045  |
| 425B -> 440B | 0.37630  |

Excited State 152: 1.000-A 2.3396 eV 529.93 nm f=0.0055 <S\*\*2>=0.000

|              |          |
|--------------|----------|
| 418A -> 438A | -0.30097 |
|--------------|----------|



|              |          |
|--------------|----------|
| 418A -> 439A | -0.11562 |
| 419A -> 439A | -0.10999 |
| 423A -> 437A | -0.16809 |
| 423A -> 438A | 0.12479  |
| 423A -> 439A | 0.18709  |
| 425A -> 438A | -0.20090 |
| 425A -> 439A | 0.16943  |
| 425A -> 440A | 0.30358  |
| 418B -> 438B | -0.30097 |
| 418B -> 439B | -0.11562 |
| 419B -> 439B | -0.10999 |
| 423B -> 437B | -0.16809 |
| 423B -> 438B | 0.12479  |
| 423B -> 439B | 0.18709  |
| 425B -> 438B | -0.20090 |
| 425B -> 439B | 0.16943  |
| 425B -> 440B | 0.30358  |

Excited State 153: 1.000-A 2.3404 eV 529.77 nm  $f=0.0124$   $\langle S^{*2} \rangle=0.000$

|              |          |
|--------------|----------|
| 412A -> 437A | 0.14055  |
| 412A -> 439A | 0.10742  |
| 415A -> 437A | 0.13446  |
| 416A -> 437A | -0.11025 |
| 417A -> 437A | 0.26621  |
| 418A -> 439A | -0.14078 |
| 420A -> 438A | -0.10755 |
| 423A -> 437A | -0.18748 |
| 423A -> 438A | 0.12765  |
| 423A -> 439A | 0.23599  |
| 423A -> 440A | 0.12497  |
| 425A -> 440A | -0.16951 |
| 412B -> 437B | 0.14055  |
| 412B -> 439B | 0.10742  |
| 415B -> 437B | 0.13446  |
| 416B -> 437B | -0.11025 |
| 417B -> 437B | 0.26621  |

418B -> 439B -0.14078  
420B -> 438B -0.10755  
423B -> 437B -0.18748  
423B -> 438B 0.12765  
423B -> 439B 0.23599  
423B -> 440B 0.12497  
425B -> 440B -0.16951

Excited State 154: 1.000-A 2.3436 eV 529.04 nm f=0.0104 <S\*\*2>=0.000

412A -> 437A 0.12809  
417A -> 437A 0.24305  
420A -> 438A -0.13652  
423A -> 437A 0.17212  
423A -> 438A -0.13409  
423A -> 439A -0.21802  
423A -> 440A -0.11195  
425A -> 438A -0.19797  
425A -> 439A 0.16837  
425A -> 440A 0.31032  
412B -> 437B 0.12809  
417B -> 437B 0.24305  
420B -> 438B -0.13652  
423B -> 437B 0.17212  
423B -> 438B -0.13409  
423B -> 439B -0.21802  
423B -> 440B -0.11195  
425B -> 438B -0.19797  
425B -> 439B 0.16837  
425B -> 440B 0.31032

Excited State 155: 3.000-A 2.3446 eV 528.82 nm f=0.0000 <S\*\*2>=2.000

395A -> 437A 0.10506  
423A -> 437A 0.32691  
423A -> 438A -0.23892  
423A -> 439A -0.37447  
423A -> 440A -0.18466

|              |          |
|--------------|----------|
| 425A -> 440A | -0.10137 |
| 395B -> 437B | -0.10506 |
| 423B -> 437B | -0.32691 |
| 423B -> 438B | 0.23892  |
| 423B -> 439B | 0.37447  |
| 423B -> 440B | 0.18466  |
| 425B -> 440B | 0.10137  |

Excited State 156: 1.000-A 2.3475 eV 528.15 nm  $f=0.0087$   $\langle S^{*2} \rangle = 0.000$

|              |          |
|--------------|----------|
| 416A -> 437A | 0.10954  |
| 416A -> 438A | -0.10644 |
| 418A -> 438A | 0.24664  |
| 419A -> 437A | 0.16530  |
| 419A -> 438A | -0.11026 |
| 419A -> 440A | -0.13970 |
| 420A -> 439A | 0.14851  |
| 420A -> 440A | 0.14309  |
| 423A -> 437A | -0.21612 |
| 423A -> 438A | 0.15670  |
| 423A -> 439A | 0.24271  |
| 423A -> 440A | 0.12668  |
| 425A -> 440A | 0.16916  |
| 416B -> 437B | 0.10954  |
| 416B -> 438B | -0.10644 |
| 418B -> 438B | 0.24664  |
| 419B -> 437B | 0.16530  |
| 419B -> 438B | -0.11026 |
| 419B -> 440B | -0.13970 |
| 420B -> 439B | 0.14851  |
| 420B -> 440B | 0.14309  |
| 423B -> 437B | -0.21612 |
| 423B -> 438B | 0.15670  |
| 423B -> 439B | 0.24271  |
| 423B -> 440B | 0.12668  |
| 425B -> 440B | 0.16916  |

Excited State 157: 1.000-A 2.3499 eV 527.62 nm  $f=0.0108$   $\langle S^{*2} \rangle=0.000$

|              |          |
|--------------|----------|
| 410A -> 437A | -0.12540 |
| 412A -> 438A | 0.14752  |
| 415A -> 437A | -0.11014 |
| 415A -> 438A | -0.12967 |
| 417A -> 438A | 0.37584  |
| 417A -> 440A | -0.15318 |
| 418A -> 438A | -0.23920 |
| 418A -> 439A | 0.15499  |
| 419A -> 438A | 0.10421  |
| 420A -> 437A | -0.12816 |
| 420A -> 438A | -0.12021 |
| 420A -> 440A | 0.10886  |
| 410B -> 437B | -0.12540 |
| 412B -> 438B | 0.14752  |
| 415B -> 437B | -0.11014 |
| 415B -> 438B | -0.12967 |
| 417B -> 438B | 0.37584  |
| 417B -> 440B | -0.15318 |
| 418B -> 438B | -0.23920 |
| 418B -> 439B | 0.15499  |
| 419B -> 438B | 0.10421  |
| 420B -> 437B | -0.12816 |
| 420B -> 438B | -0.12021 |
| 420B -> 440B | 0.10886  |

Excited State 158: 3.000-A 2.3513 eV 527.30 nm  $f=0.0000$   $\langle S^{*2} \rangle=2.000$

|              |          |
|--------------|----------|
| 406A -> 438A | 0.10488  |
| 406A -> 439A | -0.13228 |
| 406A -> 440A | 0.11315  |
| 409A -> 439A | 0.11135  |
| 413A -> 437A | -0.16568 |
| 413A -> 438A | -0.17906 |
| 413A -> 439A | 0.12983  |
| 413A -> 440A | -0.14757 |
| 414A -> 437A | 0.13134  |

|              |          |
|--------------|----------|
| 414A -> 438A | 0.17592  |
| 414A -> 439A | -0.18882 |
| 414A -> 440A | 0.17113  |
| 419A -> 437A | -0.10186 |
| 419A -> 438A | -0.19072 |
| 420A -> 440A | -0.13545 |
| 406B -> 438B | -0.10488 |
| 406B -> 439B | 0.13228  |
| 406B -> 440B | -0.11315 |
| 409B -> 439B | -0.11135 |
| 413B -> 437B | 0.16568  |
| 413B -> 438B | 0.17906  |
| 413B -> 439B | -0.12983 |
| 413B -> 440B | 0.14757  |
| 414B -> 437B | -0.13134 |
| 414B -> 438B | -0.17592 |
| 414B -> 439B | 0.18882  |
| 414B -> 440B | -0.17113 |
| 419B -> 437B | 0.10186  |
| 419B -> 438B | 0.19072  |
| 420B -> 440B | 0.13545  |

Excited State 159: 3.000-A 2.3575 eV 525.92 nm  $f=0.0000$   $\langle S^2 \rangle=2.000$

|              |          |
|--------------|----------|
| 395A -> 437A | -0.10254 |
| 395A -> 439A | 0.11038  |
| 413A -> 437A | -0.19437 |
| 413A -> 438A | 0.15543  |
| 416A -> 437A | -0.21936 |
| 416A -> 438A | 0.13797  |
| 418A -> 437A | 0.15959  |
| 418A -> 438A | -0.16660 |
| 420A -> 439A | -0.20198 |
| 420A -> 440A | -0.16682 |
| 395B -> 437B | 0.10254  |
| 395B -> 439B | -0.11038 |
| 413B -> 437B | 0.19437  |

413B -> 438B -0.15543  
416B -> 437B 0.21936  
416B -> 438B -0.13797  
418B -> 437B -0.15959  
418B -> 438B 0.16660  
420B -> 439B 0.20198  
420B -> 440B 0.16682

Excited State 160: 3.000-A 2.3603 eV 525.28 nm f=0.0000 <S\*\*2>=2.000

409A -> 437A 0.10113  
413A -> 438A -0.11120  
413A -> 439A -0.22189  
417A -> 437A -0.16368  
417A -> 439A -0.12483  
418A -> 438A 0.11035  
418A -> 440A -0.20026  
419A -> 439A -0.29449  
419A -> 440A -0.11290  
420A -> 438A 0.13985  
425A -> 439A -0.11433  
425A -> 440A -0.12673  
409B -> 437B -0.10113  
413B -> 438B 0.11120  
413B -> 439B 0.22189  
417B -> 437B 0.16368  
417B -> 439B 0.12483  
418B -> 438B -0.11035  
418B -> 440B 0.20026  
419B -> 439B 0.29449  
419B -> 440B 0.11290  
420B -> 438B -0.13985  
425B -> 439B 0.11433  
425B -> 440B 0.12673

Excited State 161: 3.000-A 2.3713 eV 522.85 nm f=0.0000 <S\*\*2>=2.000

409A -> 438A -0.11523

|              |          |
|--------------|----------|
| 413A -> 438A | 0.17706  |
| 413A -> 440A | -0.12570 |
| 417A -> 438A | 0.23887  |
| 417A -> 439A | -0.14453 |
| 418A -> 439A | -0.25828 |
| 419A -> 438A | 0.15766  |
| 419A -> 439A | -0.12196 |
| 419A -> 440A | -0.12834 |
| 420A -> 439A | -0.10105 |
| 420A -> 440A | 0.18122  |
| 421A -> 438A | -0.10951 |
| 425A -> 440A | -0.11122 |
| 409B -> 438B | 0.11523  |
| 413B -> 438B | -0.17706 |
| 413B -> 440B | 0.12570  |
| 417B -> 438B | -0.23887 |
| 417B -> 439B | 0.14453  |
| 418B -> 439B | 0.25828  |
| 419B -> 438B | -0.15766 |
| 419B -> 439B | 0.12196  |
| 419B -> 440B | 0.12834  |
| 420B -> 439B | 0.10105  |
| 420B -> 440B | -0.18122 |
| 421B -> 438B | 0.10951  |
| 425B -> 440B | 0.11122  |

Excited State 162: 1.000-A 2.3774 eV 521.52 nm  $f=0.0084$   $\langle S^2 \rangle = 0.000$

|              |          |
|--------------|----------|
| 413A -> 437A | 0.12670  |
| 417A -> 438A | -0.22512 |
| 417A -> 439A | 0.12473  |
| 418A -> 439A | 0.40095  |
| 418A -> 440A | -0.11994 |
| 419A -> 439A | 0.27869  |
| 420A -> 440A | -0.13345 |
| 421A -> 439A | -0.14776 |
| 413B -> 437B | 0.12670  |

417B -> 438B -0.22512  
417B -> 439B 0.12473  
418B -> 439B 0.40095  
418B -> 440B -0.11994  
419B -> 439B 0.27869  
420B -> 440B -0.13345  
421B -> 439B -0.14776

Excited State 163: 3.000-A 2.3782 eV 521.33 nm f=0.0000 <S\*\*2>=2.000

408A -> 439A 0.10854  
411A -> 439A -0.12304  
413A -> 439A 0.11208  
413A -> 440A 0.20993  
418A -> 439A -0.29648  
419A -> 439A -0.10691  
419A -> 440A 0.11409  
420A -> 437A 0.19045  
421A -> 439A 0.17989  
426A -> 440A -0.16460  
408B -> 439B -0.10854  
411B -> 439B 0.12304  
413B -> 439B -0.11208  
413B -> 440B -0.20993  
418B -> 439B 0.29648  
419B -> 439B 0.10691  
419B -> 440B -0.11409  
420B -> 437B -0.19045  
421B -> 439B -0.17989  
426B -> 440B 0.16460

Excited State 164: 3.000-A 2.3888 eV 519.03 nm f=0.0000 <S\*\*2>=2.000

411A -> 440A -0.12325  
413A -> 439A 0.13224  
417A -> 440A -0.13486  
418A -> 438A -0.11292  
418A -> 440A -0.39126



|              |          |
|--------------|----------|
| 419A -> 440A | -0.26768 |
| 420A -> 438A | -0.14851 |
| 421A -> 440A | 0.19352  |
| 426A -> 439A | -0.16310 |
| 411B -> 440B | 0.12325  |
| 413B -> 439B | -0.13224 |
| 417B -> 440B | 0.13486  |
| 418B -> 438B | 0.11292  |
| 418B -> 440B | 0.39126  |
| 419B -> 440B | 0.26768  |
| 420B -> 438B | 0.14851  |
| 421B -> 440B | -0.19352 |
| 426B -> 439B | 0.16310  |

Excited State 165: 3.000-A 2.3930 eV 518.10 nm  $f=0.0000$   $\langle S^{*2} \rangle = 2.000$

|              |          |
|--------------|----------|
| 422A -> 439A | -0.17561 |
| 424A -> 438A | -0.34120 |
| 424A -> 439A | -0.10605 |
| 424A -> 440A | 0.49068  |
| 422B -> 439B | 0.17561  |
| 424B -> 438B | 0.34120  |
| 424B -> 439B | 0.10605  |
| 424B -> 440B | -0.49068 |

Excited State 166: 1.000-A 2.3932 eV 518.06 nm  $f=0.0002$   $\langle S^{*2} \rangle = 0.000$

|              |          |
|--------------|----------|
| 424A -> 438A | -0.38773 |
| 424A -> 439A | -0.12137 |
| 424A -> 440A | 0.56128  |
| 424B -> 438B | -0.38773 |
| 424B -> 439B | -0.12137 |
| 424B -> 440B | 0.56128  |

Excited State 167: 3.000-A 2.3938 eV 517.94 nm  $f=0.0000$   $\langle S^{*2} \rangle = 2.000$

|              |          |
|--------------|----------|
| 421A -> 439A | -0.13915 |
| 422A -> 437A | 0.22137  |
| 422A -> 438A | 0.14485  |

422A -> 439A -0.51417  
422A -> 440A 0.19162  
424A -> 438A 0.15120  
424A -> 440A -0.21743  
421B -> 439B 0.13915  
422B -> 437B -0.22137  
422B -> 438B -0.14485  
422B -> 439B 0.51417  
422B -> 440B -0.19162  
424B -> 438B -0.15120  
424B -> 440B 0.21743

Excited State 168: 1.000-A 2.3940 eV 517.90 nm  $f=0.0002$   $\langle S^{*2} \rangle=0.000$

421A -> 439A 0.13566  
422A -> 437A -0.24276  
422A -> 438A -0.14967  
422A -> 439A 0.57499  
422A -> 440A -0.21896  
421B -> 439B 0.13566  
422B -> 437B -0.24276  
422B -> 438B -0.14967  
422B -> 439B 0.57499  
422B -> 440B -0.21896

Excited State 169: 3.000-A 2.3953 eV 517.62 nm  $f=0.0000$   $\langle S^{*2} \rangle=2.000$

391A -> 438A -0.11402  
393A -> 437A 0.10745  
393A -> 438A 0.17900  
393A -> 440A -0.11917  
394A -> 438A -0.11446  
409A -> 437A 0.11612  
409A -> 438A 0.13144  
409A -> 440A -0.10756  
412A -> 437A -0.13668  
412A -> 438A -0.13926  
419A -> 437A 0.10698

|              |          |
|--------------|----------|
| 419A -> 438A | 0.10477  |
| 419A -> 439A | 0.11691  |
| 422A -> 439A | -0.18929 |
| 424A -> 438A | -0.11163 |
| 424A -> 440A | 0.15814  |
| 391B -> 438B | 0.11402  |
| 393B -> 437B | -0.10745 |
| 393B -> 438B | -0.17900 |
| 393B -> 440B | 0.11917  |
| 394B -> 438B | 0.11446  |
| 409B -> 437B | -0.11612 |
| 409B -> 438B | -0.13144 |
| 409B -> 440B | 0.10756  |
| 412B -> 437B | 0.13668  |
| 412B -> 438B | 0.13926  |
| 419B -> 437B | -0.10698 |
| 419B -> 438B | -0.10477 |
| 419B -> 439B | -0.11691 |
| 422B -> 439B | 0.18929  |
| 424B -> 438B | 0.11163  |
| 424B -> 440B | -0.15814 |

Excited State 170: 1.000-A 2.4027 eV 516.03 nm  $f=0.0140$   $\langle S^2 \rangle = 0.000$

|              |          |
|--------------|----------|
| 411A -> 438A | -0.10108 |
| 413A -> 437A | -0.20171 |
| 413A -> 439A | 0.14828  |
| 417A -> 439A | 0.23062  |
| 417A -> 440A | 0.16517  |
| 418A -> 440A | 0.33467  |
| 419A -> 440A | 0.30410  |
| 411B -> 438B | -0.10108 |
| 413B -> 437B | -0.20171 |
| 413B -> 439B | 0.14828  |
| 417B -> 439B | 0.23062  |
| 417B -> 440B | 0.16517  |
| 418B -> 440B | 0.33467  |

419B -> 440B 0.30410

Excited State 171: 1.000-A 2.4043 eV 515.68 nm f=0.0093 <S\*\*2>=0.000

413A -> 437A 0.29678

414A -> 437A 0.14108

414A -> 439A -0.11400

416A -> 437A 0.11136

417A -> 439A -0.20436

418A -> 439A -0.10446

418A -> 440A 0.34854

419A -> 437A 0.14590

419A -> 439A 0.20202

413B -> 437B 0.29678

414B -> 437B 0.14108

414B -> 439B -0.11400

416B -> 437B 0.11136

417B -> 439B -0.20436

418B -> 439B -0.10446

418B -> 440B 0.34854

419B -> 437B 0.14590

419B -> 439B 0.20202

Excited State 172: 1.000-A 2.4091 eV 514.66 nm f=0.0003 <S\*\*2>=0.000

411A -> 437A -0.11324

413A -> 438A -0.19340

413A -> 439A -0.16420

417A -> 437A 0.23203

417A -> 439A -0.18816

418A -> 438A 0.12556

418A -> 439A 0.26274

418A -> 440A 0.17232

419A -> 437A -0.11428

419A -> 438A -0.17707

419A -> 439A -0.21886

419A -> 440A 0.14184

421A -> 440A -0.12582

|              |          |
|--------------|----------|
| 411B -> 437B | -0.11324 |
| 413B -> 438B | -0.19340 |
| 413B -> 439B | -0.16420 |
| 417B -> 437B | 0.23203  |
| 417B -> 439B | -0.18816 |
| 418B -> 438B | 0.12556  |
| 418B -> 439B | 0.26274  |
| 418B -> 440B | 0.17232  |
| 419B -> 437B | -0.11428 |
| 419B -> 438B | -0.17707 |
| 419B -> 439B | -0.21886 |
| 419B -> 440B | 0.14184  |
| 421B -> 440B | -0.12582 |

Excited State 173: 1.000-A 2.4170 eV 512.96 nm  $f=0.0050$   $\langle S^{*2} \rangle = 0.000$

|              |          |
|--------------|----------|
| 406A -> 438A | 0.10420  |
| 406A -> 439A | -0.10546 |
| 406A -> 440A | 0.11198  |
| 408A -> 439A | 0.10513  |
| 411A -> 437A | 0.16288  |
| 411A -> 439A | -0.11999 |
| 413A -> 438A | 0.15201  |
| 413A -> 440A | 0.10922  |
| 414A -> 438A | 0.18604  |
| 414A -> 439A | -0.14272 |
| 414A -> 440A | 0.14507  |
| 416A -> 438A | 0.11838  |
| 416A -> 439A | -0.12818 |
| 416A -> 440A | 0.11740  |
| 417A -> 438A | 0.10482  |
| 417A -> 440A | 0.20968  |
| 419A -> 437A | -0.11533 |
| 406B -> 438B | 0.10420  |
| 406B -> 439B | -0.10546 |
| 406B -> 440B | 0.11198  |
| 408B -> 439B | 0.10513  |

|              |          |
|--------------|----------|
| 411B -> 437B | 0.16288  |
| 411B -> 439B | -0.11999 |
| 413B -> 438B | 0.15201  |
| 413B -> 440B | 0.10922  |
| 414B -> 438B | 0.18604  |
| 414B -> 439B | -0.14272 |
| 414B -> 440B | 0.14507  |
| 416B -> 438B | 0.11838  |
| 416B -> 439B | -0.12818 |
| 416B -> 440B | 0.11740  |
| 417B -> 438B | 0.10482  |
| 417B -> 440B | 0.20968  |
| 419B -> 437B | -0.11533 |

Excited State 174: 3.000-A 2.4181 eV 512.73 nm f=0.0000 <S\*\*2>=2.000

|              |          |
|--------------|----------|
| 392A -> 437A | 0.14568  |
| 392A -> 439A | 0.12954  |
| 392A -> 440A | 0.11247  |
| 393A -> 437A | -0.17997 |
| 393A -> 439A | -0.14626 |
| 394A -> 438A | 0.11103  |
| 394A -> 440A | -0.10921 |
| 395A -> 437A | -0.12084 |
| 407A -> 437A | 0.12051  |
| 412A -> 437A | -0.10118 |
| 415A -> 437A | -0.12712 |
| 417A -> 437A | -0.21148 |
| 418A -> 439A | -0.13994 |
| 419A -> 437A | 0.13828  |
| 419A -> 439A | 0.20371  |
| 392B -> 437B | -0.14568 |
| 392B -> 439B | -0.12954 |
| 392B -> 440B | -0.11247 |
| 393B -> 437B | 0.17997  |
| 393B -> 439B | 0.14626  |
| 394B -> 438B | -0.11103 |

|              |          |
|--------------|----------|
| 394B -> 440B | 0.10921  |
| 395B -> 437B | 0.12084  |
| 407B -> 437B | -0.12051 |
| 412B -> 437B | 0.10118  |
| 415B -> 437B | 0.12712  |
| 417B -> 437B | 0.21148  |
| 418B -> 439B | 0.13994  |
| 419B -> 437B | -0.13828 |
| 419B -> 439B | -0.20371 |

Excited State 175: 3.000-A 2.4250 eV 511.28 nm f=0.0000 <S\*\*2>=2.000

|              |          |
|--------------|----------|
| 392A -> 437A | 0.11036  |
| 395A -> 439A | -0.10416 |
| 417A -> 437A | 0.25013  |
| 417A -> 438A | -0.10336 |
| 417A -> 439A | -0.25903 |
| 418A -> 439A | 0.11387  |
| 422A -> 438A | -0.16130 |
| 422A -> 440A | -0.26902 |
| 392B -> 437B | -0.11036 |
| 395B -> 439B | 0.10416  |
| 417B -> 437B | -0.25013 |
| 417B -> 438B | 0.10336  |
| 417B -> 439B | 0.25903  |
| 418B -> 439B | -0.11387 |
| 422B -> 438B | 0.16130  |
| 422B -> 440B | 0.26902  |

Excited State 176: 1.000-A 2.4289 eV 510.45 nm f=0.0001 <S\*\*2>=0.000

|              |          |
|--------------|----------|
| 421A -> 440A | 0.11742  |
| 422A -> 437A | -0.10749 |
| 422A -> 438A | 0.31653  |
| 422A -> 439A | 0.23618  |
| 422A -> 440A | 0.54144  |
| 421B -> 440B | 0.11742  |
| 422B -> 437B | -0.10749 |

422B -> 438B 0.31653  
422B -> 439B 0.23618  
422B -> 440B 0.54144

Excited State 177: 3.000-A 2.4290 eV 510.43 nm f=0.0000 <S\*\*2>=2.000

417A -> 437A -0.14681  
421A -> 440A -0.10471  
422A -> 438A -0.26403  
422A -> 439A -0.21604  
422A -> 440A -0.44668  
417B -> 437B 0.14681  
421B -> 440B 0.10471  
422B -> 438B 0.26403  
422B -> 439B 0.21604  
422B -> 440B 0.44668

Excited State 178: 3.000-A 2.4309 eV 510.04 nm f=0.0000 <S\*\*2>=2.000

421A -> 440A 0.12288  
423A -> 438A -0.19814  
423A -> 439A 0.35760  
423A -> 440A -0.53220  
421B -> 440B -0.12288  
423B -> 438B 0.19814  
423B -> 439B -0.35760  
423B -> 440B 0.53220

Excited State 179: 1.000-A 2.4310 eV 510.01 nm f=0.0000 <S\*\*2>=0.000

421A -> 440A -0.13993  
423A -> 438A 0.19861  
423A -> 439A -0.35245  
423A -> 440A 0.53247  
421B -> 440B -0.13993  
423B -> 438B 0.19861  
423B -> 439B -0.35245  
423B -> 440B 0.53247



Excited State 180: 3.000-A 2.4346 eV 509.25 nm  $f=0.0000$   $\langle S^{*2} \rangle = 2.000$

|              |          |
|--------------|----------|
| 393A -> 438A | -0.13434 |
| 393A -> 440A | 0.12765  |
| 417A -> 438A | -0.23057 |
| 417A -> 439A | -0.20429 |
| 417A -> 440A | -0.12700 |
| 418A -> 437A | -0.13250 |
| 419A -> 437A | 0.18243  |
| 419A -> 438A | 0.17673  |
| 419A -> 440A | -0.13561 |
| 420A -> 440A | -0.11539 |
| 422A -> 440A | 0.13601  |
| 393B -> 438B | 0.13434  |
| 393B -> 440B | -0.12765 |
| 417B -> 438B | 0.23057  |
| 417B -> 439B | 0.20429  |
| 417B -> 440B | 0.12700  |
| 418B -> 437B | 0.13250  |
| 419B -> 437B | -0.18243 |
| 419B -> 438B | -0.17673 |
| 419B -> 440B | 0.13561  |
| 420B -> 440B | 0.11539  |
| 422B -> 440B | -0.13601 |

Excited State 181: 1.000-A 2.4452 eV 507.06 nm  $f=0.0021$   $\langle S^{*2} \rangle = 0.000$

|              |          |
|--------------|----------|
| 407A -> 437A | 0.11066  |
| 413A -> 437A | 0.15946  |
| 413A -> 438A | -0.24473 |
| 413A -> 440A | 0.16805  |
| 416A -> 438A | -0.11873 |
| 417A -> 437A | -0.13867 |
| 417A -> 438A | 0.11678  |
| 418A -> 439A | -0.11223 |
| 418A -> 440A | -0.18266 |
| 419A -> 438A | -0.13983 |
| 419A -> 439A | 0.17053  |

|              |          |
|--------------|----------|
| 419A -> 440A | 0.34618  |
| 407B -> 437B | 0.11066  |
| 413B -> 437B | 0.15946  |
| 413B -> 438B | -0.24473 |
| 413B -> 440B | 0.16805  |
| 416B -> 438B | -0.11873 |
| 417B -> 437B | -0.13867 |
| 417B -> 438B | 0.11678  |
| 418B -> 439B | -0.11223 |
| 418B -> 440B | -0.18266 |
| 419B -> 438B | -0.13983 |
| 419B -> 439B | 0.17053  |
| 419B -> 440B | 0.34618  |

Excited State 182: 3.000-A 2.4502 eV 506.01 nm f=0.0000 <S\*\*2>=2.000

|              |          |
|--------------|----------|
| 411A -> 439A | 0.16029  |
| 413A -> 440A | 0.12770  |
| 416A -> 437A | 0.15356  |
| 416A -> 438A | 0.22356  |
| 416A -> 439A | -0.15903 |
| 416A -> 440A | 0.18508  |
| 417A -> 438A | 0.21327  |
| 417A -> 439A | -0.28175 |
| 417A -> 440A | 0.18110  |
| 419A -> 438A | -0.10852 |
| 419A -> 439A | 0.18545  |
| 411B -> 439B | -0.16029 |
| 413B -> 440B | -0.12770 |
| 416B -> 437B | -0.15356 |
| 416B -> 438B | -0.22356 |
| 416B -> 439B | 0.15903  |
| 416B -> 440B | -0.18508 |
| 417B -> 438B | -0.21327 |
| 417B -> 439B | 0.28175  |
| 417B -> 440B | -0.18110 |
| 419B -> 438B | 0.10852  |

419B -> 439B -0.18545

Excited State 183: 1.000-A 2.4596 eV 504.07 nm f=0.0025 <S\*\*2>=0.000

411A -> 437A -0.12158

411A -> 438A -0.14921

411A -> 439A 0.15818

411A -> 440A -0.12575

413A -> 438A 0.10427

416A -> 437A 0.16272

416A -> 438A 0.25378

416A -> 439A -0.16877

416A -> 440A 0.20188

417A -> 438A 0.18342

417A -> 439A -0.14680

417A -> 440A 0.21408

411B -> 437B -0.12158

411B -> 438B -0.14921

411B -> 439B 0.15818

411B -> 440B -0.12575

413B -> 438B 0.10427

416B -> 437B 0.16272

416B -> 438B 0.25378

416B -> 439B -0.16877

416B -> 440B 0.20188

417B -> 438B 0.18342

417B -> 439B -0.14680

417B -> 440B 0.21408

Excited State 184: 3.000-A 2.4611 eV 503.77 nm f=0.0000 <S\*\*2>=2.000

416A -> 437A -0.16226

416A -> 438A -0.31431

416A -> 439A 0.14623

416A -> 440A -0.11939

417A -> 438A 0.11761

417A -> 439A -0.13649

417A -> 440A -0.14880

|              |          |
|--------------|----------|
| 418A -> 440A | -0.17779 |
| 419A -> 438A | -0.13800 |
| 419A -> 440A | 0.28689  |
| 416B -> 437B | 0.16226  |
| 416B -> 438B | 0.31431  |
| 416B -> 439B | -0.14623 |
| 416B -> 440B | 0.11939  |
| 417B -> 438B | -0.11761 |
| 417B -> 439B | 0.13649  |
| 417B -> 440B | 0.14880  |
| 418B -> 440B | 0.17779  |
| 419B -> 438B | 0.13800  |
| 419B -> 440B | -0.28689 |

Excited State 185: 1.000-A 2.4653 eV 502.91 nm  $f=0.0015$   $\langle S^{*2} \rangle = 0.000$

|              |          |
|--------------|----------|
| 413A -> 438A | -0.21349 |
| 413A -> 440A | -0.12412 |
| 414A -> 438A | -0.10942 |
| 416A -> 437A | 0.19888  |
| 416A -> 438A | 0.29937  |
| 416A -> 439A | -0.19946 |
| 416A -> 440A | 0.20303  |
| 417A -> 438A | -0.12410 |
| 417A -> 439A | 0.15722  |
| 417A -> 440A | -0.20072 |
| 418A -> 440A | 0.14265  |
| 413B -> 438B | -0.21349 |
| 413B -> 440B | -0.12412 |
| 414B -> 438B | -0.10942 |
| 416B -> 437B | 0.19888  |
| 416B -> 438B | 0.29937  |
| 416B -> 439B | -0.19946 |
| 416B -> 440B | 0.20303  |
| 417B -> 438B | -0.12410 |
| 417B -> 439B | 0.15722  |
| 417B -> 440B | -0.20072 |

418B -> 440B 0.14265

Excited State 186: 3.000-A 2.4655 eV 502.88 nm f=0.0000 <S\*\*2>=2.000

413A -> 439A 0.12236

416A -> 437A 0.14408

416A -> 438A 0.17447

416A -> 439A -0.15038

416A -> 440A 0.16638

417A -> 438A -0.10477

417A -> 439A 0.13778

417A -> 440A -0.35488

418A -> 438A 0.14915

418A -> 439A -0.11311

419A -> 438A -0.15823

413B -> 439B -0.12236

416B -> 437B -0.14408

416B -> 438B -0.17447

416B -> 439B 0.15038

416B -> 440B -0.16638

417B -> 438B 0.10477

417B -> 439B -0.13778

417B -> 440B 0.35488

418B -> 438B -0.14915

418B -> 439B 0.11311

419B -> 438B 0.15823

Excited State 187: 1.000-A 2.4747 eV 501.01 nm f=0.0077 <S\*\*2>=0.000

407A -> 439A -0.11903

409A -> 439A -0.11285

411A -> 439A -0.10152

413A -> 437A 0.36373

417A -> 439A 0.30259

418A -> 437A 0.10442

419A -> 437A -0.15786

419A -> 439A -0.15722

407B -> 439B -0.11903

409B -> 439B -0.11285  
 411B -> 439B -0.10152  
 413B -> 437B 0.36373  
 417B -> 439B 0.30259  
 418B -> 437B 0.10442  
 419B -> 437B -0.15786  
 419B -> 439B -0.15722

Excited State 188: 3.000-A 2.4824 eV 499.46 nm f=0.0000 <S\*\*2>=2.000

411A -> 437A -0.34042  
 411A -> 438A 0.19659  
 411A -> 439A 0.11175  
 413A -> 437A -0.24160  
 413A -> 438A 0.19731  
 414A -> 437A 0.10672  
 415A -> 437A 0.16720  
 415A -> 438A -0.11394  
 416A -> 438A -0.11915  
 417A -> 439A 0.10945  
 417A -> 440A 0.10685  
 419A -> 437A 0.12995  
 411B -> 437B 0.34042  
 411B -> 438B -0.19659  
 411B -> 439B -0.11175  
 413B -> 437B 0.24160  
 413B -> 438B -0.19731  
 414B -> 437B -0.10672  
 415B -> 437B -0.16720  
 415B -> 438B 0.11394  
 416B -> 438B 0.11915  
 417B -> 439B -0.10945  
 417B -> 440B -0.10685  
 419B -> 437B -0.12995

Excited State 189: 1.000-A 2.4867 eV 498.59 nm f=0.0135 <S\*\*2>=0.000

403A -> 437A -0.12887

|              |          |
|--------------|----------|
| 406A -> 439A | 0.11237  |
| 411A -> 437A | 0.36189  |
| 411A -> 438A | -0.16656 |
| 413A -> 438A | -0.15590 |
| 413A -> 439A | -0.17650 |
| 414A -> 437A | -0.16646 |
| 415A -> 437A | -0.15692 |
| 415A -> 438A | 0.10313  |
| 417A -> 439A | -0.17189 |
| 419A -> 438A | 0.10806  |
| 403B -> 437B | -0.12887 |
| 406B -> 439B | 0.11237  |
| 411B -> 437B | 0.36189  |
| 411B -> 438B | -0.16656 |
| 413B -> 438B | -0.15590 |
| 413B -> 439B | -0.17650 |
| 414B -> 437B | -0.16646 |
| 415B -> 437B | -0.15692 |
| 415B -> 438B | 0.10313  |
| 417B -> 439B | -0.17189 |
| 419B -> 438B | 0.10806  |

Excited State 190: 1.000-A 2.4950 eV 496.93 nm  $f=0.0199$   $\langle S^2 \rangle=0.000$

|              |          |
|--------------|----------|
| 399A -> 438A | 0.10864  |
| 402A -> 437A | 0.11476  |
| 402A -> 438A | 0.10514  |
| 404A -> 437A | -0.14393 |
| 405A -> 438A | -0.16761 |
| 406A -> 438A | 0.16636  |
| 409A -> 437A | 0.22496  |
| 409A -> 438A | 0.10750  |
| 409A -> 440A | -0.12143 |
| 410A -> 437A | -0.12952 |
| 412A -> 438A | -0.11129 |
| 413A -> 437A | -0.13442 |
| 413A -> 438A | -0.10703 |

|              |          |
|--------------|----------|
| 417A -> 440A | 0.17104  |
| 399B -> 438B | 0.10864  |
| 402B -> 437B | 0.11476  |
| 402B -> 438B | 0.10514  |
| 404B -> 437B | -0.14393 |
| 405B -> 438B | -0.16761 |
| 406B -> 438B | 0.16636  |
| 409B -> 437B | 0.22496  |
| 409B -> 438B | 0.10750  |
| 409B -> 440B | -0.12143 |
| 410B -> 437B | -0.12952 |
| 412B -> 438B | -0.11129 |
| 413B -> 437B | -0.13442 |
| 413B -> 438B | -0.10703 |
| 417B -> 440B | 0.17104  |

Excited State 191: 1.000-A 2.4975 eV 496.43 nm  $f=0.0015$   $\langle S^{*2} \rangle=0.000$

|              |          |
|--------------|----------|
| 402A -> 438A | -0.10618 |
| 403A -> 439A | 0.13393  |
| 404A -> 438A | 0.15633  |
| 405A -> 437A | 0.21319  |
| 406A -> 437A | -0.13598 |
| 409A -> 438A | -0.15230 |
| 410A -> 437A | 0.15695  |
| 412A -> 437A | 0.15774  |
| 412A -> 438A | 0.12438  |
| 413A -> 437A | -0.12206 |
| 413A -> 438A | -0.11554 |
| 413A -> 439A | -0.10070 |
| 416A -> 439A | -0.10471 |
| 417A -> 440A | 0.11402  |
| 419A -> 437A | 0.11776  |
| 419A -> 440A | -0.10946 |
| 402B -> 438B | -0.10618 |
| 403B -> 439B | 0.13393  |
| 404B -> 438B | 0.15633  |



|              |          |
|--------------|----------|
| 405B -> 437B | 0.21319  |
| 406B -> 437B | -0.13598 |
| 409B -> 438B | -0.15230 |
| 410B -> 437B | 0.15695  |
| 412B -> 437B | 0.15774  |
| 412B -> 438B | 0.12438  |
| 413B -> 437B | -0.12206 |
| 413B -> 438B | -0.11554 |
| 413B -> 439B | -0.10070 |
| 416B -> 439B | -0.10471 |
| 417B -> 440B | 0.11402  |
| 419B -> 437B | 0.11776  |
| 419B -> 440B | -0.10946 |

Excited State 192: 1.000-A 2.5047 eV 495.01 nm  $f=0.0107$   $\langle S^2 \rangle=0.000$

|              |          |
|--------------|----------|
| 400A -> 439A | -0.10055 |
| 403A -> 437A | 0.21895  |
| 403A -> 438A | -0.11113 |
| 404A -> 439A | -0.13742 |
| 405A -> 439A | 0.12851  |
| 406A -> 437A | -0.10218 |
| 406A -> 439A | -0.11349 |
| 406A -> 440A | -0.10761 |
| 407A -> 437A | -0.11753 |
| 409A -> 437A | -0.10085 |
| 410A -> 437A | -0.10267 |
| 411A -> 437A | 0.11019  |
| 411A -> 438A | -0.11222 |
| 412A -> 437A | 0.16675  |
| 412A -> 439A | 0.10116  |
| 413A -> 437A | 0.11669  |
| 413A -> 438A | -0.15381 |
| 415A -> 438A | 0.10987  |
| 416A -> 437A | -0.11805 |
| 417A -> 439A | -0.10992 |
| 400B -> 439B | -0.10055 |

|              |          |
|--------------|----------|
| 403B -> 437B | 0.21895  |
| 403B -> 438B | -0.11113 |
| 404B -> 439B | -0.13742 |
| 405B -> 439B | 0.12851  |
| 406B -> 437B | -0.10218 |
| 406B -> 439B | -0.11349 |
| 406B -> 440B | -0.10761 |
| 407B -> 437B | -0.11753 |
| 409B -> 437B | -0.10085 |
| 410B -> 437B | -0.10267 |
| 411B -> 437B | 0.11019  |
| 411B -> 438B | -0.11222 |
| 412B -> 437B | 0.16675  |
| 412B -> 439B | 0.10116  |
| 413B -> 437B | 0.11669  |
| 413B -> 438B | -0.15381 |
| 415B -> 438B | 0.10987  |
| 416B -> 437B | -0.11805 |
| 417B -> 439B | -0.10992 |

Excited State 193: 3.000-A 2.5099 eV 493.97 nm f=0.0000 <S\*\*2>=2.000

|              |          |
|--------------|----------|
| 409A -> 440A | 0.10179  |
| 410A -> 437A | -0.26224 |
| 410A -> 438A | -0.18779 |
| 410A -> 439A | -0.15367 |
| 410A -> 440A | 0.16095  |
| 411A -> 437A | -0.13910 |
| 411A -> 438A | -0.25828 |
| 413A -> 437A | 0.10725  |
| 413A -> 438A | 0.19301  |
| 414A -> 437A | 0.11608  |
| 414A -> 438A | 0.18572  |
| 415A -> 438A | 0.13902  |
| 417A -> 438A | -0.16723 |
| 418A -> 438A | 0.10673  |
| 409B -> 440B | -0.10179 |

|              |          |
|--------------|----------|
| 410B -> 437B | 0.26224  |
| 410B -> 438B | 0.18779  |
| 410B -> 439B | 0.15367  |
| 410B -> 440B | -0.16095 |
| 411B -> 437B | 0.13910  |
| 411B -> 438B | 0.25828  |
| 413B -> 437B | -0.10725 |
| 413B -> 438B | -0.19301 |
| 414B -> 437B | -0.11608 |
| 414B -> 438B | -0.18572 |
| 415B -> 438B | -0.13902 |
| 417B -> 438B | 0.16723  |
| 418B -> 438B | -0.10673 |

Excited State 194: 1.000-A 2.5139 eV 493.19 nm  $f=0.0039$   $\langle S^{*2} \rangle = 0.000$

|              |          |
|--------------|----------|
| 404A -> 437A | 0.14958  |
| 405A -> 438A | 0.11878  |
| 409A -> 437A | -0.14218 |
| 410A -> 437A | -0.28494 |
| 411A -> 437A | -0.20093 |
| 411A -> 439A | -0.11007 |
| 412A -> 438A | 0.11573  |
| 413A -> 438A | -0.19291 |
| 417A -> 440A | 0.28624  |
| 419A -> 438A | 0.14207  |
| 419A -> 440A | -0.15470 |
| 404B -> 437B | 0.14958  |
| 405B -> 438B | 0.11878  |
| 409B -> 437B | -0.14218 |
| 410B -> 437B | -0.28494 |
| 411B -> 437B | -0.20093 |
| 411B -> 439B | -0.11007 |
| 412B -> 438B | 0.11573  |
| 413B -> 438B | -0.19291 |
| 417B -> 440B | 0.28624  |
| 419B -> 438B | 0.14207  |

419B -> 440B -0.15470

Excited State 195: 1.000-A 2.5234 eV 491.34 nm f=0.0040 <S\*\*2>=0.000

405A -> 437A -0.10333

406A -> 437A 0.15287

410A -> 437A 0.30758

410A -> 438A 0.13781

410A -> 439A 0.16791

411A -> 438A 0.13284

413A -> 438A -0.28328

414A -> 438A -0.15491

417A -> 438A 0.16069

417A -> 440A 0.13693

418A -> 438A -0.11032

405B -> 437B -0.10333

406B -> 437B 0.15287

410B -> 437B 0.30758

410B -> 438B 0.13781

410B -> 439B 0.16791

411B -> 438B 0.13284

413B -> 438B -0.28328

414B -> 438B -0.15491

417B -> 438B 0.16069

417B -> 440B 0.13693

418B -> 438B -0.11032

Excited State 196: 3.000-A 2.5236 eV 491.30 nm f=0.0000 <S\*\*2>=2.000

391A -> 438A -0.10181

391A -> 439A 0.10769

407A -> 437A 0.13646

409A -> 438A -0.17100

410A -> 437A -0.33392

410A -> 440A -0.12359

411A -> 438A 0.10774

411A -> 439A -0.12000

413A -> 437A -0.14569

|              |          |
|--------------|----------|
| 413A -> 440A | -0.11072 |
| 414A -> 437A | -0.12883 |
| 417A -> 440A | 0.16051  |
| 418A -> 440A | -0.10013 |
| 419A -> 440A | 0.11360  |
| 391B -> 438B | 0.10181  |
| 391B -> 439B | -0.10769 |
| 407B -> 437B | -0.13646 |
| 409B -> 438B | 0.17100  |
| 410B -> 437B | 0.33392  |
| 410B -> 440B | 0.12359  |
| 411B -> 438B | -0.10774 |
| 411B -> 439B | 0.12000  |
| 413B -> 437B | 0.14569  |
| 413B -> 440B | 0.11072  |
| 414B -> 437B | 0.12883  |
| 417B -> 440B | -0.16051 |
| 418B -> 440B | 0.10013  |
| 419B -> 440B | -0.11360 |

Excited State 197: 1.000-A 2.5274 eV 490.57 nm  $f=0.0062$   $\langle S^2 \rangle=0.000$

|              |          |
|--------------|----------|
| 405A -> 437A | -0.11552 |
| 406A -> 437A | 0.14091  |
| 409A -> 437A | 0.13783  |
| 411A -> 439A | 0.13202  |
| 412A -> 437A | 0.29002  |
| 412A -> 439A | 0.12421  |
| 413A -> 439A | -0.17795 |
| 414A -> 437A | 0.13124  |
| 415A -> 438A | 0.34160  |
| 415A -> 440A | -0.15019 |
| 417A -> 437A | -0.13033 |
| 417A -> 439A | 0.10783  |
| 405B -> 437B | -0.11552 |
| 406B -> 437B | 0.14091  |
| 409B -> 437B | 0.13783  |

|              |          |
|--------------|----------|
| 411B -> 439B | 0.13202  |
| 412B -> 437B | 0.29002  |
| 412B -> 439B | 0.12421  |
| 413B -> 439B | -0.17795 |
| 414B -> 437B | 0.13124  |
| 415B -> 438B | 0.34160  |
| 415B -> 440B | -0.15019 |
| 417B -> 437B | -0.13033 |
| 417B -> 439B | 0.10783  |

Excited State 198: 3.000-A 2.5292 eV 490.21 nm f=0.0000 <S\*\*2>=2.000

|              |          |
|--------------|----------|
| 391A -> 438A | -0.10922 |
| 391A -> 439A | 0.14061  |
| 391A -> 440A | -0.14289 |
| 410A -> 437A | 0.12977  |
| 410A -> 438A | -0.31005 |
| 410A -> 439A | 0.11455  |
| 410A -> 440A | 0.14118  |
| 413A -> 437A | 0.19470  |
| 413A -> 439A | 0.14580  |
| 416A -> 437A | 0.12544  |
| 416A -> 439A | 0.11782  |
| 419A -> 439A | -0.13469 |
| 391B -> 438B | 0.10922  |
| 391B -> 439B | -0.14061 |
| 391B -> 440B | 0.14289  |
| 410B -> 437B | -0.12977 |
| 410B -> 438B | 0.31005  |
| 410B -> 439B | -0.11455 |
| 410B -> 440B | -0.14118 |
| 413B -> 437B | -0.19470 |
| 413B -> 439B | -0.14580 |
| 416B -> 437B | -0.12544 |
| 416B -> 439B | -0.11782 |
| 419B -> 439B | 0.13469  |

Excited State 199: 3.000-A 2.5309 eV 489.88 nm f=0.0000 <S\*\*2>=2.000

|              |          |
|--------------|----------|
| 411A -> 438A | -0.11200 |
| 412A -> 437A | -0.38241 |
| 412A -> 439A | -0.15736 |
| 415A -> 438A | -0.39588 |
| 415A -> 440A | 0.16638  |
| 411B -> 438B | 0.11200  |
| 412B -> 437B | 0.38241  |
| 412B -> 439B | 0.15736  |
| 415B -> 438B | 0.39588  |
| 415B -> 440B | -0.16638 |

Excited State 200: 3.000-A 2.5337 eV 489.35 nm f=0.0000 <S\*\*2>=2.000

|              |          |
|--------------|----------|
| 391A -> 438A | -0.10501 |
| 391A -> 439A | 0.14755  |
| 391A -> 440A | -0.14638 |
| 410A -> 438A | 0.15967  |
| 411A -> 437A | -0.19914 |
| 411A -> 438A | -0.10128 |
| 411A -> 439A | 0.10026  |
| 412A -> 438A | -0.13229 |
| 413A -> 439A | -0.13617 |
| 414A -> 437A | -0.25316 |
| 414A -> 438A | 0.14802  |
| 414A -> 440A | 0.13076  |
| 415A -> 440A | 0.10584  |
| 416A -> 437A | -0.16017 |
| 417A -> 440A | -0.12146 |
| 391B -> 438B | 0.10501  |
| 391B -> 439B | -0.14755 |
| 391B -> 440B | 0.14638  |
| 410B -> 438B | -0.15967 |
| 411B -> 437B | 0.19914  |
| 411B -> 438B | 0.10128  |
| 411B -> 439B | -0.10026 |
| 412B -> 438B | 0.13229  |

|              |          |
|--------------|----------|
| 413B -> 439B | 0.13617  |
| 414B -> 437B | 0.25316  |
| 414B -> 438B | -0.14802 |
| 414B -> 440B | -0.13076 |
| 415B -> 440B | -0.10584 |
| 416B -> 437B | 0.16017  |
| 417B -> 440B | 0.12146  |

## 11. References

- S1. H. Yamashita, T. Ikezawa, Y. Kobayashi and J. Abe, *J. Am. Chem. Soc.*, 2015, **137**, 4952–4955.
- S2. B. Orwat, M. J. Oh, M. Zaranek, M. Kubicki, R. Januszewski and I. Kownacki, *Inorg. Chem.*, 2020, **59**, 9163–9176.
- S3. G. M. Sheldrick, *Acta Crystallogr. Sect. A* 2008, **64**, 112–122.
- S4. a) A. L. Spek, PLATON, *A Multipurpose Crystallographic Tool*; Utrecht University, Utrecht, The Netherlands, 2005; b) P. van der Sluis, A. L. Spek, *Acta Crystallogr. Sect. A* 1990, **46**, 194–201.
- S5. J. J. Snellenburg, S. P. Liptonok, R. Seger, K.M. Mullen, I. H. M. van Stokkum, *J. Stat. Software* 2012, **49**, 1–22.
- S6. Y. Kobayashi, H. Okajima, H. Sotome, T. Yanai, K. Mutoh, Y. Yoneda, Y. Shigeta, A. Sakamoto, H. Miyasaka, J. Abe, *J. Am. Chem. Soc.* 2017, **139**, 6382–6389.
- S7. R. Usui, K. Yamamoto, H. Okajima, K. Mutoh, A. Sakamoto, J. Abe, Y. Kobayashi, *J. Am. Chem. Soc.* 2020, **142**, 10132–10142.
- S8. H. Yamashita, J. Abe, *Chem. Commun.*, 2014, **50**, 8468–8471.
- S9. Y. Kobayashi, K. Shima, K. Mutoh, J. Abe, *J. Phys. Chem. Lett.*, 2016, **7**, 3067–3072.
- S10. Frisch, M. J.; Trucks, G. W.; Schlegel, H. B.; Scuseria, G. E.; Robb, M. A.; Cheeseman, J. R.; Scalmani, G.; Barone, V.; Mennucci, B.; Petersson, G. A.; et al. Gaussian 09, **2009**.
